# Supplementary material for: Multi-omics assessment of dilated cardiomyopathy using non-negative matrix factorization
Source: PLoS One. 2022 Aug 18;17(8):e0272093. doi: 10.1371/journal.pone.0272093 (PMC9387871; doi:10.1371/journal.pone.0272093)
Supplement: S1 File — The excel file documents details of the performed NMF runs. NMF was performed once each. at rank 2, 3, and 4 and repeated thrice at rank 5. The overlap between common selected features at each threshold is also shown. In addition, GO terms related to the selected features are listed. (XLSX) [file pone.0272093.s019.xlsx]

## Sheet: NMF_runs
This sheet contains more information on the NMF runs performed.
Run1	Rank=5
>r5_1 = nmf(nmf_norm, 5, seed=112233, nrun=30)
>r5_1
<Object of class: NMFfitX1 >
Method: brunet
Runs: 30
RNG:
407L, -976353169L, -455515164L, -1341419115L, 557655378L, -567407445L, 1311757296L
Total timing:
user system elapsed
31382.037 1683.664 2305.229
Run2
>r5_2 = nmf(nmf_norm, 5, seed=012203, nrun=30)
> r5_2
<Object of class: NMFfitX1 >
Method: brunet
Runs: 30
RNG:
407L, -1056563977L, -28001076L, -1271035043L, 12145274L, 1343307187L, 1000570712L
Total timing:
user system elapsed
32880.454 1810.574 2398.506
Run3
> r5_3 = nmf(nmf_norm, 5, seed=110230, nrun=30)
> r5_3
<Object of class: NMFfitX1 >
Method: brunet
Runs: 30
RNG:
407L, -1576124208L, -1081837935L, -1918284002L, 1488380167L, 887524764L, -1620291091L
Total timing:
user system elapsed
30178.082 1630.592 2281.879
> r2	Rank=2
<Object of class: NMFfitX1 >
Method: brunet
Runs: 30
RNG:
407L, -1430690590L, -2055781637L, 836919808L, -750618111L, 107921358L, -2042950153L
Total timing:
user system elapsed
11613.228 316.043 962.787
> r3	Rank=3
<Object of class: NMFfitX1 >
Method: brunet
Runs: 30
RNG:
407L, -1430690590L, -2055781637L, 836919808L, -750618111L, 107921358L, -2042950153L
Total timing:
user system elapsed
16649.481 266.416 1211.328
> r4	Rank=4
<Object of class: NMFfitX1 >
Method: brunet
Runs: 30
RNG:
407L, -1430690590L, -2055781637L, 836919808L, -750618111L, 107921358L, -2042950153L
Total timing:
user system elapsed
26075.255 420.486 1681.327

## Sheet: overlap_features_selected
The number of common features selected for a pair of latent factors over the different percentiles in shown. At higher thresholds, e.g. the 25th and 75th thresholds, the overlap is high and it decreases with lower thresholds.
q99 genes
	LF1	LF2	LF3	LF4	LF5
LF1	322	2	1	0	0
LF2	2	731	2	0	0
LF3	1	2	250	0	1
LF4	0	0	0	9	0
LF5	0	0	1	0	413
q99 cpg
	LF1	LF2	LF3	LF4	LF5
LF1	1373	4	3	5	0
LF2	4	964	0	31	2
LF3	3	0	1445	1	0
LF4	5	31	1	1686	1
LF5	0	2	0	1	1281
q95 genes
	LF1	LF2	LF3	LF4	LF5
LF1
LF2	521	4	1	0	0
LF3	4	981	8	3	1
LF4	1	8	432	0	2
LF5	0	3	0	26	0
	0	1	2	0	799
q95 cpg
	LF1	LF2	LF3	LF4	LF5
LF1	7951	253	278	285	24
LF2	253	7491	197	1360	67
LF3	278	197	8040	80	18
LF4	285	1360	80	8446	392
LF5	24	67	18	392	7672
q90 genes
	LF1	LF2	LF3	LF4	LF5
LF1	665	12	7	0	1
LF2	12	1164	15	6	2
LF3	7	15	575	0	5
LF4	0	6	0	41	0
LF5	1	2	5	0	1030
q90 cpg
	LF1	LF2	LF3	LF4	LF5
LF1
LF2	16279	1656	1533	1748	343
LF3	1656	15780	1812	5178	986
LF4	1533	1812	16369	1196	283
LF5	1748	5178	1196	16903	2205
	343	986	283	2205	15912
q75 genes
	LF1	LF2	LF3	LF4	LF5
LF1	997	35	12	3	2
LF2	35	1483	42	42	6
LF3	12	42	875	2	27
LF4	3	42	2	124	0
LF5	2	6	27	0	1509
q75 cpg
	LF1	LF2	LF3	LF4	LF5
LF1	41363	13743	12186	14581	7627
LF2	13743	40877	15201	23529	12609
LF3	12186	15201	41485	14744	8981
LF4	14581	23529	14744	42236	15674
LF5	7627	12609	8981	15674	40849
q25 genes
	LF1	LF2	LF3	LF4	LF5
LF1	3922	742	607	503	370
LF2	742	3270	889	909	157
LF3	607	889	3356	381	522
LF4	503	909	381	1540	158
LF5	370	157	522	158	3830
q25 cpg
	LF1	LF2	LF3	LF4	LF5
LF1	123156	108358	107018	109967	104674
LF2	108358	123808	108589	115294	108796
LF3	107018	108589	123722	110626	106297
LF4	109967	115294	110626	125537	110152
LF5	104674	108796	106297	110152	123246

## Sheet: Reactome_DB_common_gene_CpG
The supplementary file lists the top 10 significant Reactome pathway database hits obtained for an enrichment analysis between overlap of selected gene features and the gene features associated with selected CpGs.
LF1	Term	Overlap	P-value	Adjusted P-value	Old P-value	Old Adjusted P-value	Odds Ratio	Combined Score	Genes
	Interferon gamma signaling Homo sapiens R-HSA-877300	9/93	3.575040635545822E-7	2.0592234060743935E-4	0	0	11.178004535147393	165.92763071274155	SP100;STAT1;IRF1;IRF2;TRIM14;IRF8;HLA-F;IRF9;CD44
	Immune System Homo sapiens R-HSA-168256	35/1547	3.32419786060388E-6	7.233411790840095E-4	0	0	2.5974210406725744	32.764601889888965	CSF1R;CD40;SP100;ITGAM;C1S;IL24;NLRC5;UBE2L6;C3;PSTPIP1;RAP1A;PLCG2;RAC1;JAK3;NCK1;VAV3;IL32;PDIA3;RIPK3;STAT1;CRTAM;IL18;HLA-F;DYNLL1;NFKB1;CD4;IRF1;IRF2;POLR1C;PSME1;TRIM14;IRF8;CD247;CD44;IRF9
	Cytokine Signaling in Immune system Homo sapiens R-HSA-1280215	20/620	3.7674019743958828E-6	7.233411790840095E-4	0	0	3.595880149812734	44.90939640822522	IL32;CSF1R;CD40;SP100;STAT1;IL24;IL18;UBE2L6;HLA-F;NFKB1;CD4;RAP1A;IRF1;IRF2;PSME1;TRIM14;IRF8;JAK3;CD44;IRF9
	GPVI-mediated activation cascade Homo sapiens R-HSA-114604	6/53	1.3603142032916122E-5	0.0019588524527399216	0	0	13.13497340425532	147.18013218767337	VAV3;PLCG2;RAC1;JAK3;RHOA;PIK3R5
	p75 NTR receptor-mediated signalling Homo sapiens R-HSA-193704	7/83	1.8427939393679145E-5	0.0021228986181518377	0	0	9.512400110223203	103.70078626712463	VAV3;HDAC1;ARHGEF3;RAC1;RHOA;NFKB1;FGD2
	Interferon Signaling Homo sapiens R-HSA-913531	10/196	2.6725018845915767E-5	0.0025656018092079136	0	0	5.609700297414779	59.06964147948621	SP100;STAT1;IRF1;IRF2;TRIM14;IRF8;UBE2L6;HLA-F;CD44;IRF9
	Sema4D mediated inhibition of cell attachment and migration Homo sapiens R-HSA-416550	3/8	5.1594689440181575E-5	0.004128970393159701	0	0	60.91384615384615	601.3470816456503	SEMA4D;RAC1;RHOA
	Interferon alpha/beta signaling Homo sapiens R-HSA-909733	6/68	5.734681101610696E-5	0.004128970393159701	0	0	9.949596774193548	97.17167548792366	STAT1;IRF1;IRF2;IRF8;HLA-F;IRF9
	SRP-dependent cotranslational protein targeting to membrane Homo sapiens R-HSA-1799339	7/107	9.478636930406882E-5	0.006066327635460405	0	0	7.220628272251309	66.89106952852927	RPS7;SRP72;RPL31;RPL23;RPL22;RPL7;RPS23
	Selenoamino acid metabolism Homo sapiens R-HSA-2408522	7/111	1.1942315464770814E-4	0.006878773707707989	0	0	6.941502215062425	62.70146117291678	RPS7;RPL31;RPL23;RPL22;RPL7;RPS23;PAPSS1
LF2	Term	Overlap	P-value	Adjusted P-value	Old P-value	Old Adjusted P-value	Odds Ratio	Combined Score	Genes
	Gene Expression Homo sapiens R-HSA-74160	58/1631	3.599902560442102E-4	0.11561521044578943	0	0	1.686552170938014	13.373403441298544	ZNF770;EIF4A1;SMG1;CCNT1;RORA;ARID4B;NR3C1;ZFP30;ZNF606;SESN1;JARID2;TEAD1;RBM5;WDR36;NUP133;SIRT1;MED23;AEBP2;HNRNPH1;TBL1XR1;KIAA1456;PGR;ZNF799;SRSF5;ZNF555;ZNF234;ZNF112;FYTTD1;GTF2A1;PRKAA1;GTF3C4;POLR2B;ZKSCAN8;TPR;ZNF548;NUP43;E2F5;ZNF587;TRDMT1;ZNF540;SUZ12;ZNF264;SMAD4;ZNF383;POU2F1;INTS3;INTS2;SMARCA5;UPF3A;ZNF33A;AGO3;CENPJ;AGO2;ZNF615;NUPL2;TNRC6A;EIF3A;TAF2
	Post-transcriptional silencing by small RNAs Homo sapiens R-HSA-426496	3/7	3.726296299257567E-4	0.11561521044578943	0	0	32.720424107142854	258.3253133007855	AGO3;AGO2;TNRC6A
	Nuclear Pore Complex (NPC) Disassembly Homo sapiens R-HSA-3301854	5/34	9.250001012173564E-4	0.11561521044578943	0	0	7.546002783361683	52.714237745191134	NEK9;NUP133;TPR;NUP43;NUPL2
	Assembly of the primary cilium Homo sapiens R-HSA-5617833	12/187	0.001140960165881418	0.11561521044578943	0	0	3.0262024080702896	20.505199867849537	PCM1;IFT172;CENPJ;WDR19;CCP110;NPHP3;HAUS3;CEP162;ASAP1;CLASP1;TTBK2;PAFAH1B1
	Transcriptional regulation by small RNAs Homo sapiens R-HSA-5578749	7/72	0.0011795946855698363	0.11561521044578943	0	0	4.725848925848926	31.86443517951197	NUP133;POLR2B;TPR;AGO2;NUP43;NUPL2;TNRC6A
	Membrane Trafficking Homo sapiens R-HSA-199991	20/420	0.0014665969047171117	0.11561521044578943	0	0	2.221461716937355	14.494616942223368	ANKRD28;SEC23A;SEC24B;STX16;SNAP23;RHOBTB3;AP4E1;LNPEP;MIA3;PIK3C2A;PUM1;DYNC1LI2;TBC1D4;MAN1A2;KIF5B;KIF21A;KIF1B;VAMP4;VPS36;PAFAH1B1
	Anchoring of the basal body to the plasma membrane Homo sapiens R-HSA-5620912	8/97	0.001576280098586611	0.11561521044578943	0	0	3.9485631673726127	25.478844492400476	PCM1;CENPJ;CCP110;HAUS3;CEP162;CLASP1;TTBK2;PAFAH1B1
	Generic Transcription Pathway Homo sapiens R-HSA-212436	32/812	0.001662487612280405	0.11561521044578943	0	0	1.8377333088550272	11.760464481050995	ZNF770;PRKAA1;CCNT1;RORA;NR3C1;ZFP30;POLR2B;ZNF606;SESN1;ZKSCAN8;ZNF548;E2F5;TEAD1;ZNF587;ZNF540;ZNF264;SMAD4;ZNF383;MED23;ZNF33A;AGO3;TBL1XR1;CENPJ;AGO2;ZNF615;PGR;ZNF799;ZNF555;ZNF234;TNRC6A;TAF2;ZNF112
	Chromatin organization Homo sapiens R-HSA-4839726	13/226	0.0019425325856284419	0.11561521044578943	0	0	2.6943640534225137	16.82296977904115	SUZ12;KMT2E;SETD2;PBRM1;JADE1;ELP2;ARID4B;AEBP2;TBL1XR1;KAT6B;ATXN7;CLOCK;KDM7A
	Chromatin modifying enzymes Homo sapiens R-HSA-3247509	13/226	0.0019425325856284419	0.11561521044578943	0	0	2.6943640534225137	16.82296977904115	SUZ12;KMT2E;SETD2;PBRM1;JADE1;ELP2;ARID4B;AEBP2;TBL1XR1;KAT6B;ATXN7;CLOCK;KDM7A
LF3	Term	Overlap	P-value	Adjusted P-value	Old P-value	Old Adjusted P-value	Odds Ratio	Combined Score	Genes
	Extracellular matrix organization Homo sapiens R-HSA-1474244	19/283	2.9710476026179593E-9	1.4231318016540024E-6	0	0	6.097710803689065	119.72459554647027	COLGALT2;COL13A1;COL14A1;ITGB4;ITGA3;ACTN1;SDC2;COL12A1;TNC;LAMB1;LTBP1;BMP2;ADAMTS2;MMP16;LOX;COL5A1;COL4A1;COL4A4;ITGA11
	Collagen formation Homo sapiens R-HSA-1474290	10/85	1.030934991408712E-7	2.4690893044238652E-5	0	0	10.976847977684798	176.59146336291872	COLGALT2;ADAMTS2;LOX;COL13A1;COL5A1;COL14A1;ITGB4;COL4A1;COL4A4;COL12A1
	Collagen biosynthesis and modifying enzymes Homo sapiens R-HSA-1650814	8/63	1.106515489847702E-6	1.766736398790164E-4	0	0	11.887438702376462	163.02783733812197	COLGALT2;ADAMTS2;COL13A1;COL5A1;COL14A1;COL4A1;COL4A4;COL12A1
	Syndecan interactions Homo sapiens R-HSA-3000170	4/20	9.712150255716129E-5	0.011630299931220063	0	0	20.137755102040817	186.06375003708527	ITGB4;ACTN1;SDC2;TNC
	Non-integrin membrane-ECM interactions Homo sapiens R-HSA-3000171	5/42	1.6779678808540654E-4	0.014804324247205444	0	0	10.918254319893665	94.90973063461566	ITGB4;SDC2;ACTN1;TNC;LAMB1
	Integrin cell surface interactions Homo sapiens R-HSA-216083	6/67	1.8544038723013084E-4	0.014804324247205444	0	0	7.970046549281522	68.48483339653868	COL13A1;ITGA3;COL4A1;COL4A4;ITGA11;TNC
	Assembly of collagen fibrils and other multimeric structures Homo sapiens R-HSA-2022090	5/54	5.525783090851462E-4	0.03781214429311215	0	0	8.239377718300435	61.80287520303092	LOX;COL5A1;ITGB4;COL4A1;COL4A4
	CRMPs in Sema3A signaling Homo sapiens R-HSA-399956	3/16	9.470066650242687E-4	0.05670202406832809	0	0	18.515947467166978	128.9118114216128	PLXNA2;CRMP1;PLXNA4
	Netrin-1 signaling Homo sapiens R-HSA-373752	4/42	0.0018106103222769435	0.09636470493007288	0	0	8.469602577873255	53.477843916796814	SLIT3;UNC5C;DOCK1;ROBO1
	Nephrin interactions Homo sapiens R-HSA-373753	3/22	0.002464660807094174	0.11805725265981093	0	0	12.664955070603337	76.06193440353556	KIRREL3;ACTN1;MAGI2
LF4	Term	Overlap	P-value	Adjusted P-value	Old P-value	Old Adjusted P-value	Odds Ratio	Combined Score	Genes
	COPI-mediated anterograde transport Homo sapiens R-HSA-6807878	2/78	0.0013254974295978832	0.10121651303726543	0	0	43.66228070175438	289.3048516583327	DYNC1I2;ANK2
	ER to Golgi Anterograde Transport Homo sapiens R-HSA-199977	2/131	0.003679706369849233	0.10121651303726543	0	0	25.655038759689923	143.79449938483123	DYNC1I2;ANK2
	Transport to the Golgi and subsequent modification Homo sapiens R-HSA-948021	2/162	0.0055662628224102725	0.10121651303726543	0	0	20.652083333333334	107.20561301190271	DYNC1I2;ANK2
	Heme biosynthesis Homo sapiens R-HSA-189451	1/11	0.007674930787541144	0.10121651303726543	0	0	153.66153846153847	748.3003458854362	FECH
	AMER1 mutants destabilize the destruction complex Homo sapiens R-HSA-4839748	1/14	0.009758590659951067	0.10121651303726543	0	0	118.18343195266272	547.1428779573204	PPP2R5E
	Truncations of AMER1 destabilize the destruction complex Homo sapiens R-HSA-5467348	1/14	0.009758590659951067	0.10121651303726543	0	0	118.18343195266272	547.1428779573204	PPP2R5E
	truncated APC mutants destabilize the destruction complex Homo sapiens R-HSA-4839744	1/14	0.009758590659951067	0.10121651303726543	0	0	118.18343195266272	547.1428779573204	PPP2R5E
	AXIN missense mutants destabilize the destruction complex Homo sapiens R-HSA-5467340	1/14	0.009758590659951067	0.10121651303726543	0	0	118.18343195266272	547.1428779573204	PPP2R5E
	AXIN mutants destabilize the destruction complex, activating WNT signaling Homo sapiens R-HSA-4839735	1/14	0.009758590659951067	0.10121651303726543	0	0	118.18343195266272	547.1428779573204	PPP2R5E
	APC truncation mutants have impaired AXIN binding Homo sapiens R-HSA-5467337	1/14	0.009758590659951067	0.10121651303726543	0	0	118.18343195266272	547.1428779573204	PPP2R5E
LF5	Term	Overlap	P-value	Adjusted P-value	Old P-value	Old Adjusted P-value	Odds Ratio	Combined Score	Genes
	Term	Overlap	P-value	Adjusted P-value	Old P-value	Old Adjusted P-value	Odds Ratio	Combined Score	Genes
	p38MAPK events Homo sapiens R-HSA-171007	6/13	5.153648480581085E-7	4.952656189838423E-4	0	0	31.589285714285715	457.3620219040853	MAPK11;MAPKAPK3;SRC;MAPKAPK2;RALGDS;MAPK12
	Signalling by NGF Homo sapiens R-HSA-166520	28/450	3.3372311027316707E-5	0.014963483480345197	0	0	2.4971994829814737	25.740592907847375	HDAC3;SRC;ADCY4;PSEN2;AP2A2;PSMD8;ABR;SYNGAP1;ERBB2;MLST8;PSMF1;RALGDS;AP2M1;ARHGEF11;MAP2K2;TSC2;MAPK12;VAV2;TNRC6C;MAPK11;PPP5C;ADCY9;MAPKAPK3;MAPKAPK2;RPS6KB2;RAPGEF1;ARHGEF2;FGFR1
	Transcriptional regulation of white adipocyte differentiation Homo sapiens R-HSA-381340	10/79	4.671222730596836E-5	0.014963483480345197	0	0	5.364808053988273	53.49520819318097	MED22;CCND3;MED24;SMARCD3;HDAC3;CARM1;SLC2A4;MED26;SREBF2;MED29
	Metabolism Homo sapiens R-HSA-1430728	78/1908	9.352135694514155E-5	0.022468506006070258	0	0	1.648461317227495	15.293304352940632	SLC44A2;MTMR14;TECR;INPPL1;ETFB;SLC2A4;ECSIT;NADSYN1;PIK3C2B;PSMD8;NDST1;GYS1;MT2A;NUP62;MLYCD;MAN2C1;TEAD2;ACOT8;GPX4;ABCC8;MED26;MED29;COASY;SREBF2;MED22;PLCB3;ADCY9;MED24;TST;MAPKAPK2;MVD;HAGH;MOCS1;SLC25A11;B4GALT7;PI4K2A;MGLL;PPARD;BCAT2;GCDH;VAC14;PDXK;ECHS1;SMARCD3;HDAC3;GALT;SDC3;ADCY4;AAAS;PLA2G6;ACACB;CYGB;SRM;PGS1;HMGCL;INPP5A;GNG7;PMVK;ST3GAL4;SCAP;INPP5K;PSMF1;CTSA;EEFSEC;GGT7;MMAB;M…
	Metabolism of lipids and lipoproteins Homo sapiens R-HSA-556833	34/659	2.0762715377648877E-4	0.03990593895584114	0	0	2.0499008	17.382680371361868	VAC14;ECHS1;SMARCD3;HDAC3;SLC44A2;MTMR14;TECR;INPPL1;PLA2G6;ACACB;PIK3C2B;PGS1;HMGCL;PMVK;SCAP;INPP5K;MLYCD;TEAD2;CTSA;ACOT8;GPX4;MED26;ACSF3;MED29;SREBF2;COQ6;MED22;MED24;CARM1;MAPKAPK2;MVD;PI4K2A;MGLL;PPARD
	Fatty acid, triacylglycerol, and ketone body metabolism Homo sapiens R-HSA-535734	16/217	2.520898911841012E-4	0.04037639757132021	0	0	2.960487139591617	24.52978178071936	ACOT8;ECHS1;SMARCD3;HDAC3;TECR;MED26;ACACB;ACSF3;SREBF2;MED29;MED22;HMGCL;MED24;CARM1;TEAD2;PPARD
	NGF signalling via TRKA from the plasma membrane Homo sapiens R-HSA-187037	22/374	4.928687231655409E-4	0.06766383470886926	0	0	2.333251953125	17.768338236910026	MAP2K2;SRC;ADCY4;TSC2;AP2A2;MAPK12;PSMD8;TNRC6C;MAPK11;PPP5C;SYNGAP1;ADCY9;MAPKAPK3;MAPKAPK2;ERBB2;RPS6KB2;RAPGEF1;MLST8;PSMF1;RALGDS;AP2M1;FGFR1
	Regulation of cholesterol biosynthesis by SREBP (SREBF) Homo sapiens R-HSA-1655829	7/55	6.221569342216576E-4	0.07473660172337662	0	0	5.37341872232764	39.66828678291508	SMARCD3;CARM1;PMVK;SCAP;MVD;ACACB;SREBF2
	Activation of gene expression by SREBF (SREBP) Homo sapiens R-HSA-2426168	6/42	8.164526223836896E-4	0.08717899667896951	0	0	6.133207070707071	43.61042446225393	SMARCD3;CARM1;PMVK;MVD;ACACB;SREBF2
	HIV Infection Homo sapiens R-HSA-162906	15/222	9.632645218933767E-4	0.0925697205539535	0	0	2.6889782469073746	18.67544465963858	VPS4A;HMGA1;AAAS;AP2A2;PSMD8;CDK9;PACS1;NUP62;ERCC2;POLR2E;AP1S1;PSMF1;CHMP7;VPS28;AP2M1

## Sheet: Reactome_DB_individual
This sheet lists the GO terms obtained for individual analysis of selected gene features and selected CpG features. Top 10 features are reported.
LF1
Gene
Term	Overlap	P-value	Adjusted P-value	Old P-value	Old Adjusted P-value	Odds Ratio	Combined Score	Genes
Immune System Homo sapiens R-HSA-168256	110/1547	1.497669410657852E-14	1.2445632802566752E-11	0	0	2.4685813161804813	78.58057444477748	CD86;RNF19B;UBE2L6;IFI35;TNF;KIF5C;C3AR1;FBXO4;HLA-DOB;TRIM21;PDIA3;TAP2;HLA-B;TAP1;HLA-A;HLA-F;NUP93;PSME1;PSME2;TRIM14;PRKCQ;CD300C;PSMD10;CSF1R;CFI;EBI3;CD1C;ANAPC10;C2;C3;RAP1A;PLCG2;NLRP3;HLA-DQA1;STAT5A;UBE2F;TNFSF15;CRTAM;NFKB1;CD209;TNFSF4;HLA-DRA;BLMH;HLA-DRB1;CD200;CD40;ITGAM;ARPC1B;ITGB2;IL24;KIF11;HMGB1;IFIH1;PSTPIP1;SUMO1;MRC1;CTLA4;TRIM69;FCER1A;RAC1;JAK3;CD33;CTSC;HLA-DPA1;HAVCR2;N…
Interferon gamma signaling Homo sapiens R-HSA-877300	21/93	2.599742589307079E-12	1.0801930458570912E-9	0	0	8.724184782608695	232.72293931213892	SP100;STAT1;HLA-B;HLA-A;HLA-F;SUMO1;OAS1;IRF1;IRF2;TRIM14;IRF8;HLA-DRA;IRF5;GBP2;TRIM21;IRF9;CD44;HLA-DQA1;PTPN2;HLA-DRB1;HLA-DPA1
Adaptive Immune System Homo sapiens R-HSA-1280218	63/762	2.6819178064506806E-11	7.428912323868385E-9	0	0	2.790098812256712	67.91631711735172	CD86;CD40;ITGB2;RNF19B;UBE2L6;KIF11;KIF5C;MRC1;FBXO4;CTLA4;TRIM69;RAC1;HLA-DOB;TRIM21;CD33;CTSC;HLA-DPA1;NCK1;PDIA3;SYK;RIPK2;TAP2;HLA-B;TAP1;HLA-A;DYNLL1;HLA-F;YWHAZ;ZAP70;PSMA3;PSMA1;PSMA2;PSME1;PSME2;PRKCQ;LCP2;CD300C;PSMD10;CD1C;ANAPC10;C3;HLA-DMA;HLA-DMB;RAP1A;PLCG2;HLA-DQA1;LAIR1;MICB;KLRG1;UBE2F;CRTAM;LILRB2;LILRB4;PSMB8;NFKB1;CD4;HLA-DRA;BLMH;SIGLEC1;CD247;FCGR2B;HLA-DRB1;CD200
Cytokine Signaling in Immune system Homo sapiens R-HSA-1280215	52/620	9.694243281937953E-10	2.0139790418226099E-7	0	0	2.8027824368724583	58.16983993235501	CD40;IL24;UBE2L6;IFI35;TNF;SUMO1;JAK3;TRIM21;HAVCR2;HLA-DPA1;SYK;RIPK2;HLA-B;IL18;HLA-A;HLA-F;YWHAZ;NUP93;PSMA3;PSMA1;OAS1;PSMA2;IRF1;IRF2;PSME1;PSME2;TRIM14;IRF8;IRF5;CD44;IRF9;PSMD10;CSF1R;SP100;EBI3;SAMHD1;RAP1A;GBP2;HLA-DQA1;STAT5A;IL32;STAT1;TNFSF15;PSMB8;NFKB1;CD4;TNFSF4;IL2RA;HLA-DRA;HLA-DRB1;PTPN2;IL18R1
Interferon Signaling Homo sapiens R-HSA-913531	26/196	1.9415706038563157E-9	3.2268903436091966E-7	0	0	4.587038571297064	92.01493230772935	SP100;UBE2L6;IFI35;SAMHD1;SUMO1;GBP2;TRIM21;HLA-DQA1;HLA-DPA1;STAT1;HLA-B;HLA-A;HLA-F;PSMB8;NUP93;OAS1;IRF1;IRF2;TRIM14;HLA-DRA;IRF8;IRF5;HLA-DRB1;CD44;IRF9;PTPN2
TCR signaling Homo sapiens R-HSA-202403	19/118	1.2076457162342064E-8	1.6725893169843758E-6	0	0	5.714795008912656	104.1921881420864	PSMD10;RIPK2;NFKB1;PSMB8;ZAP70;PSMA3;CD4;PSMA1;PSMA2;PSME1;PSME2;HLA-DRA;PRKCQ;LCP2;CD247;HLA-DQA1;HLA-DRB1;HLA-DPA1;NCK1
SRP-dependent cotranslational protein targeting to membrane Homo sapiens R-HSA-1799339	18/107	1.4379667447449812E-8	1.7070719498329704E-6	0	0	6.016150600003473	108.63634232770538	RPL5;RPS7;RPL31;RPL23;RPL22;RPL36A;RPS3A;RPL9;RPL7;RPS25;RPS17;SPCS2;RPS15A;SRP72;RPL17;SEC11A;RPS23;SEC11C
mRNA Splicing - Major Pathway Homo sapiens R-HSA-72163	20/134	1.902648324346524E-8	1.976375946914952E-6	0	0	5.228070175438597	92.94167235202957	SF3A3;DDX5;HNRNPA3;RBM8A;HNRNPL;LSM8;SNRNP40;LSM6;SNRPD1;PRPF3;TRA2B;CSTF1;HNRNPD;SRSF3;SNRPE;SNRPA1;POLR2G;SNRPB2;HNRNPA1;SRSF7
Translation Homo sapiens R-HSA-72766	21/151	3.013105182752734E-8	2.782100452075024E-6	0	0	4.8173076923076925	83.42473554769525	RPL5;RPS7;RPL31;RPL23;RPL22;RPL36A;RPS3A;RPL9;RPL7;EEF1B2;RPS25;RPS17;SPCS2;EIF2S3;RPS15A;SRP72;EIF3E;RPL17;SEC11A;RPS23;SEC11C
Interferon alpha/beta signaling Homo sapiens R-HSA-909733	14/68	4.1291511441916415E-8	3.4313246008232537E-6	0	0	7.678614097968937	130.5564723418873	STAT1;HLA-B;IFI35;HLA-A;HLA-F;SAMHD1;PSMB8;OAS1;IRF1;IRF2;IRF8;IRF5;GBP2;IRF9
CpG
Term	Overlap	P-value	Adjusted P-value	Old P-value	Old Adjusted P-value	Odds Ratio	Combined Score	Genes
Axon guidance Homo sapiens R-HSA-422475	274/515	7.938538314929639E-13	1.2011008470488545E-9	0	0	1.8915149057101448	52.70115572587221	EPHB6;TRIO;ITSN1;PITPNA;PSMD8;RPS6KA4;PSMD6;SYNGAP1;RPS6KA5;PSMD4;DPYSL4;PPP2R1B;DPYSL2;PSMD2;RPS6KA2;PSMD3;DPYSL3;KDR;PSMD1;EPHB2;EPHB1;EPHB4;EPHB3;SCN1A;EPHA4;CSNK2A1;UNC5A;UNC5B;ACTN2;ANK2;ANK3;FRS3;ANK1;TIAM1;PSME3;PSME4;PSME1;KCNQ3;TLN1;EPHA1;PFN1;EZR;MYL9;NGEF;EPHA2;SPTBN4;SPTBN5;EPHA10;SDC2;PDGFB;AGAP2;PDGFA;KALRN;NCSTN;GRIN2A;PSMF1;PIP5K1C;SPTBN1;SPTBN2;VASP;SIAH2;SIAH1;FN1;GRIN2C;GRIN2B;…
Signalling by NGF Homo sapiens R-HSA-166520	236/450	1.908642696940849E-10	1.4438882002357522E-7	0	0	1.829307384232515	40.93890881790882	TRIO;ITSN1;PSMD8;PSMD6;SYNGAP1;RPS6KA5;PSMD4;PPP2R1B;AKT2;PSMD2;RPS6KA2;AKT3;PSMD3;AKT1;PSMD1;PIP4K2A;PIP4K2C;PRKACA;ACTN2;PRKCE;OMG;PRKCA;FRS3;TIAM1;ADCY9;PRKAR1B;PSME3;PSME4;PSME1;TRIB3;TLN1;NGEF;SPTBN4;SPTBN5;PDE1C;PDE1B;MAPKAP1;PDGFB;PDGFA;PIK3R3;PIK3R1;KALRN;ABR;NCSTN;GRIN2A;PRKAR2B;PRKAR2A;CD19;PIP5K1A;PIP5K1B;PSMF1;PIP5K1C;RALGDS;SPTBN1;SPTBN2;NGFR;INSR;FN1;GRIN2C;GRIN2B;PTK2;GRIN2D;NET1;M…
Developmental Biology Homo sapiens R-HSA-1266738	382/786	3.5512424181181513E-10	1.7910099262042544E-7	0	0	1.5752953330576571	34.276147642034076	EPHB6;TRIO;ITSN1;PITPNA;RBPJ;PSMD8;RPS6KA4;PSMD6;SYNGAP1;RPS6KA5;PSMD4;DPYSL4;PPP2R1B;DPYSL2;AKT2;PSMD2;RPS6KA2;AKT3;PSMD3;DPYSL3;KDR;HOXA3;AKT1;PSMD1;HOXA2;HIST3H2BB;PKNOX1;EPHB2;EPHB1;EPHB4;EPHB3;SCN1A;HOXA4;EPHA4;MEF2B;CSNK2A1;UNC5A;UNC5B;ACTN2;MED8;EBF1;ANK2;ANK3;HNF1A;FRS3;ANK1;STX1B;TIAM1;PSME3;PSME4;PSME1;KCNQ3;HOXB4;HOXB3;HOXB2;EPHA1;TLN1;PFN1;EZR;MYL9;NGEF;EPHA2;SPTBN4;SPTBN5;EPHA10;EPAS…
Signaling by VEGF Homo sapiens R-HSA-194138	176/328	4.226188082376014E-9	1.5985556421587275E-6	0	0	1.9148295668349344	36.92167747899963	CYFIP2;IRS1;CTNND1;NCF4;IRS2;FGF1;FGF2;PSMD8;CDH5;PSMD6;SYNGAP1;PSMD4;PPP2R1B;FGF9;AKT2;PSMD2;AKT3;PSMD3;KDR;AKT1;PSMD1;NRTN;PRKACA;PDGFRB;MAP2K1;ACTN2;PRKCB;PRKCA;CYBA;FRS3;PGF;MAPKAPK3;PSME3;PSME4;MAPKAPK2;PSME1;ELMO1;TRIB3;TLN1;RAF1;VCL;SPTBN4;SPTBN5;PSMD11;SHC3;SHC1;SH2D2A;MAPKAP1;PXN;PDGFB;ITPR1;PDGFA;CSF2RB;ITPR3;PIK3R1;RASAL2;RASAL3;PRKCZ;RASGRP4;GRIN2A;RAP1A;UBB;THEM4;NCKAP1L;PSMF1;FGF23;…
Signaling by EGFR Homo sapiens R-HSA-177929	187/355	9.273804778378098E-9	2.0799750434073777E-6	0	0	1.8410733585517427	34.05262558414766	IRS1;IRS2;FGF1;FGF2;PSMD8;PSMD6;SYNGAP1;PSMD4;PPP2R1B;FGF9;AKT2;PSMD2;AKT3;PSMD3;AKT1;PSMD1;PIP4K2A;NRTN;PIP4K2C;PRKACA;AP2M1;PDGFRB;MAP2K1;ACTN2;PRKCE;TSC2;PRKCA;FRS3;ADCY9;PRKAR1B;HGS;PSME3;PSME4;ADAM12;PSME1;TRIB3;TLN1;RAF1;VCL;SPTBN4;SPTBN5;PSMD11;SHC3;PDE1C;PDE1B;SHC1;MAPKAP1;PXN;PDGFB;ITPR1;PDGFA;PIK3R3;CSF2RB;ITPR3;PIK3R1;RASAL2;RASAL3;FOXO3;RASGRP4;GRIN2A;RAP1A;UBB;PRKAR2B;CD19;PRKAR2A;PI…
Signaling by PDGF Homo sapiens R-HSA-186797	191/364	9.557570543165928E-9	2.0799750434073777E-6	0	0	1.8263473802480596	33.7252070241715	IRS1;IRS2;PLAT;FGF1;FGF2;PSMD8;PSMD6;SYNGAP1;PSMD4;PPP2R1B;FGF9;AKT2;PSMD2;AKT3;PSMD3;AKT1;PSMD1;PIP4K2A;NRTN;PIP4K2C;PRKACA;PDGFRB;MAP2K1;ACTN2;PRKCE;TSC2;PRKCA;FRS3;ADCY9;PRKAR1B;COL4A2;COL4A1;PSME3;COL4A4;PSME4;PSME1;TRIB3;TLN1;RAF1;VCL;GRB7;SPTBN4;SPTBN5;PSMD11;SHC3;PDE1C;PDE1B;SHC1;MAPKAP1;PDGFB;ITPR1;PDGFA;PIK3R3;CSF2RB;ITPR3;PIK3R1;RASAL2;RASAL3;FOXO3;RASGRP4;GRIN2A;RAP1A;UBB;PRKAR2B;CD19;…
Hemostasis Homo sapiens R-HSA-109582	274/552	9.623149572935654E-9	2.0799750434073777E-6	0	0	1.6347811975983124	30.176580167678342	APP;SPARC;SERPINE2;JMJD1C;F11R;ISLR;PPP2R1B;AKT2;AKT3;BSG;AKT1;KIF21B;PRKACA;PRKCH;PRKCB;ACTN2;PRKCE;ACTN1;SERPINF2;PRKCA;PRKAR1B;SERPING1;TLN1;PFN1;ZFPM2;TP53;ZFPM1;CFD;GRB7;STXBP3;PDE1B;PDGFB;GATA6;PDGFA;PIK3R3;GATA4;A1BG;GATA3;PIK3R1;GATA2;PRKCZ;PIK3R5;CYB5R1;PRKAR2B;PRKAR2A;KCNMB2;PLCG2;APOB;S100A10;CREBBP;PDE2A;FN1;IGF2;IGF1;GNG12;GNG11;PTK2;EHD1;EHD2;EHD3;CALU;MRVI1;GRB2;RCOR1;ECM1;HBB;HBD;…
VEGFA-VEGFR2 Pathway Homo sapiens R-HSA-4420097	170/320	1.977097957483233E-8	3.7391865120901644E-6	0	0	1.8730017522577167	33.2252729554112	CYFIP2;IRS1;CTNND1;NCF4;IRS2;FGF1;FGF2;PSMD8;CDH5;PSMD6;SYNGAP1;PSMD4;PPP2R1B;FGF9;AKT2;PSMD2;AKT3;PSMD3;KDR;AKT1;PSMD1;NRTN;PRKACA;PDGFRB;MAP2K1;ACTN2;PRKCB;PRKCA;CYBA;FRS3;MAPKAPK3;PSME3;PSME4;MAPKAPK2;PSME1;ELMO1;TRIB3;TLN1;RAF1;VCL;SPTBN4;SPTBN5;PSMD11;SHC3;SHC1;SH2D2A;MAPKAP1;PXN;PDGFB;ITPR1;PDGFA;CSF2RB;ITPR3;PIK3R1;RASAL2;RASAL3;PRKCZ;RASGRP4;GRIN2A;RAP1A;UBB;THEM4;NCKAP1L;PSMF1;FGF23;MARK…
Muscle contraction Homo sapiens R-HSA-397014	112/196	3.465637993015633E-8	5.826122537147392E-6	0	0	2.1982078373679284	37.76033942464767	SLC8A1;MYLK;SLC8A2;SLN;NPPA;PRKACA;SCN1A;TMOD1;KCNH2;TPM4;ACTN2;KCNK12;TMOD3;KCNK13;TPM1;CACNA2D3;CACNA2D2;CACNA2D4;ATP1B1;MYL4;CACNB1;MYL5;CACNB2;CACNB3;MYL7;CACNB4;MYL2;KCNQ1;SCN8A;MYL3;TLN1;MYL9;VCL;KCNE1;KCNE2;KCNE3;KCNE4;PXN;ITPR1;GATA4;CACNA1D;ITPR3;CACNA1C;CALD1;MYH11;WWTR1;DMPK;CAV3;FXYD3;FXYD2;FXYD1;FXYD7;FGF12;FGF11;SCN2B;RYR1;KCNK5;RYR2;TRIM72;KCNK7;KCNK9;ITGB5;LMOD1;DYSF;ATP2A3;ATP2A2…
Signaling by FGFR1 Homo sapiens R-HSA-5654736	176/336	4.221972429936618E-8	6.387844286494104E-6	0	0	1.8179009847565089	30.868646477906772	IRS1;IRS2;FGF1;FGF2;FGFRL1;PSMD8;PSMD6;SYNGAP1;PSMD4;PPP2R1B;FGF9;AKT2;PSMD2;AKT3;PSMD3;AKT1;PSMD1;PIP4K2A;NRTN;PIP4K2C;PRKACA;PDGFRB;MAP2K1;ACTN2;PRKCE;TSC2;PRKCA;FRS3;ADCY9;PRKAR1B;PSME3;PSME4;PSME1;TRIB3;TLN1;RAF1;VCL;SPTBN4;SPTBN5;PSMD11;SHC3;PDE1C;PDE1B;SHC1;MAPKAP1;PDGFB;ITPR1;PDGFA;PIK3R3;CSF2RB;ITPR3;PIK3R1;RASAL2;RASAL3;FOXO3;RASGRP4;GRIN2A;RAP1A;FLRT2;UBB;PRKAR2B;CD19;PRKAR2A;FLRT1;PIP5…
LF2
Gene
Term	Overlap	P-value	Adjusted P-value	Old P-value	Old Adjusted P-value	Odds Ratio	Combined Score	Genes
Gene Expression Homo sapiens R-HSA-74160	160/1631	2.08444850532741E-11	2.0156617046516055E-8	0	0	1.8812581082874484	46.267533441301744	ATF2;EIF4A1;ZNF175;CCNT1;ICE2;HNRNPU;RORA;ARID4B;NR3C1;CCAR1;ZFP30;ZNF606;SESN1;ZNF605;PAPOLA;ZNF569;ZNF721;ZNF441;ZNF320;ZNF440;ZNF561;ZNF680;TYW5;EIF1AX;THOC1;DICER1;THOC2;SRRM1;DDX39B;XRN1;TBL1XR1;KIAA1456;TFAM;PGR;ZNF799;SRSF5;ZNF677;SRSF6;ZNF555;ZNF432;ZNF431;ZNF154;ZNF550;ZNF274;DDX5;ZNF791;ZNF23;RNPC3;ZNF25;RPAP2;ZNF767P;ZKSCAN8;TPR;ZNF548;ZNF667;ZNF546;RPRD1A;ZNF302;ZKSCAN1;ZNF662;BARD1;Z…
Generic Transcription Pathway Homo sapiens R-HSA-212436	90/812	2.5752991297965827E-9	1.2451571292566478E-6	0	0	2.102400222844674	41.57980022720757	ATF2;ZNF770;ZNF175;DYRK2;CCNT1;CHD9;ZNF43;CHM;RORA;BRCA1;NR3C1;MED13;ZFP30;ZNF606;SESN1;ZNF528;ZNF605;ZNF41;ZNF569;ZNF248;ZNF721;TEAD1;ZNF441;ZNF320;ZNF440;ZNF561;ZNF680;RMI1;MED23;PPM1A;TBL1XR1;ZNF799;PGR;ZNF677;ZNF555;ZNF234;ZNF432;ZNF431;ZNF112;ZNF154;ZNF550;ZNF274;PRKAA1;ZNF791;ZNF471;PRKAA2;ZNF23;NR2C2;ZNF25;NR2C1;ZNF767P;POLR2B;ZKSCAN8;ZNF548;RICTOR;ZNF667;ZNF546;ZNF347;ZNF621;E2F5;ZNF302;Z…
Processing of Capped Intron-Containing Pre-mRNA Homo sapiens R-HSA-72203	29/193	2.4988059733385985E-6	7.929356571467821E-4	0	0	2.9090362093048245	37.525687264494636	FYTTD1;DDX5;SRSF1;HNRNPU;RNPC3;CCAR1;PCF11;POLR2B;TPR;PAPOLA;NUP43;SF3B1;RBM5;NDC1;RANBP2;NCBP1;NUP133;FUS;CPSF2;THOC1;THOC2;SRRM1;NUDT21;DDX39B;HNRNPH1;HNRNPH2;SRSF5;NUPL2;SRSF6
Transport of Mature Transcript to Cytoplasm Homo sapiens R-HSA-72202	16/74	4.277970188498876E-6	7.929356571467821E-4	0	0	4.512315270935961	55.781385393862216	NDC1;FYTTD1;RANBP2;NCBP1;NUP133;SRSF1;CPSF2;THOC1;THOC2;SRRM1;DDX39B;TPR;NUP43;SRSF5;SRSF6;NUPL2
mRNA 3'-end processing Homo sapiens R-HSA-72187	13/51	4.919973053651182E-6	7.929356571467821E-4	0	0	5.587223924276373	68.28821017591545	FYTTD1;NCBP1;SRSF1;CPSF2;THOC1;THOC2;SRRM1;NUDT21;DDX39B;PCF11;PAPOLA;SRSF5;SRSF6
Post-Elongation Processing of Intron-Containing pre-mRNA Homo sapiens R-HSA-112296	13/51	4.919973053651182E-6	7.929356571467821E-4	0	0	5.587223924276373	68.28821017591545	FYTTD1;NCBP1;SRSF1;CPSF2;THOC1;THOC2;SRRM1;NUDT21;DDX39B;PCF11;PAPOLA;SRSF5;SRSF6
Transport of Mature mRNA derived from an Intron-Containing Transcript Homo sapiens R-HSA-159236	15/68	6.536585367100187E-6	9.029825785694115E-4	0	0	4.626582590275383	55.23258546742022	NDC1;FYTTD1;RANBP2;NCBP1;NUP133;SRSF1;THOC1;THOC2;SRRM1;DDX39B;TPR;NUP43;SRSF5;SRSF6;NUPL2
SUMOylation of DNA damage response and repair proteins Homo sapiens R-HSA-3108214	15/75	2.2906336204316263E-5	0.002640619785633465	0	0	4.085291557876414	43.647651259375245	NDC1;RANBP2;NUP133;BRCA1;SMC1A;PHC3;PIAS2;PIAS1;RAD52;STAG1;RAD21;TDG;TPR;NUP43;NUPL2
Cleavage of Growing Transcript in the Termination Region Homo sapiens R-HSA-109688	13/60	3.275070989034474E-5	0.002640619785633465	0	0	4.51516719965987	46.62626203080055	FYTTD1;NCBP1;SRSF1;CPSF2;THOC1;THOC2;SRRM1;NUDT21;DDX39B;PCF11;PAPOLA;SRSF5;SRSF6
RNA Polymerase II Transcription Termination Homo sapiens R-HSA-73856	13/60	3.275070989034474E-5	0.002640619785633465	0	0	4.51516719965987	46.62626203080055	FYTTD1;NCBP1;SRSF1;CPSF2;THOC1;THOC2;SRRM1;NUDT21;DDX39B;PCF11;PAPOLA;SRSF5;SRSF6
CpG
Term	Overlap	P-value	Adjusted P-value	Old P-value	Old Adjusted P-value	Odds Ratio	Combined Score	Genes
Axon guidance Homo sapiens R-HSA-422475	252/515	1.423181604809738E-7	2.146157860053085E-4	0	0	1.5923767375179205	25.104138887084193	EPHB6;TRIO;ITSN1;PSMD8;RPS6KA4;PSMD6;PSMD7;SYNGAP1;RPS6KA5;DPYSL4;PSMD5;SCN11A;DPYSL2;RPS6KA2;DPYSL3;RPS6KA1;PSMD1;EPHB2;EPHB4;EPHB3;SCN1A;EPHA6;CSNK2A1;UNC5A;UNC5B;ACTN2;PAQR3;ANK2;ANK3;ANK1;PSME3;PRKCQ;MYL9;EPHA3;PFN2;SDC2;PDGFB;AGAP2;PDGFA;KALRN;NCSTN;GRIN2A;APH1B;PSMF1;PIP5K1C;SPTBN1;SPTBN2;LYN;SIAH2;RDX;SIAH1;FN1;BRAF;GRIN2C;GRIN2B;PTK2;ARTN;COL9A1;COL9A3;GRB2;RET;ROBO2;NRP1;ROBO3;NRP2;CLTA;…
Beta-catenin independent WNT signaling Homo sapiens R-HSA-3858494	81/144	5.392823732774393E-6	0.003817812204789401	0	0	2.1222609989129815	25.74396273925217	CLTA;AP2A1;ARRB2;AP2A2;PSMD8;PPP3CA;PSMD6;PPP3CB;PSMD7;GNAT2;PSMD5;PSMD1;RAC3;MAP3K7;AP2M1;WNT5B;PRKCB;WNT5A;PRKCA;AXIN2;RHOA;DAAM1;PSMA1;PSME3;ROR1;ROR2;PLCB1;PLCB2;PSMD14;PSMD13;TCF7;LEF1;CAMK2A;ITPR1;ITPR2;ITPR3;PRICKLE1;NLK;PSMB10;PSMB6;PSMB4;PARD6A;GNG2;WNT11;PSMB5;PSMB2;GNG7;DVL1;DVL2;DVL3;GNG8;PDE6B;PSMF1;RPS27A;WNT4;TCF7L2;TCF7L1;SMURF1;RYK;PDE6G;FZD6;FZD8;NFATC1;GNG12;GNAO1;TNRC6C;MOV10;…
O-glycosylation of TSR domain-containing proteins Homo sapiens R-HSA-5173214	28/38	7.72362764444662E-6	0.003817812204789401	0	0	4.609013785790032	54.253744763241606	SEMA5A;SEMA5B;SPON2;THSD7B;ADAMTS12;THBS2;THSD1;THSD4;ADAMTSL1;ADAMTS16;ADAMTS4;ADAMTS5;ADAMTS15;ADAMTS14;POFUT2;ADAMTS2;ADAMTS13;ADAMTSL5;ADAMTSL4;ADAMTS19;ADAMTSL3;ADAMTS17;THSD7A;ADAMTS9;ADAMTS6;ADAMTS7;SBSPON;SSPO
Ca2+ pathway Homo sapiens R-HSA-4086398	40/61	1.0404951791895245E-5	0.003817812204789401	0	0	3.1375970462534455	35.99836857830642	LEF1;TCF7;CAMK2A;ITPR1;ITPR2;ITPR3;NLK;PPP3CA;PPP3CB;GNG2;WNT11;GNAT2;GNG7;GNG8;PDE6B;MAP3K7;TCF7L2;TCF7L1;PDE6G;WNT5A;FZD6;PRKCA;NFATC1;AXIN2;GNG12;GNAO1;TNRC6C;MOV10;AGO3;AGO1;GNB2;AGO2;GNB1;GNB4;CTNNB1;GNB5;PLCB1;PLCB2;TNRC6A;TNRC6B
Signaling by FGFR Homo sapiens R-HSA-190236	178/366	1.455833780502302E-5	0.003817812204789401	0	0	1.5673432743052158	17.456045417919647	KLB;CD86;AHCYL1;IRS1;IRS2;FGF1;FGFRL1;TIAL1;PSMD8;PSMD6;PSMD7;SYNGAP1;PSMD5;AKT2;AKT3;AKT1;PSMD1;PIP4K2A;NRTN;PIP4K2C;PDGFRB;PDGFRA;ACTN2;PRKCE;PAQR3;TSC2;PRKCA;GTF2F1;GTF2F2;ADCY9;PRKAR1B;PSME3;TRIB3;RAF1;VCL;SHC2;SHC3;PDE1C;PSMD14;PSMD13;PDGFB;ITPR1;PDGFA;ITPR2;ITPR3;RASAL2;FOXO1;RASGRP4;GRIN2A;FLRT2;PRKAR2B;CD19;FLRT1;PIP5K1B;PSMF1;PIP5K1C;FGF23;SPTBN1;SPTBN2;KL;PSPN;FN1;BRAF;GRIN2C;GRIN2B;PTK…
Defective B3GALTL causes Peters-plus syndrome (PpS) Homo sapiens R-HSA-5083635	27/37	1.5190234236562603E-5	0.003817812204789401	0	0	4.443817097415507	49.30351887848854	SEMA5A;SEMA5B;SPON2;THSD7B;ADAMTS12;THBS2;THSD1;THSD4;ADAMTSL1;ADAMTS16;ADAMTS4;ADAMTS5;ADAMTS15;ADAMTS14;ADAMTS2;ADAMTS13;ADAMTSL5;ADAMTSL4;ADAMTS19;ADAMTSL3;ADAMTS17;THSD7A;ADAMTS9;ADAMTS6;ADAMTS7;SBSPON;SSPO
Signalling by NGF Homo sapiens R-HSA-166520	213/450	2.125539597748012E-5	0.004072634012137002	0	0	1.4888528814282347	16.01841891831564	ATF1;TRIO;AHCYL1;ITSN1;PSMD8;PSMD6;PSMD7;SYNGAP1;RPS6KA5;PSMD5;AKT2;RPS6KA2;AKT3;RPS6KA1;AKT1;PSMD1;PIP4K2A;PIP4K2C;MEF2C;ACTN2;PRKCE;PAQR3;PRKCA;TIAM2;ADCY9;PRKAR1B;PSME3;TRIB3;PDE1C;PDGFB;PDGFA;KALRN;ABR;NCSTN;GRIN2A;APH1B;PRKAR2B;CD19;PIP5K1B;PSMF1;PIP5K1C;RALGDS;SPTBN1;SPTBN2;FN1;BRAF;GRIN2C;GRIN2B;PTK2;MOV10;AGO3;ARTN;AGO1;AGO2;GRB2;RET;CLTA;AP2A1;PCSK6;PCSK5;AP2A2;SMPD2;AKAP13;PEA15;JAK3;HR…
Signaling by FGFR2 Homo sapiens R-HSA-5654738	175/361	2.160548547552786E-5	0.004072634012137002	0	0	1.5571192040946562	16.72745164415182	KLB;CD86;AHCYL1;IRS1;IRS2;FGF1;TIAL1;PSMD8;PSMD6;PSMD7;SYNGAP1;PSMD5;AKT2;AKT3;AKT1;PSMD1;PIP4K2A;NRTN;PIP4K2C;PDGFRB;PDGFRA;ACTN2;PRKCE;PAQR3;TSC2;PRKCA;GTF2F1;GTF2F2;ADCY9;PRKAR1B;PSME3;TRIB3;RAF1;VCL;SHC2;SHC3;PDE1C;PSMD14;PSMD13;PDGFB;ITPR1;PDGFA;ITPR2;ITPR3;RASAL2;FOXO1;RASGRP4;GRIN2A;PRKAR2B;CD19;PIP5K1B;PSMF1;PIP5K1C;FGF23;SPTBN1;SPTBN2;KL;PSPN;FN1;BRAF;GRIN2C;GRIN2B;PTK2;FGF17;MOV10;NR4A1…
Signaling by VEGF Homo sapiens R-HSA-194138	160/328	3.1427033272377355E-5	0.005265774019416116	0	0	1.5753090226916455	16.33255521101067	KLB;NCKAP1;AHCYL1;NCF2;IRS1;CTNND1;NCF4;IRS2;FGF1;PSMD8;CDH5;PSMD6;PSMD7;SYNGAP1;PSMD5;AKT2;AKT3;AKT1;PSMD1;NRTN;PDGFRB;PDGFRA;ACTN2;PRKCB;PAQR3;PRKCA;MAPKAPK3;PSME3;ELMO1;TRIB3;RAF1;VCL;SHC2;SHC3;PSMD14;PSMD13;SH2D2A;PDGFB;ITPR1;PDGFA;ITPR2;ITPR3;RASAL2;PRKCZ;RASGRP4;GRIN2A;PSMF1;FGF23;SPTBN1;SPTBN2;KL;JUP;PSPN;FN1;BRAF;GRIN2C;GRIN2B;PTK2;FGF17;ARTN;PTPRA;DLG4;FGF18;NF1;GRB2;FGFR4;FGFR3;MAP3K11;…
Signaling by PDGF Homo sapiens R-HSA-186797	175/364	3.8696144366630416E-5	0.005672587570184938	0	0	1.532027498635583	15.56504792625384	KLB;CD86;AHCYL1;IRS1;IRS2;FGF1;PSMD8;PSMD6;PSMD7;SYNGAP1;PSMD5;AKT2;AKT3;AKT1;PSMD1;PIP4K2A;NRTN;PIP4K2C;PDGFRB;PDGFRA;ACTN2;PRKCE;PAQR3;TSC2;PRKCA;ADCY9;PRKAR1B;COL4A2;COL4A1;PSME3;COL4A4;TRIB3;RAF1;VCL;GRB7;SHC2;SHC3;PDE1C;PSMD14;PSMD13;PDGFB;ITPR1;PDGFA;ITPR2;ITPR3;RASAL2;FOXO1;RASGRP4;GRIN2A;PRKAR2B;CD19;PDGFD;PDGFC;PIP5K1B;PSMF1;PIP5K1C;FGF23;SPTBN1;SPTBN2;STAT5B;KL;PSPN;FN1;BRAF;GRIN2C;GRIN…
LF3
Gene
Term	Overlap	P-value	Adjusted P-value	Old P-value	Old Adjusted P-value	Odds Ratio	Combined Score	Genes
Collagen formation Homo sapiens R-HSA-1474290	22/85	1.9313995741050017E-15	9.504977847927033E-13	0	0	12.226642555756479	414.245148089025	COLGALT2;COL15A1;COL13A1;COL24A1;COL14A1;ITGB4;COL12A1;LAMA3;ADAMTS2;COL3A1;ADAMTS3;COL1A2;LOX;COL5A1;COL4A1;COL4A4;COL4A3;COL5A2;SERPINH1;COL4A5;COL6A3;COLGALT1
Extracellular matrix organization Homo sapiens R-HSA-1474244	38/283	2.4185694269534435E-15	9.504977847927033E-13	0	0	5.539771215748869	186.44432510057044	COLGALT2;COL15A1;COL13A1;COL14A1;ITGB4;SDC2;ITGB3;COL12A1;LAMA3;TNC;LTBP1;ADAMTS2;ADAMTS3;SERPINH1;COLGALT1;COL24A1;TGFB3;ITGA3;ACTN1;FN1;CASK;LAMB1;COL3A1;BMP2;COL1A2;MMP16;LOX;COL5A1;COL4A1;COL4A4;ITGA10;COL4A3;COL5A2;ITGA11;COL4A5;COL6A3;DDR2;FBN1
Collagen biosynthesis and modifying enzymes Homo sapiens R-HSA-1650814	19/63	7.292931946383499E-15	1.9107481699524767E-12	0	0	15.052280902550686	489.97990231681985	COLGALT2;COL15A1;COL13A1;COL24A1;COL14A1;COL12A1;ADAMTS2;COL3A1;ADAMTS3;COL1A2;COL5A1;COL4A1;COL4A4;COL4A3;COL5A2;SERPINH1;COL4A5;COL6A3;COLGALT1
Assembly of collagen fibrils and other multimeric structures Homo sapiens R-HSA-2022090	14/54	2.537025291758943E-10	4.9852546983063226E-8	0	0	12.094028520499108	267.21585103489326	COL15A1;COL24A1;ITGB4;LAMA3;COL3A1;COL1A2;LOX;COL5A1;COL4A1;COL4A4;COL4A3;COL5A2;COL4A5;COL6A3
Non-integrin membrane-ECM interactions Homo sapiens R-HSA-3000171	9/42	2.409041382315509E-6	3.7870130529999796E-4	0	0	9.344041117892708	120.87714770878995	ITGB4;SDC2;ITGB3;ACTN1;LAMA3;TNC;CASK;LAMB1;DDR2
Integrin cell surface interactions Homo sapiens R-HSA-216083	11/67	3.010959738760306E-6	3.944357257776001E-4	0	0	6.745789007092198	85.76091342692823	COL13A1;ITGA3;COL4A1;ITGB3;COL4A4;ITGA10;COL4A3;ITGA11;TNC;FN1;FBN1
Syndecan interactions Homo sapiens R-HSA-3000170	6/20	1.5117306006854245E-5	0.0016974575030553481	0	0	14.620386643233743	162.2814725276624	ITGB4;ITGB3;ACTN1;SDC2;TNC;CASK
Platelet activation, signaling and aggregation Homo sapiens R-HSA-76002	20/253	4.667785554080356E-5	0.004586099306883949	0	0	2.968255809457526	29.600161364881945	APP;WDR1;TGFB3;SRC;ACTN1;APLP2;ITGB3;PRKCD;F2R;FN1;ITPR1;PIK3R3;ITPR2;PLA2G4A;GP5;VAV2;AKT3;TIMP3;CD9;DGKI
Axon guidance Homo sapiens R-HSA-422475	31/515	9.612021362493984E-5	0.008394498656578079	0	0	2.2300794543023823	20.628036307115053	SHC3;SRC;ITGB3;SDC2;ITSN1;CRMP1;NTN1;ROBO1;CLTCL1;PLXNA2;SLIT3;SPTAN1;MYH10;PLXNA4;PDGFRB;EPHA4;UNC5B;FN1;UNC5C;LAMB1;VAV2;FGF17;COL4A1;ITGA10;COL4A4;COL4A3;COL4A5;COL6A3;MYH9;DOCK1;EPHA3
Netrin mediated repulsion signals Homo sapiens R-HSA-418886	4/10	1.2367090179953903E-4	0.009720532881443767	0	0	22.672504378283712	204.00462193386124	SRC;UNC5B;UNC5C;NTN1
CpG
Term	Overlap	P-value	Adjusted P-value	Old P-value	Old Adjusted P-value	Odds Ratio	Combined Score	Genes
Muscle contraction Homo sapiens R-HSA-397014	108/196	1.8727720311110914E-8	2.8166491347910815E-5	0	0	2.2339789233836513	39.74977014415443	AHCYL1;SLC8A1;MYLK;NPPC;SLN;SCN9A;NPPA;PRKACA;SCN1B;SCN1A;TMOD1;KCNH2;TPM4;ACTN2;CACNA2D1;TPM1;CACNA2D3;CACNA2D4;KCNK17;ATP1B2;ATP1B1;MYL4;CACNB1;MYL5;CACNB2;MYL7;CACNB4;STIM1;MYL2;KCNQ1;SCN8A;MYL3;MYL9;KCNE1;KCNE4;NPR1;PXN;ITPR1;GATA4;CACNA1D;ITPR3;CACNA1C;CALD1;CACNA1S;NKX2-5;WWTR1;DMPK;NEB;FGF14;FXYD2;FXYD6;CALM1;FGF11;SCN2B;RYR1;RYR2;KCNK6;KCNK7;KCNK9;ITGB5;LMOD1;DYSF;ATP2A3;ATP2A2;RYR3;ANXA6…
Signalling by NGF Homo sapiens R-HSA-166520	211/450	4.7658600503267146E-7	3.5839267578456895E-4	0	0	1.6116805279985196	23.460617198897214	TRIO;AHCYL1;SYNGAP1;RPS6KA5;AKT2;RPS6KA2;AKT3;AKT1;PSMD1;PIP4K2A;PIP4K2C;PRKACA;MEF2A;MEF2C;ACTN2;PRKCE;FRS2;PRKCA;FRS3;TIAM2;ADCY9;PRKAR1B;PSME3;PSME1;TRIB3;UBA52;NGEF;SPTBN4;ADCYAP1R1;SPTBN5;PDE1C;PDE1B;PDE1A;PDGFB;PDGFA;PIK3R3;PIK3R1;KALRN;APH1A;ABR;GRIN2A;PRKAR2B;CD19;PIP5K1B;PIP5K1C;RALGDS;SPTBN1;SPTBN2;NGFR;BRAF;GRIN2C;PTK2;GRIN2D;AGO2;CD28;CALM1;RET;PCSK6;PCSK5;AP2A2;IKBKB;AKAP13;JAK2;JAK3…
Axon guidance Homo sapiens R-HSA-422475	236/515	9.549494246795257E-7	3.876936083044252E-4	0	0	1.5448870920950428	21.414618434955297	EPHB6;TRIO;PITPNA;RPS6KA4;ALCAM;SYNGAP1;RPS6KA5;DPYSL4;DPYSL2;RPS6KA2;DPYSL3;KDR;PSMD1;EPHB2;EPHB4;SCN1B;SCN1A;UNC5A;ACTN2;FRS2;UNC5C;ANK2;ANK3;FRS3;ANK1;PSME3;PSME1;EPHA1;PFN1;MYL9;UBA52;NGEF;EPHA3;EPHA2;PFN2;SPTBN4;SPTBN5;EPHA10;SDC2;PDGFB;AGAP2;PDGFA;KALRN;APH1A;GRIN2A;PIP5K1C;SPTBN1;SPTBN2;VASP;ST8SIA2;SIAH1;BRAF;GRIN2C;PTK2;GRIN2D;COL9A1;COL9A3;COL9A2;CALM1;SCN2B;RET;ROBO2;NRP1;NRP2;ARPC1B;A…
Developmental Biology Homo sapiens R-HSA-1266738	344/786	1.0311000220862373E-6	3.876936083044252E-4	0	0	1.4253567032471697	19.648377301785484	EPHB6;TRIO;PITPNA;RBPJ;RPS6KA4;SYNGAP1;ALCAM;RPS6KA5;DPYSL4;DPYSL2;AKT2;RPS6KA2;AKT3;DPYSL3;KDR;HOXA3;AKT1;PSMD1;HIST3H2BB;EPHB2;EPHB4;SCN1B;SCN1A;HOXA4;MEF2A;MEF2C;MEF2B;UNC5A;ACTN2;EBF1;MED9;FRS2;UNC5C;ANK2;ANK3;FRS3;ANK1;MED6;STX1B;PSME3;PSME1;HOXB4;HOXB3;HOXB2;EPHA1;PFN1;MYL9;UBA52;NGEF;EPHA3;EPHA2;PFN2;SPTBN4;SPTBN5;PAXIP1;EPHA10;SDC2;PDGFB;GATA6;AGAP2;PDGFA;KALRN;APH1A;GRIN2A;PIP5K1C;PPARGC…
Cardiac conduction Homo sapiens R-HSA-5576891	75/135	1.7403548724970748E-6	5.234987456471202E-4	0	0	2.269666902905741	30.099009499942795	RYR1;KCNK6;RYR2;KCNK7;AHCYL1;KCNK9;ATP2A3;ATP2A2;SLC8A1;RYR3;NPPC;SLN;SCN9A;NPPA;SCN5A;PRKACA;SCN1B;SCN1A;KCNH2;KCND3;CACNA2D1;CACNA2D3;CACNA2D4;ATP1B2;KCNK17;ATP1B1;TRDN;CACNB1;CACNB2;CACNB4;STIM1;ASPH;SCN8A;KCNQ1;CAMK2B;KCNE1;CAMK2D;KCNE4;NPR1;CAMK2A;ITPR1;ATP1A4;CACNA1D;GATA4;ITPR3;ATP1A2;CACNA1C;ATP1A1;SRI;TNNI3;CACNA1S;NKX2-5;KCNJ2;CORIN;KCNJ4;WWTR1;DMPK;KCNIP1;KCNIP2;KCNIP3;KCNIP4;KCNJ14;AT…
NGF signalling via TRKA from the plasma membrane Homo sapiens R-HSA-187037	175/374	5.112480606467558E-6	0.001281528472021201	0	0	1.6021336011473615	19.520116752703697	CD86;AHCYL1;ITGA2B;PEBP1;IRS2;FGF1;RPS6KA5;SYNGAP1;AKT2;RPS6KA2;AKT3;AKT1;PSMD1;PIP4K2A;NRTN;PIP4K2C;PRKACA;AP2M1;MEF2A;MEF2C;MAP2K2;ACTN2;PRKCE;TSC2;FRS2;PRKCA;FRS3;ADCY9;PRKAR1B;MAPKAPK3;PSME3;MAPKAPK2;PSME1;TRIB3;RAF1;UBA52;SPTBN4;ADCYAP1R1;SPTBN5;SHC2;PDE1C;PSMD14;PDE1B;PDE1A;PDGFB;ITPR1;PDGFA;PIK3R3;CSF2RB;ITPR3;PIK3R1;RASAL2;RASAL3;FOXO3;RASGRP1;FOXO1;RASGRP3;GRIN2A;PRKAR2B;CD19;PIP5K1B;PIP…
Signaling by PDGF Homo sapiens R-HSA-186797	169/364	1.2822708127557123E-5	0.0027550504319779874	0	0	1.5780778623760954	17.775931239318595	CD86;AHCYL1;ITGA2B;PEBP1;IRS2;PLAT;FGF1;SYNGAP1;AKT2;AKT3;AKT1;PSMD1;PIP4K2A;NRTN;PIP4K2C;PRKACA;MAP2K2;ACTN2;PRKCE;TSC2;FRS2;PRKCA;FRS3;ADCY9;PRKAR1B;COL4A2;COL4A1;PSME3;COL4A4;PSME1;TRIB3;RAF1;UBA52;SPTBN4;SPTBN5;SHC2;PDE1C;PSMD14;PDE1B;PDE1A;PDGFB;ITPR1;PDGFA;PIK3R3;CSF2RB;ITPR3;PIK3R1;RASAL2;RASAL3;FOXO3;RASGRP1;FOXO1;RASGRP3;GRIN2A;PRKAR2B;CD19;PDGFD;PDGFC;PIP5K1B;PIP5K1C;SPTBN1;SPTBN2;STAT5…
Signaling by EGFR Homo sapiens R-HSA-177929	165/355	1.4976276338768302E-5	0.002815539951688441	0	0	1.5809876449918767	17.563260025207818	CD86;AHCYL1;ITGA2B;PEBP1;IRS2;FGF1;SYNGAP1;AKT2;AKT3;AKT1;PSMD1;PIP4K2A;NRTN;PIP4K2C;PRKACA;AP2M1;MAP2K2;ACTN2;PRKCE;TSC2;FRS2;PRKCA;FRS3;ADAM17;ADCY9;PRKAR1B;HGS;PSME3;ADAM12;PSME1;TRIB3;RAF1;UBA52;SPTBN4;SPTBN5;SHC2;PDE1C;PSMD14;PDE1B;PDE1A;PXN;PDGFB;ITPR1;PDGFA;PIK3R3;CSF2RB;ITPR3;PIK3R1;RASAL2;RASAL3;FOXO3;RASGRP1;FOXO1;RASGRP3;GRIN2A;PRKAR2B;CD19;PIP5K1B;PIP5K1C;SPTBN1;SPTBN2;KL;BRAF;GRIN2C;…
Signaling by FGFR1 Homo sapiens R-HSA-5654736	156/336	2.7071064514780148E-5	0.004523875670025482	0	0	1.5770002867794666	16.585383187013615	CD86;AHCYL1;ITGA2B;PEBP1;IRS2;FGF1;FGFRL1;SYNGAP1;AKT2;AKT3;AKT1;PSMD1;PIP4K2A;NRTN;PIP4K2C;PRKACA;MAP2K2;ACTN2;PRKCE;TSC2;FRS2;PRKCA;FRS3;ADCY9;PRKAR1B;PSME3;PSME1;TRIB3;RAF1;UBA52;SPTBN4;SPTBN5;SHC2;PDE1C;PSMD14;PDE1B;PDE1A;PDGFB;ITPR1;PDGFA;PIK3R3;CSF2RB;ITPR3;PIK3R1;RASAL2;RASAL3;FOXO3;RASGRP1;FOXO1;RASGRP3;GRIN2A;FLRT2;PRKAR2B;CD19;FLRT1;PIP5K1B;PIP5K1C;SPTBN1;SPTBN2;KL;BRAF;GRIN2C;PTK2;GRIN…
Signaling by FGFR4 Homo sapiens R-HSA-5654743	153/332	5.143453500391234E-5	0.007168990492663889	0	0	1.5547677404528686	15.353643515989608	CD86;AHCYL1;ITGA2B;PEBP1;IRS2;FGF1;SYNGAP1;AKT2;AKT3;AKT1;PSMD1;PIP4K2A;NRTN;PIP4K2C;PRKACA;MAP2K2;ACTN2;PRKCE;TSC2;FRS2;PRKCA;FRS3;ADCY9;PRKAR1B;PSME3;PSME1;TRIB3;RAF1;UBA52;SPTBN4;SPTBN5;SHC2;PDE1C;PSMD14;PDE1B;PDE1A;PDGFB;ITPR1;PDGFA;PIK3R3;CSF2RB;ITPR3;PIK3R1;RASAL2;RASAL3;FOXO3;RASGRP1;FOXO1;RASGRP3;GRIN2A;PRKAR2B;CD19;PIP5K1B;PIP5K1C;SPTBN1;SPTBN2;KL;BRAF;GRIN2C;PTK2;GRIN2D;NR4A1;GDNF;DLG4;…
LF4
Gene
Term	Overlap	P-value	Adjusted P-value	Old P-value	Old Adjusted P-value	Odds Ratio	Combined Score	Genes
Citric acid cycle (TCA cycle) Homo sapiens R-HSA-71403	2/19	6.857960874714185E-4	0.14153861701894266	0	0	60.15686274509804	438.2385475331956	NNT;SDHC
Membrane Trafficking Homo sapiens R-HSA-199991	5/420	0.001603900660236482	0.14153861701894266	0	0	6.540829986613119	42.092312470722504	DYNC1I2;PRKAG1;EXOC4;NAA35;ANK2
Vesicle-mediated transport Homo sapiens R-HSA-5653656	5/492	0.003187348286831747	0.14153861701894266	0	0	5.5532740132329454	31.923361991890058	DYNC1I2;PRKAG1;EXOC4;NAA35;ANK2
Regulation of TP53 Activity Homo sapiens R-HSA-5633007	3/151	0.003644978041505624	0.14153861701894266	0	0	10.567745376955903	59.33160182598408	USP7;CSNK2A1;PRKAG1
The citric acid (TCA) cycle and respiratory electron transport Homo sapiens R-HSA-1428517	3/153	0.003782025638239298	0.14153861701894266	0	0	10.42578947368421	58.14979418361582	NNT;SDHC;NDUFS1
Pyruvate metabolism and Citric Acid (TCA) cycle Homo sapiens R-HSA-71406	2/48	0.0043570418553784355	0.14153861701894266	0	0	22.199554069119287	120.67593068115895	NNT;SDHC
Organelle biogenesis and maintenance Homo sapiens R-HSA-1852241	4/326	0.004364626956531271	0.14153861701894266	0	0	6.592915897263723	35.82737227716515	DYNC1I2;GFM1;PRKAG1;EXOC4
Transcriptional Regulation by TP53 Homo sapiens R-HSA-3700989	4/348	0.005493736705764432	0.15588477902606576	0	0	6.16436203645506	32.080243834388995	CNOT4;USP7;CSNK2A1;PRKAG1
Translocation of GLUT4 to the plasma membrane Homo sapiens R-HSA-1445148	2/60	0.006731643132587706	0.1600767472913847	0	0	17.595932802829356	87.99613406532231	PRKAG1;EXOC4
Signaling by TGF-beta Receptor Complex Homo sapiens R-HSA-170834	2/73	0.009828533928940142	0.1600767472913847	0	0	14.364752618273744	66.40057337209727	ZFYVE9;PARD3
CpG
Term	Overlap	P-value	Adjusted P-value	Old P-value	Old Adjusted P-value	Odds Ratio	Combined Score	Genes
Hemostasis Homo sapiens R-HSA-109582	274/552	1.9768926336130935E-10	2.99696923255745E-7	0	0	1.7290425979567572	38.63428922016136	APP;SPARC;SERPINE2;SERPINE1;AKT2;AKT3;AKT1;KIF21A;KIF21B;PRKCH;PRKCB;ACTN2;PRKCE;ACTN1;PRKCA;ACTN4;PRKAR1B;PRKCQ;TP53;ZFPM1;CFD;GRB7;GATA6;PDGFA;GATA4;A1BG;GATA3;PIK3R1;PRKCZ;PIK3R5;RACGAP1;PRKAR2B;KCNMB1;INPP5D;PLCG2;PLCG1;APOB;S100A10;LYN;CREBBP;PDE2A;FN1;IGF2;PPBP;IGF1;GNG12;PTK2;EHD1;EHD2;TF;CALU;MRVI1;GRB2;RCOR1;SERPINA1;KIF11;SLC7A11;SLC7A10;SERPINA5;GNGT2;C1QBP;KIF13B;TIMP3;QSOX1;KIF1A;RAC…
Extracellular matrix organization Homo sapiens R-HSA-1474244	150/283	1.2962210300029997E-8	9.825355407422737E-6	0	0	1.9671307705589653	35.72550966811077	SPARC;COL16A1;SERPINE1;COL12A1;ITGA2B;LOXL3;ICAM3;LOXL4;PLOD3;ICAM5;PLOD1;FGF2;CAPN15;LOXL1;ICAM1;CAPN8;CAPN9;DAG1;CAPN2;CAPN3;CAPN1;CAST;COL27A1;PHYKPL;ACTN1;COL23A1;PRKCA;PCOLCE;HSPG2;BCAN;ADAM17;ADAM15;COL4A2;LOX;COL4A1;COL4A4;COL4A3;COL8A2;COL8A1;ADAM9;ADAM8;FBN2;COL17A1;FBN3;COL13A1;SDC2;LTBP4;HTRA1;PDGFA;LTBP2;LTBP3;NID1;FBLN2;LTBP1;FBLN5;ADAMTS16;ADAMTS14;SERPINH1;ELANE;TGFB2;VCAM1;FN1;GDF…
Axon guidance Homo sapiens R-HSA-422475	248/515	4.480123546022526E-8	2.2639557652567164E-5	0	0	1.6249111497604147	27.49517050850614	EPHB6;TRIO;PITPNA;RPS6KA4;SYNGAP1;RPS6KA5;DPYSL4;PSMD5;SCN11A;DPYSL2;RPS6KA2;DPYSL3;RPS6KA1;EPHB2;EPHB1;EPHB4;EPHB3;EPHA4;UNC5A;UNC5B;ACTN2;FRS2;UNC5C;ANK2;ANK3;FRS3;ANK1;TIAM1;PSME3;PSME4;PSME1;KCNQ3;PSME2;PRKCQ;EPHA1;NGEF;EPHA3;EPHA2;SPTBN4;SPTBN5;EPHA10;SDC2;AGAP2;PDGFA;KALRN;GRIN2A;ST8SIA4;PLCG1;PSMF1;PIP5K1C;SCN3B;SPTBN1;SPTBN2;LYN;ST8SIA2;SIAH2;SIAH1;FN1;GRIN2C;GRIN2B;PTK2;GRIN2D;COL9A3;GRB…
Platelet activation, signaling and aggregation Homo sapiens R-HSA-76002	129/253	2.0655038184034037E-6	7.8282594717489E-4	0	0	1.8105308748086273	23.700096074076615	DGKG;APP;SPARC;DGKD;DGKA;SERPINE1;ITGA2B;MPL;CLU;ABHD12;POTEKP;AKT2;AKT3;CFL1;AKT1;PRKCH;ACTN2;PRKCB;ACTN1;PRKCE;APLP2;F2R;PRKCA;ACTN4;DGKZ;TUBA4A;TMX3;DGKQ;PRKCQ;RAF1;PPIA;DGKI;DGKH;CFD;PDGFA;ITPR2;ITPR3;PIK3R1;A1BG;RASGRP2;PRKCZ;RASGRP1;PIK3R5;RAP1A;THPO;TBXA2R;PSAP;PLCG2;LYN;TGFB2;BRPF3;IGF2;FN1;PPBP;IGF1;GNG12;PTK2;TF;GNAQ;GNB1;CALU;GNB4;GRB2;GNB5;LAT;LGALS3BP;SERPINA1;DAGLA;WDR1;ITGB3;PLEK;P…
Degradation of the extracellular matrix Homo sapiens R-HSA-1474228	62/106	3.891607440197768E-6	0.0010604835532654622	0	0	2.4452270539854757	30.459431141271715	COL18A1;COL16A1;COL12A1;LAMC2;LAMC1;CAPN15;CTSS;ADAMTS4;ADAMTS5;CAPN8;MMP25;CAPN9;ADAMTS1;CTSK;CAPN2;TIMP2;CAPN3;CAPN1;ADAMTS8;CTSD;ADAMTS9;CTSB;CAST;PHYKPL;COL25A1;MMP1;MMP2;COL23A1;HSPG2;DCN;BCAN;MMP11;ADAM17;ADAM15;MMP17;ADAM9;MMP19;ADAM8;CD44;COL17A1;LAMA5;COL15A1;COL13A1;LAMA3;HTRA1;FURIN;NID1;COL19A1;ADAMTS16;ACAN;SPP1;ELANE;LAMB3;LAMB1;CAPN14;CAPN11;BMP1;CAPN12;CAPN10;TLL2;COL9A3;COL9A2
G alpha (12/13) signalling events Homo sapiens R-HSA-416482	47/75	4.197164458834283E-6	0.0010604835532654622	0	0	2.9105525717421985	36.03584649028592	TRIO;ROCK2;RASGRF2;ADRA1D;PIK3R1;ADRA1B;KALRN;FGD2;CDC42;GNA13;AKAP13;ABR;GNGT2;GNG2;TBXA2R;MCF2L;GNG7;GNA12;GNG8;RAC1;ECT2;VAV3;ARHGEF11;ARHGEF12;PLEKHG5;ARHGEF17;ARHGEF16;ARHGEF18;RHOC;GNG12;RHOA;VAV1;VAV2;TIAM2;TIAM1;OBSCN;GNB1;ARHGEF3;GNB4;ARHGEF4;ARHGEF1;PLXNB1;ARHGEF2;GNB5;ARHGEF7;SOS1;NGEF
Rho GTPase cycle Homo sapiens R-HSA-194840	69/122	5.893885948226922E-6	0.0012764472996445735	0	0	2.2597572565944253	27.211081737186248	ARHGAP9;TRIO;RASGRF2;FAM13A;GDI2;ARHGDIG;ARHGAP1;ARHGAP39;ARHGAP44;AKAP13;ARHGDIA;MCF2L;ARHGDIB;TAGAP;RAC3;RAC1;ARHGEF11;VAV3;ARHGEF12;ARHGEF17;PLEKHG5;ARHGEF16;ARHGEF18;RHOH;ARAP3;RHOF;GMIP;RHOC;RHOD;RHOA;VAV1;VAV2;BCR;TIAM2;TIAM1;OBSCN;RHOJ;ARHGEF3;ARHGEF4;ARHGEF2;ARHGEF7;SOS1;NGEF;RHOQ;ARHGAP15;KALRN;RHOBTB1;RHOBTB2;FGD2;ARHGAP22;CDC42;ABR;ARHGAP20;RHOT2;RACGAP1;CHN2;SRGAP3;ECT2;SRGAP1;STARD13…
Signalling by NGF Homo sapiens R-HSA-166520	208/450	1.6945170828402657E-5	0.0032111098719823034	0	0	1.4981927647973543	16.458438075087813	TRIO;CRKL;SYNGAP1;RPS6KA5;PSMD5;AKT2;RPS6KA2;AKT3;RPS6KA1;AKT1;PIP4K2A;ACTN2;PRKCE;FRS2;PRKCA;FRS3;TIAM2;TIAM1;ADCY9;PRKAR1B;PSME3;PSME4;PSME1;PSME2;NGEF;SPTBN4;ADCYAP1R1;SPTBN5;PDE1C;PDGFA;PIK3R1;KALRN;ABR;GRIN2A;PRKAR2B;CD19;PLCG1;PSMF1;PIP5K1C;RALGDS;SPTBN1;SPTBN2;NGFR;FN1;GRIN2C;GRIN2B;PTK2;GRIN2D;MOV10;AGO2;CD28;GRB2;CDKN1A;CLTA;AP2A1;PCSK6;PCSK5;AP2A2;IKBKB;AKAP13;RAC1;JAK3;HRAS;DUSP4;PSENE…
EPH-Ephrin signaling Homo sapiens R-HSA-2682334	55/95	2.0266950344715048E-5	0.003413855191398668	0	0	2.384529532967033	25.768463848300257	EPHB6;ARPC1B;ARPC1A;CLTB;CLTA;AP2A1;SHB;AP2A2;CFL1;NCK2;RAC1;EPHB2;EPHB1;HRAS;EPHB4;GIT1;AP2M1;EPHB3;PSENEN;VAV3;EPHA4;HSP90AA1;MMP2;RHOA;VAV2;TIAM1;MYH9;EPHA1;ARHGEF7;NGEF;EPHA3;EPHA2;EPHA10;ROCK2;SRC;SDC2;KALRN;EFNA4;EFNB2;CDC42;AP2S1;MYH14;MYH11;FYN;PAK2;MYH10;LYN;ARPC4;AP2B1;GRIN2B;PTK2;VEGFA;EFNA1;EFNA3;ARPC2
Developmental Biology Homo sapiens R-HSA-1266738	343/786	2.515672764459641E-5	0.003638264035422966	0	0	1.3534158354468957	14.333195028305434	EPHB6;TRIO;PITPNA;RBPJ;RPS6KA4;SYNGAP1;RPS6KA5;DPYSL4;PSMD5;SCN11A;DPYSL2;AKT2;RPS6KA2;AKT3;DPYSL3;RPS6KA1;AKT1;EPHB2;EPHB1;EPHB4;EPHB3;EPHA4;MED1;MEF2B;UNC5A;UNC5B;ACTN2;EBF1;FRS2;UNC5C;ANK2;ANK3;HNF1A;FRS3;ANK1;STX1B;TIAM1;PSME3;PSME4;PSME1;KCNQ3;PSME2;PRKCQ;EPHA1;NGEF;EPHA3;EPHA2;SPTBN4;SPTBN5;PAXIP1;EPHA10;EPAS1;SDC2;GATA6;AGAP2;PDGFA;KALRN;HELZ2;GRIN2A;ST8SIA4;PSMF1;PIP5K1C;PLCG1;SCN3B;SPTBN…
LF5
Genes
Term	Overlap	P-value	Adjusted P-value	Old P-value	Old Adjusted P-value	Odds Ratio	Combined Score	Genes
p38MAPK events Homo sapiens R-HSA-171007	7/13	1.2290510714520573E-6	0.0013593304850259755	0	0	21.627240143369175	294.3309109519709	MAPK11;MAPKAPK3;SRC;MAPKAPK2;HRAS;RALGDS;MAPK12
Nef-mediates down modulation of cell surface receptors by recruiting them to clathrin adapters Homo sapiens R-HSA-164938	8/21	5.371516529755038E-6	0.002970448640954536	0	0	11.414722264037332	138.51080905440648	ARF1;PACS1;AP1B1;AP2S1;AP1S1;AP2A2;AP2M1;AP1M1
HIV Infection Homo sapiens R-HSA-162906	27/222	3.070668252941942E-5	0.011320530292512626	0	0	2.5918398650203236	26.931886453775	ARF1;VPS4A;AAAS;AP2A2;PSMD8;PSMD9;PSMD3;NUP62;AP2S1;POLR2E;AP1S1;PSMF1;POLR2I;AP2M1;AP1M1;TAF10;AP1B1;HMGA1;GTF2F1;SUPT5H;RANGAP1;CDK9;PACS1;ERCC2;TAF6;CHMP7;VPS28
The role of Nef in HIV-1 replication and disease pathogenesis Homo sapiens R-HSA-164952	8/28	5.943474835128934E-5	0.016433707919131502	0	0	7.416829745596869	72.17043725318547	ARF1;PACS1;AP2S1;AP1B1;AP1S1;AP2A2;AP2M1;AP1M1
Chromatin organization Homo sapiens R-HSA-4839726	25/226	2.704154049610507E-4	0.04984657298115368	0	0	2.322838543600406	19.083399087436224	PHF2;KMT2D;KDM5C;SMARCB1;SMARCD3;HDAC3;EHMT2;JADE2;RUVBL2;WDR5;KAT8;HIST3H2BB;DMAP1;ATXN7L3;PRMT7;KDM2A;BRPF1;PRMT1;BRPF3;MCRS1;TAF10;TADA2B;MRGBP;CARM1;TADA3
Chromatin modifying enzymes Homo sapiens R-HSA-3247509	25/226	2.704154049610507E-4	0.04984657298115368	0	0	2.322838543600406	19.083399087436224	PHF2;KMT2D;KDM5C;SMARCB1;SMARCD3;HDAC3;EHMT2;JADE2;RUVBL2;WDR5;KAT8;HIST3H2BB;DMAP1;ATXN7L3;PRMT7;KDM2A;BRPF1;PRMT1;BRPF3;MCRS1;TAF10;TADA2B;MRGBP;CARM1;TADA3
Host Interactions of HIV factors Homo sapiens R-HSA-162909	17/129	3.382365130902477E-4	0.05248629044724107	0	0	2.8256416584402766	22.581864572764772	ARF1;AP1B1;HMGA1;AAAS;RANGAP1;AP2A2;PSMD8;CDK9;PSMD9;PACS1;PSMD3;NUP62;AP2S1;AP1S1;PSMF1;AP2M1;AP1M1
Mitochondrial protein import Homo sapiens R-HSA-1268020	10/54	3.796476705044562E-4	0.05248629044724107	0	0	4.217023172905526	33.21440011015151	TOMM40;IDH3G;TIMM17B;PMPCA;CYC1;TAZ;BCS1L;GFER;TOMM5;TIMM50
Signalling by NGF Homo sapiens R-HSA-166520	40/450	5.757543896905505E-4	0.07075381722197209	0	0	1.8290219265829022	13.644191532009584	HDAC3;SRC;ARAF;PDGFB;ADCY4;PSEN2;PEBP1;ELK1;AP2A2;PSMD8;PSMD9;ABR;SYNGAP1;PPP2R1A;AKT2;PSMD3;ERBB2;AP2S1;MLST8;PSMF1;RALGDS;HRAS;AP2M1;ARHGEF11;MAP2K2;TSC2;MAPK12;DUSP7;VAV2;TNRC6C;MAPK11;PPP5C;ADCY9;MAPKAPK3;MAPKAPK2;RPS6KB2;RAPGEF1;ARHGEF2;TLN1;FGFR1
Nef Mediated CD4 Down-regulation Homo sapiens R-HSA-167590	4/9	7.153131342941084E-4	0.0742587110698686	0	0	14.787524366471734	107.1029359882228	ARF1;AP2S1;AP2A2;AP2M1
CpG
Term	Overlap	P-value	Adjusted P-value	Old P-value	Old Adjusted P-value	Odds Ratio	Combined Score	Genes
Axon guidance Homo sapiens R-HSA-422475	269/515	1.4129749783091148E-9	2.140657092138309E-6	0	0	1.7092886339281703	34.83114612432683	TRIO;PITPNA;WDR83;ACTB;PSMD8;ALCAM;SYNGAP1;DPYSL4;PPP2R1B;PSMD5;SCN11A;DPYSL2;PSMD2;RPS6KA2;RPS6KA1;EPHB2;EPHB1;SCN1B;EPHB3;EPHA4;EPHA6;UNC5A;UNC5B;ACTN2;PAQR3;FRS2;UNC5C;ANK3;FRS3;ANK1;TIAM1;PSME3;PSME4;PSME1;PSME2;EPHA1;PFN1;MYL9;UBA52;NGEF;EPHA3;EPHA2;SPTBN4;SPTBN5;EPHA10;SDC2;AGAP2;PDGFA;KALRN;NCSTN;GRIN2A;APH1B;RRAS;PSMF1;PIP5K1C;SCN3B;SPTBN1;SPTBN2;LYN;BRAP;ST8SIA2;RDX;FN1;GRIN2B;PTK2;GRIN2…
Signalling by NGF Homo sapiens R-HSA-166520	231/450	1.2937512976221954E-7	9.80016607948813E-5	0	0	1.6443197303306318	26.079814756161927	TRIO;AHCYL1;WDR83;PSMD8;SYNGAP1;PPP2R1B;PSMD5;PSMD2;RPS6KA2;AKT3;RPS6KA1;AKT1;PIP4K2A;PIP4K2C;PRKACA;ACTN2;PRKCE;PAQR3;OMG;FRS2;PRKCA;FRS3;TIAM2;TIAM1;ADCY9;PRKAR1B;PSME3;PSME4;PSME1;PSME2;UBA52;NGEF;SPTBN4;SPTBN5;PDE1C;MAPKAP1;PDGFA;PIK3R3;PIK3R1;KALRN;ABR;NCSTN;GRIN2A;APH1B;PRKAR2B;CD19;PSMF1;PIP5K1C;RALGDS;SPTBN1;SPTBN2;BRAP;NGFR;INSR;FN1;GRIN2B;PTK2;GRIN2D;PPP5C;AGO4;AGO2;GRB2;CALM1;CDKN1A;CD…
Developmental Biology Homo sapiens R-HSA-1266738	377/786	3.564841857751129E-7	1.80024513816432E-4	0	0	1.4415574839659828	21.40276930616197	TRIO;PITPNA;WDR83;RBPJ;ACTB;PSMD8;SYNGAP1;ALCAM;DPYSL4;PPP2R1B;PSMD5;SCN11A;DPYSL2;PSMD2;RPS6KA2;AKT3;RPS6KA1;HOXA3;AKT1;EPHB2;EPHB1;SCN1B;EPHB3;CDON;EPHA4;MED1;MEF2B;EPHA6;UNC5A;UNC5B;ACTN2;PAQR3;MED8;EBF1;FRS2;UNC5C;ANK3;HNF1A;FRS3;ANK1;MED7;STX1B;TIAM1;PSME3;PSME4;PSME1;PSME2;HOXB3;EPHA1;PFN1;MYL9;UBA52;NGEF;EPHA3;EPHA2;SPTBN4;SPTBN5;EPHA10;EPAS1;SDC2;AGAP2;PDGFA;KALRN;HELZ2;GRIN2A;NCSTN;APH1B…
Signaling by VEGF Homo sapiens R-HSA-194138	170/328	2.666995911691883E-6	9.266516344723954E-4	0	0	1.672534719311482	21.466243603927268	CYFIP2;AHCYL1;NCF2;IRS1;ITGA2B;NCF4;WDR83;PSMD8;FGF7;SYNGAP1;PPP2R1B;FGF9;PSMD5;PSMD2;AKT3;AKT1;NRTN;PRKACA;PDGFRB;MAP2K1;MAP2K2;ACTN2;PRKCB;PAQR3;FRS2;PRKCA;CYBA;FRS3;RBX1;MAPKAPK3;PSME3;PSME4;MAPKAPK2;PSME1;ELMO1;PSME2;ELMO2;UBA52;SPTBN4;SPTBN5;SHC2;PSMD13;SHC1;SH2D2A;MAPKAP1;PXN;ITPR1;PDGFA;ITPR2;ITPR3;PIK3R1;RASAL2;RASAL3;PRKCZ;RAP1B;GRIN2A;RAP1A;UBC;NCKAP1L;PSMF1;FGF23;MARK3;SPTBN1;SPTBN2;BR…
Signaling by PDGF Homo sapiens R-HSA-186797	186/364	3.058256219380843E-6	9.266516344723954E-4	0	0	1.6249998172421103	20.633704388895584	AHCYL1;IRS1;CD80;ITGA2B;WDR83;PLAT;PSMD8;FGF7;SYNGAP1;PPP2R1B;FGF9;PSMD5;PSMD2;AKT3;AKT1;PIP4K2A;NRTN;PIP4K2C;PRKACA;PDGFRB;MAP2K1;MAP2K2;ACTN2;PRKCE;PAQR3;TSC2;FRS2;PRKCA;FRS3;RBX1;ADCY9;PRKAR1B;COL4A2;COL4A1;PSME3;PSME4;PSME1;PSME2;UBA52;SPTBN4;SPTBN5;SHC2;PDE1C;PSMD13;SHC1;MAPKAP1;ITPR1;PDGFA;PIK3R3;ITPR2;ITPR3;PIK3R1;RASAL2;RASAL3;FOXO3;FOXO1;RAP1B;GRIN2A;RAP1A;PRKAR2B;CD19;PDGFD;UBC;PSMF1;PI…
VEGFA-VEGFR2 Pathway Homo sapiens R-HSA-4420097	164/320	9.197633951275142E-6	0.0018391916410421597	0	0	1.6331906059426495	18.93939985342329	CYFIP2;AHCYL1;NCF2;IRS1;ITGA2B;NCF4;WDR83;PSMD8;FGF7;SYNGAP1;PPP2R1B;FGF9;PSMD5;PSMD2;AKT3;AKT1;NRTN;PRKACA;PDGFRB;MAP2K1;MAP2K2;ACTN2;PRKCB;PAQR3;FRS2;PRKCA;CYBA;FRS3;RBX1;MAPKAPK3;PSME3;PSME4;MAPKAPK2;PSME1;ELMO1;PSME2;ELMO2;UBA52;SPTBN4;SPTBN5;SHC2;PSMD13;SHC1;SH2D2A;MAPKAP1;PXN;ITPR1;PDGFA;ITPR2;ITPR3;PIK3R1;RASAL2;RASAL3;PRKCZ;RAP1B;GRIN2A;RAP1A;UBC;NCKAP1L;PSMF1;FGF23;MARK3;SPTBN1;SPTBN2;BR…
NGF signalling via TRKA from the plasma membrane Homo sapiens R-HSA-187037	188/374	1.0188589710494959E-5	0.0018391916410421597	0	0	1.5711856507664597	18.05958828486148	AHCYL1;IRS1;CD80;ITGA2B;WDR83;PSMD8;FGF7;SYNGAP1;PPP2R1B;FGF9;PSMD5;PSMD2;RPS6KA2;AKT3;RPS6KA1;AKT1;PIP4K2A;NRTN;PIP4K2C;PRKACA;SH3GL2;AP2M1;PDGFRB;MAP2K1;MAP2K2;ACTN2;PRKCE;PAQR3;TSC2;FRS2;PRKCA;FRS3;RBX1;ADCY9;PRKAR1B;MAPKAPK3;PSME3;PSME4;MAPKAPK2;PSME1;PSME2;UBA52;SPTBN4;SPTBN5;SHC2;PDE1C;PSMD13;SHC1;MAPKAP1;ITPR1;PDGFA;PIK3R3;ITPR2;ITPR3;PIK3R1;RASAL2;RASAL3;FOXO3;FOXO1;RAP1B;GRIN2A;RAP1A;PRK…
Downstream signal transduction Homo sapiens R-HSA-186763	173/341	1.1454244284827595E-5	0.0018391916410421597	0	0	1.6000236610622425	18.203709542261404	AHCYL1;IRS1;CD80;ITGA2B;WDR83;PSMD8;FGF7;SYNGAP1;PPP2R1B;FGF9;PSMD5;PSMD2;AKT3;AKT1;PIP4K2A;NRTN;PIP4K2C;PRKACA;PDGFRB;MAP2K1;MAP2K2;ACTN2;PRKCE;PAQR3;TSC2;FRS2;PRKCA;FRS3;RBX1;ADCY9;PRKAR1B;PSME3;PSME4;PSME1;PSME2;UBA52;SPTBN4;SPTBN5;SHC2;PDE1C;PSMD13;SHC1;MAPKAP1;ITPR1;PDGFA;PIK3R3;ITPR2;ITPR3;PIK3R1;RASAL2;RASAL3;FOXO3;FOXO1;RAP1B;GRIN2A;RAP1A;PRKAR2B;CD19;UBC;PSMF1;PIP5K1C;FGF23;MARK3;SPTBN1;…
Semaphorin interactions Homo sapiens R-HSA-373755	44/67	1.158480923301292E-5	0.0018391916410421597	0	0	2.9588992395331655	33.63030392535864	SEMA5A;ITGB1;GSK3B;NRP1;SEMA7A;HSP90AB1;PLXND1;ROCK1;CRMP1;TREM2;SEMA3E;ARHGAP35;PAK1;DPYSL4;RRAS;DPYSL2;CFL1;ERBB2;RAC2;PLXNA2;MYH14;PLXNA1;FYN;PLXNC1;RAC1;PIP5K1C;MYH10;PLXNA4;ARHGEF11;FARP2;SEMA4A;ARHGEF12;SEMA6A;CD72;SEMA4D;SEMA6D;LIMK2;RHOG;RHOA;PTPRC;FES;PLXNB1;MYL9;MET
Diseases of signal transduction Homo sapiens R-HSA-5663202	149/288	1.213987881876013E-5	0.0018391916410421597	0	0	1.6644120600955132	18.839504665560767	MAML2;ZFYVE9;MAML1;IRS1;CD80;HDAC11;RBPJ;PSMD8;FGF7;PPP2R1B;FGF9;PSMD5;PSMD2;AKT3;AKT1;SKP1;PDGFRB;RNF43;TSC2;FRS2;GTF2F2;DKK2;RBX1;TBL1XR1;PSME3;PSME4;PSME1;PSME2;MAML3;UBA52;VCP;NOTCH1;CTBP2;DHH;CTBP1;PSMD13;SHC1;TNKS;MAPKAP1;SEL1L;PSEN2;PDGFA;PIK3R3;PIK3R1;FOXO3;FOXO1;NCSTN;APH1B;CD19;UBC;PSMF1;FGF23;JAG2;STAT5A;SMAD2;STAT5B;KL;CREBBP;SMAD4;TGFB1;CPSF6;SMAD3;FZD5;FGF17;NR4A1;FGF18;NAPEPLD;GRB2…

## Sheet: GO_terms_LF1
First 20 GO terms for gene and CpG features are listed
	Gene features ontology									CpG features ontology
	category	over_represented_pvalue	under_represented_pvalue	numDEInCat	numInCat	term	ontology	padj		ONTOLOGY		TERM	NumInCategory	DE	P	FDR
	GO:0006955	1.7925e-25	1	149	1710	immune response	BP	3.97434e-21		GO:0015629	CC	actin cytoskeleton	502	260,0000	4,420821e-11	1.01162e-06
	GO:0002376	6.01543e-20	1	176	2509	immune system process	BP	6.6687e-16		GO:0003779	MF	actin binding	428	228,0000	2,841880e-10	2.4018e-06
	GO:0050776	1.29312e-19	1	90	877	regulation of immune response	BP	9.55703e-16		GO:0030029	BP	actin filament-based process	750	364,0000	3,148801e-10	2.4018e-06
	GO:0002250	3.25246e-19	1	54	359	adaptive immune response	BP	1.80284e-15		GO:0030036	BP	actin cytoskeleton organization	658	323,5000	8,195051e-10	4.68818e-06
	GO:0002684	7.85157e-18	1	90	936	positive regulation of immune system process	BP	3.4817e-14		GO:0071944	CC	cell periphery	5326	1935.32	1,197033e-09	5.04025e-06
	GO:0050778	2.55137e-17	1	74	688	positive regulation of immune response	BP	9.42816e-14		GO:0005886	CC	plasma membrane	5209	1891.32	1,321572e-09	5.04025e-06
	GO:0002682	3.87473e-17	1	111	1341	regulation of immune system process	BP	1.22729e-13		GO:0044459	CC	plasma membrane part	2769	1091.32	4,473559e-09	1.46241e-05
	GO:1903037	1.12974e-15	1	42	271	regulation of leukocyte cell-cell adhesion	BP	3.13109e-12		GO:0030054	CC	cell junction	1288	580,1529	8,899056e-09	2.54546e-05
	GO:0007159	1.88896e-15	1	44	300	leukocyte cell-cell adhesion	BP	4.65355e-12		GO:0005911	CC	cell-cell junction	454	222,1529	4,430589e-08	0.00011265
	GO:0006952	2.37419e-15	1	106	1326	defense response	BP	5.26405e-12		GO:0009653	BP	anatomical structure morphogenesis	2710	1114.83	1,204104e-07	0.000259579
	GO:0019221	3.05308e-15	1	69	673	cytokine-mediated signaling pathway	BP	6.15391e-12		GO:0042995	CC	cell projection	2154	879,6069	1,247813e-07	0.000259579
	GO:0042129	6.66434e-15	1	29	135	regulation of T cell proliferation	BP	1.23135e-11		GO:0023051	BP	regulation of signaling	3524	1360.17	1,517287e-07	0.000289334
	GO:0002252	8.51521e-15	1	89	1029	immune effector process	BP	1.44582e-11		GO:0031589	BP	cell-substrate adhesion	352	180,0000	2,224186e-07	0.000379604
	GO:1903039	9.12933e-15	1	35	202	positive regulation of leukocyte cell-cell adhesion	BP	1.44582e-11		GO:0008092	MF	cytoskeletal protein binding	967	431,1667	2,322449e-07	0.000379604
	GO:0022409	2.40911e-14	1	37	232	positive regulation of cell-cell adhesion	BP	3.56098e-11		GO:0007155	BP	cell adhesion	1405	588,4889	2,841714e-07	0.000433513
	GO:0042110	2.65944e-14	1	50	409	T cell activation	BP	3.67494e-11		GO:0007160	BP	cell-matrix adhesion	224	122,0000	3,251087e-07	0.000464966
	GO:0045087	2.8177e-14	1	72	752	innate immune response	BP	3.67494e-11		GO:0043062	BP	extracellular structure organization	418	201,0000	3,801131e-07	0.000511655
	GO:0050670	8.34132e-14	1	32	182	regulation of lymphocyte proliferation	BP	1.02747e-10		GO:0097435	BP	supramolecular fiber organization	664	302,5000	4,154043e-07	0.000528094
	GO:0002696	9.37184e-14	1	40	282	positive regulation of leukocyte activation	BP	1.03689e-10		GO:0007266	BP	Rho protein signal transduction	198	108,0000	4,790270e-07	0.000576925
	GO:0045321	9.81699e-14	1	89	1080	leukocyte activation	BP	1.03689e-10		GO:0120025	CC	plasma membrane bounded cell projection	2079	847,6069	5,139791e-07	0.000586864

## Sheet: GO_terms_LF2
	Gene features ontology											CpG features ontology
	category	over_represented_pvalue	under_represented_pvalue	numDEInCat	numInCat	term	ontology	padj				TERM	N	DE	P,DE	FDR
	GO:0005634	1.22098e-25	1	608	6576	nucleus	CC	2.70715e-21		GO:0071944	CC	cell periphery	5326	1966.5	5.90516e-09	0.000135128
	GO:0005654	7.90434e-23	1	354	3310	nucleoplasm	CC	8.76275e-19		GO:0009986	CC	cell surface	805	352,00000	1.65938e-08	0.000163336
	GO:0003676	1.92577e-22	1	376	3562	nucleic acid binding	MF	1.42327e-18		GO:0005886	CC	plasma membrane	5209	1915.67	2.14136e-08	0.000163336
	GO:0044424	2.59643e-22	1	967	12612	intracellular part	CC	1.4392e-18		GO:0044459	CC	plasma membrane part	2769	1095.83	4.62277e-08	0.000264457
	GO:0005622	4.20935e-22	1	967	12622	intracellular	CC	1.86659e-18		GO:0022610	BP	biological adhesion	1412	582,50000	5.74447e-05	0.226823
	GO:0044428	7.12283e-21	1	419	4238	nuclear part	CC	2.63212e-17		GO:0009897	CC	external side of plasma membrane	308	134,50000	5.94738e-05	0.226823
	GO:0090304	9.44534e-21	1	451	4624	nucleic acid metabolic process	BP	2.99174e-17		GO:0007155	BP	cell adhesion	1405	578,50000	8.01026e-05	0.261856
	GO:0031981	4.11756e-19	1	386	3890	nuclear lumen	CC	1.14118e-15		GO:0038024	MF	cargo receptor activity	81	45,00000	0.000150339	0.407869
	GO:0043231	5.11576e-19	1	787	9733	intracellular membrane-bounded organelle	CC	1.2603e-15		GO:0044425	CC	membrane part	6452	2218.33	0.000224297	0.407869
	GO:0016070	1.14597e-18	1	407	4136	RNA metabolic process	BP	2.54085e-15		GO:0002790	BP	peptide secretion	613	252,33333	0.00022467	0.407869
	GO:0043229	1.46868e-18	1	874	11155	intracellular organelle	CC	2.96033e-15		GO:0098552	CC	side of membrane	498	211,00000	0.000235534	0.407869
	GO:0043170	1.61032e-17	1	688	8185	macromolecule metabolic process	BP	2.97534e-14		GO:0016021	CC	integral component of membrane	5026	1709.33	0.000251537	0.407869
	GO:0010467	1.84356e-17	1	455	4853	gene expression	BP	3.14425e-14		GO:1900076	BP	regulation of cellular response to insulin stimulus	73	41,16667	0.000257453	0.407869
	GO:0006139	2.05407e-17	1	482	5252	nucleobase-containing compound metabolic process	BP	3.25306e-14		GO:0031224	CC	intrinsic component of membrane	5189	1767.33	0.000258049	0.407869
	GO:0019219	8.44863e-17	1	359	3564	regulation of nucleobase-containing compound metabolic process	BP	1.24595e-13		GO:0015293	MF	symporter activity	144	70,50000	0.000267362	0.407869
	GO:0003677	8.99116e-17	1	242	2112	DNA binding	MF	1.24595e-13		GO:0009306	BP	protein secretion	580	238,83333	0.000300279	0.429456
	GO:0046483	1.33158e-16	1	487	5375	heterocycle metabolic process	BP	1.73669e-13		GO:0005044	MF	scavenger receptor activity	47	27,00000	0.000366226	0.492961
	GO:0006725	1.93558e-16	1	489	5412	cellular aromatic compound metabolic process	BP	2.3842e-13		GO:0030198	BP	extracellular matrix organization	364	169,00000	0.000389453	0.495102
	GO:0051252	2.34303e-16	1	335	3275	regulation of RNA metabolic process	BP	2.73419e-13		GO:0006820	BP	anion transport	625	251,00000	0.000501005	0.603394
	GO:0044260	4.26949e-16	1	619	7229	cellular macromolecule metabolic process	BP	4.73316e-13		GO:0042226	BP	interleukin-6 biosynthetic process	28	17,00000	0.000529287	0.605584

## Sheet: GO_terms_LF3
	Gene features ontology												CpG features ontology
	category	over_represented_pvalue	under_represented_pvalue	numDEInCat	numInCat	term	ontology	padj							TERM	N	DE	P,DE	FDR
	GO:0009653	1.19991e-19	1	157	2321	anatomical structure morphogenesis	BP	2.66044e-15					GO:0030016	CC	myofibril	222	135,50000	6.84825e-16	8.4609e-12
	GO:0030198	6.39616e-18	1	47	325	extracellular matrix organization	BP	7.09079e-14					GO:0043292	CC	contractile fiber	232	139,50000	7.39492e-16	8.4609e-12
	GO:0062023	1.24942e-17	1	49	352	collagen-containing extracellular matrix	CC	9.23405e-14					GO:0044449	CC	contractile fiber part	219	131,50000	9.28894e-15	7.0853e-11
	GO:0031012	2.94984e-17	1	55	444	extracellular matrix	CC	1.63509e-13					GO:0030017	CC	sarcomere	202	122,50000	2.51073e-14	1.43632e-10
	GO:0048856	4.00103e-17	1	251	4875	anatomical structure development	BP	1.77422e-13					GO:0031674	CC	I band	142	90,50000	2.04511e-11	9.35964e-08
	GO:0016477	6.80296e-17	1	100	1264	cell migration	BP	2.51392e-13					GO:0030018	CC	Z disc	131	83,50000	5.12202e-10	1.95345e-06
	GO:0040011	9.67362e-17	1	115	1577	locomotion	BP	3.06405e-13					GO:0072359	BP	circulatory system development	1156	485,45000	5.53572e-09	1.80963e-05
	GO:0006928	1.21514e-16	1	126	1805	movement of cell or subcellular component	BP	3.36776e-13					GO:0003013	BP	circulatory system process	546	246,01190	1.1285e-08	3.00351e-05
	GO:0043062	1.65935e-16	1	48	368	extracellular structure organization	BP	4.00523e-13					GO:0071944	CC	cell periphery	5326	1867.33	1.18129e-08	3.00351e-05
	GO:0005201	1.80644e-16	1	31	145	extracellular matrix structural constituent	MF	4.00523e-13					GO:0005886	CC	plasma membrane	5209	1822.83	2.14557e-08	4.5311e-05
	GO:0032501	2.81546e-16	1	283	5860	multicellular organismal process	BP	5.67495e-13					GO:0003012	BP	muscle system process	462	212,63095	2.28764e-08	4.5311e-05
	GO:0032502	6.35465e-16	1	259	5208	developmental process	BP	1.17413e-12					GO:0044459	CC	plasma membrane part	2769	1048	2.37614e-08	4.5311e-05
	GO:0048870	1.00753e-15	1	103	1381	cell motility	BP	1.59564e-12					GO:0042383	CC	sarcolemma	136	84,00000	2.70905e-08	4.76854e-05
	GO:0051674	1.00753e-15	1	103	1381	localization of cell	BP	1.59564e-12					GO:0003015	BP	heart process	287	145,36905	3.01867e-08	4.93402e-05
	GO:0007275	1.42403e-14	1	228	4461	multicellular organism development	BP	2.10491e-11					GO:0008015	BP	blood circulation	536	239,01190	3.3016e-08	5.0367e-05
	GO:0005788	3.53824e-14	1	37	268	endoplasmic reticulum lumen	CC	4.90312e-11					GO:0055002	BP	striated muscle cell development	173	94,36905	5.20986e-08	7.45108e-05
	GO:0048731	5.17132e-13	1	206	4010	system development	BP	6.74462e-10					GO:0060047	BP	heart contraction	277	139,36905	5.89628e-08	7.93674e-05
	GO:0044421	7.58011e-13	1	149	2737	extracellular region part	CC	9.29606e-10					GO:0055001	BP	muscle cell development	186	100,36905	6.90861e-08	8.78276e-05
	GO:0005576	7.96614e-13	1	170	3272	extracellular region	CC	9.29606e-10					GO:0006936	BP	muscle contraction	357	169,00000	9.51885e-08	0.000114642
	GO:0097435	1.899e-12	1	57	619	supramolecular fiber organization	BP	2.10523e-09					GO:0044057	BP	regulation of system process	606	270,35714	1.20114e-07	0.000133332

## Sheet: GO_terms_LF4
	Gene features ontology												CpG features ontology
	category	over_represented_pvalue	under_represented_pvalue	numDEInCat	numInCat	term	ontology	padj					TERM	N	DE	P,DE	FDR
	GO:0045333	3.3344e-06	0.999999835941212	6	185	cellular respiration	BP	0.0739302			GO:0071944	CC	cell periphery	5326	1992,0000	1.26123e-14	2.88606e-10
	GO:0006091	1.85229e-05	0.999998043997781	8	489	generation of precursor metabolites and energy	BP	0.205345			GO:0005886	CC	plasma membrane	5209	1941,1667	8.08332e-14	9.24853e-10
	GO:0015980	4.61445e-05	0.99999634870556	6	268	energy derivation by oxidation of organic compounds	BP	0.300004			GO:0044459	CC	plasma membrane part	2769	1114,6667	4.37272e-12	3.13348e-08
	GO:0006099	6.76807e-05	0.999998864728495	3	33	tricarboxylic acid cycle	BP	0.300004			GO:0009986	CC	cell surface	805	365,5000	5.4774e-12	3.13348e-08
	GO:0006101	7.46052e-05	0.999998704002305	3	34	citrate metabolic process	BP	0.300004			GO:0006955	BP	immune response	1960	729,0000	8.66732e-11	3.96669e-07
	GO:0072350	9.14955e-05	0.999998287681706	3	37	tricarboxylic acid metabolic process	BP	0.300004			GO:0050776	BP	regulation of immune response	979	397,0000	2.93092e-10	1.11781e-06
	GO:0022904	9.47153e-05	0.999996051760828	4	114	respiratory electron transport chain	BP	0.300004			GO:0098552	CC	side of membrane	498	231,0000	3.70977e-09	1.21272e-05
	GO:0044444	0.000114941	0.999974005014124	34	8688	cytoplasmic part	CC	0.318558			GO:0002684	BP	positive regulation of immune system process	1050	421,5000	5.0068e-09	1.43213e-05
	GO:0010216	0.00016204	0.999999312093854	2	6	maintenance of DNA methylation	BP	0.399194			GO:0002253	BP	activation of immune response	598	257,0000	6.09046e-09	1.50042e-05
	GO:0016999	0.00020032	0.999989816246742	4	128	antibiotic metabolic process	BP	0.444149			GO:0009897	CC	external side of plasma membrane	308	147,0000	6.55692e-09	1.50042e-05
	GO:1901564	0.0002242	0.999935301911574	27	6023	organonitrogen compound metabolic process	BP	0.451907			GO:0002250	BP	adaptive immune response	396	178,0000	7.21303e-09	1.50051e-05
	GO:0051536	0.000328147	0.999990294364769	3	60	iron-sulfur cluster binding	MF	0.532274			GO:0050778	BP	positive regulation of immune response	771	318,0000	8.63801e-09	1.58141e-05
	GO:0051540	0.000328147	0.999990294364769	3	60	metal cluster binding	MF	0.532274			GO:0002682	BP	regulation of immune system process	1514	581,5000	8.9841e-09	1.58141e-05
	GO:0019752	0.000336092	0.999938891212313	9	945	carboxylic acid metabolic process	BP	0.532274			GO:0005887	CC	integral component of plasma membrane	1606	638,1667	2.30189e-08	3.76244e-05
	GO:0006665	0.000428064	0.999973351142742	4	141	sphingolipid metabolic process	BP	0.632736			GO:0002376	BP	immune system process	2862	1037,0000	2.51344e-08	3.83433e-05
	GO:0051170	0.000528247	0.999965182677159	4	150	import into nucleus	BP	0.72101			GO:0031226	CC	intrinsic component of plasma membrane	1685	667,6667	3.01855e-08	4.31709e-05
	GO:0022900	0.000552822	0.999963029865273	4	176	electron transport chain	BP	0.72101			GO:0001775	BP	cell activation	1346	525,5000	6.93272e-08	9.33185e-05
	GO:0043436	0.000661551	0.999867566563382	9	1027	oxoacid metabolic process	BP	0.768354			GO:0050865	BP	regulation of cell activation	536	233,5000	7.36754e-08	9.3662e-05
	GO:0080182	0.000664362	0.999992952928807	2	15	histone H3-K4 trimethylation	BP	0.768354			GO:0006909	BP	phagocytosis	262	131,5000	8.40205e-08	0.000101192
	GO:0005746	0.000711234	0.999972276573395	3	84	mitochondrial respiratory chain	CC	0.768354			GO:0022610	BP	biological adhesion	1412	591,5000	1.58844e-07	0.000180626

## Sheet: GO_terms_LF5
	Gene features ontology												CpG features ontology
	category	over_represented_pvalue	under_represented_pvalue	numDEInCat	numInCat	term	ontology	padj						N	DE	P,DE	FDR
	GO:0043231	2.63252e-08	1	699	9733	intracellular membrane-bounded organelle	CC	0.000339958			GO:0071944	CC	cell periphery	5326	2081.04	2.73948e-15	6,268746e-11
	GO:0044237	3.06655e-08	1	675	9377	cellular metabolic process	BP	0.000339958			GO:0005886	CC	plasma membrane	5209	2027.54	2.42265e-14	2,771875e-10
	GO:0044446	5.04313e-08	1	617	8401	intracellular organelle part	CC	0.000360601			GO:0006955	BP	immune response	1960	782,4500	3.76204e-14	2,869560e-10
	GO:0005488	7.72119e-08	1	864	12774	binding	MF	0.000360601			GO:0002376	BP	immune system process	2862	1127.7	2.07729e-13	1,006736e-09
	GO:0044444	8.13191e-08	1	633	8688	cytoplasmic part	CC	0.000360601			GO:0009986	CC	cell surface	805	384,0000	2.19975e-13	1,006736e-09
	GO:0044422	2.60821e-07	1	626	8645	organelle part	CC	0.00096382			GO:0044459	CC	plasma membrane part	2769	1157.7	5.54299e-12	1,890674e-08
	GO:0008152	4.78278e-07	1	701	9935	metabolic process	BP	0.00151491			GO:0001775	BP	cell activation	1346	574,0000	5.79014e-12	1,890674e-08
	GO:0016569	8.40058e-07	0.999999740068007	54	433	covalent chromatin modification	BP	0.00232822			GO:0022610	BP	biological adhesion	1412	644,3705	6.60988e-12	1,890674e-08
	GO:0044424	1.0952e-06	1	853	12612	intracellular part	CC	0.00269808			GO:0007155	BP	cell adhesion	1405	639,3705	1.51612e-11	3,854826e-08
	GO:0005622	1.39458e-06	1	853	12622	intracellular	CC	0.00309205			GO:0045321	BP	leukocyte activation	1190	500,0000	2.02817e-10	4,641058e-07
	GO:0016570	1.89189e-06	0.999999253105448	52	421	histone modification	BP	0.00381335			GO:0046903	BP	secretion	1639	680,5000	3.93189e-10	8,179411e-07
	GO:0043412	3.09981e-06	0.9999979878785	307	3892	macromolecule modification	BP	0.0055856			GO:0007166	BP	cell surface receptor signaling pathway	2895	1188.92	6.80283e-10	1,297243e-06
	GO:0005829	3.45423e-06	0.999997727285105	366	4681	cytosol	CC	0.0055856			GO:0005887	CC	integral component of plasma membrane	1606	674,2039	9.33767e-10	1,643645e-06
	GO:0071704	3.9748e-06	0.999997523732513	672	9533	organic substance metabolic process	BP	0.0055856			GO:0031226	CC	intrinsic component of plasma membrane	1685	704,7039	1.45184e-09	2,373034e-06
	GO:0044238	4.03461e-06	0.999997478469526	652	9210	primary metabolic process	BP	0.0055856			GO:0016192	BP	vesicle-mediated transport	1976	806,2500	2.62962e-09	4,011579e-06
	GO:0016740	4.14036e-06	0.999997578413014	182	2103	transferase activity	MF	0.0055856			GO:0002682	BP	regulation of immune system process	1514	608,0000	3.06864e-09	4,388726e-06
	GO:0005737	4.28266e-06	0.999997352209367	714	10197	cytoplasm	CC	0.0055856			GO:0031224	CC	intrinsic component of membrane	5189	1872.2	3.37477e-09	4,542642e-06
	GO:0044260	4.80872e-06	0.999996788854804	524	7229	cellular macromolecule metabolic process	BP	0.00592328			GO:0016021	CC	integral component of membrane	5026	1808.2	6.81641e-09	8,310670e-06
	GO:0005515	5.82291e-06	0.999996392450439	719	10343	protein binding	MF	0.00679503			GO:0032940	BP	secretion by cell	1504	621,5000	6.90044e-09	8,310670e-06
	GO:0005765	8.55061e-06	0.999996331685366	44	336	lysosomal membrane	CC	0.00947921			GO:0042110	BP	T cell activation	451	214,5000	9.62004e-09	1,100676e-05
