# Supplementary material for: Multi-omics assessment of dilated cardiomyopathy using non-negative matrix factorization
Source: PLoS One. 2022 Aug 18;17(8):e0272093. doi: 10.1371/journal.pone.0272093 (PMC9387871; doi:10.1371/journal.pone.0272093)
Supplement: S2 File — The node degree of the features selected per latent factor is documented in descending order. Also, top 50 correlations per latent factor are reported. (XLSX) [file pone.0272093.s020.xlsx]

## Sheet: LF1_node_degree
Tables contain the node degree of the features sorted by degree
feature	degree
ENSG00000140968_IRF8	8779
ENSG00000197629_MPEG1	8606
ENSG00000188042_ARL4C	8562
ENSG00000204287_HLA-DRA	8503
ENSG00000145649_GZMA	8496
ENSG00000198821_CD247	8299
ENSG00000137101_CD72	8254
ENSG00000115415_STAT1	8232
ENSG00000114013_CD86	8162
ENSG00000134602_STK26	8089
ENSG00000186517_ARHGAP30	7916
ENSG00000112297_CRYBG1	7907
ENSG00000163599_CTLA4	7894
ENSG00000135077_HAVCR2	7876
ENSG00000065675_PRKCQ	7806
ENSG00000090382_LYZ	7763
ENSG00000187474_FPR3	7758
ENSG00000109861_CTSC	7754
ENSG00000162645_GBP2	7729
ENSG00000242574_HLA-DMB	7707
ENSG00000180353_HCLS1	7624
ENSG00000160791_CCR5	7622
ENSG00000241106_HLA-DOB	7560
ENSG00000229474_PATL2	7537
ENSG00000165025_SYK	7500
ENSG00000145569_FAM105A	7471
ENSG00000109943_CRTAM	7444
ENSG00000260997_AC004847.1	7422
ENSG00000110077_MS4A6A	7390
ENSG00000152766_ANKRD22	7383
ENSG00000167208_SNX20	7376
ENSG00000268027_AC243960.1	7259
ENSG00000124508_BTN2A2	7240
ENSG00000172543_CTSW	7162
ENSG00000043462_LCP2	7128
ENSG00000158714_SLAMF8	7085
ENSG00000110324_IL10RA	7070
ENSG00000231389_HLA-DPA1	6914
ENSG00000010610_CD4	6900
ENSG00000112149_CD83	6863
ENSG00000144554_FANCD2	6816
ENSG00000151490_PTPRO	6804
ENSG00000163814_CDCP1	6750
ENSG00000005059_MCUB	6726
ENSG00000106785_TRIM14	6708
ENSG00000135426_TESPA1	6684
ENSG00000237943_PRKCQ-AS1	6653
ENSG00000239713_APOBEC3G	6638
ENSG00000134460_IL2RA	6627
ENSG00000026508_CD44	6626
ENSG00000232810_TNF	6587
ENSG00000255833_TIFAB	6585
ENSG00000135899_SP110	6580
ENSG00000162711_NLRP3	6576
ENSG00000132514_CLEC10A	6573
ENSG00000111801_BTN3A3	6573
ENSG00000131042_LILRB2	6560
ENSG00000186818_LILRB4	6504
ENSG00000258810_AL133371.2	6494
ENSG00000139970_RTN1	6460
ENSG00000148908_RGS10	6437
ENSG00000265206_AC004687.1	6387
ENSG00000139679_LPAR6	6360
ENSG00000105639_JAK3	6339
ENSG00000026950_BTN3A1	6317
ENSG00000196664_TLR7	6309
ENSG00000167613_LAIR1	6282
ENSG00000204257_HLA-DMA	6224
ENSG00000138964_PARVG	6209
ENSG00000163947_ARHGEF3	6208
ENSG00000133321_RARRES3	6207
ENSG00000197142_ACSL5	6198
ENSG00000111269_CREBL2	6189
ENSG00000125347_IRF1	6184
ENSG00000141506_PIK3R5	6165
ENSG00000115085_ZAP70	6164
ENSG00000162892_IL24	6125
ENSG00000171860_C3AR1	6123
ENSG00000204264_PSMB8	6122
ENSG00000179144_GIMAP7	6114
ENSG00000101347_SAMHD1	6104
ENSG00000171492_LRRC8D	6082
ENSG00000112308_C6orf62	6061
ENSG00000160255_ITGB2	6059
ENSG00000145779_TNFAIP8	6048
ENSG00000010030_ETV7	6044
ENSG00000256262_USP30-AS1	6033
ENSG00000168394_TAP1	6001
ENSG00000185404_SP140L	5998
ENSG00000139572_GPR84	5989
ENSG00000158481_CD1C	5971
ENSG00000100342_APOL1	5964
ENSG00000158488_CD1E	5963
ENSG00000260314_MRC1	5949
ENSG00000177675_CD163L1	5920
ENSG00000115604_IL18R1	5911
ENSG00000101911_PRPS2	5869
ENSG00000124491_F13A1	5839
ENSG00000168329_CX3CR1	5794
ENSG00000150782_IL18	5792
ENSG00000274114_AC004706.3	5778
ENSG00000105939_ZC3HAV1	5769
ENSG00000204267_TAP2	5766
ENSG00000138449_SLC40A1	5752
ENSG00000196735_HLA-DQA1	5750
ENSG00000140368_PSTPIP1	5737
ENSG00000153071_DAB2	5712
ENSG00000118640_VAMP8	5696
ENSG00000182578_CSF1R	5687
ENSG00000234745_HLA-B	5659
ENSG00000166278_C2	5627
ENSG00000186470_BTN3A2	5627
ENSG00000128284_APOL3	5615
ENSG00000143110_C1orf162	5614
ENSG00000154473_BUB3	5546
ENSG00000258875_AL135818.1	5509
ENSG00000136048_DRAM1	5509
ENSG00000184730_APOBR	5500
ENSG00000271605_MILR1	5475
ENSG00000131171_SH3BGRL	5456
ENSG00000249859_PVT1	5449
ENSG00000225492_GBP1P1	5449
ENSG00000102962_CCL22	5443
ENSG00000111424_VDR	5411
ENSG00000097046_CDC7	5362
ENSG00000133106_EPSTI1	5356
ENSG00000137509_PRCP	5330
ENSG00000177575_CD163	5328
ENSG00000148154_UGCG	5326
ENSG00000111863_ADTRP	5322
ENSG00000115525_ST3GAL5	5316
ENSG00000115875_SRSF7	5301
ENSG00000161921_CXCL16	5288
ENSG00000002549_LAP3	5209
ENSG00000007129_CEACAM21	5205
ENSG00000136514_RTP4	5189
ENSG00000105383_CD33	5170
ENSG00000150540_HNMT	5168
ENSG00000128604_IRF5	5166
ENSG00000178573_MAF	5165
ENSG00000112029_FBXO5	5140
ENSG00000226067_LINC00623	5095
ENSG00000140853_NLRC5	5091
ENSG00000091972_CD200	5081
ENSG00000196126_HLA-DRB1	5078
ENSG00000158411_MITD1	5065
ENSG00000181804_SLC9A9	5054
ENSG00000168876_ANKRD49	5053
ENSG00000139187_KLRG1	5026
ENSG00000168404_MLKL	4995
ENSG00000140105_WARS	4988
ENSG00000100450_GZMH	4908
ENSG00000146192_FGD2	4900
ENSG00000187514_PTMA	4885
ENSG00000126246_IGFLR1	4870
ENSG00000118242_MREG	4859
ENSG00000181634_TNFSF15	4857
ENSG00000076944_STXBP2	4834
ENSG00000189403_HMGB1	4832
ENSG00000204103_MAFB	4795
ENSG00000134215_VAV3	4794
ENSG00000156587_UBE2L6	4791
ENSG00000104043_ATP8B4	4776
ENSG00000184060_ADAP2	4760
ENSG00000281103_TRG-AS1	4739
ENSG00000119969_HELLS	4729
ENSG00000255197_AC090559.1	4715
ENSG00000092470_WDR76	4675
ENSG00000006634_DBF4	4666
ENSG00000169896_ITGAM	4662
ENSG00000183291_SELENOF	4658
ENSG00000189057_FAM111B	4633
ENSG00000159322_ADPGK	4615
ENSG00000165457_FOLR2	4604
ENSG00000182326_C1S	4602
ENSG00000235505_AP002004.1	4596
ENSG00000038274_MAT2B	4591
ENSG00000181467_RAP2B	4589
ENSG00000154978_VOPP1	4584
ENSG00000138698_RAP1GDS1	4559
ENSG00000101017_CD40	4545
ENSG00000110079_MS4A4A	4515
ENSG00000146457_WTAP	4466
ENSG00000175354_PTPN2	4464
ENSG00000167600_CYP2S1	4460
ENSG00000181374_CCL13	4452
ENSG00000185482_STAC3	4417
ENSG00000101843_PSMD10	4400
ENSG00000136527_TRA2B	4356
ENSG00000072694_FCGR2B	4353
ENSG00000055044_NOP58	4348
ENSG00000082397_EPB41L3	4339
ENSG00000236287_ZBED5	4333
ENSG00000143333_RGS16	4317
ENSG00000138801_PAPSS1	4310
ENSG00000049449_RCN1	4289
ENSG00000196668_LINC00173	4281
ENSG00000226091_LINC00937	4280
ENSG00000164924_YWHAZ	4277
ENSG00000235859_AC006978.1	4265
ENSG00000189266_PNRC2	4241
ENSG00000117602_RCAN3	4233
ENSG00000167004_PDIA3	4223
ENSG00000128203_ASPHD2	4222
ENSG00000139921_TMX1	4215
ENSG00000144136_SLC20A1	4210
ENSG00000170144_HNRNPA3	4204
ENSG00000278311_GGNBP2	4200
ENSG00000071243_ING3	4195
ENSG00000162976_PQLC3	4186
ENSG00000135486_HNRNPA1	4179
ENSG00000204642_HLA-F	4167
ENSG00000013374_NUB1	4147
ENSG00000100911_PSME2	4125
ENSG00000056558_TRAF1	4109
ENSG00000112081_SRSF3	4046
ENSG00000162607_USP1	4043
ENSG00000122565_CBX3	4035
ENSG00000133872_SARAF	4026
ENSG00000090659_CD209	4022
ENSG00000136147_PHF11	4020
ENSG00000198783_ZNF830	4006
ENSG00000196189_SEMA4A	3978
ENSG00000168310_IRF2	3965
ENSG00000187109_NAP1L1	3944
ENSG00000158092_NCK1	3944
ENSG00000121152_NCAPH	3934
ENSG00000072818_ACAP1	3926
ENSG00000120686_UFM1	3911
ENSG00000165490_DDIAS	3901
ENSG00000270659_AC079610.2	3900
ENSG00000277443_MARCKS	3898
ENSG00000115267_IFIH1	3862
ENSG00000118655_DCLRE1B	3831
ENSG00000184635_ZNF93	3827
ENSG00000123685_BATF3	3813
ENSG00000274020_LINC01138	3803
ENSG00000137492_THAP12	3794
ENSG00000136492_BRIP1	3769
ENSG00000155659_VSIG4	3759
ENSG00000197372_ZNF675	3752
ENSG00000132109_TRIM21	3750
ENSG00000174780_SRP72	3747
ENSG00000105246_EBI3	3719
ENSG00000117758_STX12	3684
ENSG00000183765_CHEK2	3678
ENSG00000104408_EIF3E	3674
ENSG00000151702_FLI1	3642
ENSG00000164548_TRA2A	3634
ENSG00000120262_CCDC170	3605
ENSG00000204516_MICB	3600
ENSG00000109320_NFKB1	3557
ENSG00000104231_ZFAND1	3551
ENSG00000185880_TRIM69	3541
ENSG00000143184_XCL1	3539
ENSG00000132603_NIP7	3536
ENSG00000166825_ANPEP	3533
ENSG00000139597_N4BP2L1	3512
ENSG00000137876_RSL24D1	3501
ENSG00000165527_ARF6	3497
ENSG00000153975_ZUFSP	3484
ENSG00000188725_SMIM15	3469
ENSG00000206503_HLA-A	3463
ENSG00000184743_ATL3	3462
ENSG00000197943_PLCG2	3448
ENSG00000170915_PAQR8	3447
ENSG00000057608_GDI2	3417
ENSG00000245648_AC022075.1	3374
ENSG00000138744_NAAA	3359
ENSG00000164167_LSM6	3350
ENSG00000140612_SEC11A	3339
ENSG00000205403_CFI	3332
ENSG00000241839_PLEKHO2	3323
ENSG00000167850_CD300C	3311
ENSG00000133639_BTG1	3305
ENSG00000198805_PNP	3282
ENSG00000163608_NEPRO	3279
ENSG00000182718_ANXA2	3271
ENSG00000088035_ALG6	3263
ENSG00000117586_TNFSF4	3263
ENSG00000134256_CD101	3235
ENSG00000102317_RBM3	3234
ENSG00000139675_HNRNPA1L2	3218
ENSG00000089006_SNX5	3208
ENSG00000011260_UTP18	3203
ENSG00000088827_SIGLEC1	3150
ENSG00000152240_HAUS1	3149
ENSG00000228956_SATB1-AS1	3125
ENSG00000146410_MTFR2	3114
ENSG00000067560_RHOA	3108
ENSG00000116473_RAP1A	3084
ENSG00000105829_BET1	3065
ENSG00000188612_SUMO2	3063
ENSG00000124786_SLC35B3	3051
ENSG00000167088_SNRPD1	3049
ENSG00000134046_MBD2	3041
ENSG00000170540_ARL6IP1	3031
ENSG00000167711_SERPINF2	3012
ENSG00000181163_NPM1	3011
ENSG00000106868_SUSD1	3009
ENSG00000165591_FAAH2	3001
ENSG00000140006_WDR89	3001
ENSG00000198856_OSTC	2929
ENSG00000205581_HMGN1	2919
ENSG00000152193_RNF219	2914
ENSG00000188603_CLN3	2907
ENSG00000077238_IL4R	2900
ENSG00000129480_DTD2	2889
ENSG00000165512_ZNF22	2887
ENSG00000125703_ATG4C	2859
ENSG00000270933_AC010719.1	2845
ENSG00000134287_ARF3	2842
ENSG00000129518_EAPP	2838
ENSG00000069849_ATP1B3	2837
ENSG00000163584_RPL22L1	2824
ENSG00000008517_IL32	2821
ENSG00000171631_P2RY6	2821
ENSG00000103978_TMEM87A	2770
ENSG00000100567_PSMA3	2761
ENSG00000072042_RDH11	2759
ENSG00000074696_HACD3	2751
ENSG00000128534_LSM8	2742
ENSG00000156384_SFR1	2739
ENSG00000046651_OFD1	2719
ENSG00000196646_ZNF136	2707
ENSG00000114861_FOXP1	2699
ENSG00000118363_SPCS2	2697
ENSG00000245571_AP001258.1	2694
ENSG00000134363_FST	2691
ENSG00000180539_C9orf139	2666
ENSG00000196460_RFX8	2657
ENSG00000179639_FCER1A	2641
ENSG00000130741_EIF2S3	2640
ENSG00000166012_TAF1D	2638
ENSG00000153006_SREK1IP1	2621
ENSG00000138160_KIF11	2620
ENSG00000007968_E2F2	2597
ENSG00000145354_CISD2	2589
ENSG00000118292_C1orf54	2575
ENSG00000269892_AC125494.2	2572
ENSG00000280153_AC133065.6	2558
ENSG00000125730_C3	2556
ENSG00000080986_NDC80	2544
ENSG00000067066_SP100	2534
ENSG00000092010_PSME1	2530
ENSG00000147905_ZCCHC7	2507
ENSG00000143228_NUF2	2500
ENSG00000163950_SLBP	2496
ENSG00000101224_CDC25B	2491
ENSG00000227986_TRIM60P18	2484
ENSG00000116030_SUMO1	2465
ENSG00000134748_PRPF38A	2445
ENSG00000115368_WDR75	2442
ENSG00000165389_SPTSSA	2440
ENSG00000023318_ERP44	2438
ENSG00000124209_RAB22A	2435
ENSG00000136146_MED4	2432
ENSG00000122557_HERPUD2	2407
ENSG00000146409_SLC18B1	2403
ENSG00000124496_TRERF1	2402
ENSG00000187653_TMSB4XP8	2373
ENSG00000112237_CCNC	2369
ENSG00000120616_EPC1	2356
ENSG00000089127_OAS1	2353
ENSG00000138668_HNRNPD	2347
ENSG00000068079_IFI35	2322
ENSG00000131778_CHD1L	2317
ENSG00000085231_AK6	2302
ENSG00000236790_LINC00299	2294
ENSG00000106462_EZH2	2289
ENSG00000136634_IL10	2281
ENSG00000126561_STAT5A	2268
ENSG00000130477_UNC13A	2265
ENSG00000170049_KCNAB3	2260
ENSG00000023041_ZDHHC6	2258
ENSG00000270127_AC027020.2	2250
ENSG00000265241_RBM8A	2237
ENSG00000129465_RIPK3	2195
ENSG00000283429_MIR1244-3	2195
ENSG00000121064_SCPEP1	2186
ENSG00000100532_CGRRF1	2182
ENSG00000237352_LINC01358	2181
ENSG00000033170_FUT8	2171
ENSG00000123737_EXOSC9	2162
ENSG00000231113_AL035587.1	2160
ENSG00000174842_GLMN	2158
ENSG00000147604_RPL7	2158
ENSG00000196154_S100A4	2147
ENSG00000225217_HSPA7	2138
ENSG00000157693_TMEM268	2127
ENSG00000235552_AP005202.1	2125
ENSG00000100167_SEPT3	2117
ENSG00000135596_MICAL1	2116
ENSG00000112763_BTN2A1	2105
ENSG00000006451_RALA	2069
ENSG00000110958_PTGES3	2055
ENSG00000128699_ORMDL1	2046
ENSG00000124357_NAGK	2029
ENSG00000145425_RPS3A	2026
ENSG00000073803_MAP3K13	2017
ENSG00000116251_RPL22	2010
ENSG00000074266_EED	2002
ENSG00000223656_HMGB3P10	1991
ENSG00000163682_RPL9	1981
ENSG00000198865_CCDC152	1976
ENSG00000166928_MS4A14	1958
ENSG00000273507_AL354809.1	1953
ENSG00000166803_PCLAF	1948
ENSG00000139083_ETV6	1947
ENSG00000091009_RBM27	1946
ENSG00000140832_MARVELD3	1941
ENSG00000163689_C3orf67	1937
ENSG00000164088_PPM1M	1933
ENSG00000139624_CERS5	1919
ENSG00000134955_SLC37A2	1912
ENSG00000184056_VPS33B	1912
ENSG00000242125_SNHG3	1905
ENSG00000164162_ANAPC10	1904
ENSG00000135476_ESPL1	1896
ENSG00000196262_PPIA	1889
ENSG00000167914_GSDMA	1888
ENSG00000113460_BRIX1	1875
ENSG00000113328_CCNG1	1843
ENSG00000214290_COLCA2	1829
ENSG00000122406_RPL5	1827
ENSG00000034533_ASTE1	1819
ENSG00000139644_TMBIM6	1794
ENSG00000148690_FRA10AC1	1787
ENSG00000130270_ATP8B3	1786
ENSG00000198951_NAGA	1783
ENSG00000234741_GAS5	1782
ENSG00000134817_APLNR	1768
ENSG00000272463_AL357054.4	1766
ENSG00000184860_SDR42E1	1758
ENSG00000152904_GGPS1	1756
ENSG00000177879_AP3S1	1755
ENSG00000280433_FP565260.7	1735
ENSG00000117360_PRPF3	1729
ENSG00000183726_TMEM50A	1729
ENSG00000166024_R3HCC1L	1713
ENSG00000273559_CWC25	1707
ENSG00000156298_TSPAN7	1699
ENSG00000024862_CCDC28A	1691
ENSG00000131876_SNRPA1	1690
ENSG00000114942_EEF1B2	1684
ENSG00000143178_TBX19	1675
ENSG00000186104_CYP2R1	1674
ENSG00000119655_NPC2	1672
ENSG00000104312_RIPK2	1667
ENSG00000123374_CDK2	1662
ENSG00000130429_ARPC1B	1652
ENSG00000118197_DDX59	1639
ENSG00000280106_AC008555.8	1629
ENSG00000180938_ZNF572	1623
ENSG00000125870_SNRPB2	1618
ENSG00000163624_CDS1	1612
ENSG00000092871_RFFL	1608
ENSG00000268471_LINC02486	1602
ENSG00000108654_DDX5	1589
ENSG00000116514_RNF19B	1566
ENSG00000185158_LRRC37B	1561
ENSG00000113272_THG1L	1557
ENSG00000109536_FRG1	1553
ENSG00000269609_RPARP-AS1	1552
ENSG00000168280_KIF5C	1552
ENSG00000255717_SNHG1	1549
ENSG00000080822_CLDND1	1545
ENSG00000213928_IRF9	1536
ENSG00000189050_RNFT1	1536
ENSG00000166562_SEC11C	1530
ENSG00000125657_TNFSF9	1528
ENSG00000256683_ZNF350	1527
ENSG00000136770_DNAJC1	1508
ENSG00000281404_LINC01176	1507
ENSG00000113648_H2AFY	1500
ENSG00000179761_PIPOX	1498
ENSG00000267547_AC060766.4	1471
ENSG00000164346_NSA2	1466
ENSG00000151876_FBXO4	1458
ENSG00000188707_ZBED6CL	1451
ENSG00000205352_PRR13	1439
ENSG00000116478_HDAC1	1438
ENSG00000232472_EEF1B2P3	1436
ENSG00000164096_C4orf3	1431
ENSG00000138231_DBR1	1410
ENSG00000273449_AC093788.1	1410
ENSG00000274561_AC005332.6	1396
ENSG00000124784_RIOK1	1396
ENSG00000187764_SEMA4D	1393
ENSG00000197989_SNHG12	1379
ENSG00000118557_PMFBP1	1376
ENSG00000224429_LINC00539	1375
ENSG00000272779_AC245060.4	1375
ENSG00000119686_FLVCR2	1374
ENSG00000088832_FKBP1A	1364
ENSG00000275759_AC026367.3	1362
ENSG00000182004_SNRPE	1352
ENSG00000159228_CBR1	1350
ENSG00000151062_CACNA2D4	1350
ENSG00000163444_TMEM183A	1350
ENSG00000100219_XBP1	1346
ENSG00000120699_EXOSC8	1326
ENSG00000135211_TMEM60	1322
ENSG00000168785_TSPAN5	1319
ENSG00000156171_DRAM2	1316
ENSG00000241343_RPL36A	1312
ENSG00000136238_RAC1	1309
ENSG00000164414_SLC35A1	1306
ENSG00000148057_IDNK	1296
ENSG00000196214_ZNF766	1287
ENSG00000214413_BBIP1	1287
ENSG00000259865_AL390728.6	1279
ENSG00000166707_ZCCHC18	1276
ENSG00000169598_DFFB	1273
ENSG00000113811_SELENOK	1265
ENSG00000100632_ERH	1264
ENSG00000081721_DUSP12	1229
ENSG00000271646_AC099343.3	1229
ENSG00000169249_ZRSR2	1209
ENSG00000272888_LINC01578	1205
ENSG00000120697_ALG5	1203
ENSG00000197961_ZNF121	1203
ENSG00000136938_ANP32B	1187
ENSG00000183431_SF3A3	1183
ENSG00000143753_DEGS1	1181
ENSG00000236801_RPL24P8	1172
ENSG00000233429_HOTAIRM1	1166
ENSG00000081870_HSPB11	1158
ENSG00000236876_TMSB4XP1	1123
ENSG00000155868_MED7	1114
ENSG00000240344_PPIL3	1112
ENSG00000104490_NCALD	1108
ENSG00000106588_PSMA2	1058
ENSG00000103018_CYB5B	1053
ENSG00000010244_ZNF207	1041
ENSG00000088986_DYNLL1	1040
ENSG00000171817_ZNF540	1031
ENSG00000255328_AC136475.5	1015
ENSG00000278058_AC009159.3	1004
ENSG00000137944_KYAT3	993
ENSG00000134597_RBMX2	989
ENSG00000150048_CLEC1A	981
ENSG00000163312_HELQ	980
ENSG00000184939_ZFP90	976
ENSG00000186665_C17orf58	968
ENSG00000188243_COMMD6	967
ENSG00000114405_C3orf14	957
ENSG00000224578_HNRNPA1P48	928
ENSG00000279528_AC115618.3	921
ENSG00000237949_LINC00844	917
ENSG00000171863_RPS7	914
ENSG00000213139_CRYGS	913
ENSG00000118181_RPS25	901
ENSG00000130023_ERMARD	899
ENSG00000254505_CHMP4A	895
ENSG00000164039_BDH2	891
ENSG00000260766_AL513302.2	891
ENSG00000035499_DEPDC1B	880
ENSG00000145348_TBCK	857
ENSG00000146007_ZMAT2	852
ENSG00000279673_AC092919.2	843
ENSG00000175518_UBQLNL	841
ENSG00000174456_C12orf76	840
ENSG00000259623_AC125257.1	837
ENSG00000169241_SLC50A1	835
ENSG00000185798_WDR53	834
ENSG00000196459_TRAPPC2	823
ENSG00000006625_GGCT	813
ENSG00000222041_CYTOR	810
ENSG00000125691_RPL23	803
ENSG00000101003_GINS1	802
ENSG00000278642_AC015813.4	783
ENSG00000118961_LDAH	778
ENSG00000242861_AL591895.1	775
ENSG00000143748_NVL	770
ENSG00000101138_CSTF1	765
ENSG00000184786_TCTE3	749
ENSG00000178381_ZFAND2A	744
ENSG00000271870_AC024060.1	744
ENSG00000149483_TMEM138	740
ENSG00000100473_COCH	738
ENSG00000260711_AL121839.2	732
ENSG00000124596_OARD1	731
ENSG00000273899_NOL12	726
ENSG00000150433_TMEM218	724
ENSG00000217555_CKLF	719
ENSG00000153982_GDPD1	699
ENSG00000243943_ZNF512	697
ENSG00000140022_STON2	687
ENSG00000186468_RPS23	687
ENSG00000106733_NMRK1	683
ENSG00000102900_NUP93	682
ENSG00000243199_AC115223.1	682
ENSG00000108578_BLMH	678
ENSG00000171115_GIMAP8	677
ENSG00000008324_SS18L2	670
ENSG00000265298_AC132812.1	655
ENSG00000168792_ABHD15	646
ENSG00000162222_TTC9C	640
ENSG00000104824_HNRNPL	639
ENSG00000236120_AC110995.1	636
ENSG00000268713_AC005261.4	620
ENSG00000246273_SBF2-AS1	610
ENSG00000268970_AC022150.2	604
ENSG00000272758_AC083798.2	598
ENSG00000102390_PBDC1	596
ENSG00000130921_C12orf65	584
ENSG00000254996_ANKHD1-EIF4EBP3	582
ENSG00000158773_USF1	579
ENSG00000133678_TMEM254	572
ENSG00000101160_CTSZ	567
ENSG00000133794_ARNTL	566
ENSG00000214223_HNRNPA1P10	565
ENSG00000135845_PIGC	563
ENSG00000071082_RPL31	562
ENSG00000249684_AC106795.2	554
cg06649282_USB1,MMP15	551
ENSG00000196659_TTC30B	549
ENSG00000129084_PSMA1	543
ENSG00000166788_SAAL1	537
ENSG00000165502_RPL36AL	527
ENSG00000196449_YRDC	525
ENSG00000120437_ACAT2	518
ENSG00000139719_VPS33A	504
cg05442717_RARA	501
cg01631454_cg01631454_NA	501
cg14391016_cg14391016_NA	501
cg16301924_cg16301924_NA	499
ENSG00000134419_RPS15A	498
cg14791193_SZRD1	488
cg08792388_cg08792388_NA	488
cg06036239_cg06036239_NA	483
cg20598921_PANK4,PLCH2	482
cg18863922_LRRC71,PEAR1	477
cg14026113_FAM19A5	477
cg13751778_cg13751778_NA	475
ENSG00000065600_TMEM206	474
cg18786782_cg18786782_NA	469
cg16656493_CNPY3	469
cg09386073_MRPL58,CDR2L	467
cg04127587_GRK6	467
cg00093688_RNF208,RNF224,NDOR1,CYSRT1	466
cg24647820_cg24647820_NA	461
cg08498539_cg08498539_NA	457
cg01038597_KAT8,BCKDK	456
cg03961824_cg03961824_NA	453
cg21560076_EXPH5	452
ENSG00000213988_ZNF90	452
ENSG00000177058_SLC38A9	452
cg11354105_DNMT3A	451
cg13490869_DCAF4	451
cg01515508_CASZ1	450
cg15252243_TIGD2,FAM13A	448
ENSG00000144048_DUSP11	448
ENSG00000223969_AC002456.1	448
cg07620544_TRIM72	447
cg10789749_C20orf96	447
ENSG00000120963_ZNF706	446
cg06364159_cg06364159_NA	443
cg00105102_PMF1,BGLAP,PAQR6,SMG5	442
cg12917153_cg12917153_NA	442
cg01512532_FSCN2,ACTG1	442
cg09143663_BACH1,LINC00189	441
cg00156230_CCM2	440
cg22103164_cg22103164_NA	440
cg11388228_SLC45A1,RERE	440
cg06139166_ZDHHC1	439
cg14816825_MICAL2	438
cg11192059_cg11192059_NA	435
cg27177841_VASH2	435
cg21656522_SLC4A1	435
ENSG00000133624_ZNF767P	435
cg14178380_ANXA11	433
cg17220545_cg17220545_NA	433
cg00328729_PRDM11	433
cg23643813_DVL1,CPTP,TAS1R3	432
cg25504607_cg25504607_NA	432
cg22806527_HRH2	431
cg17262868_ABR	431
ENSG00000182774_RPS17	431
cg18529958_ST5,AKIP1	430
cg12339133_C7orf50	430
cg06397398_ZNF331	429
cg11669285_PTRF	426
ENSG00000139974_SLC38A6	426
cg16580616_cg16580616_NA	425
cg18327695_MAP4K4	425
cg25406657_TPM1	424
cg02529544_JPH3	424
cg03743678_cg03743678_NA	424
cg22348654_PERM1,PLEKHN1	423
cg07148318_OPLAH	423
cg05955332_CHCHD6	423
cg01076874_LRFN1	420
cg12932613_cg12932613_NA	420
cg21609154_MCF2L,MCF2L-AS1	420
cg01485439_TMEM134,CABP4	420
cg00924855_cg00924855_NA	419
cg03603260_MLLT11,CDC42SE1,C1orf56,BNIPL	418
cg03598938_NAB1	418
cg25224048_LIFR,EGFLAM	418
cg27300870_KIAA1211L	418
cg00044729_GRAP2	418
cg19066391_CCDC71,KLHDC8B	417
cg09047734_cg09047734_NA	417
cg11366683_ARHGAP26	417
cg20847228_GNAI2	417
cg26725502_cg26725502_NA	417
ENSG00000280120_AC073857.1	416
cg07059009_cg07059009_NA	415
cg07479786_FAM63A,ANXA9	414
cg27535302_cg27535302_NA	414
cg14028671_C9orf139,NPDC1,ENTPD2	414
cg14517355_PRRT3-AS1,EMC3,PRRT3,CRELD1	413
cg16441388_cg16441388_NA	413
ENSG00000214975_PPIAP29	413
cg23323671_STMN1	412
cg22368545_SLC25A45	412
cg13948430_cg13948430_NA	412
ENSG00000260526_AC109347.1	412
cg19465268_RHBDD2	411
ENSG00000267076_CCDC58P3	411
cg03752885_DAPK3,EEF2	410
cg06262280_ITGA6	410
cg15604953_LEFTY1,TMEM63A	410
cg16240683_ZNF436,ZNF436-AS1	410
ENSG00000086589_RBM22	410
cg02973057_SMTN	409
cg07256668_NRXN2	408
cg00281664_ATP11A	408
cg02696675_RBMS1	407
cg08915171_cg08915171_NA	407
cg01105356_CIITA,DEXI	407
cg16617817_MAFK,TMEM184A	406
cg24564096_SORCS2	406
cg19402371_RPL28	405
cg05113927_UCN,TRIM54,MPV17	405
cg14508791_CFAP46	405
cg17724627_FMNL3,PRPF40B	405
cg09304968_GSAP	404
cg18299068_MAEA	404
cg08326468_TSC2,SLC9A3R2,NTHL1	404
cg06216468_MLXIP	404
cg10259004_MYL9,DLGAP4-AS1	402
cg07523043_cg07523043_NA	402
cg27507254_P3H1	402
cg10776186_NUP58	402
cg06817736_TBC1D1	402
cg01641620_PANX2,MOV10L1	401
cg00070460_CTBP1	401
cg12905252_PRDM16	400
cg04396312_BMPR1A,MMRN2	399
cg03301579_MATK	399
cg23460145_ARHGEF17	399
cg22951027_KLHL33	399
cg10017105_cg10017105_NA	399
cg00425827_ACSL6	398
cg11763866_cg11763866_NA	397
cg09697510_TRIM56	397
cg26538224_C1QTNF6	396
cg10516359_SLC35C1	396
cg16054502_HSPG2	394
cg20302637_KRTCAP2,TRIM46	394
cg06617202_CNTN2	394
cg18699916_AGPAT1	394
cg14281039_TNNT1,DNAAF3,TNNI3	393
cg03143486_DNAAF5	393
cg18181787_cg18181787_NA	393
cg06513139_UBXN6	392
cg10702041_SLC4A2,AGAP3,TMUB1,FASTK	392
cg19175364_ACAP1,KCTD11	392
cg18900591_SALL4	392
cg18139800_AGPAT1,RNF5	392
ENSG00000147140_NONO	392
cg20586163_cg20586163_NA	392
cg01638311_PACS1	392
cg04237436_TRIM44	392
cg11160654_cg11160654_NA	392
cg21473814_CRTC1	391
cg22123915_CYR61,DDAH1	390
cg09734080_ASB1	390
cg09329079_MAFK,TMEM184A	390
cg10090414_SLC45A4	389
cg02502704_CREM	389
cg00018198_CEP68,RAB1A	389
cg17824690_THAP4	389
cg11988928_LCTL	389
cg13040691_KIRREL3,ST3GAL4	389
cg17074353_PAQR5	389
cg17469359_POU6F2	388
cg18885992_SULT2B1	388
cg11569933_cg11569933_NA	387
cg18939260_MTSS1	387
cg22897193_MIR4506,ASB2	387
cg04122918_DPF3	387
cg10690657_CYP4F29P	387
ENSG00000134262_AP4B1	387
cg15911153_SPATA24,MZB1,PROB1	386
cg21897315_GBE1	386
cg12577372_RUSC1,RUSC1-AS1,FDPS	386
cg26995653_cg26995653_NA	386
cg06906952_ZBTB18	386
cg08779982_PKD1,TSC2	386
cg17004906_FBXO6,MAD2L2,FBXO44	386
cg24132129_SLC16A3	385
cg02518546_AFF3	385
cg08282428_cg08282428_NA	385
cg24306177_cg24306177_NA	385
cg07094847_HOXA-AS2,HOXA3,HOXA4	385
cg14528319_GIPC1,SNRPGP15	384
cg08700707_cg08700707_NA	384
cg08885409_CUEDC1	384
cg16406030_ZFPM1	384
cg26306869_S100A4,S100A3	384
cg10030458_CHPF2,SMARCD3	384
cg05638830_EFCAB14	384
cg24881255_MATK,MRPL54	383
cg07280582_PCBP2	383
cg12081870_CDK18	383
cg25135555_GAS7	383
cg11937797_CYB561	383
cg19563158_MAPKAPK5-AS1,MAPKAPK5	383
cg26985366_YKT6,CAMK2B	383
cg20308817_CLEC11A,SHANK1	383
cg05982686_cg05982686_NA	382
cg15082394_RGL2,TAPBP,PFDN6	382
cg21255209_CMAS	382
cg11238352_cg11238352_NA	382
cg24874003_GNG7	381
cg12105183_GBP6	381
cg13883603_SH2D3C	380
cg14523204_RGS3	380
cg09676622_NCOR2	380
cg18773617_MEX3B	380
cg19489188_ANKRD24,SIRT6	380
cg01776278_ZNF467,SSPO	379
cg04063235_MIRLET7BHG	379
cg18231319_YARS2,DNM1L	379
cg08480266_LGI4,FXYD3	379
cg13341668_RASSF1	378
cg22735105_ZBTB46	378
cg15495091_ATP11A	378
cg14645861_cg14645861_NA	378
cg08110610_cg08110610_NA	378
cg24195796_APBA2	378
cg07268245_cg07268245_NA	378
cg26555306_XYLT2	377
cg25594100_FOXK1	377
cg23516854_TMEM232	377
cg26692791_KPNA6	377
cg03834023_PREB,ABHD1	377
cg02453726_RNF14,PCDH12	376
cg07585334_cg07585334_NA	376
cg17858500_C20orf27,HSPA12B	376
cg23485436_KDM4B	376
cg11745355_SPTLC3	376
cg03560973_POMC	376
cg13224852_cg13224852_NA	376
cg18023666_cg18023666_NA	376
cg22825191_cg22825191_NA	376
cg22960833_KDM4B	375
cg07778145_cg07778145_NA	375
cg05845757_TFAP2E,NCDN	374
cg27168291_TAPBP,DAXX	374
cg26632151_SGTA	374
cg01035931_cg01035931_NA	374
cg21813187_cg21813187_NA	374
cg17292610_SAMD8,DUSP13	374
cg23272088_KCNQ1	374
cg05069228_PTPRG	374
cg12294118_cg12294118_NA	374
cg02627682_QSOX1	373
cg13289321_ASB10	372
cg03650119_GUK1,IBA57,GJC2	372
cg23098661_IL17D	372
cg04058752_cg04058752_NA	372
cg23228481_AGPAT1,RNF5	371
cg11803251_LIMCH1	371
cg18832407_RNASE1	371
cg15951661_MAP3K9	371
cg16559259_cg16559259_NA	371
cg24543939_cg24543939_NA	370
cg26645069_MLF2	370
cg00850552_SUMO3	370
cg00211821_MPRIP	370
cg18151410_cg18151410_NA	369
cg22345878_VWF	369
cg02859319_MAPKAPK3	369
cg00511334_EDC4,PSKH1	368
cg14145151_PDZRN3	368
cg25600446_RECQL4,MFSD3,PPP1R16A,GPT	368
cg01027858_cg01027858_NA	368
cg27426151_LRP5	368
cg10609442_NCOR2	368
cg21926619_cg21926619_NA	367
cg21871746_ZKSCAN1	367
cg06480224_cg06480224_NA	367
cg04046238_cg04046238_NA	367
cg00163018_RYR2	367
cg23109867_KCNQ4	367
cg02254461_CSRNP1	366
cg12134349_SLC45A4	366
cg00459617_cg00459617_NA	366
cg25882887_RHOBTB2,PEBP4	366
cg03195795_FOXK1	366
cg09013220_cg09013220_NA	366
cg22688399_FHIT	366
cg12354321_THAP12	366
cg07091544_APOLD1	365
cg11076306_LIMCH1	365
cg17228232_BAIAP2	365
cg13954292_ZFR	365
cg12593873_PIGV,ARID1A	365
cg09744036_NOTUM	365
cg04608651_PTRF	364
cg14935646_cg14935646_NA	364
cg17474422_TFAP2E,NCDN	364
cg01817364_ANXA2R	364
cg12899065_SEPT5	364
cg10786043_TACC1	364
cg13766589_SEC16A,INPP5E	364
cg25356006_GRAMD2	364
cg07864647_FARP1	364
cg14795572_CDK4,TSPAN31,AGAP2-AS1,AGAP2	363
cg19572912_cg19572912_NA	363
cg23178195_FXYD1,FXYD7,LGI4	363
cg21190038_SERF2,MFAP1,HYPK	363
cg21592003_cg21592003_NA	363
cg12179380_cg12179380_NA	363
cg11231701_BPIFB9P,CDK5RAP1	363
cg13884617_HUS1,PKD1L1	363
cg24324628_NHSL1	362
cg06641366_LRRC8C	362
cg08094235_TRAPPC12	362
cg19362196_STMN1	362
cg12676534_DUSP15,TTLL9	362
cg18455390_CYTH1	362
cg21155609_LCK,FAM167B,MTMR9LP	362
cg14178043_CAPN2	362
cg27317046_LTBP2,ISCA2,NPC2	362
cg25590527_GGT1,SNRPD3,LRRC75B	362
cg00448720_C1QTNF9,SPATA13	362
cg16412609_cg16412609_NA	362
cg09366730_ZFYVE28	362
cg22796355_cg22796355_NA	361
cg23412630_PFDN6,RGL2,TAPBP	361
cg12349874_RHOBTB1	361
cg17176676_GNAZ	361
cg26115216_MRPS22	361
cg10134527_TAPBP,DAXX	360
cg21821315_PDE1B,PPP1R1A	360
cg20387392_ZBTB20	360
cg17069437_C7orf61,TSC22D4	360
cg01208614_FCHSD1,ARAP3	360
cg05110828_PTPRG	360
cg08880369_IFT140,TMEM204	360
cg05002602_RDH11,VTI1B	359
cg08049717_AMOTL2	359
cg06143732_cg06143732_NA	359
cg15194531_MAP3K14-AS1,FMNL1	359
cg20591120_MRPL33,BRE	359
cg16171534_CCDC71,KLHDC8B	359
cg00423702_SPDYE21P,PMS2P4	359
cg23640664_MGAT5	358
cg20443451_cg20443451_NA	358
cg27119919_TMEM132A,TMEM109	357
cg04747036_LINC01105	357
cg08639948_COL8A2	357
ENSG00000071994_PDCD2	357
cg20617977_TBC1D1	356
cg27367721_LYRM1,DCUN1D3,ERI2	356
cg25834768_P2RX1,CAMKK1	356
cg08537847_CARMN,MIR143	356
cg08815403_HSD17B13	356
cg16387254_SPRTN,EXOC8	356
cg02331784_ZBTB20,ZBTB20-AS1	356
cg19416326_RNF44	355
cg09890930_GDF11,SARNP	355
cg24872300_POLRMT,HCN2	355
cg00782690_GORASP2	355
cg03281572_VTI1A	355
cg17820871_FBXW8,TESC	355
cg12208899_CRY2,MAPK8IP1	355
cg03441710_THSD4	355
cg13219127_TOLLIP,TOLLIP-AS1	355
cg11366131_DDB2,ACP2,NR1H3	354
cg06618740_TTLL10	354
cg22478679_DCUN1D2,ADPRHL1	354
cg21812476_GLIS1	354
cg10078009_FOXK1	354
cg20851513_cg20851513_NA	354
cg18548288_ZNF766	354
cg11824191_NMNAT2	354
cg16397714_FLT4	354
cg09758273_CTBP1,CTBP1-AS2	353
cg00626702_FAM53A	353
cg27221193_ZBTB46	353
cg24746106_MCF2L	353
cg06099246_cg06099246_NA	353
cg00959922_FOXL1,FOXC2	353
cg01583915_PSMF1,TMEM74B	353
cg26985878_MCRIP1,P4HB	353
cg18487916_GLT8D1,NEK4,SPCS1	353
cg04221624_PALD1	353
cg15630071_cg15630071_NA	353
cg01998345_DDX56,TMED4	352
cg14031381_SEC14L1	352
cg03246478_ADM,AMPD3	352
cg25379549_cg25379549_NA	352
cg11116274_LINC01165	351
cg26003222_SEPT9	351
cg24214471_NNAT,BLCAP	351
cg03130276_CARD14	351
cg25030467_ASB2,MIR4506	351
cg07399960_COBL	351
cg02705758_TRIO	351
cg03603018_RUNX3	351
cg20593826_LINC01135	351
cg11835619_ERBB3	351
cg25431535_A4GALT	351
cg20253105_cg20253105_NA	351
cg08580014_cg08580014_NA	351
cg18325841_ARHGAP21	351
cg01773858_ARHGEF17	350
cg05626376_STK19	350
cg12288473_SALL4	350
cg26921881_cg26921881_NA	350
cg18793198_cg18793198_NA	350
cg05610097_CAMK2B	350
cg27051686_MLPH	350
cg16563470_DNAJC7	350
cg27491557_TUBB2A	349
cg08502159_cg08502159_NA	349
cg04725426_TSC2,PKD1	349
cg04239645_cg04239645_NA	349
cg11671363_CARMN,MIR143	349
cg22451632_cg22451632_NA	349
cg17933407_DNPEP	348
cg03630771_NR2F6,USHBP1	348
cg07996016_BST2	348
cg04245402_PALM	348
cg17807863_TNIP1	348
cg02280038_AUH	348
cg15116918_RPTOR	348
cg26694386_DESI2	347
cg26128121_CACNB1,ARL5C	347
cg04967737_SMOC2	347
cg19816080_cg19816080_NA	347
cg03124514_cg03124514_NA	347
cg21115769_CSPG4,ODF3L1	347
cg05411594_cg05411594_NA	347
cg01978236_NOTCH4	346
cg16341737_MCF2L	346
cg04043052_FAM110B	346
cg09804649_cg09804649_NA	346
cg11755933_CDK2AP2,AIP,PITPNM1	346
cg03613433_cg03613433_NA	346
cg23417171_cg23417171_NA	346
cg25958716_HIBCH	346
cg13347354_SLC20A2,VDAC3	345
cg02697519_CASZ1	345
cg10007534_FAM207A	345
cg15854394_PEBP4	345
cg27006914_RNF216	345
cg03862380_cg03862380_NA	345
cg02283487_KLHL33	344
cg08688548_CPEB1	344
cg10093739_MRPL10,SCRN2,SP6,LRRC46	344
cg07224931_MLEC	344
cg13127506_CDK2AP1	344
cg09835878_cg09835878_NA	344
cg13793782_RALGDS	343
cg16779580_RAB11FIP4	343
cg00100538_WWC2	343
cg26218277_JARID2	343
cg05700616_cg05700616_NA	343
cg04585390_SLC5A10,GRAP	343
cg05641535_PRDM16	343
cg08276042_KCTD5	343
cg26987699_GATA6-AS1,GATA6	343
cg05923197_BMP4	342
cg23979832_BAIAP2	342
cg12737536_cg12737536_NA	342
cg02068171_ABLIM1	342
cg19636672_GLS2	342
cg04596539_RAE1,RBM38	342
cg02865033_TRIM72	342
cg04682967_cg04682967_NA	341
cg17118391_cg17118391_NA	341
cg02968918_STOX2	341
cg21483999_GRAMD2	341
cg08324090_ACAP1,KCTD11	341
cg26049390_RDH10-AS1	341
cg24715272_cg24715272_NA	341
cg17927583_ANXA3	341
cg06367286_GNA12	341
cg02317832_ASB18	341
cg10497894_BEST1,FTH1	341
cg16575319_cg16575319_NA	341
cg18191092_cg18191092_NA	341
cg08619669_GYS1,RUVBL2	340
cg18064256_ERCC1,CD3EAP,PPP1R13L	340
cg01520588_MDFI	340
cg16151082_PLEKHF2	340
cg17296483_WIZ,RASAL3	340
cg21515023_cg21515023_NA	340
cg07213181_RAMP1	340
cg17816637_SLC7A4,P2RX6,P2RX6P	340
cg21481937_PTPRR	340
cg22031706_LINGO1	340
cg14752965_RAI1	340
cg19055098_SCN8A	339
cg19343518_ARID1B	339
cg21660452_NRXN2	339
cg00871787_NOTUM	339
cg21201294_TNS3	339
cg14703589_LIMK2	339
cg03969515_RSG1,ANO7L1	339
cg16208053_CYP2E1,SPRN	339
cg27425228_TBC1D22A	339
cg02898412_C8orf49,GATA4,NEIL2	339
cg15085024_ZNF318	338
cg27230594_cg27230594_NA	338
cg08112356_FOXJ2	338
cg13777984_ENOX1	338
cg02864619_RPTOR	338
cg03425609_cg03425609_NA	338
cg06991955_TSC2	338
cg15117681_CSNK1D,SLC16A3	337
cg10950111_GJC2,GUK1	337
cg23220346_ARPP21	337
cg27504991_MRPL2,KLC4,CUL7	337
cg13401014_FLI1,SENCR	337
cg25916044_YAE1D1	337
cg09772333_ARHGEF1	336
cg11377642_KIF26B	336
cg02551745_LINC00881	336
cg04143120_P2RY6	336
cg00270625_CPT1B,CHKB-AS1,CHKB	336
cg25514304_PSEN2	336
cg24867468_TMC6,TNRC6C-AS1,TNRC6C	336
cg15848364_NTM	336
cg25238189_STK32C	336
cg18305324_PRRC2A	336
cg13727089_CCDC180	336
cg06218285_CD40	336
cg06350196_PANK4,PLCH2	336
cg06978117_COLCA1	336
cg08299089_LTBP2	336
cg05830220_KLHDC4	335
cg03635578_MMP15	335
cg23313665_SH2D3C	335
cg11237852_cg11237852_NA	335
cg25840318_SH3TC1	335
cg03103944_PSMG3,PSMG3-AS1,TMEM184A	335
cg20436037_EIF6	335
cg03406778_PSMG3-AS1,TMEM184A,PSMG3	335
cg00510507_ANK3	335
cg08654262_DDAH1	335
cg03141526_cg03141526_NA	335
cg18644286_AURKC,ZNF805	335
cg27390009_FLII,LLGL1	334
cg15959205_TTC7B	334
cg09957864_MFSD3,PPP1R16A,GPT,RECQL4	334
cg11911653_cg11911653_NA	334
cg10514113_TBCD	334
cg09581611_SLC12A4,LCAT,PSMB10	334
cg01445163_ARL4D	334
cg12246644_SPECC1	334
cg14171369_cg14171369_NA	334
cg13689699_RXRA	334
cg10381888_cg10381888_NA	334
cg08032525_THPO,EIF2B5,CHRD	334
cg27074995_JAK3	334
cg04729004_KCP	334
cg22657492_GFRA3	334
cg03163759_ANKRD11	334
cg23664396_ID3	333
cg08775835_PRSS36,KAT8	333
cg16204066_ITPR3	333
cg04093645_FBN2,SLC27A6	333
cg14266237_MAST1,DNASE2,GCDH,RPS6P25	333
cg18842310_MCF2L-AS1,MCF2L	332
cg11715789_RUFY1,HNRNPH1	332
cg03722802_ZNF593,CNKSR1,FAM110D	332
cg12533658_STARD3	332
cg02434880_cg02434880_NA	332
cg16444062_PRSS27	332
cg08115732_SYNGR2,TK1	332
cg04286438_cg04286438_NA	332
cg12516875_MIRLET7BHG	332
cg01340991_SYNGAP1	332
cg01017926_ZNF785,ZNF688	332
cg03490289_cg03490289_NA	332
cg06875179_SKI	332
ENSG00000171311_EXOSC1	332
cg27345762_CRHR2,INMT	331
cg15213650_KDM4B	331
cg14093103_NFIA	331
cg04790574_RNF207,ICMT	331
cg16136290_FAM212B-AS1,FAM212B	331
cg27019645_NFATC1	331
cg25265519_ARHGEF7	331
cg01806238_SEPT4,SEPT4-AS1,MTMR4	331
cg03981074_VWA5B2,ECE2,ALG3,EIF2B5	331
cg21475150_RPL31,TBC1D8,NPAS2	331
cg14362370_EXOSC2,ABL1	331
cg03721058_RASSF1	331
cg25084851_SLC9A3	331
cg26643047_ATP6V1E2	331
cg05634040_SBNO2	331
cg20818806_COL4A1	331
cg22682161_cg22682161_NA	331
cg02988755_COL4A1	331
cg11746396_CACHD1	331
cg26688936_TSC2,PKD1	331
cg22428691_CAPN2	330
cg14216672_PRDM16	330
cg20263392_MEGF6	330
cg25598376_MRPS25,NR2C2	330
cg00993308_cg00993308_NA	330
cg14261395_SETX	330
cg10136214_GINS3	330
cg07611575_NLRC3,CLUAP1	330
cg25706257_ACOT7	330
cg24712354_LIPE-AS1,LIPE	329
cg09056327_cg09056327_NA	329
cg05896714_EPN2,B9D1	329
cg01314391_FAM207A	329
cg26043567_SNF8,UBE2Z	329
cg19220566_VARS	329
cg27141176_cg27141176_NA	329
cg14976391_CBL,MCAM	329
ENSG00000152147_GEMIN6	329
cg09484852_ZDHHC14	328
cg17454746_OPRL1,RGS19	328
cg13713989_PRKAR2A,IP6K2	328
cg23801272_LINC00689,VIPR2	328
cg02941741_NGEF	328
cg02398629_cg02398629_NA	328
cg13808936_cg13808936_NA	328
cg07264904_MCF2L	328
cg09629631_CACNA2D4	328
cg02356640_MOB2	328
cg27178772_PNRC1	328
cg14239307_CYP2E1,SPRN	328
cg18864179_cg18864179_NA	327
cg15504047_NRARP	327
cg09499482_USP3,USP3-AS1,FBXL22	327
cg04590303_IFT140,TMEM204	327
cg27056016_SEC14L1	327
cg08137669_LYNX1	327
cg06084073_PAK6,C15orf56	327
cg27509823_RC3H1	327
cg23892390_cg23892390_NA	327
cg05241828_PPP1R16A,GPT,MFSD3,RECQL4	326
cg27539733_C16orf95	326
cg03094083_UNC119	326
cg19211880_AMOTL2	326
cg20940044_VEGFA	326
cg08721491_STK19	326
cg20285026_PRKCZ	326
cg17053854_SEPT9	326
cg09063149_THEM4	326
cg09246749_HMGN3	326
cg21503345_R3HDM2	326
cg02548132_MCPH1,ANGPT2	326
cg22918700_EMC9,PSME1,FITM1,DCAF11	325
cg13389652_DOHH	325
cg11651007_PCNT	325
cg06849167_DAGLA	325
cg12169568_FOXN3	325
cg15483084_ADAP1,COX19	325
cg23687098_cg23687098_NA	325
cg09944659_FAM101A	325
cg22941668_CARMN,MIR143	325
cg01026256_ALG3,VWA5B2,ECE2,EIF2B5	325
cg01142668_SLC9A3R2,NTHL1	325
cg18860868_FBXO21,TESC-AS1	325
cg12335110_cg12335110_NA	325
cg20966426_HPCAL4,PPIE	325
cg10752190_cg10752190_NA	325
cg11599864_BTBD9	325
cg14166756_GABARAPL3,ZNF774	325
cg17073859_EDNRA	325
cg06664465_KIF22	325
cg15197135_ARHGEF1	325
cg13804171_PALM2-AKAP2,AKAP2	324
cg19026231_ITGB4,GALK1	324
cg06024540_AGPAT1	324
cg12546785_RAI1	324
cg00458949_cg00458949_NA	324
cg18944099_BAG6	324
cg03009240_DOHH,FZR1	324
cg27389454_BRSK1,HSPBP1	324
cg07364154_ACAT1,NPAT	324
cg02867242_cg02867242_NA	324
cg19939503_CAPN2	324
cg05034374_PDE11A	324
cg01631064_KBTBD13,UBAP1L,RASL12	324
cg25106791_CARD11	324
cg27447219_STK24	324
cg08482167_PHACTR2	323
cg02214783_LRRC47,SMIM1,CCDC27	323
cg21813747_NBL1	323
cg11572080_TRAF3IP2-AS1,TRAF3IP2	323
cg20817822_CD46,C1orf132	323
cg02090418_ALPK1	323
cg15997315_DNAH10	323
cg08857194_RBFOX3,ENGASE	323
cg04914996_cg04914996_NA	323
cg27616751_CLDN15,FIS1	323
cg20999755_CAMTA1	323
cg06434709_GIPC3,TBXA2R	323
cg18279134_FAM131C	323
cg01320579_SEPT9	322
cg01727686_VEGFB,FERMT3,TRPT1,NUDT22,DNAJC4	322
cg00317626_SLC1A7	322
cg05324273_UBE2D1	322
cg08649068_RARA	322
cg03946671_TCEA2	322
cg25793736_STX18-AS1	322
cg23667108_MAD1L1	322
cg22016995_CDHR5,PHRF1,IRF7	322
cg00674220_cg00674220_NA	322
cg18089519_PDDC1,TALDO1	322
cg04497889_TADA2B,CCDC96	321
cg26860257_ERF,GSK3A	321
cg06715661_KCNN1	321
cg00025331_ZEB2	321
cg17466952_RHOBTB2,PEBP4	321
cg25636075_TMEM41A,LIPH	321
cg11018338_OIT3,MCU	321
cg27380459_ZDHHC24	321
cg08688317_cg08688317_NA	321
cg10826043_cg10826043_NA	321
cg16523463_MYL2	320
cg03172688_PCDH1	320
cg05540913_cg05540913_NA	320
cg09262100_CDC42BPB	320
cg05542406_cg05542406_NA	320
cg03286774_SPG7	320
cg16457797_GRK6	320
cg20159839_cg20159839_NA	320
cg11807040_GUCY1B2	320
cg24272254_COX19,ADAP1	320
cg11530289_RRS1,ADHFE1,RRS1-AS1	319
cg03972219_ALOX15	319
cg21376799_cg21376799_NA	319
cg00386405_ZNF536	319
cg05590233_cg05590233_NA	319
cg08029969_cg08029969_NA	319
cg23718195_cg23718195_NA	319
cg01308419_GRID2IP	319
cg21950605_ABR	319
cg14789214_KCNIP2-AS1,KCNIP2	319
cg24129193_ACAN,HAPLN3	319
cg10205310_cg10205310_NA	319
cg10735607_TMEM109,PRPF19	319
cg01212848_ABLIM1	319
cg27406150_IFFO1,GAPDH,NOP2	319
cg23553576_SYTL2	319
cg24780883_TMEM221,NXNL1	319
cg07315493_TMEM204,IFT140	318
cg07575680_AP5B1	318
cg06289725_cg06289725_NA	318
cg19063834_FAM134B	318
cg00622010_AQP1	318
cg11580790_PI4K2A,HOGA1,C10orf62	318
cg15820955_HDAC7	318
cg02180979_CDH23,PSAP	318
cg02925872_cg02925872_NA	318
cg26537335_CHST11	318
cg27222785_C1orf159	318
cg27607805_CDCA5,NAALADL1	318
cg27658601_ZNF750,TBCD	318
cg10809282_ASAP2	318
cg01875838_DNM2,TMED1,C19orf38	318
cg02100410_PCGF1,LBX2,TTC31,LBX2-AS1	317
cg04566694_H6PD	317
cg10380312_ARHGEF7	317
cg15618758_ARID1B	317
cg14278057_IFITM10,CTSD	317
cg01139503_cg01139503_NA	317
cg25930146_EGR3	317
cg03710889_SLC11A1	317
cg07959609_EPHA2	317
cg05434287_MAD1L1	317
cg01301117_MAD1L1	317
cg01644592_cg01644592_NA	317
cg12933431_ATP10A	317
cg04035828_SNX29	317
cg02686793_cg02686793_NA	317
cg07707505_TNFRSF8	317
cg15516226_BTNL9	317
cg25651118_C5orf63	317
cg18702278_PDE6B	317
cg11936410_TPM1	316
cg27530370_ADAR	316
cg07251141_ADAM12	316
cg09586198_cg09586198_NA	316
cg18278519_cg18278519_NA	316
cg05592483_cg05592483_NA	316
cg09740775_PRC1,VPS33B	316
cg01852522_cg01852522_NA	316
cg22902089_CREB3L1	316
cg02183564_CCDC146	316
cg05657213_ZNF843	316
cg15694113_cg15694113_NA	316
cg22607220_GADD45B	316
cg25567448_NEURL3	316
cg10961323_GALE,LYPLA2,HMGCL	315
cg14485744_EXT1	315
cg01770296_MIA3	315
cg10716120_PLCH2	315
cg22169791_NOX5	315
cg06470424_CSNK1G2	315
cg12389611_DGKZ,CREB3L1	315
cg22275125_cg22275125_NA	315
cg25683744_NINJ2,B4GALNT3	315
cg18864926_CCNK,CCDC85C	315
cg02119577_ETS2	315
cg22603555_SH3PXD2A	315
cg24591969_KCNAB2	315
cg13877715_KIAA0319L	315
cg09084279_FSCN2,ACTG1	315
cg01772149_PRDM16	315
cg26843110_CLK3,EDC3	314
cg00452882_CARMIL2,PARD6A,ENKD1,ACD	314
cg23243608_NCBP2-AS2,NCBP2,NCBP2-AS1,PIGZ	314
cg07785717_CACNG8	314
cg20739984_AMMECR1L	314
cg11134777_INTS1	314
cg20630740_cg20630740_NA	314
cg21533544_IRF2	314
cg01375124_KCNQ5	314
cg24204951_PER2	313
cg07979757_KCNQ1	313
cg21127079_COLCA1	313
cg00219303_TRIOBP	313
cg01557549_RFT1	313
cg09626299_TSPAN14	313
cg15708405_LINC01431,NXT1,GZF1	313
cg09569989_TBC1D1	313
cg23467079_cg23467079_NA	313
cg09471587_cg09471587_NA	312
cg13659914_NOTCH1	312
cg04798016_MAP3K11,PCNX3	312
cg24105269_CABP1	312
cg12945194_PPP2R5B	312
cg01756421_PSKH1,EDC4	312
cg10442355_LINC01301	312
cg17166338_cg17166338_NA	312
cg12658012_cg12658012_NA	312
cg26993132_LINC00304,CDH15	312
cg15696968_cg15696968_NA	312
cg16992870_cg16992870_NA	312
cg01477933_cg01477933_NA	312
cg11691189_KCNK12,MSH2	312
cg03357547_SHANK1,C19orf81,SYT3	311
cg10930027_NDUFS3,KBTBD4,FAM180B,C1QTNF4	311
cg22825473_FAM101A	311
cg20484322_CHKA,TCIRG1	311
cg08070200_FAT1	311
cg18792041_ANO9	311
cg16398133_KCNK3	311
cg25930644_MYH10	311
cg04395377_cg04395377_NA	311
cg13928313_GNA12,AMZ1	311
cg27490391_LHFP	310
cg06954855_C1orf204,SLAMF8	310
cg09370594_C19orf35	310
cg07046870_PDIA5	310
cg10873171_AEBP1,POLD2	310
cg06318402_cg06318402_NA	310
cg20202112_DCTN1	310
cg26837372_STK19	310
cg13807886_cg13807886_NA	310
cg12184421_CD247	310
cg03276982_EXT1	310
cg14263070_MEGF6	310
cg06978288_CCDC158,STBD1	310
cg22706147_VASP,OPA3	310
cg05823029_GRK1	310
cg26289436_TEAD2,CD37	310
cg12528597_RTN4RL2	310
cg17881600_cg17881600_NA	310
cg26889677_cg26889677_NA	310
cg02361027_LRP2	310
cg02621481_DLEU1	309
cg08850641_cg08850641_NA	309
cg12115081_DCLK2	309
cg02437766_ARL15	309
cg19777396_KIF26A	309
cg08012287_ZDHHC24	309
cg10411087_cg10411087_NA	309
cg10095801_EVA1C	309
cg01495363_SH3RF3,SH3RF3-AS1	309
cg21138550_HIC1,SMG6	309
cg17073023_SLC35F2	309
cg20608348_SPON2,CTBP1	309
cg24148133_cg24148133_NA	309
cg17606548_MAST4	309
cg09125300_PDLIM2	308
cg17533927_KCP	308
cg15651345_CNKSR1,FAM110D,ZNF593	308
cg08326019_PLPPR2,CCDC159	308
cg24707486_cg24707486_NA	308
cg06431347_SH3BP4	308
cg23767840_EPN2	308
cg02443652_STARD7-AS1,TMEM127	308
cg26192720_NXF1,TAF6L,TMEM179B,TMEM223	308
cg19044229_MAP3K11,PCNX3	308
cg02285386_TOM1,HMGXB4	308
cg15635633_cg15635633_NA	308
cg24251800_SPOP	308
cg21224972_HTRA3	308
cg16653901_SKP1	308
cg02959364_MEGF6	308
cg01971590_NCALD	308
cg12799666_PDIA3,SERF2	308
cg23641264_JRK	308
cg19860734_PACRG,PACRG-AS3	307
cg23133355_cg23133355_NA	307
cg11023456_C21orf2	307
cg08078058_RAB4B,CYP2T1P,EGLN2	307
cg23192614_MCF2L	307
cg01607932_BHLHE40,BHLHE40-AS1	307
cg20373544_cg20373544_NA	307
cg08568550_cg08568550_NA	307
cg13858407_SH3BP4	307
cg12756897_APBA2	307
cg07015256_cg07015256_NA	307
cg10584766_PRKACA,SAMD1	307
cg23193616_KLC1,ZFYVE21,XRCC3	307
cg14543966_FBXW2	307
cg06755717_DLK1	307
cg03723716_PPP2R1B,SIK2	307
cg02050917_SKI	306
cg05397809_URGCP,MRPS24	306
cg12671565_CACNA2D4,ADIPOR2	306
cg24766041_USHBP1,BABAM1	306
cg19911801_PLCH2,PANK4	306
cg06672008_KLHDC4	306
cg11967457_LEFTY2	306
cg06231385_FOXK1	306
cg11314598_ABR	306
cg15535174_SOGA1	306
cg01521274_SIPA1L1	306
cg13817802_AGPAT2	306
cg05539369_FNIP2	306
cg09717146_cg09717146_NA	306
ENSG00000271320_AC091488.1	306
cg17326451_TP53TG1,CROT	306
cg14818279_SH3TC2	305
cg25927444_TTC7A	305
cg22502492_ZNF436-AS1,ZNF436	305
cg09508434_STARD4-AS1	305
cg18641463_MAD1L1	305
cg24878594_FBXO2,FBXO44	305
cg09126090_FNDC10	305
cg15576517_STXBP2	305
cg14710529_ASAP2	305
cg07524398_CBX6	305
cg14637470_SH3GLB2,MIGA2	305
cg03146219_NADSYN1	305
cg01829163_SLC7A5	305
cg20501434_cg20501434_NA	305
cg01418539_cg01418539_NA	305
cg21034405_cg21034405_NA	305
cg12172720_SYNPO	305
cg23201907_cg23201907_NA	305
cg18272461_AGRN	305
cg14204600_TRMT61A	305
cg09281580_cg09281580_NA	305
cg01081346_CPT1B,CHKB-AS1,CHKB	304
cg15421321_JAG2	304
cg26940100_C1orf145,OBSCN	304
cg02710534_PCDH1	304
cg01521060_DGAT2	304
cg07733567_EPN2,B9D1	304
cg01546047_SPON2	304
cg27582013_CROCC	304
cg21757872_BTBD11	304
cg14601444_DCTN1	304
cg00260012_cg00260012_NA	304
cg13074813_TMCC2	304
cg02281038_IL27RA	304
cg16659284_SNX29	304
cg26646118_DAXX,TAPBP	304
cg05500240_SPIRE2	304
cg26381970_cg26381970_NA	304
cg20302497_D2HGDH	304
cg24942458_SLC7A10	304
cg05068777_SND1	304
cg13562102_USP42,CYTH3	304
cg16610412_FSTL4	304
cg19285532_NUCB1,TULP2	304
cg00663183_BTD	304
cg20257821_cg20257821_NA	304
cg01190109_PLEKHM3	303
cg03748603_cg03748603_NA	303
cg14962509_NCDN,TFAP2E	303
cg27195304_TIMM50	303
cg13527233_GNA11	303
cg23947919_ULK1,PUS1	303
cg09216381_MFN2,PLOD1	303
cg10960266_VGLL4	303
cg27485619_CTBP2	303
cg23681687_cg23681687_NA	303
cg08639279_ROBO4	303
cg23810282_ANXA2R	303
cg07854959_cg07854959_NA	303
cg13285698_TRAPPC9	303
cg18270343_JRK	303
cg24168413_FXYD7,FXYD1,LGI4	303
cg16773028_KCNA2	303
cg01035035_BAALC,BAALC-AS1	303
cg13326914_LRRC66	303
cg23435915_ANXA2R	303
cg01807313_FBXW8	303
cg15526213_cg15526213_NA	303
cg02891686_SOD3,CCDC149	303
cg13322449_cg13322449_NA	303
cg12589308_ATP8B3,REXO1	303
cg11944284_SLC22A18AS,CDKN1C	302
cg05879496_SHCBP1,RAB43P1	302
cg07482916_TMEM88,CYB5D1,NAA38,KDM6B	302
cg12067421_LINC01353,CHIT1	302
cg06224178_ASAP1	302
cg23859051_SLC43A2	302
cg27574071_CTBP1	302
cg00726151_cg00726151_NA	302
cg23072629_PER2	302
cg05397010_PLA2G4F,VPS39	302
cg02584678_NOTCH3	302
cg14478475_SLC25A51	302
cg14211055_YBEY,MCM3AP	302
cg11409510_PRICKLE1	302
cg03365520_SPTBN1	302
cg10357060_cg10357060_NA	302
cg15111629_RGS12	302
cg07689252_D2HGDH	302
cg11032623_cg11032623_NA	302
cg00036871_INHA,OBSL1	301
cg13537237_cg13537237_NA	301
cg20076516_MIRLET7BHG	301
cg26897909_cg26897909_NA	301
cg01871498_ROGDI,SMIM22,GLYR1	301
cg14705010_NUMA1,IL18BP	301
cg21929464_cg21929464_NA	301
cg07891658_BANP	301
cg13762244_CAPN1	301
cg05018835_RPS6KA5	301
cg24837397_CUX1	301
cg10187479_cg10187479_NA	301
cg15107724_TFAP2E	301
cg11668529_NEU4	301
cg19517841_cg19517841_NA	301
cg11197258_NCOR2	300
cg11949335_TTC22	300
cg12811617_AHNAK2,C14orf79	300
cg13178361_UAP1	300
cg04350571_LYNX1	300
cg04839409_CTBP2	300
cg11523350_BACE1	300
cg08996445_IL34,MTSS1L	300
cg07617283_cg07617283_NA	300
cg08820507_WIPI2	300
cg18015026_MINK1	300
cg15530351_ANGPT2,MCPH1	300
cg11862665_MBNL2	300
cg19450056_cg19450056_NA	300
cg08266311_TBC1D1	300
cg14583406_cg14583406_NA	300
cg22584911_TMOD3	300
cg22800743_CASC15	300
cg24676384_PBXIP1,SHC1,PYGO2	300
cg03130962_CCHCR1,PSORS1C1	300
cg22815118_MOB2	300
cg09687907_MBD6,MIR616,DCTN2,MARS,DDIT3	299
cg08224159_AKAP12	299
cg04738220_EPS15L1	299
cg00183886_USP46,USP46-AS1	299
cg01248385_MCF2L	299
cg18852430_OSBPL2	299
cg21960624_SCGB2B2	299
cg16891075_cg16891075_NA	299
cg21287519_SGSM2	299
cg12354056_cg12354056_NA	299
cg00004996_MTMR7	299
cg07370315_cg07370315_NA	299
cg00793946_PRKCE	299
cg14345676_HRH2	299
cg12257170_DOT1L,PLEKHJ1	299
cg18932158_RPS18,VPS52,PFDN6	299
ENSG00000141642_ELAC1	299
cg00328284_ANK1	298
cg18202834_SIPA1L2	298
cg12910268_DNAJB6	298
cg20531550_KCP	298
cg12683410_STK35	298
cg18533966_cg18533966_NA	298
cg09386265_MUM1	298
cg19615684_CD9	298
cg16434940_cg16434940_NA	298
cg27508046_ATP6V0A2,DNAH10	298
cg00015639_NRL,PCK2,CPNE6	298
cg16762386_NR0B2,NUDC	298
cg06801994_PCID2,PROZ	298
cg16954577_TNFRSF11A	298
cg17501774_ZNF697	298
cg10625666_SLC39A10	298
cg16450309_EIF5A2	298
cg10546977_ZSWIM4	298
cg00526835_cg00526835_NA	298
cg02674465_FOXK1	298
cg08461425_cg08461425_NA	298
cg13332807_cg13332807_NA	298
cg10531073_SLC16A8,BAIAP2L2	298
cg03152084_C16orf95	298
cg25632840_cg25632840_NA	298
cg26888672_OBFC1	298
cg02112229_HS3ST3B1	297
cg21659910_TNNT3	297
cg10865498_SRC	297
cg02835964_cg02835964_NA	297
cg08661112_PANK1	297
cg21495715_SLC5A10	297
cg14808739_SREBF1,TOM1L2	297
cg27629145_ATF6B	297
cg15270970_INMT	297
cg14534144_TMCO3,DCUN1D2	297
cg21401517_PI4KB	297
cg27084736_cg27084736_NA	297
cg01676844_NUBP2,SPSB3,MAPK8IP3,EME2,MRPS34,NME3	297
cg00326131_RTKN	297
cg26282299_DENND3	297
cg10786870_ZNF224,ZNF225	297
cg21386766_CRADD	297
cg16072884_KIAA1462	297
cg10369594_PRRC2A,BAG6	297
cg20080878_cg20080878_NA	297
cg19264522_PLXDC2	297
cg26734040_APOA1,APOA1-AS,SIK3	297
cg15241471_CXXC1,MBD1	297
cg08730245_MAP3K12,TARBP2,ATF7	296
cg16311186_SLC37A3	296
cg22822630_USP12	296
cg06488678_TMPRSS9	296
cg02998129_SLC4A1	296
cg15561778_GAB1	296
cg05390307_FEZ1	296
cg02260710_GINS2,C16orf74	296
cg22601300_FGD5	296
cg17284168_SGK1	296
cg05663031_BCL6	296
cg08214329_IFT140,TMEM204	296
cg19090784_cg19090784_NA	296
cg11728519_SEMA4F,M1AP	296
cg24394097_KCNAB1	296
cg24068761_KCNAB2	296
cg19864468_CHCHD5	296
ENSG00000279088_AC022400.7	296
cg26541780_SMG5,BGLAP,PMF1,PAQR6	295
cg13268590_MAGI1,MAGI1-IT1	295
cg11383208_MIRLET7BHG	295
cg17977470_KDM6B,TMEM88,CYB5D1,NAA38	295
cg01242196_cg01242196_NA	295
cg07280272_DLL4	295
cg13483263_MPDU1,SOX15,FXR2	295
cg14326991_ADGRF5	295
cg19375196_TBKBP1	295
cg09295050_RDH5,BLOC1S1,ITGA7	295
cg08721931_NPHP1,MALL	295
cg24353272_TGFB2-AS1,TGFB2,RRP15	295
cg09441223_LMF1	295
cg15852534_cg15852534_NA	295
cg00149684_EFNA1	295
cg10853830_CDK2AP2,AIP,PITPNM1	295
cg22455720_TBCD	295
cg20154816_PKNOX1	295
cg04365777_SLC8A1	295
cg25734421_HHAT	295
cg13419087_NCOR2	294
cg02462868_HOXB7	294
cg16823009_ZNF827	294
cg03025337_ZNF470	294
cg11643099_FAM110D	294
cg02479744_ATXN1,GMPR	294
cg13004635_SLC9A3	294
cg04864152_EPN2,B9D1	294
cg06458238_TSEN54,TMEM94,CASKIN2	294
cg13792913_SCN4B,SCN2B	294
cg25068071_cg25068071_NA	294
cg04199256_ACE	294
cg20622410_JUP	294
cg00291661_ZNF785,ZNF688	294
cg03549739_cg03549739_NA	294
cg19741777_KCNJ14,GRWD1,CYTH2	294
cg00806138_LINC01389	294
cg26185859_BCL11A	294
cg10897459_cg10897459_NA	294
cg01381934_STAB1,NISCH	294
cg17457014_TTC22	293
cg17268233_TNNT3	293
cg09642740_FAM49B	293
cg23848712_PTPRA,MRPS26	293
cg18788664_HLX	293
cg11117717_AP4S1,HECTD1	293
cg13130022_cg13130022_NA	293
cg09308639_TMEM182	293
cg00979553_cg00979553_NA	293
cg17804611_cg17804611_NA	293
cg08120023_ATP1A1-AS1,ATP1A1	293
cg14571493_EGF	293
cg00222053_cg00222053_NA	293
cg12912245_cg12912245_NA	293
cg16153294_H19,MRPL23-AS1	293
cg02576915_ZMPSTE24,COL9A2	293
cg01235116_SNX20	293
cg04584009_REXO1	293
cg24022152_MICAL2	293
cg12814335_PITPNA,SLC43A2	293
cg06391412_FOXP1	293
cg27483455_ASIC1,SMARCD1	293
cg18458689_HIVEP2	293
cg26340147_cg26340147_NA	293
cg19199590_BSCL2,HNRNPUL2-BSCL2,LRRN4CL	293
cg15975171_cg15975171_NA	293
cg23247185_GRIP2,SLC6A6	293
cg15348609_SFSWAP	293
cg02426376_FOXD3-AS1,FOXD3	293
cg19940077_cg19940077_NA	292
cg11882053_RB1,PPP1R26P1	292
cg19788250_APP	292
cg24376793_PPP1R12B	292
cg04984663_cg04984663_NA	292
cg05104283_SEPT9	292
cg27436259_KAT8,PRSS36	292
cg26190476_PPM1J	292
cg22780475_cg22780475_NA	292
cg03986574_SF1	292
cg07783666_REXO1,ATP8B3	292
cg03249863_MARCH9,CDK4,CYP27B1,TSPAN31	292
cg08122051_WWOX	292
cg19811076_cg19811076_NA	291
cg12859054_TG	291
cg09779027_INSR	291
cg06531741_cg06531741_NA	291
cg20567768_PHYHIP	291
cg16299159_MCF2L	291
cg26776806_CBFA2T3	291
cg09740313_cg09740313_NA	291
cg23875758_SREBF1,RAI1	291
cg08642731_C10orf71-AS1,C10orf71	291
cg06503456_ABCC1	291
cg10520099_SLC7A5	291
cg05361553_ERICH1	291
cg18746357_RELA	291
cg15474435_COL6A6	291
cg16539346_MEN1,MAP4K2	291
cg20546777_RPL13AP20	291
cg21339084_LIMS2	290
cg17174764_HNRNPUL2-BSCL2,BSCL2,LRRN4CL	290
cg06221946_MARCKSL1,HDAC1	290
cg25318211_MICAL1,ZBTB24	290
cg20277126_MEGF6	290
cg13026773_ABHD17C	290
cg22304662_ZBTB47,NKTR	290
cg23095556_CCDC124	290
cg23279833_RNF157	290
cg18607411_SPRY2	290
cg04482817_CCDC30,PPIH	290
cg10314807_PLEKHB1	290
cg03128167_IGF2-AS,IGF2	290
cg07841762_AP4M1,TAF6,MCM7	290
cg13953753_SHTN1	290
cg13432205_STK32C	290
cg00510160_cg00510160_NA	290
cg26954197_AHRR,EXOC3,EXOC3-AS1	290
cg04312620_SALL4	290
cg14484885_ANKRD10,ANKRD10-IT1	290
cg21715431_MYO1F	290
cg05043716_DOCK5	289
cg01720722_CDK18	289
cg13856812_cg13856812_NA	289
cg05517976_cg05517976_NA	289
cg07584855_HLX	289
cg01981417_DEFB124,REM1	289
cg00444059_COX6A2,ITGAD,ZNF843	289
cg15115984_KLF16,ABHD17A	289
cg04204526_PRDM16,LINC00982	289
cg12976832_ZNF317	289
cg17918556_CERS6	289
cg14614094_EXOSC2	289
cg25726549_IQCJ-SCHIP1	289
cg25373579_VEGFA	289
cg04359418_cg04359418_NA	289
cg02497559_MRPL38,FBF1	289
cg21373156_cg21373156_NA	289
cg11011533_ITGAE	289
cg06754513_FZD1	289
cg02021641_TMEM88,CYB5D1,NAA38,KDM6B	289
cg03062587_ABR	289
cg11738486_TRIP10,SH2D3A,GPR108	288
cg19180056_IGSF9B	288
cg01658815_ABLIM1	288
cg13456241_RBPMS	288
cg11135108_SHC1,PBXIP1,PYGO2	288
cg26116551_ZNF536	288
cg08183663_cg08183663_NA	288
cg14096569_DAXX,TAPBP	288
cg10588310_PRDM16	288
cg22846991_cg22846991_NA	288
cg01263631_ZNF469	288
cg08024169_cg08024169_NA	288
cg15961693_CITED2	288
cg18977283_cg18977283_NA	288
cg04623270_CFAP20	288
cg06226724_IL11RA,GALT	287
cg05881697_HPF1	287
cg14471064_GPSM1	287
cg23801168_NAV1	287
cg00539360_VEGFA	287
cg11666770_ARHGEF1	287
cg13709211_MEG3	287
cg02842869_NOTUM	287
cg24067150_cg24067150_NA	287
cg10627737_COL4A2	287
cg14743708_LEMD2	287
cg09499136_SMOC2	287
cg15673069_MAMSTR,RASIP1	287
cg26422762_MIRLET7BHG	287
cg01824172_TBXAS1,HIPK2	287
cg16765393_GNA12	287
cg11348372_HNRNPA1P66,WDPCP	287
cg18575532_STARD3,PPP1R1B	287
cg27063572_cg27063572_NA	287
cg01096640_APCDD1L	287
cg19721065_cg19721065_NA	287
cg22177451_cg22177451_NA	287
cg10154010_RNPS1,ABCA3	287
cg17335494_LTBP2	287
cg12852390_DDX46,C5orf24	287
cg16848154_CPXM1	287
cg20143970_DUSP22	287
ENSG00000100938_GMPR2	287
cg25755804_cg25755804_NA	287
cg12587213_cg12587213_NA	286
cg03837313_SLC43A3	286
cg11392776_PCNX3,MAP3K11	286
cg04689178_TIMP2,CEP295NL	286
cg20419110_TJAP1,LRRC73,POLR1C,YIPF3	286
cg23092680_cg23092680_NA	286
cg19765281_AKAP8,AKAP8L	286
cg25751484_ZSWIM4	286
cg27322863_TANGO6	286
cg10703481_DNHD1	286
cg00150520_RNF220	286
cg11376339_COX7A2L	286
cg02661728_cg02661728_NA	286
cg04399988_THTPA,ZFHX2	286
cg04731084_KIF26A	286
cg08323540_GABRP	286
cg22496729_TAC4	286
cg16208258_LINGO1	286
cg04952072_PGF	286
cg10068572_CCNY	286
cg23621631_RIPK3,ADCY4	286
cg03179291_CAMKK1,P2RX1	286
cg16142957_cg16142957_NA	286
ENSG00000095464_PDE6C	286
cg16874095_EGLN3	285
cg25002649_MRPL2,KLC4,CUL7	285
cg15007228_SKI	285
cg16258569_ADGRL2	285
cg05237114_FAM110B	285
cg25736663_cg25736663_NA	285
cg27412975_TRPC3	285
cg25750507_HOXB3,HOXB6,HOXB7	285
cg22738655_cg22738655_NA	285
cg03010018_APOA1,SIK3,APOA1-AS	285
cg03776082_CXCR4	285
cg10110933_SAMD8,DUSP13	285
cg04973493_VIPR2	285
cg18253473_cg18253473_NA	285
cg09427605_ZNF827	285
cg19268976_LTBP4	285
cg13609319_KNDC1	285
cg06103218_NAT8L,POLN	284
cg20503329_COL15A1	284
cg24363374_ALG3,ECE2,VWA5B2,EIF2B5	284
cg09024228_cg09024228_NA	284
cg17514088_DNAH17	284
cg14206516_TNN	284
cg18852574_RBMS1	284
cg21464220_HDLBP	284
[truncated: 14,865 more rows]

## Sheet: LF2_node_degree
feature	degree
ENSG00000175395_ZNF25	4919
ENSG00000141425_RPRD1A	4706
ENSG00000104164_BLOC1S6	4561
ENSG00000055917_PUM2	4539
ENSG00000164754_RAD21	4534
ENSG00000167005_NUDT21	4379
ENSG00000111615_KRR1	4331
ENSG00000121579_NAA50	4312
ENSG00000140299_BNIP2	4311
ENSG00000110429_FBXO3	4299
ENSG00000005812_FBXL3	4294
ENSG00000115295_CLIP4	4292
ENSG00000139372_TDG	4274
ENSG00000064313_TAF2	4268
ENSG00000164830_OXR1	4181
ENSG00000143401_ANP32E	4158
ENSG00000138660_AP1AR	4120
ENSG00000106723_SPIN1	4117
ENSG00000133731_IMPA1	4116
ENSG00000102471_NDFIP2	4113
ENSG00000164985_PSIP1	4112
ENSG00000138600_SPPL2A	4102
ENSG00000170677_SOCS6	4097
ENSG00000134371_CDC73	4070
ENSG00000127995_CASD1	4045
ENSG00000167193_CRK	4018
ENSG00000100614_PPM1A	4016
ENSG00000138398_PPIG	4000
ENSG00000137710_RDX	4000
ENSG00000117155_SSX2IP	3993
ENSG00000015171_ZMYND11	3975
ENSG00000172466_ZNF24	3947
ENSG00000138018_SELENOI	3947
ENSG00000152484_USP12	3937
ENSG00000116918_TSNAX	3931
ENSG00000163320_CGGBP1	3931
ENSG00000275052_PPP4R3B	3925
ENSG00000163904_SENP2	3923
ENSG00000165832_TRUB1	3922
ENSG00000135241_PNPLA8	3919
ENSG00000196715_VKORC1L1	3916
ENSG00000165156_ZHX1	3905
ENSG00000172007_RAB33B	3889
ENSG00000068366_ACSL4	3874
ENSG00000197782_ZNF780A	3863
ENSG00000118260_CREB1	3861
ENSG00000151292_CSNK1G3	3849
ENSG00000071189_SNX13	3838
ENSG00000179941_BBS10	3837
ENSG00000162928_PEX13	3833
ENSG00000136636_KCTD3	3832
ENSG00000154727_GABPA	3782
ENSG00000122482_ZNF644	3780
ENSG00000106392_C1GALT1	3762
ENSG00000120688_WBP4	3747
ENSG00000139496_NUP58	3733
ENSG00000085719_CPNE3	3724
ENSG00000198363_ASPH	3712
ENSG00000170759_KIF5B	3698
ENSG00000095574_IKZF5	3669
ENSG00000162607_USP1	3662
ENSG00000113851_CRBN	3655
ENSG00000181704_YIPF6	3652
ENSG00000173852_DPY19L1	3644
ENSG00000165813_CCDC186	3633
ENSG00000111897_SERINC1	3625
ENSG00000122068_FYTTD1	3623
ENSG00000153944_MSI2	3622
ENSG00000096717_SIRT1	3619
ENSG00000032742_IFT88	3612
ENSG00000092439_TRPM7	3612
ENSG00000136536_MARCH7	3610
ENSG00000056097_ZFR	3605
ENSG00000139154_AEBP2	3575
ENSG00000113595_TRIM23	3572
ENSG00000129292_PHF20L1	3568
ENSG00000180628_PCGF5	3568
ENSG00000138138_ATAD1	3568
ENSG00000036054_TBC1D23	3565
ENSG00000174695_TMEM167A	3556
ENSG00000166266_CUL5	3543
ENSG00000126945_HNRNPH2	3538
ENSG00000163069_SGCB	3536
ENSG00000198961_PJA2	3536
ENSG00000102401_ARMCX3	3530
ENSG00000083937_CHMP2B	3529
ENSG00000070367_EXOC5	3528
ENSG00000066422_ZBTB11	3526
ENSG00000061676_NCKAP1	3524
ENSG00000111358_GTF2H3	3524
ENSG00000136152_COG3	3513
ENSG00000152078_TMEM56	3492
ENSG00000135315_CEP162	3491
ENSG00000156531_PHF6	3491
ENSG00000189266_PNRC2	3483
ENSG00000177565_TBL1XR1	3478
ENSG00000174405_LIG4	3460
ENSG00000032219_ARID4A	3456
ENSG00000102081_FMR1	3456
ENSG00000147679_UTP23	3440
ENSG00000196199_MPHOSPH8	3427
ENSG00000155545_MIER3	3409
ENSG00000054267_ARID4B	3396
ENSG00000075303_SLC25A40	3392
ENSG00000106701_FSD1L	3391
ENSG00000122958_VPS26A	3383
ENSG00000147650_LRP12	3378
ENSG00000123983_ACSL3	3368
ENSG00000171469_ZNF561	3366
ENSG00000168116_KIAA1586	3353
ENSG00000196437_ZNF569	3343
ENSG00000077097_TOP2B	3343
ENSG00000196504_PRPF40A	3337
ENSG00000138593_SECISBP2L	3316
ENSG00000162664_ZNF326	3316
ENSG00000173041_ZNF680	3315
ENSG00000173674_EIF1AX	3314
ENSG00000168615_ADAM9	3312
ENSG00000163281_GNPDA2	3310
ENSG00000023287_RB1CC1	3309
ENSG00000112531_QKI	3297
ENSG00000105849_TWISTNB	3287
ENSG00000081019_RSBN1	3275
ENSG00000014123_UFL1	3275
ENSG00000115145_STAM2	3266
ENSG00000104442_ARMC1	3265
ENSG00000047932_GOPC	3265
ENSG00000135316_SYNCRIP	3260
ENSG00000155100_OTUD6B	3258
ENSG00000108064_TFAM	3250
ENSG00000079950_STX7	3247
ENSG00000072415_MPP5	3246
ENSG00000104177_MYEF2	3240
ENSG00000029363_BCLAF1	3238
ENSG00000107560_RAB11FIP2	3238
ENSG00000180917_CMTR2	3237
ENSG00000104388_RAB2A	3237
ENSG00000134987_WDR36	3222
ENSG00000145833_DDX46	3217
ENSG00000069275_NUCKS1	3213
ENSG00000197619_ZNF615	3211
ENSG00000281649_EBLN3P	3208
ENSG00000130024_PHF10	3208
ENSG00000112697_TMEM30A	3206
ENSG00000169359_SLC33A1	3200
ENSG00000163848_ZNF148	3194
ENSG00000120686_UFM1	3192
ENSG00000078747_ITCH	3170
ENSG00000196850_PPTC7	3163
ENSG00000146476_ARMT1	3153
ENSG00000008294_SPAG9	3151
ENSG00000128915_ICE2	3147
ENSG00000115808_STRN	3136
ENSG00000178691_SUZ12	3129
ENSG00000198707_CEP290	3129
ENSG00000080371_RAB21	3115
ENSG00000164023_SGMS2	3114
ENSG00000141646_SMAD4	3114
ENSG00000165417_GTF2A1	3113
ENSG00000136100_VPS36	3111
ENSG00000109618_SEPSECS	3103
ENSG00000153147_SMARCA5	3098
ENSG00000113810_SMC4	3094
ENSG00000139826_ABHD13	3093
ENSG00000211456_SACM1L	3088
ENSG00000039123_SKIV2L2	3087
ENSG00000256087_ZNF432	3086
ENSG00000116747_TROVE2	3085
ENSG00000082175_PGR	3082
ENSG00000001631_KRIT1	3071
ENSG00000149313_AASDHPPT	3063
ENSG00000228223_HCG11	3063
ENSG00000139697_SBNO1	3055
ENSG00000155970_MICU3	3054
ENSG00000145349_CAMK2D	3050
ENSG00000148700_ADD3	3048
ENSG00000137776_SLTM	3048
ENSG00000136451_VEZF1	3047
ENSG00000198380_GFPT1	3046
ENSG00000144747_TMF1	3044
ENSG00000189180_ZNF33A	3041
ENSG00000157500_APPL1	3034
ENSG00000164331_ANKRA2	3020
ENSG00000163322_ABRAXAS1	3018
ENSG00000163110_PDLIM5	3008
ENSG00000116750_UCHL5	3008
ENSG00000077147_TM9SF3	3007
ENSG00000103540_CCP110	3005
ENSG00000197928_ZNF677	3002
ENSG00000134186_PRPF38B	3001
ENSG00000138448_ITGAV	2996
ENSG00000005700_IBTK	2984
ENSG00000135968_GCC2	2981
ENSG00000158092_NCK1	2978
ENSG00000169519_METTL15	2970
ENSG00000138078_PREPL	2969
ENSG00000248092_NNT-AS1	2968
ENSG00000110066_KMT5B	2968
ENSG00000134755_DSC2	2967
ENSG00000198015_MRPL42	2966
ENSG00000078674_PCM1	2956
ENSG00000166037_CEP57	2954
ENSG00000113658_SMAD5	2953
ENSG00000162409_PRKAA2	2948
ENSG00000111790_FGFR1OP2	2947
ENSG00000142875_PRKACB	2946
ENSG00000117533_VAMP4	2942
ENSG00000169762_TAPT1	2940
ENSG00000077254_USP33	2928
ENSG00000110172_CHORDC1	2926
ENSG00000058063_ATP11B	2919
ENSG00000182827_ACBD3	2917
ENSG00000179387_ELMOD2	2916
ENSG00000065243_PKN2	2914
ENSG00000100664_EIF5	2906
ENSG00000111711_GOLT1B	2904
ENSG00000078124_ACER3	2900
ENSG00000163527_STT3B	2899
ENSG00000150093_ITGB1	2867
ENSG00000136381_IREB2	2863
ENSG00000234545_FAM133B	2860
ENSG00000007168_PAFAH1B1	2849
ENSG00000185728_YTHDF3	2846
ENSG00000196323_ZBTB44	2841
ENSG00000132356_PRKAA1	2839
ENSG00000166855_CLPX	2833
ENSG00000075790_BCAP29	2833
ENSG00000179454_KLHL28	2824
ENSG00000147649_MTDH	2822
ENSG00000113391_FAM172A	2820
ENSG00000137040_RANBP6	2817
ENSG00000240225_ZNF542P	2815
ENSG00000034677_RNF19A	2813
ENSG00000165525_NEMF	2804
ENSG00000109670_FBXW7	2800
ENSG00000217128_FNIP1	2800
ENSG00000091436_MAP3K20	2795
ENSG00000126858_RHOT1	2792
ENSG00000159256_MORC3	2788
ENSG00000135974_C2orf49	2776
ENSG00000143756_FBXO28	2769
ENSG00000113580_NR3C1	2767
ENSG00000146802_TMEM168	2757
ENSG00000197601_FAR1	2752
ENSG00000165934_CPSF2	2745
ENSG00000177888_ZBTB41	2738
ENSG00000186106_ANKRD46	2734
ENSG00000166503_HDGFL3	2733
ENSG00000113638_TTC33	2713
ENSG00000151116_UEVLD	2710
ENSG00000078142_PIK3C3	2707
ENSG00000083520_DIS3	2705
ENSG00000115524_SF3B1	2701
ENSG00000143751_SDE2	2688
ENSG00000174106_LEMD3	2688
ENSG00000087470_DNM1L	2677
ENSG00000169504_CLIC4	2676
ENSG00000186908_ZDHHC17	2673
ENSG00000163558_PRKCI	2666
ENSG00000102189_EEA1	2665
ENSG00000169045_HNRNPH1	2665
ENSG00000154114_TBCEL	2660
ENSG00000085365_SCAMP1	2658
ENSG00000173275_ZNF449	2657
ENSG00000119707_RBM25	2657
ENSG00000110075_PPP6R3	2656
ENSG00000052126_PLEKHA5	2655
ENSG00000081014_AP4E1	2652
ENSG00000065613_SLK	2649
ENSG00000139291_TMEM19	2643
ENSG00000143155_TIPRL	2634
ENSG00000115084_SLC35F5	2625
ENSG00000121931_LRIF1	2622
ENSG00000088179_PTPN4	2620
ENSG00000112851_ERBIN	2615
ENSG00000144224_UBXN4	2613
ENSG00000182150_ERCC6L2	2609
ENSG00000074603_DPP8	2601
ENSG00000147874_HAUS6	2601
ENSG00000120992_LYPLA1	2597
ENSG00000196792_STRN3	2596
ENSG00000166170_BAG5	2586
ENSG00000084733_RAB10	2585
ENSG00000011566_MAP4K3	2580
ENSG00000085721_RRN3	2578
ENSG00000164125_FAM198B	2578
ENSG00000205208_C4orf46	2574
ENSG00000153006_SREK1IP1	2570
ENSG00000120253_NUP43	2568
ENSG00000164953_TMEM67	2564
ENSG00000060339_CCAR1	2563
ENSG00000112874_NUDT12	2563
ENSG00000006576_PHTF2	2559
ENSG00000104643_MTMR9	2556
ENSG00000178567_EPM2AIP1	2555
ENSG00000163743_RCHY1	2551
ENSG00000183814_LIN9	2547
ENSG00000107581_EIF3A	2546
ENSG00000047315_POLR2B	2542
ENSG00000198677_TTC37	2533
ENSG00000115966_ATF2	2533
ENSG00000135535_CD164	2529
ENSG00000187187_ZNF546	2528
ENSG00000197044_ZNF441	2525
ENSG00000170871_KIAA0232	2523
ENSG00000102158_MAGT1	2515
ENSG00000137992_DBT	2513
ENSG00000154639_CXADR	2511
ENSG00000012174_MBTPS2	2511
ENSG00000106025_TSPAN12	2509
ENSG00000089335_ZNF302	2501
ENSG00000134318_ROCK2	2499
ENSG00000197323_TRIM33	2497
ENSG00000114796_KLHL24	2491
ENSG00000148481_MINDY3	2487
ENSG00000110330_BIRC2	2485
ENSG00000118407_FILIP1	2485
ENSG00000225733_FGD5-AS1	2482
ENSG00000122008_POLK	2473
ENSG00000112739_PRPF4B	2470
ENSG00000162378_ZYG11B	2468
ENSG00000168813_ZNF507	2468
ENSG00000132436_FIGNL1	2464
ENSG00000115365_LANCL1	2453
ENSG00000204899_MZT1	2449
ENSG00000083896_YTHDC1	2440
ENSG00000118412_CASP8AP2	2435
ENSG00000107771_CCSER2	2426
ENSG00000135720_DYNC1LI2	2425
ENSG00000169379_ARL13B	2424
ENSG00000174749_C4orf32	2424
ENSG00000156671_SAMD8	2421
ENSG00000147894_C9orf72	2420
ENSG00000135341_MAP3K7	2418
ENSG00000164327_RICTOR	2417
ENSG00000213463_SYNJ2BP	2409
ENSG00000132912_DCTN4	2408
ENSG00000001084_GCLC	2408
ENSG00000185658_BRWD1	2400
ENSG00000244754_N4BP2L2	2400
ENSG00000148943_LIN7C	2399
ENSG00000005469_CROT	2397
ENSG00000139687_RB1	2392
ENSG00000146463_ZMYM4	2390
ENSG00000112701_SENP6	2382
ENSG00000165322_ARHGAP12	2380
ENSG00000152242_C18orf25	2376
ENSG00000070018_LRP6	2376
ENSG00000196865_NHLRC2	2375
ENSG00000110422_HIPK3	2373
ENSG00000153956_CACNA2D1	2364
ENSG00000107679_PLEKHA1	2360
ENSG00000188994_ZNF292	2357
ENSG00000086712_TXLNG	2356
ENSG00000163428_LRRC58	2354
ENSG00000117500_TMED5	2352
ENSG00000138709_LARP1B	2342
ENSG00000122299_ZC3H7A	2341
ENSG00000163714_U2SURP	2338
ENSG00000164219_PGGT1B	2330
ENSG00000125676_THOC2	2323
ENSG00000068305_MEF2A	2323
ENSG00000145715_RASA1	2322
ENSG00000132952_USPL1	2322
ENSG00000121486_TRMT1L	2311
ENSG00000109458_GAB1	2302
ENSG00000204186_ZDBF2	2299
ENSG00000112208_BAG2	2292
ENSG00000164031_DNAJB14	2291
ENSG00000177034_MTX3	2279
ENSG00000157181_C1orf27	2273
ENSG00000123575_FAM199X	2273
ENSG00000134852_CLOCK	2271
ENSG00000134352_IL6ST	2268
ENSG00000054523_KIF1B	2266
ENSG00000031003_FAM13B	2265
ENSG00000101752_MIB1	2259
ENSG00000108506_INTS2	2259
ENSG00000120784_ZFP30	2258
ENSG00000139218_SCAF11	2250
ENSG00000109606_DHX15	2246
ENSG00000078114_NEBL	2246
ENSG00000081307_UBA5	2241
ENSG00000148516_ZEB1	2234
ENSG00000118873_RAB3GAP2	2233
ENSG00000039319_ZFYVE16	2230
ENSG00000104497_SNX16	2230
ENSG00000066557_LRRC40	2230
ENSG00000114062_UBE3A	2230
ENSG00000153339_TRAPPC8	2226
ENSG00000136051_WASHC4	2219
ENSG00000157540_DYRK1A	2218
ENSG00000018510_AGPS	2214
ENSG00000152332_UHMK1	2210
ENSG00000198919_DZIP3	2209
ENSG00000084093_REST	2208
ENSG00000213516_RBMXL1	2208
ENSG00000109819_PPARGC1A	2207
ENSG00000152620_NADK2	2205
ENSG00000120137_PANK3	2205
ENSG00000144744_UBA3	2202
ENSG00000100815_TRIP11	2201
ENSG00000174032_SLC25A30	2199
ENSG00000058804_NDC1	2199
ENSG00000181904_C5orf24	2192
ENSG00000156011_PSD3	2191
ENSG00000085224_ATRX	2189
ENSG00000080345_RIF1	2188
ENSG00000198408_MGEA5	2188
ENSG00000132640_BTBD3	2182
ENSG00000162927_PUS10	2168
ENSG00000017260_ATP2C1	2167
ENSG00000171714_ANO5	2167
ENSG00000198046_ZNF667	2166
ENSG00000085788_DDHD2	2162
ENSG00000090060_PAPOLA	2161
ENSG00000147027_TMEM47	2160
ENSG00000124743_KLHL31	2158
ENSG00000107186_MPDZ	2157
ENSG00000157107_FCHO2	2153
ENSG00000161813_LARP4	2150
ENSG00000172572_PDE3A	2145
ENSG00000100852_ARHGAP5	2144
ENSG00000129315_CCNT1	2143
ENSG00000137145_DENND4C	2141
ENSG00000101745_ANKRD12	2140
ENSG00000173875_ZNF791	2134
ENSG00000164114_MAP9	2132
ENSG00000121741_ZMYM2	2128
ENSG00000198718_TOGARAM1	2122
ENSG00000136021_SCYL2	2120
ENSG00000067248_DHX29	2119
ENSG00000247556_OIP5-AS1	2113
ENSG00000253797_UTP14C	2110
ENSG00000102580_DNAJC3	2110
ENSG00000118496_FBXO30	2106
ENSG00000176853_FAM91A1	2105
ENSG00000198162_MAN1A2	2102
ENSG00000118007_STAG1	2099
ENSG00000139116_KIF21A	2097
ENSG00000153201_RANBP2	2095
ENSG00000143889_HNRNPLL	2079
ENSG00000236287_ZBED5	2078
ENSG00000135218_CD36	2074
ENSG00000168827_GFM1	2068
ENSG00000119820_YIPF4	2068
ENSG00000113240_CLK4	2060
ENSG00000119912_IDE	2056
ENSG00000075292_ZNF638	2056
ENSG00000138095_LRPPRC	2055
ENSG00000156162_DPY19L4	2046
ENSG00000214960_ISPD	2040
ENSG00000152409_JMY	2023
ENSG00000048028_USP28	2011
ENSG00000198862_LTN1	2011
ENSG00000188647_PTAR1	2011
ENSG00000112183_RBM24	2009
ENSG00000213160_KLHL23	2009
ENSG00000148153_INIP	2002
ENSG00000170802_FOXN2	2000
ENSG00000169760_NLGN1	1996
ENSG00000170248_PDCD6IP	1994
ENSG00000068885_IFT80	1992
ENSG00000197776_KLHDC1	1985
ENSG00000123552_USP45	1983
ENSG00000213047_DENND1B	1980
ENSG00000146281_PM20D2	1978
ENSG00000134444_KIAA1468	1971
ENSG00000132953_XPO4	1965
ENSG00000172915_NBEA	1957
ENSG00000254004_ZNF260	1956
ENSG00000177932_ZNF354C	1950
ENSG00000035928_RFC1	1948
ENSG00000112200_ZNF451	1943
ENSG00000086619_ERO1B	1940
ENSG00000164164_OTUD4	1938
ENSG00000161048_NAPEPLD	1935
ENSG00000145907_G3BP1	1933
ENSG00000163539_CLASP2	1933
ENSG00000198105_ZNF248	1927
ENSG00000155008_APOOL	1927
ENSG00000156869_FRRS1	1925
ENSG00000101966_XIAP	1920
ENSG00000023228_NDUFS1	1919
ENSG00000136153_LMO7	1911
ENSG00000180530_NRIP1	1909
ENSG00000158691_ZSCAN12	1895
ENSG00000104331_IMPAD1	1893
ENSG00000177119_ANO6	1893
ENSG00000012048_BRCA1	1893
ENSG00000071794_HLTF	1886
ENSG00000185477_GPRIN3	1880
ENSG00000138443_ABI2	1873
ENSG00000066926_FECH	1868
ENSG00000092148_HECTD1	1863
ENSG00000062725_APPBP2	1862
ENSG00000122550_KLHL7	1858
ENSG00000124198_ARFGEF2	1850
ENSG00000136874_STX17	1848
ENSG00000151233_GXYLT1	1847
ENSG00000118596_SLC16A7	1847
ENSG00000090686_USP48	1846
ENSG00000158711_ELK4	1839
ENSG00000160551_TAOK1	1835
ENSG00000164930_FZD6	1834
ENSG00000105983_LMBR1	1832
ENSG00000144445_KANSL1L	1824
ENSG00000145780_FEM1C	1821
ENSG00000120696_KBTBD7	1821
ENSG00000163257_DCAF16	1818
ENSG00000112282_MED23	1813
ENSG00000163939_PBRM1	1813
ENSG00000113441_LNPEP	1810
ENSG00000165476_REEP3	1808
ENSG00000182359_KBTBD3	1807
ENSG00000144824_PHLDB2	1805
ENSG00000099204_ABLIM1	1803
ENSG00000129116_PALLD	1799
ENSG00000145431_PDGFC	1798
ENSG00000185716_C16orf52	1797
ENSG00000174010_KLHL15	1796
ENSG00000138035_PNPT1	1793
ENSG00000158301_GPRASP2	1788
ENSG00000173542_MOB1B	1781
ENSG00000197429_IPP	1780
ENSG00000100644_HIF1A	1775
ENSG00000100934_SEC23A	1775
ENSG00000146085_MUT	1772
ENSG00000011405_PIK3C2A	1767
ENSG00000131263_RLIM	1754
ENSG00000122970_IFT81	1752
ENSG00000151718_WWC2	1750
ENSG00000117707_PROX1	1750
ENSG00000077684_JADE1	1745
ENSG00000107290_SETX	1743
ENSG00000196914_ARHGEF12	1743
ENSG00000187790_FANCM	1731
ENSG00000131375_CAPN7	1729
ENSG00000145012_LPP	1722
ENSG00000136450_SRSF1	1720
ENSG00000085491_SLC25A24	1719
ENSG00000047410_TPR	1714
ENSG00000197808_ZNF461	1712
ENSG00000198924_DCLRE1A	1710
ENSG00000123200_ZC3H13	1710
ENSG00000110693_SOX6	1710
ENSG00000153914_SREK1	1707
ENSG00000162702_ZNF281	1703
ENSG00000080493_SLC4A4	1696
ENSG00000116984_MTR	1695
ENSG00000182903_ZNF721	1686
ENSG00000069248_NUP133	1683
ENSG00000147124_ZNF41	1677
ENSG00000164292_RHOBTB3	1676
ENSG00000001629_ANKIB1	1668
ENSG00000171295_ZNF440	1663
ENSG00000198040_ZNF84	1660
ENSG00000159921_GNE	1654
ENSG00000163827_LRRC2	1652
ENSG00000133104_SPART	1646
ENSG00000153922_CHD1	1646
ENSG00000164118_CEP44	1644
ENSG00000072364_AFF4	1642
ENSG00000198932_GPRASP1	1638
ENSG00000138434_SSFA2	1628
ENSG00000198894_CIPC	1627
ENSG00000091009_RBM27	1626
ENSG00000197937_ZNF347	1626
ENSG00000113742_CPEB4	1621
ENSG00000108256_NUFIP2	1618
ENSG00000073910_FRY	1615
ENSG00000104218_CSPP1	1610
ENSG00000145725_PPIP5K2	1604
ENSG00000144357_UBR3	1602
ENSG00000102531_FNDC3A	1599
ENSG00000129493_HEATR5A	1598
ENSG00000139746_RBM26	1597
ENSG00000138641_HERC3	1595
ENSG00000163738_MTHFD2L	1594
ENSG00000095787_WAC	1590
ENSG00000198642_KLHL9	1588
ENSG00000100320_RBFOX2	1588
ENSG00000188283_ZNF383	1585
ENSG00000106692_FKTN	1584
ENSG00000196466_ZNF799	1579
ENSG00000138081_FBXO11	1579
ENSG00000174842_GLMN	1579
ENSG00000140153_WDR20	1575
ENSG00000171100_MTM1	1569
ENSG00000056586_RC3H2	1567
ENSG00000165028_NIPSNAP3B	1566
ENSG00000180488_MIGA1	1561
ENSG00000047188_YTHDC2	1557
ENSG00000013441_CLK1	1557
ENSG00000188419_CHM	1555
ENSG00000177311_ZBTB38	1550
ENSG00000120217_CD274	1536
ENSG00000198399_ITSN2	1535
ENSG00000066777_ARFGEF1	1530
ENSG00000170456_DENND5B	1529
ENSG00000078043_PIAS2	1516
ENSG00000025156_HSF2	1508
ENSG00000198087_CD2AP	1506
ENSG00000053900_ANAPC4	1499
ENSG00000059758_CDK17	1497
ENSG00000196458_ZNF605	1496
ENSG00000175595_ERCC4	1493
ENSG00000162402_USP24	1486
ENSG00000136144_RCBTB1	1485
ENSG00000158528_PPP1R9A	1484
ENSG00000111727_HCFC2	1482
ENSG00000126775_ATG14	1478
ENSG00000081377_CDC14B	1475
ENSG00000152102_FAM168B	1473
ENSG00000163635_ATXN7	1472
ENSG00000102910_LONP2	1465
ENSG00000198626_RYR2	1461
ENSG00000023516_AKAP11	1458
ENSG00000131051_RBM39	1456
ENSG00000048649_RSF1	1455
ENSG00000123636_BAZ2B	1451
ENSG00000126070_AGO3	1448
ENSG00000040275_SPDL1	1447
ENSG00000237125_HAND2-AS1	1442
ENSG00000128881_TTBK2	1440
ENSG00000134900_TPP2	1438
ENSG00000152661_GJA1	1437
ENSG00000164187_LMBRD2	1435
ENSG00000180008_SOCS4	1432
ENSG00000151553_FAM160B1	1430
ENSG00000183230_CTNNA3	1417
ENSG00000123700_KCNJ2	1414
ENSG00000136111_TBC1D4	1411
ENSG00000166233_ARIH1	1408
ENSG00000214367_HAUS3	1407
ENSG00000154678_PDE1C	1405
ENSG00000119638_NEK9	1404
ENSG00000164828_SUN1	1402
ENSG00000069667_RORA	1394
ENSG00000097096_SYDE2	1391
ENSG00000126773_PCNX4	1390
ENSG00000257647_AC124312.2	1387
ENSG00000132485_ZRANB2	1386
ENSG00000117625_RCOR3	1383
ENSG00000136044_APPL2	1382
ENSG00000134759_ELP2	1381
ENSG00000175548_ALG10B	1379
ENSG00000109381_ELF2	1374
ENSG00000077458_FAM76B	1372
ENSG00000128585_MKLN1	1371
ENSG00000146247_PHIP	1351
ENSG00000175893_ZDHHC21	1347
ENSG00000115942_ORC2	1347
ENSG00000178177_LCORL	1342
ENSG00000162923_WDR26	1338
ENSG00000173482_PTPRM	1337
ENSG00000076685_NT5C2	1336
ENSG00000073712_FERMT2	1333
ENSG00000165650_PDZD8	1332
ENSG00000030419_IKZF2	1328
ENSG00000187079_TEAD1	1320
ENSG00000116406_EDEM3	1312
ENSG00000166432_ZMAT1	1312
ENSG00000162971_TYW5	1309
ENSG00000072501_SMC1A	1306
ENSG00000196705_ZNF431	1303
ENSG00000172292_CERS6	1302
ENSG00000033800_PIAS1	1298
ENSG00000074054_CLASP1	1298
ENSG00000203668_CHML	1296
ENSG00000132780_NASP	1295
ENSG00000203867_RBM20	1290
ENSG00000047346_FAM214A	1284
ENSG00000114120_SLC25A36	1272
ENSG00000127947_PTPN12	1269
ENSG00000250305_KIAA1456	1265
ENSG00000164190_NIPBL	1264
ENSG00000123570_RAB9B	1262
ENSG00000188785_ZNF548	1262
ENSG00000115977_AAK1	1261
ENSG00000136937_NCBP1	1254
ENSG00000156504_FAM122B	1253
ENSG00000153187_HNRNPU	1252
ENSG00000145734_BDP1	1246
ENSG00000154305_MIA3	1238
ENSG00000145495_MARCH6	1232
ENSG00000089818_NECAP1	1222
ENSG00000182985_CADM1	1218
ENSG00000128607_KLHDC10	1218
ENSG00000148634_HERC4	1207
ENSG00000164124_TMEM144	1205
ENSG00000048740_CELF2	1194
ENSG00000164169_PRMT9	1175
ENSG00000171103_TRMT61B	1173
ENSG00000147854_UHRF2	1168
ENSG00000272341_AL137003.2	1166
ENSG00000075539_FRYL	1163
ENSG00000157625_TAB3	1159
ENSG00000127980_PEX1	1158
ENSG00000186300_ZNF555	1157
ENSG00000134644_PUM1	1146
ENSG00000116641_DOCK7	1144
ENSG00000251192_ZNF674	1141
ENSG00000174013_FBXO45	1139
ENSG00000062370_ZNF112	1139
ENSG00000118922_KLF12	1136
ENSG00000125484_GTF3C4	1135
ENSG00000143702_CEP170	1131
ENSG00000119402_FBXW2	1131
ENSG00000206560_ANKRD28	1131
ENSG00000111605_CPSF6	1127
ENSG00000006459_KDM7A	1109
ENSG00000205268_PDE7A	1109
ENSG00000170500_LONRF2	1102
ENSG00000110841_PPFIBP1	1101
ENSG00000092531_SNAP23	1094
ENSG00000152795_HNRNPDL	1088
ENSG00000138376_BARD1	1087
ENSG00000114933_INO80D	1087
ENSG00000085274_MYNN	1085
ENSG00000137878_GCOM1	1083
ENSG00000102893_PHKB	1083
ENSG00000178966_RMI1	1081
ENSG00000183309_ZNF623	1080
ENSG00000005471_ABCB4	1074
ENSG00000011114_BTBD7	1074
ENSG00000120008_WDR11	1073
ENSG00000115355_CCDC88A	1072
ENSG00000206127_GOLGA8O	1071
ENSG00000239305_RNF103	1069
ENSG00000107242_PIP5K1B	1060
ENSG00000115020_PIKFYVE	1056
ENSG00000139842_CUL4A	1053
ENSG00000134744_ZCCHC11	1046
ENSG00000151422_FER	1045
ENSG00000164975_SNAPC3	1042
ENSG00000080546_SESN1	1037
ENSG00000244462_RBM12	1036
ENSG00000100941_PNN	1028
ENSG00000146676_PURB	1017
ENSG00000066739_ATG2B	1010
ENSG00000168172_HOOK3	1006
ENSG00000136731_UGGT1	1000
ENSG00000069869_NEDD4	1000
ENSG00000108510_MED13	999
ENSG00000163491_NEK10	995
ENSG00000114127_XRN1	994
ENSG00000093167_LRRFIP2	993
ENSG00000082701_GSK3B	989
ENSG00000075407_ZNF37A	988
ENSG00000135040_NAA35	985
ENSG00000253106_AC090198.1	981
ENSG00000198815_FOXJ3	976
ENSG00000198521_ZNF43	969
ENSG00000176055_MBLAC2	969
ENSG00000164073_MFSD8	968
ENSG00000198146_ZNF770	964
ENSG00000068650_ATP11A	964
ENSG00000033030_ZCCHC8	958
ENSG00000177189_RPS6KA3	957
ENSG00000100731_PCNX1	957
ENSG00000164074_ABHD18	956
ENSG00000089916_GPATCH2L	951
ENSG00000037749_MFAP3	950
ENSG00000146909_NOM1	946
ENSG00000224078_SNHG14	943
ENSG00000197969_VPS13A	941
ENSG00000172766_NAA16	940
ENSG00000119684_MLH3	933
ENSG00000127914_AKAP9	930
ENSG00000198554_WDHD1	928
ENSG00000115548_KDM3A	924
ENSG00000260884_AC009120.4	924
ENSG00000135541_AHI1	922
ENSG00000260918_AC107398.3	915
ENSG00000107938_EDRF1	914
ENSG00000162437_RAVER2	911
ENSG00000173230_GOLGB1	908
ENSG00000185129_PURA	908
ENSG00000060749_QSER1	904
ENSG00000115464_USP34	902
ENSG00000172869_DMXL1	900
ENSG00000127334_DYRK2	899
ENSG00000137872_SEMA6D	895
cg05361594_cg05361594_NA	894
cg04348683_C16orf52,VWA3A	892
ENSG00000257151_PWAR6	885
ENSG00000156931_VPS8	883
ENSG00000111731_C2CD5	872
ENSG00000164506_STXBP5	872
ENSG00000147050_KDM6A	870
cg12200188_DOCK4	869
ENSG00000188177_ZC3H6	859
cg00910924_PDE10A	853
ENSG00000147548_NSD3	852
ENSG00000197857_ZNF44	843
cg10009514_PTPN14	842
cg06844984_RBFOX1	840
ENSG00000116704_SLC35D1	839
cg12225685_FRAS1,ANXA3	835
ENSG00000183808_RBM12B	833
cg02169859_CCDC180	831
cg24127513_NCK1,IL20RB	830
cg13502716_WDR82,PPM1M,TWF2,TLR9	828
cg16936561_RAB11FIP5	825
ENSG00000051825_MPHOSPH9	823
cg02668261_ERICH1	821
cg27309631_cg27309631_NA	821
ENSG00000078177_N4BP2	819
cg08043872_DOCK4	814
ENSG00000173681_BCLAF3	814
ENSG00000271092_TMEM56-RWDD3	811
cg25718026_cg25718026_NA	809
cg10580715_FAM168A	809
ENSG00000106086_PLEKHA8	807
cg19951409_ZNF516	806
ENSG00000104517_UBR5	804
cg26350977_WARS2	802
cg11811869_KATNBL1	802
ENSG00000115904_SOS1	802
cg13940029_ASPN,CENPP	801
cg04196808_TTC27	799
cg26695444_LINC00839	796
cg07645286_RAPGEF4	795
cg16430963_WWTR1,WWTR1-AS1	795
cg05445090_LATS2	795
ENSG00000177054_ZDHHC13	795
cg13112511_PDE4D	793
cg01963464_AGFG1	790
cg13277963_FOXN3	787
cg06539411_TMEM135	787
cg11189177_ABR	787
cg14250336_DAPK1	786
cg02466016_SGCD	786
cg16507631_ARHGEF10	785
ENSG00000131127_ZNF141	784
cg02966200_SERPINE2	783
cg04301760_TSC2,NTHL1	782
ENSG00000122435_TRMT13	782
cg14887955_TDGF1	780
ENSG00000117479_SLC19A2	780
cg16088427_WDR25	778
cg10238092_cg10238092_NA	777
ENSG00000107951_MTPAP	773
ENSG00000186812_ZNF397	771
cg14317321_HLA-F,HLA-F-AS1	769
cg05492113_TUB	768
cg08409956_GOLGA3,RPS11P5,CHFR	768
cg03767300_cg03767300_NA	766
cg16018002_NEDD9	766
cg14261271_FMNL2	763
cg00886909_CFI	762
cg06317805_LINC00882	762
cg24268966_HMGA2	760
cg14268120_GSG2,ITGAE	760
ENSG00000103852_TTC23	758
cg06456255_MAML3	757
cg06722917_cg06722917_NA	756
ENSG00000197312_DDI2	756
ENSG00000061918_GUCY1B3	754
cg26746255_cg26746255_NA	753
ENSG00000183723_CMTM4	753
cg02723458_cg02723458_NA	751
ENSG00000038219_BOD1L1	751
cg00238362_cg00238362_NA	749
cg22154859_PFDN4	749
ENSG00000106261_ZKSCAN1	748
cg23456689_BEND7	747
cg01716465_cg01716465_NA	747
cg05824768_MYO7B	745
cg26536999_cg26536999_NA	745
cg16255585_CASP9,DNAJC16	744
cg01432329_cg01432329_NA	744
cg10673246_BTBD11	743
cg12658925_GFI1B	742
cg24315840_SLK,COL17A1	740
ENSG00000279519_AC007382.1	740
cg09191594_TDRD9	739
ENSG00000148935_GAS2	739
cg14269191_HBG2	738
cg14138171_CIR1,SCRN3	737
cg25174455_ABCA5	736
ENSG00000154265_ABCA5	736
cg01405685_NPR3	734
cg05421097_cg05421097_NA	734
cg14592638_cg14592638_NA	733
cg06746017_EML1	732
cg25367558_USP49	731
cg01958481_cg01958481_NA	730
cg05703659_NCAPG2	729
cg02747390_SRPK2	729
cg25882591_VPS53	727
cg14232091_VPS52,RPS18	726
cg16618977_ST3GAL6,ST3GAL6-AS1	726
cg16570129_RUFY1	726
cg25253207_cg25253207_NA	725
cg16402635_CASP1,CARD16	725
cg14222679_CYP4B1	724
cg17278960_FGGY	724
cg03180953_IGFALS,SPSB3,HAGH,NUBP2	724
cg08977887_MATN2	722
cg05078644_NALCN	722
cg14646452_FBXW4	721
cg13402865_cg13402865_NA	720
cg16967068_cg16967068_NA	720
cg26531545_cg26531545_NA	720
cg02167757_SIAH1,LONP2	719
cg26451499_CEP112	719
cg01891782_KCNMB2	718
cg21524001_cg21524001_NA	718
cg08715720_PPP2R2B	717
cg07303017_RBM26,RBM26-AS1	717
cg22231400_SLC17A7	717
cg18666330_CPSF3,ITGB1BP1	717
cg17878351_CLIC5	717
ENSG00000138688_KIAA1109	717
ENSG00000113649_TCERG1	717
cg05867388_IGFBP3	716
cg04400944_PTCD1,BUD31	715
cg01004457_cg01004457_NA	715
cg23412633_MKRN2OS,TSEN2	715
cg18789472_AEBP2	715
cg02124291_cg02124291_NA	715
cg22054793_SLC26A4,SLC26A4-AS1	714
cg05388765_DDX28,DUS2	714
cg08350797_DUSP7	713
ENSG00000166704_ZNF606	713
cg01088658_ENAM,JCHAIN	713
cg21049825_cg21049825_NA	712
cg05686197_LRP1B	712
cg11902557_CAND1,GGTA2P	711
ENSG00000157764_BRAF	711
cg22236410_RRM1	710
cg16727774_cg16727774_NA	710
cg27397757_GLIS1	710
cg11101316_UBE3D	709
cg14919130_LAMA2,MESTP1	708
cg07491979_EXOC4	707
cg09029046_IRF2	707
cg16189093_MIR100HG	707
cg25892041_cg25892041_NA	707
cg24791846_cg24791846_NA	707
cg19998332_cg19998332_NA	707
cg25002318_TRPV1	707
cg24252766_cg24252766_NA	706
cg07460565_ZNF236	706
ENSG00000158636_EMSY	706
cg00716040_RCAN3	705
cg07827304_SNIP1	705
cg17106572_cg17106572_NA	704
cg18432768_KCNJ16	704
cg12487914_cg12487914_NA	703
cg24153714_C10orf11	702
cg08527313_PTPRU	701
cg25548328_BLVRA	701
cg14596987_PTCH1	701
cg18417201_SUMF1	701
cg07719674_cg07719674_NA	701
cg05235363_cg05235363_NA	700
cg17102627_NFATC1	700
ENSG00000134982_APC	699
cg17046484_B9D1	698
cg04973505_cg04973505_NA	698
cg25710630_KNSTRN	698
cg23988964_ATF3	698
cg18239042_NAA15	697
cg07581492_THRB	697
cg03460315_ELOVL6	697
cg12458039_FAM20C	697
cg22563286_cg22563286_NA	697
cg00933763_JAZF1	696
cg14420715_DOCK10	696
cg07461273_MCM7,TAF6,MIR25,COPS6,AP4M1	696
cg05337229_YBX1	696
cg19760648_EBF3	696
cg05392265_DIRAS3,GNG12-AS1	695
cg19030737_ITPKB	695
cg24060475_WDFY3	695
cg05109966_GMDS,FOXC1	694
cg24652994_CADPS2	694
cg21755790_cg21755790_NA	694
cg08843660_cg08843660_NA	694
ENSG00000178694_NSUN3	694
cg25312054_IRS2	693
cg10706206_cg10706206_NA	693
cg07260333_TCF25,TUBB3,MC1R	693
cg15708219_BMI1	693
cg05197660_DIS3L2	693
cg03833511_UPF2	692
cg02341578_TDRP	692
cg00954161_RN7SL574P,CCDC27,SMIM1,LRRC47	692
cg19819980_ST3GAL3	691
cg03269020_MYO16	691
cg01062838_CARD6,RPL37	691
cg22022321_SCP2	689
cg23001413_cg23001413_NA	689
cg20362266_cg20362266_NA	689
cg21772489_CDC42	688
cg05415980_PLEKHM3	688
cg05434602_MTHFSD	687
cg06095433_cg06095433_NA	687
cg21684318_ATL2	687
cg18372141_cg18372141_NA	686
cg18928866_KLKB1	686
cg25133706_cg25133706_NA	686
cg00301726_cg00301726_NA	686
cg18648570_MCF2L	686
cg27625481_HERC1	684
cg04486528_CNTNAP2	684
cg25465606_HSF2BP,RRP1B	684
cg04094829_CUX1	683
cg23600314_FBXW7	683
cg11230248_cg11230248_NA	682
cg26117389_cg26117389_NA	682
cg17823234_ZNF781,ZNF607,ZFP30	682
cg04837722_IGF2R	681
cg05246098_PDGFD	681
ENSG00000267680_ZNF224	681
cg01167177_cg01167177_NA	680
cg12706662_SLC35B4	680
cg18516268_RPL23	680
ENSG00000116001_TIA1	680
cg06747362_MRPL39,MIR155HG	679
cg22389317_MYT1L	679
cg17042754_PTPRN2	679
cg04460007_DCUN1D4	678
cg01402099_LRRC43	678
cg08784110_cg08784110_NA	677
cg10133953_cg10133953_NA	677
cg05389958_NHLRC4,PIGQ	677
cg03407966_TBC1D9	677
cg00413097_FLVCR1-AS1	677
cg01637734_CD5L	677
cg04367093_cg04367093_NA	677
cg03094226_C11orf80	677
cg22904102_NAT1	676
cg11532578_KIF1B	676
cg14321042_cg14321042_NA	676
cg14768899_RAD18	676
cg16643706_NREP	675
ENSG00000182963_GJC1	675
cg24041338_cg24041338_NA	674
cg00886770_MRPS31P5	674
cg17403817_SLC35F1	674
cg14382547_cg14382547_NA	674
cg09392381_TLN2	674
cg07200608_cg07200608_NA	672
cg01766252_cg01766252_NA	672
cg18183941_NLRP3	672
cg08223915_TMCO3	671
cg11433629_BCLAF1	671
cg22232708_HMGCL	671
cg27380509_MAP2K4	669
cg21743914_ANGPT2,MCPH1	668
cg10832788_cg10832788_NA	668
cg04774620_ROBO1	668
cg16601590_cg16601590_NA	668
cg13754948_cg13754948_NA	668
cg10494615_GTF3C2,EIF2B4,SNX17	667
cg23229610_CAMTA1	667
cg03771739_PIP4K2A	667
cg23630248_DST	666
cg06733608_DAP	666
ENSG00000175066_GK5	666
cg15480305_MXD4,HAUS3,POLN	665
cg11578055_ZNF518B	665
cg06891869_cg06891869_NA	663
cg07960369_cg07960369_NA	663
cg00927503_cg00927503_NA	661
cg26763155_MYO16	661
cg05612346_SERGEF	661
cg04031411_DEXI,CLEC16A	661
cg15429179_APLP2	660
cg08892082_TRDMT1	660
cg21101995_NCK2	660
cg01188303_cg01188303_NA	660
cg00178506_cg00178506_NA	660
cg19118904_DNAJB6	660
cg12523424_MAD1L1	659
cg05404009_CMTM4	659
cg10146146_ACSL3	658
cg01639892_CASC15	658
ENSG00000154511_FAM69A	657
cg24542230_RNF213	657
cg14096744_cg14096744_NA	657
cg13090238_cg13090238_NA	657
cg13385644_BUD13	655
cg19371339_cg19371339_NA	655
cg00231812_cg00231812_NA	655
cg00745855_cg00745855_NA	655
cg16080958_SRPK2	654
cg24069286_SNX25,LRP2BP	654
cg19325477_PRKCA	654
cg26273072_STK33	654
cg17164151_cg17164151_NA	654
cg00647863_LRRK1	653
cg02678414_TRAF7,RAB26,SNHG19,SNORD60	653
cg20737554_NHLRC2,DCLRE1A	653
cg09791776_cg09791776_NA	653
ENSG00000138802_SEC24B	653
cg00391067_MORN2,ARHGEF33	652
cg26205321_cg26205321_NA	652
cg16218895_NEDD9	652
cg23565166_WDR27	652
cg11933744_cg11933744_NA	652
ENSG00000099219_ERMP1	652
ENSG00000189079_ARID2	652
cg21001457_BCAR3	651
cg04455869_ADCY2	651
cg15390741_EPS15	650
cg17016678_cg17016678_NA	650
cg04639421_HLA-DRA	650
cg02499814_cg02499814_NA	650
cg25424525_OTUD4	650
cg24726121_AGAP1	650
cg10748746_cg10748746_NA	650
cg07448909_MGMT	650
ENSG00000122484_RPAP2	650
cg04938109_SRGAP1	649
cg25416719_ATXN7L1	649
cg06894710_C10orf11	649
cg25108085_FAM155A	649
cg05960932_ARHGAP31	649
cg19857758_RYR2	648
cg09945896_ABCA3	648
cg00564061_KPNA5	648
cg19335064_APOL4	648
cg07869994_cg07869994_NA	647
cg26394380_cg26394380_NA	647
ENSG00000129003_VPS13C	647
cg04072337_cg04072337_NA	647
ENSG00000136925_TSTD2	647
cg14529643_ACAP3,SCNN1D	646
cg14403241_NCOA2	646
cg08851076_ASNA1,HOOK2	646
cg05028948_cg05028948_NA	646
cg02707114_cg02707114_NA	645
cg24543596_RAB13,RPS27,JTB	645
cg05014568_RADIL	644
cg19489146_DST	644
cg17525220_DENND3	644
cg11833244_POU6F1	644
cg05081144_RBM4B,SPTBN2	644
cg02720691_RFC1	643
cg13239227_CELSR3,NCKIPSD	643
cg07696918_NOC2L,PLEKHN1,KLHL17	642
cg06671614_CXCL12	642
cg09096067_FAM188A	642
cg17405646_TENM2	642
cg22696426_RGS10	642
cg00194886_LIN9	642
ENSG00000177200_CHD9	642
ENSG00000119906_SLF2	642
cg02211825_HMGN3-AS1,HMGN3	641
cg07486100_CHCHD3	640
cg15836028_NCALD	640
cg01232037_cg01232037_NA	640
cg18554866_C11orf74	640
cg06994832_cg06994832_NA	640
cg07994859_cg07994859_NA	640
cg24364144_SERBP1	639
cg21845300_PALLD	639
cg07457882_ZNF407	639
cg13672136_LTF	638
cg26920451_AVEN	638
cg03472349_cg03472349_NA	637
cg07174975_CENPQ,MUT	637
cg10920817_cg10920817_NA	637
cg15600669_MARCH3	637
ENSG00000186104_CYP2R1	637
cg17903506_cg17903506_NA	636
cg09286797_PLCB1	636
cg11467289_SBSPON	636
cg01690872_PLXNA4	636
cg20480497_cg20480497_NA	636
cg08996726_MAML3	636
cg21787848_cg21787848_NA	635
cg06721998_SIPA1L1	635
cg04048131_cg04048131_NA	635
ENSG00000163960_UBXN7	635
cg22813290_ADAMTS19	634
cg23947460_B3GNTL1	634
cg21526778_SDCCAG8	634
ENSG00000171817_ZNF540	634
ENSG00000181555_SETD2	634
cg00470192_RABEP2,CD19,NFATC2IP	633
cg02241545_MICAL3	633
ENSG00000167232_ZNF91	633
ENSG00000227176_AC092641.1	633
cg20794957_CNGB3	632
cg13856126_ANGPTL2,RALGPS1	632
cg06395634_LDLRAP1	632
cg03981286_PDIA5	632
ENSG00000052795_FNIP2	632
ENSG00000143776_CDC42BPA	632
cg01631277_PSMC6,STYX	631
cg01056135_cg01056135_NA	631
cg07005960_METRNL	630
cg00686926_cg00686926_NA	629
cg16248034_PIP5K1C	629
cg05374258_cg05374258_NA	629
ENSG00000197343_ZNF655	629
cg11630996_cg11630996_NA	628
cg06909254_ST3GAL5	627
cg03055942_LPCAT2	627
cg01043681_E2F7	627
cg06101900_ZDHHC4	627
cg09386615_GLIS3	627
cg08946618_GLB1L2	627
cg07887939_MROH1	627
ENSG00000233110_AC093797.1	627
cg17429842_ABL2	626
cg24900244_LRRC43,DIABLO	626
cg27254348_RBM20	626
cg18603679_LPP	626
cg09086987_SATB1,TBC1D5	626
cg25071674_AGO2	625
cg22263548_SYNGR1	625
cg22990125_CCDC36	625
cg26686366_TBXAS1	625
cg01798661_NEK3,NEK5	625
cg15411447_cg15411447_NA	625
cg01201348_DPY19L1	624
cg24719489_PBX1	624
cg01976002_cg01976002_NA	623
cg22764497_AGAP1	623
cg04952609_cg04952609_NA	623
cg04353763_RCOR1	623
cg14637787_cg14637787_NA	623
ENSG00000056277_ZNF280C	623
cg01837364_cg01837364_NA	622
cg03603924_ATP5G2,ATF7	622
ENSG00000198265_HELZ	622
cg11668053_cg11668053_NA	621
cg07320883_CFAP161	621
cg08984996_FARS2,LYRM4	621
cg14647580_TMEM151B	620
cg11244640_MAP3K4	620
cg15314542_ATP2B2	620
cg06094203_COL9A3,TCFL5	620
cg20826162_MEGF6	620
cg17347386_GLI3	620
cg11430766_NRXN1	620
cg09583036_RAB38	620
cg03652429_cg03652429_NA	619
cg09676171_cg09676171_NA	619
cg05131292_RFWD2	619
cg01756899_cg01756899_NA	619
ENSG00000115109_EPB41L5	619
cg23010913_cg23010913_NA	618
cg03225003_NPHP4	618
cg22353828_OSBPL5	618
cg11230471_SLFN12	618
ENSG00000113594_LIFR	618
cg19247005_COL26A1	617
cg24169773_WDR5B,KPNA1	617
cg17184255_VPS13D	617
cg03252499_cg03252499_NA	617
cg04923197_C10orf11	617
cg11340785_cg11340785_NA	616
cg04144714_LYST	616
cg23391368_cg23391368_NA	616
cg12368280_cg12368280_NA	615
cg02337583_ZBED6,ZC3H11A	615
cg22631203_cg22631203_NA	615
cg07136641_PLAG1	615
cg04828587_HMGB2,GALNT7	615
cg13012746_NEK10	614
cg21842916_MTA3	614
ENSG00000182986_ZNF320	614
cg03852659_MYT1L	613
cg15057373_FAM171B	613
cg12986236_ZFAND3	613
cg02646706_cg02646706_NA	613
cg02280599_cg02280599_NA	612
cg09913413_WHSC1	612
cg07813275_NPL	612
cg02578462_MAD1L1	611
cg16782236_MAEA	611
cg00267323_ANLN	611
cg16915506_ANK3	611
cg08727679_EXD3	611
cg07824497_cg07824497_NA	611
cg08845685_cg08845685_NA	610
cg11126708_RASGEF1C	609
cg14120827_ZCCHC6	609
cg16293639_cg16293639_NA	609
cg17977649_cg17977649_NA	609
ENSG00000108021_FAM208B	609
cg14857394_ZNF696,TOP1MT	608
cg02265810_cg02265810_NA	608
cg19710916_cg19710916_NA	608
cg16898219_EIF4G3	608
cg09734123_TMEM181	608
cg14124522_cg14124522_NA	608
cg24990989_PDAP1,BUD31,PTCD1	608
cg01569601_cg01569601_NA	607
cg21230565_SH3PXD2B	606
cg14309469_APBB2,NSUN7	606
cg23859051_SLC43A2	606
cg21926451_ADAMTS16	606
cg15741855_CAPN14	606
cg20745620_DUSP1	606
cg08313491_cg08313491_NA	606
cg19232164_REXO2	606
cg25904372_cg25904372_NA	606
cg23703633_ANK3	605
cg06633615_cg06633615_NA	605
cg15131883_DAB1	605
ENSG00000152894_PTPRK	605
cg24913355_cg24913355_NA	604
cg04835652_CEP83	604
cg04421523_HIVEP1	604
cg17501754_LSP1	603
cg13487655_SMOC1	603
cg01081813_UBASH3B	603
cg23814714_ATF6B	603
cg05729577_CELF4	603
cg26918935_TNFSF13B	602
cg08198936_cg08198936_NA	602
ENSG00000103657_HERC1	602
cg15598789_NPHP4	601
cg20689471_cg20689471_NA	601
cg16947025_cg16947025_NA	601
cg20900519_NCR3LG1,NUCB2	601
cg26356754_ZNF318	601
cg17095279_cg17095279_NA	601
cg04962978_SALL1	601
cg00213668_BAIAP2L1	600
cg03004126_cg03004126_NA	600
cg10402471_ZNF281	599
cg22720215_cg22720215_NA	599
cg02616565_cg02616565_NA	599
ENSG00000147162_OGT	599
cg04105712_cg04105712_NA	599
cg05457998_DST	598
cg08783639_ANXA5	598
cg08056061_cg08056061_NA	598
cg19447692_SLC26A2	598
cg20984735_PFN2	598
cg06519367_cg06519367_NA	598
cg16004439_cg16004439_NA	598
cg14440297_cg14440297_NA	598
cg21534574_LMBR1	597
cg09630706_FAM20C	597
ENSG00000189212_DPY19L2P1	597
cg14414876_AGA	597
cg01102232_DNAJC13	596
cg25741911_STRIP2	596
cg08954307_ATM,C11orf65	596
cg19215764_cg19215764_NA	596
cg23273316_NCKAP5	595
cg09103073_cg09103073_NA	595
ENSG00000166532_RIMKLB	595
cg25961952_C5orf66	594
cg25421941_USP6NL	594
cg05078091_APLP2	594
cg21176127_WARS	594
cg10981111_CAPZB	594
cg19157327_FN3KRP	594
cg09084892_FAT1	594
cg03325522_PURG	594
cg17972572_EIF3E	594
cg13041080_cg13041080_NA	593
cg18992201_cg18992201_NA	592
cg19692604_PPP1R15B	592
cg19587777_CALML3-AS1	592
cg13188202_MFSD5	592
cg05065177_DISC1	591
cg15136424_cg15136424_NA	591
ENSG00000272886_DCP1A	591
cg13995193_PIP5K1C	590
cg14724899_cg14724899_NA	590
cg18356515_TRIO	590
cg08699794_IFT140,TELO2	590
cg07618462_ARHGAP26	590
cg05396156_cg05396156_NA	589
cg22775108_cg22775108_NA	589
cg09181500_NUP133,ACTA1	589
cg05616819_PRKCB	589
ENSG00000111364_DDX55	589
cg23384406_AP3B2	588
cg03996398_cg03996398_NA	588
cg19645299_ESRRG	588
cg00688630_cg00688630_NA	588
cg20067138_cg20067138_NA	588
cg11834440_ZNF830,CCT6B	588
cg07395439_ZFHX3	587
cg07648698_AMPH	587
ENSG00000066427_ATXN3	587
cg14149503_cg14149503_NA	587
cg27242911_MICU1	586
cg03234603_PAFAH1B1	586
cg23783862_CHMP4C	586
cg17611446_POFUT2	586
cg13515808_LOXL4	586
cg27015047_cg27015047_NA	585
cg21590753_cg21590753_NA	585
cg20077773_cg20077773_NA	584
cg12127048_cg12127048_NA	584
cg26392328_PCTP	584
cg00421262_NPNT,INTS12	584
cg01562528_CHD1L	584
cg04401646_GRTP1,GRTP1-AS1	584
cg08461705_cg08461705_NA	584
cg10704545_GLRX2	584
cg06674275_ATP11A	583
ENSG00000178662_CSRNP3	583
cg07699149_XKR6	582
cg07415654_ANKRD28	582
cg24464502_CDH4	582
cg24345261_TRIM2	582
cg16779976_cg16779976_NA	582
cg13732216_SUFU	582
cg06617692_GNA14	582
cg27004870_PIEZO1	581
cg26345444_cg26345444_NA	581
cg10090418_FAM49A	581
cg11930274_NUDT13	581
cg04103198_SIRPB1,SIRPG	581
cg17448481_EXT1	580
cg16516490_CTSK,ARNT	580
cg21136358_cg21136358_NA	579
cg14318455_PELI3,DPP3,MRPL11	578
cg16022553_UBE2K,ZBTB12BP	578
cg25968469_ARHGAP22	578
cg04488174_cg04488174_NA	577
cg17076795_BEND5,AGBL4	577
cg26930889_SEC23A	577
cg11390489_ASPH	577
ENSG00000107036_RIC1	577
cg22911831_C19orf43,TNPO2	576
cg06021750_cg06021750_NA	576
cg04476839_cg04476839_NA	576
cg22134372_GNB5	575
cg26719638_cg26719638_NA	575
cg14720274_RORA	575
cg01382095_DCUN1D2,ADPRHL1	574
cg03519481_cg03519481_NA	574
cg05668317_ADAMTS9-AS2,ADAMTS9	574
cg17330652_SERPINC1	574
cg08559317_SMOC2	574
cg07153978_SPEF2	573
cg18583740_cg18583740_NA	573
cg06367527_XKR6	573
cg19586709_cg19586709_NA	573
cg13088038_PSD4	573
cg24875857_cg24875857_NA	572
cg17519763_PLEKHM3	572
cg00007326_CACNA1A	572
cg22377814_JAZF1	572
cg23908943_cg23908943_NA	572
cg14010472_SMU1,DNAJA1	572
cg02017814_NSMCE2	572
cg17375083_PFKL	572
cg16903689_cg16903689_NA	571
cg09495645_cg09495645_NA	571
cg12807746_LMAN2	571
cg26276470_SLC15A2,EAF2	570
cg23960088_AMACR	570
cg15413271_HNRNPC	570
cg00464025_RGL1,COLGALT2	570
cg16077226_ASRGL1	570
cg23844910_cg23844910_NA	570
cg26051540_SERPINE2	569
cg14599961_UBE3A	569
cg10560317_CAB39	569
cg14662172_CPB2-AS1	569
cg24665368_cg24665368_NA	569
cg02365517_cg02365517_NA	568
cg05693910_cg05693910_NA	568
cg16733670_KIAA0513	568
cg12281152_AGTRAP	568
cg00088148_ABHD1,PREB,CGREF1	567
cg18247090_MTUS2,MTUS2-AS1	567
cg03643116_HOOK2,MAST1	567
cg01740852_cg01740852_NA	567
cg01939872_TXNDC9,EIF5B	567
cg14576805_GUSB,VKORC1L1	567
cg11399974_cg11399974_NA	566
cg05565863_cg05565863_NA	566
cg01964170_BMP4	566
ENSG00000146350_TBC1D32	566
cg05609445_CSRP3,ZDHHC13	566
cg25046148_TSN	565
cg04203628_ZNF619	565
cg01810719_TECTA	565
cg25306089_cg25306089_NA	565
cg23750365_cg23750365_NA	565
cg07801506_cg07801506_NA	565
cg07095530_PLOD3,ZNHIT1	565
cg01424241_KANK1	564
cg26199552_cg26199552_NA	564
cg26247646_KIF1B	564
cg22062068_cg22062068_NA	564
cg07258788_KIAA1524,DZIP3	564
cg12974545_HRH1	564
cg19077794_cg19077794_NA	564
cg13305458_KIF17	564
cg00692774_CYS1	563
cg04817034_USP35,GAB2	563
cg03721808_cg03721808_NA	563
cg10157558_RHOBTB1	563
cg19674937_KLF12	563
cg22865176_MYT1L	563
cg25008152_cg25008152_NA	563
cg13472672_RELL1,C4orf19	563
ENSG00000070061_ELP1	563
cg20141229_WWC2	562
cg04835091_cg04835091_NA	562
cg17256192_CDH6	562
cg25148456_MAP3K1	562
cg00491577_NCOA1	562
cg03206179_FRMD5	562
cg10750264_KCNS3	562
cg26858716_AURKA,FAM210B	562
cg15700870_PPP2R2B	562
cg17296595_HMGN1P38,FAM174B	561
cg10225525_FUT8	561
cg00946243_AHSA1	561
cg23391473_cg23391473_NA	561
cg01433189_SLC28A2	561
cg21315173_FIGN	560
cg05999828_ULK4	560
cg21915449_cg21915449_NA	560
cg21529532_cg21529532_NA	560
cg24298696_PRDM16	560
ENSG00000138411_HECW2	560
cg04014586_KIF26B	559
cg20867603_LINC00689,VIPR2	558
cg18445426_cg18445426_NA	558
cg00045114_cg00045114_NA	558
cg26865274_cg26865274_NA	558
cg14229071_cg14229071_NA	558
cg13480658_AJAP1	557
cg09830278_SHOC2	557
cg01633442_PTPRN2	556
cg21659346_LINC01537,PDE2A	556
cg17787108_cg17787108_NA	556
cg15787551_cg15787551_NA	556
cg11231849_KLHL12	555
cg27563529_ATF7	555
cg00737208_ZNF594	555
cg00987890_CENPF	555
cg17612412_PPP1R9A,PON1	555
cg08658124_SIPA1L2	555
cg16028175_RCN3,NOSIP	554
cg10395519_MTHFD1L	554
ENSG00000152223_EPG5	554
cg18129046_ARSJ	553
cg08217593_cg08217593_NA	553
cg06961354_cg06961354_NA	553
cg05964918_cg05964918_NA	553
cg17202331_BTBD3	553
cg22803510_BCAR3,FNBP1L	553
cg16420063_CCHCR1	553
cg23687654_GATA3	552
cg13923497_FMNL2	552
cg21169285_MAPK9	552
cg14085606_STXBP1	552
cg19721554_ZNF366	552
cg18224503_EXOC2	552
cg00832491_cg00832491_NA	552
cg13657884_cg13657884_NA	552
cg21520613_SEPT11	551
cg26752613_NOD1	551
ENSG00000152402_GUCY1A2	551
cg03808027_LMLN	550
cg02740061_AP5Z1,RADIL	550
cg26843567_CHST11	550
cg23951816_TCF7L2	549
cg15324723_VPS13B	549
cg08996975_C9orf64	549
cg04525892_MSRB3	549
cg05785100_SMOC2	548
cg06842253_cg06842253_NA	548
cg11650164_BCAR3	548
cg03954393_cg03954393_NA	548
cg17142066_cg17142066_NA	548
cg17520144_cg17520144_NA	548
cg19736110_cg19736110_NA	548
cg25446191_SKIL	547
cg00037930_ATP11A	547
cg07671446_cg07671446_NA	547
cg15561933_cg15561933_NA	547
ENSG00000137449_CPEB2	547
cg24813206_cg24813206_NA	546
cg02230133_TSNARE1	546
ENSG00000125885_MCM8	546
cg05215011_DNAAF1,HSDL1	546
cg12405788_ZBTB4,POLR2A	546
cg14471671_USP35,GAB2	546
cg07939503_cg07939503_NA	546
ENSG00000196263_ZNF471	546
cg01004641_CDKL4	545
cg25729166_LINGO1	545
cg13153710_COL4A2	545
cg01591881_TBCB,POLR2I	545
cg01191064_LOX,SRFBP1	545
cg22894154_cg22894154_NA	545
cg25879118_PON3,PON1,PON2	545
cg17259761_EIF3KP1,PAM	545
cg16768320_TUBD1,NDUFB8P2,RPS6KB1	544
cg00889627_GABRD	544
cg02494512_NAGPA,ALG1	544
cg24738115_cg24738115_NA	544
cg17520681_SCG5	544
cg03972040_cg03972040_NA	544
cg12608775_TRIM66	543
cg08780063_TRIM37	543
cg08826384_SMARCC1	543
cg05817443_cg05817443_NA	543
cg01250703_cg01250703_NA	542
cg07421245_PPM1K	542
cg24214379_L3MBTL3	542
cg15921039_AARD	542
cg18285813_MET	542
cg23903708_DNMT3A	542
cg17157198_IKZF1	542
cg01983504_MIR103A2,RNF24,PANK2	541
cg23588928_FAM135A	541
cg21889691_cg21889691_NA	541
cg01620834_cg01620834_NA	540
cg22197708_MS4A2	540
cg08062713_GDF5	540
cg05203346_cg05203346_NA	540
cg08248886_DHX37	540
cg21241411_PFDN6,RGL2,TAPBP	540
cg02761110_MAGI1-IT1,MAGI1	540
cg19680583_EDIL3	540
cg19281809_UBXN2B	540
cg20154457_PEX5	540
cg17043339_TRAF5	539
cg22660530_SLC27A6	539
cg10220494_cg10220494_NA	539
cg05030351_cg05030351_NA	539
cg05100279_GAB2	538
cg03790312_LSAMP	538
cg01716527_SKIL	538
cg17182202_cg17182202_NA	538
ENSG00000088448_ANKRD10	538
cg15994519_PCNX1	537
cg07903425_REEP5	537
cg08067030_EIF4G2,ZBED5	537
cg02932904_EPS15	537
cg04162949_cg04162949_NA	537
cg10998146_cg10998146_NA	536
cg11663008_CDC27	536
cg06013895_cg06013895_NA	536
cg00814357_ZYG11B	536
cg09002726_cg09002726_NA	536
cg08983259_cg08983259_NA	536
cg00093436_C1orf216	535
cg07841371_TTLL10	535
cg21733560_SNX8,MRM2,NUDT1	535
ENSG00000165219_GAPVD1	535
cg10333144_ATP6V1H	535
cg19882512_cg19882512_NA	535
cg22855642_cg22855642_NA	535
cg23583742_CPNE1,RBM12	534
cg08130968_cg08130968_NA	534
cg09891066_PRKCZ	534
cg11905407_cg11905407_NA	534
cg09415148_cg09415148_NA	534
cg09743650_GSE1	534
cg09354589_cg09354589_NA	533
cg19563331_CASP6,MCUB,HIGD1AP14	533
cg09304624_PI15	533
cg18148021_PELI2	533
cg19009372_DOCK10	533
cg21526120_CCDC191,ZDHHC23	533
ENSG00000197779_ZNF81	533
cg14657915_DNAH9	532
cg17420132_RAP1GAP	532
cg04969331_TERF2,TMED6	532
cg24756642_cg24756642_NA	532
cg22453039_C17orf67	532
cg20053493_FNBP4	532
cg07596883_SPEN,ZBTB17	532
cg13255235_cg13255235_NA	532
cg17335001_DOCK1	532
cg06872673_PPIH,CCDC30	532
cg19094333_cg19094333_NA	531
cg01142353_FAM53A	531
cg27579131_KLHDC4	531
cg03703733_cg03703733_NA	531
cg21419585_FAM46C	531
cg21284524_cg21284524_NA	531
cg14457452_CDK5RAP2	531
cg07120972_cg07120972_NA	530
cg18531351_INAFM2	530
cg13214422_SYNPO,MYOZ3	530
cg05552957_cg05552957_NA	530
cg26053840_GLO1	530
cg11038887_FAM171A1	530
cg21457110_cg21457110_NA	530
cg17031475_GRASP,NR4A1	530
cg05839818_cg05839818_NA	529
cg24008395_VEZF1	529
cg22043275_EXOC6B	529
cg07521988_CDK14	529
cg01388565_cg01388565_NA	529
cg24540362_STK32B	529
cg04699162_TOLLIP,TOLLIP-AS1	529
ENSG00000173273_TNKS	529
cg06182923_CSMD2	528
cg06291505_NOG	528
cg06819473_PLEK	528
cg00534371_MOGS,CCDC142,MRPL53,TTC31	528
cg01889284_cg01889284_NA	528
ENSG00000257176_AC009318.1	528
cg13571224_PDGFC	527
cg20970945_cg20970945_NA	527
cg05012661_KIAA0232	527
cg03857640_SHCBP1	527
cg01222380_cg01222380_NA	527
cg27342505_RNF130	527
cg06708683_DBF4B	526
cg02579706_LPP	526
ENSG00000110344_UBE4A	526
ENSG00000170264_FAM161A	526
cg24987706_GPA33,DUSP27	525
cg13563732_CAMSAP1	525
cg04305440_cg04305440_NA	525
cg03793937_MTMR2	525
ENSG00000074935_TUBE1	525
cg02365754_MAML3	525
cg00771316_cg00771316_NA	525
cg01303059_ROR2	524
cg07282465_PSD3	524
cg18479322_PACRG-AS3,PACRG	524
cg01747926_cg01747926_NA	524
cg07979566_SMOC2	524
cg16772717_cg16772717_NA	524
cg18923933_DSCC1,TAF2	523
cg21878598_NANP	523
cg02933542_FAM234A,LUC7L	523
cg04113450_cg04113450_NA	523
cg07493307_cg07493307_NA	523
cg26251098_NTM	523
cg20223950_cg20223950_NA	522
cg00846968_SNU13,C22orf46	522
cg00238899_MXI1,SMNDC1	522
cg03026406_cg03026406_NA	522
cg03087163_cg03087163_NA	522
cg05376017_cg05376017_NA	522
cg26287521_cg26287521_NA	522
cg06212258_cg06212258_NA	522
cg12077176_FBXW8	522
cg15062411_RIMS3	521
cg08359717_ZBTB20	521
cg08264376_cg08264376_NA	521
cg09199609_ATP6V0E1	521
cg09236311_CLDN18	521
cg16694293_RPL36,LONP1	521
cg25390243_SLC19A1,COL18A1	521
cg11494437_BTD	521
cg17405139_ADGRD1	520
cg04556519_cg04556519_NA	520
cg26749976_CLIC1	520
cg19718771_cg19718771_NA	520
cg09212610_ZNF774,GABARAPL3	520
cg04846618_cg04846618_NA	520
cg10098370_cg10098370_NA	520
cg10441983_UVSSA	520
cg00864458_RPS20	520
cg14208013_GNAS	520
cg09179249_CASZ1	519
cg24432757_POLR1D	519
cg01005536_RAB11FIP3	519
cg02310273_ZNF35,ZNF197	519
cg02416336_cg02416336_NA	519
cg25392545_ST7	518
cg27354296_ZNF750,TBCD	518
cg05471725_cg05471725_NA	518
cg06942111_VAV3	518
cg07615493_ANKRD24	518
ENSG00000175455_CCDC14	518
cg12818658_FILIP1L,CMSS1	517
cg13374701_ZDHHC18	517
cg10760955_RANGAP1,CHADL	517
cg01144283_TECPR2,ANKRD9	517
cg05961160_cg05961160_NA	517
cg19227485_SLFN13	516
cg09971227_cg09971227_NA	516
cg00846498_BTBD7	516
cg08083088_cg08083088_NA	515
cg26389605_cg26389605_NA	515
cg02291620_PCNX2	515
cg02300711_cg02300711_NA	515
cg24112602_SPATA18	515
ENSG00000163516_ANKZF1	515
cg07561338_RBPMS	515
cg18983607_NCALD	515
cg03077492_CCL28	514
cg26192872_SYNE1	514
cg23126129_SIL1	514
cg02266759_cg02266759_NA	514
cg04106390_CACNA1H	514
cg23020582_COPZ1	514
cg05907764_PPP1R2P3	513
cg00885023_cg00885023_NA	513
cg07328565_cg07328565_NA	513
cg18794282_SPIDR	513
cg10216367_E2F7	513
cg08404557_cg08404557_NA	513
cg14803869_cg14803869_NA	512
cg07172339_ABL2	512
cg27000496_SLC45A4	512
cg12254248_RASA2	512
cg13632983_cg13632983_NA	512
cg02928935_COPS3	512
cg02117764_PLXND1	512
cg16466334_cg16466334_NA	511
cg26974035_cg26974035_NA	511
cg06843596_LYAR,ZBTB49	511
cg10316291_RBFOX1	511
cg12570263_MRPL35,REEP1	510
cg12648759_ATF6	510
cg27309038_cg27309038_NA	510
cg08955006_KIDINS220	510
cg00397849_TMIE,ALS2CL	510
cg01351787_cg01351787_NA	510
cg25976804_LZTR1,AIFM3	509
cg04350121_LINC00639	509
cg21885995_EXOC7,SRP68	509
cg15836710_NELFE	509
cg05736642_HTT	509
cg24864707_MIR100HG	508
cg13264770_KRBOX1,HIGD1A,ACKR2	508
cg01896804_PDE7B	508
ENSG00000174373_RALGAPA1	508
cg02522485_DAG1	508
cg11344073_EIF2AK2	507
cg23542572_PRKCA	507
cg15537788_DPF1,SIPA1L3	507
cg05847519_CDH13	507
cg11279454_DAXX,TAPBP	507
cg23674189_DUS3L,PRR22	506
cg06486618_CDC34,TPGS1	506
cg16958184_MYLK4	506
cg08820041_cg08820041_NA	506
cg19765351_cg19765351_NA	506
cg23332223_cg23332223_NA	506
cg04879211_TNS3	506
cg11085294_ASTN1	506
ENSG00000108654_DDX5	506
cg11721178_cg11721178_NA	505
cg02092708_FHL5	505
cg23519671_RYR1	505
cg11173609_FMNL2	505
cg00986047_cg00986047_NA	505
ENSG00000015479_MATR3	505
cg10887366_WDFY4	504
cg21878385_FIP1L1,LNX1	504
ENSG00000196329_GIMAP5	504
cg13807668_MIR4292,RABL6	504
cg09101767_MAD2L1BP,POLH,GTPBP2	504
cg15693736_GRTP1-AS1,GRTP1	503
cg06906087_FASN,CCDC57	503
cg10024505_ESRRB	503
cg07431944_IFT140,TMEM204	503
cg24613097_TMEM132C	503
cg27048432_LYPD1	503
cg14040931_GNE,CLTA	502
cg13775593_cg13775593_NA	502
cg26852242_PLEKHG1	502
cg24034459_TNFAIP8L3	502
cg18737789_LRRC4C	502
cg13435792_ARHGDIB,ERP27	502
cg08571764_ZNF282,ZNF398	502
ENSG00000269982_AC018809.2	502
cg03759993_TNFRSF19	501
cg13042636_RHOF,TMEM120B	501
cg23479949_KCNIP1	501
cg19537243_SAMD12	500
cg03612485_cg03612485_NA	500
cg09858392_cg09858392_NA	500
cg22710238_cg22710238_NA	500
cg02564302_DCBLD2	500
cg17919004_cg17919004_NA	500
cg21183389_ANK2	500
cg16891968_HLA-F,HLA-F-AS1	500
cg15958828_FOXP1	500
ENSG00000198315_ZKSCAN8	500
cg02974976_NAP1L4P1,CD58	499
cg26820378_PEX14	499
cg25405138_PARD3	499
cg09247020_cg09247020_NA	499
cg04759112_CMIP	499
cg15345477_cg15345477_NA	499
cg26342177_APOL5	499
cg07910552_ADGRL2	498
cg25325543_cg25325543_NA	498
cg17518348_HMGA2	498
cg05302035_KIF11	498
cg01188235_cg01188235_NA	498
cg20200811_FAM221A	498
cg19353326_cg19353326_NA	498
cg00364696_GPER1,C7orf50	498
ENSG00000122912_SLC25A16	498
cg09509503_DAB1	498
cg06730409_cg06730409_NA	497
cg02480489_ZDHHC7	497
cg14802742_cg14802742_NA	497
cg21951459_ANGEL2	497
cg25479617_LYPD6	497
cg13451597_PLPP3	497
cg00750307_THAP11,NUTF2,CENPT	497
cg01800500_cg01800500_NA	497
cg01531915_RASGRP4	497
cg24117963_PLCB2,PAK6	497
cg07331701_B4GALT6	496
cg10990959_cg10990959_NA	496
cg06875488_SORCS2	496
cg17384124_ANKRD44	496
cg14418119_cg14418119_NA	495
cg19828338_GMDS	495
cg15717844_cg15717844_NA	495
cg12876517_UGP2	495
cg17489342_cg17489342_NA	495
cg11655564_ZNF268,ZNF10,ZNF891	494
cg26711184_cg26711184_NA	494
cg20290491_ARFGEF3	494
cg06461071_ARL15	494
cg21762728_ERMARD	493
cg09259534_RRP15	493
cg20830699_CCDC174,C3orf20	493
cg12615903_LHPP	493
cg14305641_MBD3,MEX3D	493
cg01940460_INPP1,HIBCH	493
cg20567361_HIBADH	493
cg05755779_COLEC10	493
cg18312118_KIF1B	492
cg01489398_ACE	492
cg22135064_cg22135064_NA	492
cg15508462_cg15508462_NA	492
cg24617091_RANBP9,NOL7,SIRT5	491
cg01218150_cg01218150_NA	491
cg05069431_cg05069431_NA	491
cg19694923_DIRAS3,GNG12-AS1	491
cg14095593_cg14095593_NA	491
cg06567596_LMTK2	490
cg19053250_UNC80	490
cg14663333_PCDH12,RNF14	489
cg16808481_TES	489
cg26131315_MAML3	489
cg05249460_UBE2G1	489
cg26548682_DNAJC6	489
cg01439753_CMIP	489
cg12025380_TACR2,HK1	489
cg13766642_cg13766642_NA	488
cg04414629_cg04414629_NA	488
cg18507032_RPLP0P2	488
cg23680787_cg23680787_NA	488
cg01275934_SNX8,NUDT1	488
cg11193201_FCRLA	488
cg04948016_cg04948016_NA	488
cg17152135_SYNGAP1,PHF1,CUTA	487
cg13777513_PLEKHO2,PIF1	487
cg26794647_cg26794647_NA	487
cg09409126_ESRRAP2	487
cg19401752_cg19401752_NA	487
cg16199907_EXOC2	487
cg04200562_UBE2D2	487
cg13130398_RABGAP1L	487
cg03406626_MAML2	486
cg02542748_cg02542748_NA	486
cg03880814_EDARADD	486
cg20740203_CPEB3	486
cg25740250_PTPRN2	486
cg08149459_LRRC74A	486
cg25748524_cg25748524_NA	485
cg06217267_HERC3	485
cg16413715_UNC5A	485
cg05062192_cg05062192_NA	485
cg02948656_MPHOSPH9,PITPNM2	485
cg00244391_CEP57L1,SESN1	485
ENSG00000257093_KIAA1147	485
cg24902339_CASC2	484
cg00445591_EEFSEC	484
cg16376484_CLEC4E	484
cg08609477_cg08609477_NA	484
cg03561389_NCBP2,PIGZ,SENP5,NCBP2-AS2,NCBP2-AS1	484
ENSG00000229036_VDAC1P8	484
cg08338368_IFNG-AS1	483
cg02646471_CLDN11	483
cg13635022_ZNF462	483
cg26345613_cg26345613_NA	483
cg04349162_POLG2	483
cg02985694_cg02985694_NA	483
cg12793123_ADORA2A,ADORA2A-AS1,SPECC1L	482
cg15636519_STAT1,STAT4	482
cg25330387_CLDN1	482
cg18205372_AHRR	482
cg00417323_LRRC37A7P	482
cg15189031_PACSIN1,SPDEF	481
cg10550611_EGFR	481
cg27157669_KLHL42	481
[truncated: 13,531 more rows]

## Sheet: LF3_node_degree
feature	degree
ENSG00000164128_NPY1R	9082
ENSG00000101871_MID1	7850
ENSG00000111339_ART4	7764
ENSG00000138821_SLC39A8	7546
ENSG00000143549_TPM3	7536
ENSG00000170876_TMEM43	7504
ENSG00000164294_GPX8	7503
ENSG00000196975_ANXA4	7455
ENSG00000183091_NEB	7360
ENSG00000132561_MATN2	7336
ENSG00000182168_UNC5C	7312
ENSG00000184347_SLIT3	7234
ENSG00000128918_ALDH1A2	7152
ENSG00000101938_CHRDL1	6947
ENSG00000150540_HNMT	6940
ENSG00000109944_C11orf63	6917
ENSG00000110318_CEP126	6878
ENSG00000162989_KCNJ3	6856
ENSG00000116574_RHOU	6808
ENSG00000149218_ENDOD1	6805
ENSG00000122870_BICC1	6799
ENSG00000187672_ERC2	6752
ENSG00000198431_TXNRD1	6658
ENSG00000048540_LMO3	6560
ENSG00000213846_AC098614.1	6557
ENSG00000182326_C1S	6556
ENSG00000106809_OGN	6489
ENSG00000116711_PLA2G4A	6465
ENSG00000147257_GPC3	6407
ENSG00000198121_LPAR1	6176
ENSG00000163932_PRKCD	6170
ENSG00000065534_MYLK	6170
ENSG00000163630_SYNPR	6152
ENSG00000112936_C7	6127
ENSG00000134531_EMP1	5980
ENSG00000140807_NKD1	5949
ENSG00000137501_SYTL2	5937
ENSG00000136052_SLC41A2	5916
ENSG00000257242_LINC01619	5903
ENSG00000131016_AKAP12	5895
ENSG00000050405_LIMA1	5887
ENSG00000187955_COL14A1	5879
ENSG00000178202_KDELC2	5864
ENSG00000154175_ABI3BP	5824
ENSG00000138134_STAMBPL1	5788
ENSG00000137033_IL33	5754
ENSG00000107611_CUBN	5738
ENSG00000114698_PLSCR4	5658
ENSG00000134874_DZIP1	5647
ENSG00000071991_CDH19	5620
ENSG00000115592_PRKAG3	5589
ENSG00000041982_TNC	5586
ENSG00000091986_CCDC80	5569
ENSG00000044524_EPHA3	5538
ENSG00000187151_ANGPTL5	5529
ENSG00000128606_LRRC17	5514
ENSG00000173068_BNC2	5462
ENSG00000166963_MAP1A	5458
ENSG00000105928_DFNA5	5439
ENSG00000133026_MYH10	5388
ENSG00000129596_CDO1	5380
ENSG00000110675_ELMOD1	5335
ENSG00000166839_ANKDD1A	5328
ENSG00000139910_NOVA1	5325
ENSG00000155265_GOLGA7B	5319
ENSG00000182107_TMEM30B	5310
ENSG00000148082_SHC3	5305
ENSG00000118762_PKD2	5262
ENSG00000162520_SYNC	5256
ENSG00000152217_SETBP1	5239
ENSG00000224238_WARS2-IT1	5236
ENSG00000163618_CADPS	5234
ENSG00000138311_ZNF365	5213
ENSG00000277270_AL160412.1	5163
ENSG00000118523_CTGF	5150
ENSG00000115310_RTN4	5105
ENSG00000131873_CHSY1	5069
ENSG00000163629_PTPN13	5029
ENSG00000164038_SLC9B2	5025
ENSG00000102010_BMX	5010
ENSG00000140937_CDH11	4999
ENSG00000138356_AOX1	4985
ENSG00000103489_XYLT1	4985
ENSG00000158571_PFKFB1	4904
ENSG00000092607_TBX15	4899
ENSG00000185561_TLCD2	4859
ENSG00000269378_AC022149.1	4749
ENSG00000106070_GRB10	4745
ENSG00000109472_CPE	4729
ENSG00000099960_SLC7A4	4728
ENSG00000137809_ITGA11	4706
ENSG00000138801_PAPSS1	4704
ENSG00000050327_ARHGEF5	4697
ENSG00000114790_ARHGEF26	4689
ENSG00000168679_SLC16A4	4669
ENSG00000185070_FLRT2	4668
ENSG00000174740_PABPC5	4660
ENSG00000049323_LTBP1	4648
ENSG00000137573_SULF1	4637
ENSG00000125675_GRIA3	4634
ENSG00000135750_KCNK1	4633
ENSG00000165675_ENOX2	4586
ENSG00000065320_NTN1	4563
ENSG00000163431_LMOD1	4541
ENSG00000117020_AKT3	4519
ENSG00000198108_CHSY3	4516
ENSG00000082397_EPB41L3	4458
ENSG00000166035_LIPC	4448
ENSG00000133131_MORC4	4364
ENSG00000150625_GPM6A	4350
ENSG00000102935_ZNF423	4341
ENSG00000128833_MYO5C	4339
ENSG00000153246_PLA2R1	4327
ENSG00000111879_FAM184A	4317
ENSG00000138735_PDE5A	4311
ENSG00000170370_EMX2	4294
ENSG00000106823_ECM2	4237
ENSG00000157193_LRP8	4221
ENSG00000137478_FCHSD2	4208
ENSG00000164188_RANBP3L	4208
ENSG00000135318_NT5E	4203
ENSG00000116106_EPHA4	4197
ENSG00000155660_PDIA4	4189
ENSG00000198513_ATL1	4082
ENSG00000162946_DISC1	4068
ENSG00000125845_BMP2	4043
ENSG00000144677_CTDSPL	3983
ENSG00000129472_RAB2B	3983
ENSG00000152580_IGSF10	3980
ENSG00000156140_ADAMTS3	3975
ENSG00000246214_AC022113.1	3967
ENSG00000133789_SWAP70	3929
ENSG00000145284_SCD5	3928
ENSG00000131323_TRAF3	3913
ENSG00000165124_SVEP1	3873
ENSG00000197535_MYO5A	3866
ENSG00000112210_RAB23	3851
ENSG00000104447_TRPS1	3846
ENSG00000120693_SMAD9	3840
ENSG00000138758_SEPT11	3836
ENSG00000136010_ALDH1L2	3829
ENSG00000104549_SQLE	3816
ENSG00000264384_RN7SL431P	3806
ENSG00000122707_RECK	3777
ENSG00000111817_DSE	3748
ENSG00000166888_STAT6	3734
ENSG00000119771_KLHL29	3702
ENSG00000153012_LGI2	3699
ENSG00000182240_BACE2	3688
ENSG00000148053_NTRK2	3684
ENSG00000229619_MBNL1-AS1	3682
ENSG00000143845_ETNK2	3669
ENSG00000165259_HDX	3637
ENSG00000010404_IDS	3628
ENSG00000162636_FAM102B	3607
ENSG00000134363_FST	3603
ENSG00000205726_ITSN1	3600
ENSG00000107130_NCS1	3592
ENSG00000165449_SLC16A9	3590
ENSG00000087116_ADAMTS2	3552
ENSG00000184743_ATL3	3527
ENSG00000106536_POU6F2	3520
ENSG00000169554_ZEB2	3509
ENSG00000124212_PTGIS	3508
ENSG00000113083_LOX	3488
ENSG00000151491_EPS8	3483
ENSG00000167323_STIM1	3460
ENSG00000169855_ROBO1	3454
ENSG00000104368_PLAT	3447
ENSG00000135338_LCA5	3442
ENSG00000111912_NCOA7	3426
ENSG00000115414_FN1	3420
ENSG00000118526_TCF21	3414
ENSG00000176597_B3GNT5	3412
ENSG00000178732_GP5	3406
ENSG00000215241_LINC02449	3403
ENSG00000143127_ITGA10	3389
ENSG00000141655_TNFRSF11A	3346
ENSG00000151746_BICD1	3327
ENSG00000136404_TM6SF1	3316
ENSG00000145246_ATP10D	3294
ENSG00000117477_CCDC181	3279
ENSG00000178904_DPY19L3	3258
ENSG00000196950_SLC39A10	3251
ENSG00000122786_CALD1	3251
ENSG00000279742_AP000974.1	3250
ENSG00000154864_PIEZO2	3234
ENSG00000162687_KCNT2	3213
ENSG00000151065_DCP1B	3189
ENSG00000077238_IL4R	3188
ENSG00000170004_CHD3	3188
ENSG00000107566_ERLIN1	3184
ENSG00000065154_OAT	3171
ENSG00000109814_UGDH	3155
ENSG00000166734_CASC4	3137
ENSG00000185432_METTL7A	3137
ENSG00000181104_F2R	3133
ENSG00000235531_MSC-AS1	3125
ENSG00000114670_NEK11	3121
ENSG00000231721_LINC-PINT	3117
ENSG00000123453_SARDH	3101
ENSG00000100228_RAB36	3092
ENSG00000233117_LINC00702	3070
ENSG00000182463_TSHZ2	3069
ENSG00000163359_COL6A3	3067
ENSG00000187240_DYNC2H1	3065
ENSG00000079691_CARMIL1	3054
ENSG00000123643_SLC36A1	3053
ENSG00000004660_CAMKK1	3024
ENSG00000182158_CREB3L2	3005
ENSG00000198075_SULT1C4	2970
ENSG00000158467_AHCYL2	2970
ENSG00000142686_C1orf216	2963
ENSG00000135090_TAOK3	2949
ENSG00000143147_GPR161	2921
ENSG00000132780_NASP	2908
ENSG00000110076_NRXN2	2895
ENSG00000164056_SPRY1	2882
ENSG00000166250_CLMP	2867
ENSG00000184867_ARMCX2	2849
ENSG00000100234_TIMP3	2846
ENSG00000102385_DRP2	2808
ENSG00000145390_USP53	2805
ENSG00000111647_UHRF1BP1L	2805
ENSG00000133101_CCNA1	2802
ENSG00000105270_CLIP3	2796
ENSG00000152583_SPARCL1	2783
ENSG00000174640_SLCO2A1	2779
ENSG00000171943_SRGAP2C	2777
ENSG00000150995_ITPR1	2775
ENSG00000107984_DKK1	2766
ENSG00000169379_ARL13B	2752
ENSG00000133138_TBC1D8B	2748
ENSG00000128487_SPECC1	2747
ENSG00000206535_LNP1	2745
ENSG00000130340_SNX9	2702
ENSG00000103257_SLC7A5	2695
ENSG00000117152_RGS4	2686
ENSG00000164692_COL1A2	2679
ENSG00000169439_SDC2	2662
ENSG00000106799_TGFBR1	2660
ENSG00000079819_EPB41L2	2655
ENSG00000174705_SH3PXD2B	2647
ENSG00000206190_ATP10A	2641
ENSG00000101825_MXRA5	2635
ENSG00000107164_FUBP3	2634
ENSG00000186340_THBS2	2630
ENSG00000164932_CTHRC1	2611
ENSG00000198959_TGM2	2603
ENSG00000059573_ALDH18A1	2587
ENSG00000131370_SH3BP5	2585
ENSG00000119042_SATB2	2583
ENSG00000164251_F2RL1	2580
ENSG00000145908_ZNF300	2579
ENSG00000198780_FAM169A	2579
ENSG00000173715_C11orf80	2572
ENSG00000168386_FILIP1L	2563
ENSG00000163346_PBXIP1	2562
ENSG00000180354_MTURN	2552
ENSG00000236914_LINC01852	2524
ENSG00000136237_RAPGEF5	2510
ENSG00000166949_SMAD3	2500
ENSG00000174348_PODN	2464
ENSG00000089472_HEPH	2429
ENSG00000173905_GOLIM4	2423
ENSG00000246379_AC007495.1	2418
ENSG00000162885_B3GALNT2	2405
ENSG00000156466_GDF6	2403
ENSG00000122966_CIT	2392
ENSG00000135406_PRPH	2380
ENSG00000137693_YAP1	2371
ENSG00000103995_CEP152	2371
ENSG00000108231_LGI1	2360
ENSG00000111799_COL12A1	2353
ENSG00000196199_MPHOSPH8	2321
ENSG00000134250_NOTCH2	2319
ENSG00000010278_CD9	2313
ENSG00000067445_TRO	2310
ENSG00000163430_FSTL1	2306
ENSG00000263465_SRSF8	2296
ENSG00000182405_PGBD4	2293
ENSG00000143515_ATP8B2	2227
ENSG00000164946_FREM1	2223
ENSG00000227992_AC108463.1	2198
ENSG00000145623_OSMR	2196
ENSG00000196526_AFAP1	2193
ENSG00000075151_EIF4G3	2183
ENSG00000277363_SRCIN1	2175
ENSG00000197467_COL13A1	2167
ENSG00000131711_MAP1B	2156
ENSG00000076706_MCAM	2152
ENSG00000144218_AFF3	2148
ENSG00000101384_JAG1	2128
ENSG00000076356_PLXNA2	2125
ENSG00000135720_DYNC1LI2	2116
ENSG00000064692_SNCAIP	2112
ENSG00000136367_ZFHX2	2096
ENSG00000165617_DACT1	2063
ENSG00000131389_SLC6A6	2061
ENSG00000158815_FGF17	2055
ENSG00000198756_COLGALT2	2049
ENSG00000225648_SBDSP1	2039
ENSG00000166016_ABTB2	2004
ENSG00000198932_GPRASP1	1990
ENSG00000198920_KIAA0753	1989
ENSG00000270547_LINC01235	1986
ENSG00000162733_DDR2	1984
ENSG00000275004_ZNF280B	1965
ENSG00000171502_COL24A1	1960
ENSG00000145545_SRD5A1	1941
ENSG00000163071_SPATA18	1933
ENSG00000167202_TBC1D2B	1922
ENSG00000123104_ITPR2	1918
ENSG00000117461_PIK3R3	1913
ENSG00000114315_HES1	1906
ENSG00000164520_RAET1E	1906
ENSG00000282732_AC073539.7	1899
ENSG00000078018_MAP2	1889
ENSG00000123200_ZC3H13	1883
ENSG00000227477_STK4-AS1	1879
ENSG00000240021_TEX35	1875
ENSG00000170832_USP32	1871
ENSG00000254944_ATP5F1P5	1851
ENSG00000196562_SULF2	1848
ENSG00000142949_PTPRF	1833
ENSG00000168542_COL3A1	1828
ENSG00000238120_LINC01589	1821
ENSG00000165097_KDM1B	1817
ENSG00000163040_CCDC74A	1817
ENSG00000270890_AL049844.2	1793
ENSG00000136944_LMX1B	1789
ENSG00000108759_KRT32	1779
ENSG00000166147_FBN1	1779
ENSG00000180447_GAS1	1763
ENSG00000091622_PITPNM3	1755
ENSG00000143079_CTTNBP2NL	1755
ENSG00000115355_CCDC88A	1753
ENSG00000137494_ANKRD42	1753
ENSG00000163909_HEYL	1745
ENSG00000169594_BNC1	1733
ENSG00000017797_RALBP1	1719
ENSG00000150760_DOCK1	1695
ENSG00000188153_COL4A5	1691
ENSG00000239523_MYLK-AS1	1680
ENSG00000164129_NPY5R	1680
ENSG00000100644_HIF1A	1675
ENSG00000121297_TSHZ3	1668
ENSG00000081052_COL4A4	1657
ENSG00000163898_LIPH	1629
ENSG00000197122_SRC	1614
ENSG00000240694_PNMA2	1611
ENSG00000204262_COL5A2	1590
ENSG00000139155_SLCO1C1	1580
ENSG00000079156_OSBPL6	1562
ENSG00000112249_ASCC3	1557
ENSG00000176903_PNMA1	1556
ENSG00000054793_ATP9A	1541
ENSG00000142192_APP	1540
ENSG00000011028_MRC2	1539
ENSG00000157680_DGKI	1536
ENSG00000070371_CLTCL1	1517
ENSG00000254535_PABPC4L	1514
ENSG00000126803_HSPA2	1514
ENSG00000236393_AC091806.1	1514
ENSG00000143514_TP53BP2	1497
ENSG00000259426_AC027237.3	1496
ENSG00000151882_CCL28	1492
ENSG00000268279_AC090004.1	1490
ENSG00000206527_HACD2	1469
ENSG00000169071_ROR2	1468
ENSG00000148948_LRRC4C	1454
ENSG00000102057_KCND1	1445
ENSG00000146242_TPBG	1427
ENSG00000154065_ANKRD29	1424
ENSG00000149633_KIAA1755	1422
ENSG00000205730_ITPRIPL2	1418
ENSG00000187391_MAGI2	1415
ENSG00000173230_GOLGB1	1395
ENSG00000139835_GRTP1	1390
ENSG00000144792_ZNF660	1371
ENSG00000176641_RNF152	1369
ENSG00000084234_APLP2	1357
ENSG00000007237_GAS7	1351
ENSG00000185022_MAFF	1340
ENSG00000073417_PDE8A	1338
ENSG00000152669_CCNO	1337
ENSG00000144366_GULP1	1334
ENSG00000077063_CTTNBP2	1327
ENSG00000131620_ANO1	1316
ENSG00000181773_GPR3	1305
ENSG00000133019_CHRM3	1294
ENSG00000198064_NPIPB13	1289
ENSG00000185046_ANKS1B	1289
ENSG00000013364_MVP	1288
ENSG00000228343_AC115618.2	1287
ENSG00000197465_GYPE	1281
ENSG00000183691_NOG	1268
ENSG00000163637_PRICKLE2	1265
ENSG00000169871_TRIM56	1262
ENSG00000110931_CAMKK2	1260
ENSG00000154767_XPC	1229
ENSG00000110906_KCTD10	1229
ENSG00000256229_ZNF486	1215
ENSG00000157617_C2CD2	1208
ENSG00000100266_PACSIN2	1190
ENSG00000170011_MYRIP	1169
ENSG00000131473_ACLY	1153
ENSG00000048649_RSF1	1145
ENSG00000181778_TMEM252	1142
ENSG00000147044_CASK	1135
ENSG00000267372_AC005330.1	1128
ENSG00000091136_LAMB1	1119
ENSG00000221866_PLXNA4	1115
ENSG00000138792_ENPEP	1093
ENSG00000143776_CDC42BPA	1082
ENSG00000089505_CMTM1	1070
ENSG00000100968_NFATC4	1068
ENSG00000273218_AC005776.2	1062
ENSG00000272983_AL117339.4	1062
ENSG00000154889_MPPE1	1054
ENSG00000150403_TMCO3	1042
ENSG00000119699_TGFB3	1040
ENSG00000251414_AC138956.2	1035
ENSG00000151503_NCAPD3	1030
ENSG00000053747_LAMA3	1028
ENSG00000278530_CHMP1B2P	1027
ENSG00000125844_RRBP1	995
ENSG00000204054_LINC00963	984
ENSG00000132470_ITGB4	964
ENSG00000155189_AGPAT5	964
ENSG00000120256_LRP11	960
ENSG00000160746_ANO10	945
ENSG00000132718_SYT11	939
ENSG00000226137_BAIAP2-AS1	936
ENSG00000175772_LINC01106	929
ENSG00000090615_GOLGA3	926
ENSG00000135744_AGT	924
ENSG00000072840_EVC	924
ENSG00000145794_MEGF10	924
ENSG00000072110_ACTN1	912
ENSG00000183853_KIRREL1	912
ENSG00000107731_UNC5B	903
ENSG00000100181_TPTEP1	897
ENSG00000243069_ARHGEF26-AS1	888
ENSG00000235257_ITGA9-AS1	884
ENSG00000187678_SPRY4	879
ENSG00000178752_ERFE	878
ENSG00000112837_TBX18	875
ENSG00000106511_MEOX2	870
ENSG00000088854_C20orf194	862
ENSG00000143603_KCNN3	860
ENSG00000142207_URB1	859
ENSG00000198682_PAPSS2	854
ENSG00000053108_FSTL4	854
ENSG00000144857_BOC	849
ENSG00000135931_ARMC9	847
ENSG00000231530_AL157932.1	841
ENSG00000231365_AL359915.2	831
ENSG00000099139_PCSK5	823
ENSG00000169031_COL4A3	823
ENSG00000271755_AL031118.1	820
ENSG00000163734_CXCL3	810
ENSG00000067369_TP53BP1	797
ENSG00000082805_ERC1	796
ENSG00000156103_MMP16	781
ENSG00000143341_HMCN1	780
ENSG00000074621_SLC24A1	777
ENSG00000272150_NBPF25P	767
ENSG00000127946_HIP1	754
ENSG00000167110_GOLGA2	752
ENSG00000157657_ZNF618	743
ENSG00000238197_PAXBP1-AS1	741
ENSG00000164197_RNF180	737
ENSG00000203722_RAET1G	726
ENSG00000237451_CDK2AP2P2	724
ENSG00000241634_AC069499.1	703
ENSG00000008256_CYTH3	702
ENSG00000116117_PARD3B	701
ENSG00000149571_KIRREL3	696
ENSG00000258441_LINC00641	694
ENSG00000163749_CCDC158	693
ENSG00000069188_SDK2	689
ENSG00000196440_ARMCX4	658
ENSG00000166579_NDEL1	652
ENSG00000259207_ITGB3	618
ENSG00000151208_DLG5	615
ENSG00000154040_CABYR	595
ENSG00000149115_TNKS1BP1	592
ENSG00000273749_CYFIP1	582
ENSG00000005884_ITGA3	579
ENSG00000130508_PXDN	578
ENSG00000130309_COLGALT1	568
ENSG00000089916_GPATCH2L	561
ENSG00000169062_UPF3A	556
ENSG00000091831_ESR1	556
ENSG00000011275_RNF216	554
ENSG00000090020_SLC9A1	551
ENSG00000155093_PTPRN2	548
ENSG00000256061_DNAAF4	542
ENSG00000101350_KIF3B	541
ENSG00000100014_SPECC1L	540
ENSG00000143641_GALNT2	540
ENSG00000107863_ARHGAP21	506
ENSG00000265519_AC015922.3	503
ENSG00000103196_CRISPLD2	503
ENSG00000265399_AP005329.2	490
ENSG00000131080_EDA2R	490
ENSG00000140526_ABHD2	484
ENSG00000240184_PCDHGC3	468
ENSG00000130635_COL5A1	465
ENSG00000124839_RAB17	449
ENSG00000072832_CRMP1	447
ENSG00000187942_LDLRAD2	441
ENSG00000204291_COL15A1	437
ENSG00000148358_GPR107	433
ENSG00000234709_UPF3AP3	431
ENSG00000128849_CGNL1	429
cg12599850_F3	423
ENSG00000156218_ADAMTSL3	422
ENSG00000135506_OS9	419
ENSG00000090924_PLEKHG2	418
ENSG00000173269_MMRN2	416
cg10715527_ANK1	412
ENSG00000184984_CHRM5	411
cg09406760_cg09406760_NA	409
ENSG00000184319_RPL23AP82	409
ENSG00000157103_SLC6A1	408
ENSG00000149256_TENM4	407
ENSG00000058262_SEC61A1	406
ENSG00000196109_ZNF676	398
cg16907527_VEGFA	397
ENSG00000220685_AL139094.1	397
cg24779170_cg24779170_NA	389
cg18063659_AFG3L2	388
cg18320370_DPF3	386
cg01921818_DCUN1D2,ADPRHL1	386
ENSG00000183655_KLHL25	386
cg00512563_cg00512563_NA	376
cg18052528_TNIK	374
cg08103706_MT1X	370
cg02430183_WNK2	368
cg20695499_TBC1D5	367
cg02638567_WBSCR17	367
cg22593177_FAM213A	364
cg11275750_NDUFA10	364
cg22010909_ATP11A	364
ENSG00000160293_VAV2	362
cg22128328_PTPRN2	360
cg19294117_TST,MPST	360
cg13344886_CDCP1	360
cg12664119_TBX15	359
cg03224650_OBSCN	359
cg00361609_FGF18	358
cg19251161_ITPRIP	358
cg03356537_ATP11A	355
cg17993335_DNMBP	355
cg01246398_ADCY5	354
cg26394191_MYLK	354
cg15443067_B4GALNT3	354
cg15457037_UCKL1,DNAJC5	354
cg19854293_SLC12A7	353
cg12845177_MYO1F	352
cg19068479_CD81,CD81-AS1	352
cg01219924_BAIAP2-AS1,BAIAP2	351
cg11575644_TYK2	351
cg25364726_C10orf71,C10orf71-AS1	350
cg27050818_SMIM5,MYO15B,RECQL5	350
cg18760055_CASZ1	350
cg05236720_CDC42EP3	349
cg11707796_cg11707796_NA	349
cg00873919_SLMAP	349
cg08303483_C10orf71,C10orf71-AS1	349
ENSG00000102359_SRPX2	349
cg21944767_DHRS3	348
cg00767058_DCUN1D2,ADPRHL1	348
cg27056129_MRPL12,HGS,SLC25A10	348
cg05888583_PGBD5	347
cg16109862_ASB2,MIR4506	347
cg06881898_F3	347
cg10794439_ANK1	347
cg23614123_ATP11A	346
cg08598988_ADCY5	346
cg21163969_ATP11A	346
cg14225031_LMX1B	346
cg01351992_CACNA1H	345
cg09013267_LMAN2	344
cg10161743_GRIN2D	344
cg16301004_ITPRIP	344
cg12008118_LDB3,OPN4	344
cg25599573_HRH2	342
cg04162299_DOCK4	341
cg24585203_cg24585203_NA	341
cg00590639_TYK2	341
cg00352872_DHRS7C	340
cg01640443_DYNC1H1	340
cg20427198_GRAMD4	339
cg20014988_SGMS1	338
ENSG00000089057_SLC23A2	338
cg08663298_ABTB2	337
cg26536863_LINC00689	336
cg08274552_SLC4A3	335
cg10600647_BCL11A	335
cg02379684_LARP1	333
cg16130238_cg16130238_NA	333
cg08296263_KIF13B	333
cg01612883_NCOR2	333
cg10710218_ACOT11	333
cg26750548_LDB3	332
cg16045897_FHOD3	332
cg07207669_EFNA1,SLC50A1,DPM3	332
cg17411031_ATP11A	331
cg17760049_FOXK1	331
cg22599150_PERM1,PLEKHN1	331
cg18038269_TYK2	331
cg02711479_LSM10,STK40	330
cg22955595_SLC12A7	330
cg00207939_cg00207939_NA	330
cg15616400_SLC25A34,PLEKHM2	329
cg08258719_FBLIM1	329
ENSG00000113721_PDGFRB	329
cg12535090_NAV2,NAV2-AS2	328
cg25333460_DGKD	328
cg24925945_NAV2-AS2,NAV2	327
cg05522415_QARS,USP19,QRICH1	327
cg01227084_SGTA	327
cg09861583_RAMP1	327
cg25369185_DUSP15,FOXS1	326
cg09050160_SLC12A7	325
cg01022667_FRMD5	325
cg10859358_TTN	325
cg14168269_cg14168269_NA	325
cg02059849_PTP4A3,MROH5	325
cg25861660_JAZF1	325
cg05561696_PFKP	325
cg21631754_MARK4,EXOC3L2	324
cg08708629_PDE4DIP	324
cg10980293_ASB10	324
cg01125531_EEF1A2	324
ENSG00000034152_MAP2K3	324
cg26621780_cg26621780_NA	323
ENSG00000100345_MYH9	323
cg02964434_KLF13	322
cg03106717_CLIC4	322
cg16548605_SLC19A2	322
cg03329019_HLX	321
cg12189255_EXT2	321
cg22025263_SLC2A1-AS1,SLC2A1	321
cg26515926_HIPK2	320
cg21652260_SGCA,HILS1	320
cg26628496_PPP1R3B	320
cg19140928_cg19140928_NA	320
cg05460716_GPA33,DUSP27	320
cg10564464_MGAT5	320
ENSG00000180730_SHISA2	320
cg13645954_ASB10	319
cg12563372_EBF2	319
cg08969102_CDKL3,PPP2CA	319
cg22111442_PUM1	319
cg02311193_HOXB4,HOXB3	318
cg13995599_ATP11A	318
cg07097876_THSD4,CT62	318
cg12587213_cg12587213_NA	317
cg05185146_ATP11A	317
cg19643097_PACS2	317
cg04569594_SNX4	317
cg10529613_STXBP6	317
cg16204414_LINC00852,GHRL,GHRLOS,SEC13,TATDN2	317
cg10145246_TBX15	316
cg04006133_HSDL1,DNAAF1	316
cg02108731_ALG12	316
cg21089584_JARID2	316
cg12493107_GZF1,NXT1,LINC01431	316
cg10123201_MYL3	316
ENSG00000205978_NYNRIN	316
cg00428636_PSD3	315
cg21479519_DAZAP1	315
cg11870561_cg11870561_NA	315
cg25319237_MTUS2,MTUS2-AS1	315
cg10615580_BAIAP2-AS1,BAIAP2	315
cg24118547_ZHX2	315
cg01815090_MB	314
cg13428086_CASZ1	314
cg00713972_KLHL38	314
cg08842032_EPN3,MYCBPAP,SPATA20	314
cg01771850_TBCD	314
cg15963913_PPP1R13B,ZFYVE21	314
cg21787249_XIRP1	314
cg00465073_MAPK4	314
cg13481840_WNK2	313
cg19246197_USP2	313
cg26270038_MYH7,MIR208B,MYH6	313
cg17135459_SYNJ2	312
cg25618424_LINC00982,PRDM16	312
cg27041619_cg27041619_NA	312
cg19149915_SCD5	312
cg13077784_NAV1	312
cg26808687_RNPEP,ELF3	311
cg09844094_cg09844094_NA	311
cg24531396_MB	311
cg12883767_ARHGEF25,B4GALNT1,SLC26A10,DTX3	311
cg00341191_FAM53B	311
cg19694465_RNF207,RPL22	311
cg00147850_PDE4DIP	311
cg16676676_OBSCN	310
cg15952840_cg15952840_NA	310
cg05105646_PTP4A3,MROH5	310
cg16540134_SYNE2,ESR2	310
cg14597586_KLHL30,ESPNL	310
cg06351981_SPEG	310
cg11479568_ANK1	310
cg23343291_ADSSL1,INF2	310
cg26261563_ACOX3	310
cg04652496_RCAN2	310
cg17183215_SKI	310
ENSG00000276975_HYDIN2	310
cg03044444_ATP11A	309
cg22423984_EPB41L1	309
cg12789884_cg12789884_NA	309
cg25440131_ATP11A	309
cg00385761_WNT9A	309
cg26743588_LDB3,OPN4	309
cg00869989_SGTA	308
cg10037579_PRKAG2	308
cg04466022_MDGA1	308
cg04095826_PGBD5	308
cg02975463_cg02975463_NA	308
cg08589214_CAPN10-AS1,CAPN10,GPR35	308
cg01185754_F3	308
cg21169762_STON2	307
cg18365406_PLPPR2,CCDC159	307
cg19120580_MIR4701,ADCY6	307
cg05023214_AGO2	307
cg21531685_PDZRN3-AS1,PDZRN3	307
cg27156542_MTA1,CRIP2	307
cg27370759_ALDOC,PIGS,SPAG5	307
cg27563027_CASZ1	307
cg05762616_BNIP3	306
cg07654843_MYO18B	306
cg26498574_LDB3,OPN4	306
cg16397638_OBSCN	306
cg00835249_cg00835249_NA	305
cg20505728_cg20505728_NA	305
cg13884376_SH2D3C,TOR2A	305
cg22637428_MYBPC3	305
cg17291157_KCNQ1	305
cg04231636_KDM1B	305
cg04438997_SOX9-AS1,SOX9	305
cg09293718_cg09293718_NA	305
cg26247373_R3HDM2	305
cg14464401_KIF1A	305
cg05771459_PDE4DIP	304
cg10354134_MYBPC3,SPI1	304
ENSG00000117834_SLC5A9	304
cg10594510_SLC12A7	303
cg00460457_L3MBTL2,CHADL,RANGAP1	303
cg06733881_TSPAN18	303
cg15438211_STRA13,ASPSCR1	303
cg21708867_DCUN1D2,TMCO3,DCUN1D2-AS	303
cg00543073_BCL11A	302
cg15302350_LRP5	302
cg11287400_MITF	302
cg14226702_DMRT2	302
cg05620676_DOK7	302
cg24656517_APBB2	302
cg18361425_RAMP1	302
cg07815491_SUN1	302
cg14284050_MYH7,MIR208B,MYH6	301
cg14063129_PACS2	301
cg22168512_MBP	300
cg05508408_DCUN1D2,DCUN1D2-AS,TMCO3	300
cg15725639_DHX34	300
cg21487363_FOXP1	300
cg14801518_SENCR,FLI1	300
cg03890628_TMEM201	300
cg12840850_ZBTB46	300
cg02143988_cg02143988_NA	299
cg12819431_cg12819431_NA	299
cg25021709_cg25021709_NA	299
cg13609053_WNK2	299
cg27096043_ATP11A	299
ENSG00000227218_AL157935.1	299
cg13699650_cg13699650_NA	298
cg26259363_DES	298
cg25574691_XIRP1	298
cg16430365_FOXC2	298
cg11785240_HDAC4	298
cg19730691_TBX15	298
cg27618305_PKD1L1,HUS1	298
cg22526990_CEBPA-AS1	298
cg05190718_CASQ2	297
cg10548254_TUBGCP6	297
cg16382314_SKI	297
cg01975786_PTP4A3	297
cg17137063_PLEKHG5	297
cg17456675_MIB2,MMP23B	297
cg27450867_CENPM	296
cg00730832_FGFR2	296
cg10132917_AQP1	296
cg16498741_SFRP1	296
cg18638769_PACS2,BRF1	296
cg25504868_MIR210HG,LMNTD2,PHRF1,RASSF7	296
cg14043774_MB	296
cg14615559_LCN2	295
cg18512352_MTCH2	295
cg11486295_GJA1	295
cg02983759_cg02983759_NA	295
ENSG00000183421_RIPK4	295
cg19712123_MAP10	294
cg14279151_EFHC1,TRAM2	294
cg19369151_CRTC1	294
cg23586423_OBSCN	294
cg23088184_LTBP4	294
cg04905644_KIF13B	294
cg19182986_NRGN,VSIG2,ESAM	294
cg13909178_FLI1,SENCR	294
cg14129589_TSPAN9	294
cg24617171_cg24617171_NA	293
cg09951201_SLC12A7	293
cg10517919_cg10517919_NA	293
cg21621104_LRIG1	293
cg03328754_A4GALT	292
cg12599275_PRDM16	292
cg04180113_LARP4B	292
cg20902353_ASB2	292
cg00407393_SYNJ2	292
cg24793584_FOXK2	292
cg01577760_ALDH3B1,UNC93B1	292
cg03793055_BCAR1	292
cg14465344_LRRC14B,PLEKHG4B,CCDC127	291
cg13956700_MYO18A	291
cg07354565_cg07354565_NA	291
cg10928426_PRRT4	291
cg03970032_SLC25A34,PLEKHM2	291
cg01712700_CAPN10,CAPN10-AS1,GPR35	291
cg10731281_MYH7	291
cg15983520_GPT,PPP1R16A,RECQL4,MFSD3	291
cg00351750_SMYD3	290
cg01318461_VPS13D,SNORA59A	290
cg19174554_DIAPH3	290
cg25013053_UNC45B,NLE1	290
cg09375377_ATP11A	290
cg22376805_PROX1	290
cg14780255_NAV1	290
cg23801748_KCNQ1	290
cg01037895_ALPL	290
cg02881369_MB	290
cg08125574_SLC25A4	289
cg06292124_GRASP,NR4A1	289
cg04774043_SFXN2,WBP1L	289
cg10696504_cg10696504_NA	289
cg24377826_FAM53B	289
cg21596862_ATP2A2	289
cg22130673_ZBTB16	289
ENSG00000067113_PLPP1	289
cg01961825_SLC45A4	288
cg20978460_IQCE	288
cg07586345_SGTA	288
cg11943820_ITPRIP	288
cg15161225_MB	288
cg18500988_FIP1L1	288
cg05119686_cg05119686_NA	287
cg26811852_HNRNPH1	287
cg24380053_IQSEC1	287
cg08049745_ABLIM2	287
cg23731781_PEAR1	287
cg03389164_ASB2,MIR4506	287
cg12761421_LGR6	287
cg09790628_SLC12A7	286
cg08756640_cg08756640_NA	286
cg13726463_COX6A2,ZNF843,ITGAD	286
cg05290572_NEDD4L	286
cg12581691_RAI1	286
cg08909592_OSBPL2	286
cg25152584_cg25152584_NA	286
cg13726166_TIAF1,MYO18A	286
cg16201273_ZMIZ1	286
cg13413384_RXRA	285
cg05170132_MYLK3	285
cg15415259_TARID	285
cg24141516_MAPKAPK2	285
cg25118167_cg25118167_NA	285
cg19951818_FYCO1	285
cg04099095_cg04099095_NA	285
cg16124920_PTDSS2	285
cg12777520_LMX1B	285
cg02049955_SCN2B	285
cg05813616_MYLK3	285
cg06464468_PCNX3,SIPA1,RELA	285
cg18004338_SMCO1	285
cg01058902_NAV1	284
cg02586712_EHD4	284
cg01197294_MYL2	284
cg13452658_KCNN3	284
cg26517646_cg26517646_NA	284
cg07394491_SPG7	284
cg14339867_DCUN1D2,ADPRHL1	284
cg16667710_SLC25A4	284
cg13492291_ANKLE2	283
cg06483978_ASPSCR1,STRA13	283
cg00226984_KLHL30,ESPNL	283
cg02393617_NAV2	283
cg00571354_KCNH2	283
cg22486630_PLPPR2,CCDC159	282
cg08936706_MYL3	282
cg19383853_TUBA3D,MZT2A	282
cg03260530_METRNL	282
cg17479060_B3GNTL1	282
cg23533926_MYL2	282
ENSG00000103549_RNF40	282
cg08924619_COL4A2-AS1,COL4A2	281
cg07247998_TACC2	281
cg11047500_FOXN3	281
cg02709907_SMYD2	281
cg07723431_MKNK2,BTBD2	281
cg18301797_LYRM4	281
cg14450427_PRRC2B	281
cg05753046_NDUFS8,ALDH3B1,TCIRG1	281
cg01919204_GPT,PPP1R16A,MFSD3,RECQL4	281
cg05679108_FOXF2	281
cg01431482_LINC00982,PRDM16	280
cg06118122_LGALS8,LGALS8-AS1	280
cg25023215_CRIP2,MTA1	280
cg04790755_CYHR1,KIFC2	280
cg14567877_ADCY5	280
cg27182923_ADCY5	280
cg08380064_ZC3H3	280
cg26213438_SLC12A7	279
cg03044452_MYBBP1A	279
cg05973317_PTP4A3,MROH5	279
cg00914726_cg00914726_NA	279
cg01335127_PXYLP1	279
cg24140574_HSPB7,C1orf64,CLCNKA	279
cg25741120_KCNQ1	279
cg18239942_PACS2	279
cg16101118_SLC45A4	279
cg13738327_LRP5	279
cg13707760_WNK2	279
ENSG00000071246_VASH1	279
cg06588876_C9orf69	278
cg27650699_ATP8A2	278
cg05163330_DCUN1D2,ADPRHL1	278
cg19306970_HLX	278
cg04350136_cg04350136_NA	278
cg19437852_U2AF2,EPN1	278
cg05726109_SEPT5	278
cg13875506_PLEKHA7	278
cg16839815_XIRP1	278
cg14601621_MIR27B,MIR23B,C9orf3	278
cg20467114_TSPAN9	278
cg18406255_GTDC1	278
cg20166027_cg20166027_NA	278
cg04398180_DCUN1D2,ADPRHL1	277
cg15393774_PITPNA	277
cg23588952_MYOM2	277
cg03023681_FBXO32	277
cg27028514_DAPK3	277
cg01945840_MB	276
cg10376838_RBPJ	276
cg12713040_DNAJC5,UCKL1	276
cg12301921_cg12301921_NA	276
cg06198069_NNAT,BLCAP	276
cg25230917_LRIG1	276
cg16404170_FAM53B	276
cg26477613_cg26477613_NA	276
cg15681229_ZC3H3	276
cg07565018_PKM	276
ENSG00000170921_TANC2	276
cg07925867_CDH16,RRAD	275
cg02268620_C9orf3,MIR27B,MIR23B	275
cg23167235_LINC00511	275
cg09664216_MIR4269,HDAC4	275
cg05006092_SYNGR2,TK1	275
cg21441211_CDC42EP4	275
cg03450107_HIVEP3	275
cg25618916_CASZ1	275
cg23595055_GPA33,DUSP27	275
cg03728296_ARHGEF25,B4GALNT1,DTX3,SLC26A10	275
cg03459415_cg03459415_NA	275
cg10092867_OGFR,COL9A3	275
cg13985639_ANKRD2,HOGA1,C10orf62,PI4K2A	275
cg21176875_MYH7,MIR208B	275
cg23594208_LAD1,TNNT2	274
cg20325921_GPR20	274
cg23933289_FAM20B	274
cg14476479_GPT,PPP1R16A,MFSD3,RECQL4	274
cg07681935_HAND2-AS1,HAND2	274
cg08756008_BAG3	274
cg26076683_AIG1	274
cg14030388_MYH7,MIR208B	273
cg13630878_FAN1	273
cg18555289_GPT,PPP1R16A,RECQL4,MFSD3	273
cg13552373_cg13552373_NA	273
cg05978154_SLC12A7	273
cg16878214_PLEKHF2	273
cg08026852_RFX1	273
cg11002258_cg11002258_NA	273
cg21465231_SORBS2	273
cg12393623_METRNL	273
cg07387634_F3	273
cg17411035_ASB18	273
cg26738080_TNNC1,SEMA3G,NISCH	273
cg05132828_PITPNM2	273
cg15318176_PTPRN2	273
cg25059588_DES	273
cg19673484_NAV2	273
cg22530462_RYR2	273
cg23220897_PLCL2	272
cg06343686_ESPNL,KLHL30	272
cg07583690_ATP11A	272
cg18496271_GAMT,NDUFS7	272
cg16362481_LIMS2,GPR17	272
cg08464505_ATP11A	272
cg17297354_MTR	272
cg19975346_FAM53B	272
cg01565314_EXOC3L2,MARK4	272
cg21966860_HSF1	272
cg09657673_TNRC6A	272
cg17232991_ACOX3	272
cg09660894_TRIO	271
cg05791946_PRDM16	271
cg25655333_SLC12A7	271
cg03746851_cg03746851_NA	271
cg20808693_SMARCD3	271
cg12226735_DCBLD2	271
cg01233968_DIP2C	271
cg12817352_METRNL	271
cg03256938_LINC00982,PRDM16	270
cg21238257_DCUN1D2,TMCO3,DCUN1D2-AS	270
cg16617758_KDM4B	270
cg26548718_DMPK,DMWD	270
ENSG00000130816_DNMT1	270
cg04735123_MYL2	269
cg02756735_DNAAF5	269
cg19185706_LDB3	269
cg05592769_KCNJ4	269
cg12187687_cg12187687_NA	269
cg27490101_DCUN1D2,ADPRHL1	269
cg01865114_SLC38A8	269
cg05056133_SLC4A3	269
ENSG00000160218_TRAPPC10	269
cg19825437_MECOM	269
cg05138702_CTBP2	268
cg26758340_SLC38A7	268
cg19148404_SLC6A6	268
cg18594033_RBM20	268
cg05425326_GINS3	268
cg16230060_CKMT2,CKMT2-AS1,RASGRF2	268
cg10575369_ADGRB2	268
cg26105766_SAMD8,DUSP13	268
cg09354263_SMIM5,MYO15B,RECQL5	268
cg12831076_ST3GAL1	268
cg26958741_MYL2	267
cg12407685_RREB1	267
cg14718247_PSMA2,MRPL32	267
cg24610044_cg24610044_NA	267
cg13595495_RXRA	267
cg15763258_FLI1,SENCR	267
cg07018980_GAK	266
cg09533305_KCNJ4	266
cg27051260_FAM180B,C1QTNF4	266
cg07112556_OBFC1	266
cg18599955_VPS39,PLA2G4F	266
cg12524640_LINC00982,PRDM16	266
cg15318546_FBRSL1	266
cg14229207_GTF3C5,CEL	266
cg04800569_RPL28	266
cg03392571_FAM207A,LINC01547	266
cg26350373_PLA2G4F,VPS39	266
cg06748434_EOMES	266
cg09635738_cg09635738_NA	266
cg21308322_ACOX3	266
cg14263924_SLC39A7	265
cg03515246_MBTPS1,SLC38A8	265
cg03023237_CDH16,RRAD	265
cg25647089_ATP11A	265
cg17711754_KCND3	265
cg14517390_ACSBG1,IDH3A	265
cg09287356_METTL21EP,ERCC5	265
cg11829633_PPP1R13B	265
cg20252015_PGM1	265
cg24921186_ANXA2R	265
cg11386711_ST6GAL1	265
cg02021485_PACS1	265
ENSG00000164574_GALNT10	265
cg02953559_ADCY5	264
cg01102073_GATA2-AS1,GATA2	264
cg02132604_LRP5	264
cg14074251_DES,SPEG	264
cg24943002_DAPK3	264
cg20028019_cg20028019_NA	264
cg18222913_TMEM132C	264
cg13527735_FILIP1L,CMSS1	264
cg04994481_SPTB	264
cg00578637_SMYD1	264
ENSG00000198053_SIRPA	264
cg02909176_ATP11A	263
cg17272094_LSMEM2	263
cg21167817_PRDM16	263
cg19441908_ANK1	263
cg02492708_RPL3L,NDUFB10,SNHG9,RPS2	263
cg16458436_TBX5-AS1,TBX5	263
cg22825529_EAF1-AS1,EAF1,METTL6	263
cg16627346_KCNIP3	263
cg14384014_cg14384014_NA	263
cg11614198_MYBPC3	262
cg05495478_cg05495478_NA	262
cg06729381_SYT7	262
cg14587704_ST3GAL1	262
cg25013838_MYO18B	262
cg15772157_cg15772157_NA	262
cg06761167_cg06761167_NA	262
cg04347708_SENCR,FLI1	262
cg22285438_TIMM22,ABR	262
cg01554357_PBX1	262
cg00252594_ANKRD9,TECPR2	261
cg10843210_TNK2	261
cg11535638_TACC2	261
cg08110058_PRDM16	261
cg23058194_KBTBD13,RASL12	261
cg11972564_TSPAN18	261
cg09012125_KCNJ5,C11orf45	261
cg01388243_KLHL38	261
cg01454148_ACADVL,PHF23,DLG4,MIR324,DVL2	261
cg14051662_RXRA	261
cg21173317_ATAD3A,TMEM240,SSU72	261
cg22868951_JADE1	261
cg25002294_OBSCN	261
cg01107874_ZNF503,ZNF503-AS2	261
cg05314639_DCUN1D2,ADPRHL1	260
cg02557110_SLC12A7	260
cg04206724_CIITA,DEXI	260
cg06477069_SOGA1	260
cg23614000_MYBPC3,MADD	260
cg01818579_RBM38	260
cg18315623_ATP11A	260
cg12547516_ECHDC2	260
cg17463698_FSD2,WHAMM	260
cg06415550_PTDSS2	260
cg22122342_cg22122342_NA	260
cg16764147_SCN5A	260
cg17169397_PDE1C	260
cg25911123_MRPS23,CUEDC1	260
cg13991728_SYNPO	260
cg20708856_ATP11A	259
cg20208394_TADA2B,GRPEL1,CCDC96	259
cg02100918_CPT1A	259
cg12194594_ATP11A	259
cg09265054_GPT,PPP1R16A,MFSD3,RECQL4	259
cg16226106_C20orf166-AS1	259
cg19437325_CELSR1	259
cg22958315_SOS1	259
cg22446208_KIAA1841	259
ENSG00000123384_LRP1	259
ENSG00000090863_GLG1	259
cg19628619_DPM3,EFNA1,SLC50A1	258
cg22984256_GPSM1	258
cg10893908_LRP5	258
cg08619669_GYS1,RUVBL2	258
cg07610853_ATP11A	258
cg02363526_KCNH2	258
cg16326421_BLCAP,NNAT	258
cg12079266_NEDD4L	258
cg14312114_FOXK2,WDR45B	258
cg12303582_PFKP	258
cg11787160_DTX1	258
cg13922494_EFNA5	258
cg26709929_KCNQ1	257
cg08326019_PLPPR2,CCDC159	257
cg27372015_GTF3C1	257
cg11269166_METTL8	257
cg05756918_cg05756918_NA	257
cg27266381_PTP4A3,MROH5	257
cg02630854_cg02630854_NA	257
cg05364747_OBSCN	257
cg17123639_WNT5B	257
cg20193802_SEPT5	257
cg03118430_KCNQ1	257
cg15685971_GPT,PPP1R16A,MFSD3,RECQL4	257
cg18692273_LAD1,TNNT2	257
cg13898697_MAP7D1	257
cg26312133_SDK2	257
cg01120851_KLHL21,ZBTB48	257
cg15112006_cg15112006_NA	257
cg01207684_ADCY9	257
cg26919014_MMP15,USB1	256
cg06786860_C1orf115	256
cg14773694_cg14773694_NA	256
cg11248999_EPHB2	256
cg02201239_B3GAT1	256
cg02044879_PLA2G12B	256
cg08321382_cg08321382_NA	256
cg23095812_MB	256
cg00601711_SLC12A7	256
cg12452909_ACVR2B	256
cg07555787_PPP1R12C	256
cg05229035_TECPR2,ANKRD9	256
cg24249973_LAD1,TNNT2	256
cg23820560_MYO18B	256
cg12716639_USP2	256
cg10335931_MYBPC3,SPI1	256
cg02910037_ADCY9	255
cg26328757_RNPEP,ELF3	255
cg13298691_KCNQ1	255
cg05760882_LRRC14B,PLEKHG4B,CCDC127	255
cg04570540_ATP11A	255
cg26015134_WNT5B	255
cg03770548_CDH24,ACIN1	255
cg23939866_LARP1	255
cg03251857_PLPP7	255
cg07892374_ATP2C1	255
cg03310087_IGF1R	255
cg01439248_MYOM2	255
cg24618387_cg24618387_NA	254
cg03534948_TSPAN9	254
cg06015060_LNX1,FIP1L1	254
cg23889772_COL5A3	254
cg08085909_FERMT2	254
cg01900030_CDK6	254
cg21727276_DBNDD2,TP53TG5,PIGT	254
cg00496629_IQCE	254
cg06501744_cg06501744_NA	254
cg05380885_NMNAT2	254
cg18836576_UQCC2	254
cg03226872_NNAT,BLCAP	254
cg22550003_PIN4P1,FRMD5,WDR76	254
cg02002164_CSRP3	254
cg00577847_cg00577847_NA	254
cg20805407_PEAR1	254
cg19677302_PKP2	254
cg22008075_cg22008075_NA	254
cg02527190_SLC27A6	254
cg01561200_EVI5	253
cg25949033_PFKP	253
cg03791861_RAI1	253
cg06722630_cg06722630_NA	253
cg20462242_PRDM16	253
cg00466334_TBX15	253
cg09430827_RBM17	253
cg20845835_ESRRG	253
cg03001143_METTL11B	253
cg05919907_HRH2	253
cg05163933_SLC12A7	253
cg15990629_BCAT1	252
cg10134651_WIZ,AKAP8L	252
cg01567754_TECPR2,ANKRD9	252
cg05843596_RHOF,TMEM120B	252
cg20178924_ANKRD1	252
cg04622454_PNPLA7,NSMF	252
cg22215392_IQSEC1	252
cg14107328_cg14107328_NA	252
cg10078335_CAPN10-AS1,GPR35,CAPN10	252
cg09830575_THSD4	252
cg21271420_cg21271420_NA	252
cg14021961_HSPB7,CLCNKA	252
cg15693248_LRRC10,CCT2	252
cg08133476_DCUN1D2,ADPRHL1	252
cg24928433_SLC12A7	251
cg00528616_ZNRF1,WDR59	251
cg05048523_OBSCN	251
cg11427463_BSG	251
cg20127102_SLC43A3	251
cg02242345_CDH16,PDP2	251
cg01535205_LINC00881	251
cg22586324_LMOD2	251
cg05196076_cg05196076_NA	251
cg24125828_cg24125828_NA	251
cg10061384_PANK4,HES5	251
cg17665357_MYOM2	251
cg07494691_SAMM50,PARVB	251
cg23170535_cg23170535_NA	251
cg06799721_TARS	251
cg14436861_WEE1	251
cg21945949_LGALSL	250
cg08876518_CMIP	250
cg16958939_RREB1	250
cg13357821_CUX1	250
cg20539175_TMCO3	250
cg15007222_DMWD,DMPK	250
cg25381229_KCNMA1	250
cg00114346_DNAJB6	250
cg15698107_PPTC7	250
cg14176989_ADAM33	250
cg26877508_THSD4	250
cg10041950_DIP2C	250
cg15648239_USP2,USP2-AS1	250
cg21339084_LIMS2	249
cg04761094_LIPE-AS1,LIPE	249
cg23801168_NAV1	249
cg22620111_cg22620111_NA	249
cg07717588_SH3BP4	249
cg05455680_SAMM50,PARVB	249
cg11511084_ASPSCR1	249
cg11407989_MAGI2	249
cg25133951_cg25133951_NA	249
cg02646064_GCK,MYL7	249
cg00002426_SLMAP	249
cg09723488_LHX6	249
cg11542394_ALDH1A3	249
cg15090161_TENM2	249
cg19528963_LPP	249
cg11028052_CEMIP	249
cg06276229_NAA60	248
cg21812476_GLIS1	248
cg14671982_SLC12A7	248
cg15639951_MAP3K14	248
cg06724693_PRDM16	248
cg10772322_SPHK2,RPL18	248
cg10383424_cg10383424_NA	248
cg00087971_PAQR8	248
cg04369588_TECPR2,ANKRD9	248
cg22504528_HMGB1P10,TPST2	248
cg26504274_KCNQ1	248
cg05685483_ASB18	248
cg10140126_AFF3	248
cg14103123_RALGDS	248
cg13855279_SERGEF	248
cg22250605_P3H2	248
cg23796578_DHRS7C	248
cg11249762_SEPT9	247
cg09982918_MYO18B	247
cg03542938_SOX18,LINC00176,TCEA2,ZNF512B	247
cg17285709_SPEG,DES	247
cg15026743_F3	247
cg17986341_TP73,TP73-AS1	247
cg26519342_PPP4C,ALDOA	247
cg09121047_LINC01140	247
cg06796779_GATA2-AS1,GATA2	247
cg16700555_UQCRFS1	247
cg15520962_RPL28	247
ENSG00000166341_DCHS1	247
cg22872064_PSD3	246
cg10774480_LRP5	246
cg06444025_CHRNE,C17orf107,MINK1	246
cg03535099_TBCD	246
cg17841545_NRAP	246
cg09393494_KCNQ1	246
cg23208717_ZNF775	246
cg15010213_C20orf166-AS1	246
cg09926728_SH3PXD2A	246
cg16041090_cg16041090_NA	246
cg21695727_ZNF592	246
cg00188627_IQCJ-SCHIP1,SCHIP1	246
cg22444512_NDUFS6,MRPL36	246
cg05375699_PRDM16	245
cg09763086_MYL2	245
cg17846127_MIR9-3HG	245
cg20482280_MTA1,CRIP2	245
cg13754877_cg13754877_NA	245
cg02671204_SLC38A8	245
cg08051105_DGKD	245
cg09837648_CCDC51,PLXNB1	245
cg13906792_MPI,FAM219B	245
cg10626556_TTI1	245
cg12393275_cg12393275_NA	245
ENSG00000244675_AC108676.1	245
cg06852032_LGALS9	244
cg25566714_MUM1	244
cg21767191_PLCL2,PLCL2-AS1	244
cg12479878_HLX	244
cg18868146_ESRRG	244
cg06646622_HOMER1	244
cg08924696_RTN4RL2	244
cg26070379_TMEM201	244
cg14895576_WDR45B,FOXK2	244
cg23790567_MB	244
cg22697045_MYBPC3,MADD	243
cg07527324_C14orf159	243
cg23286173_PTP4A3,MROH5	243
cg02372786_cg02372786_NA	243
cg26081974_cg26081974_NA	243
cg16111231_IGF2R	243
cg19506433_NKX2-5	243
cg17432748_SH3BP4	243
cg15845118_SIX2	243
cg24989193_SH3PXD2A	243
cg12741293_cg12741293_NA	243
cg10536955_RTN4,EML6	243
cg13573358_cg13573358_NA	243
cg13048209_TBL1XR1	243
cg22512256_SH3TC1	242
cg21390574_SEMA5B	242
cg16986578_ELF3,RNPEP	242
cg18720506_ZNF827	242
cg05266497_PGBD5	242
cg24836748_TNNT2	242
cg14583686_LRSAM1	242
cg27301475_SSU72,TMEM240,ATAD3A	242
cg19700658_C2CD3,UCP3	242
cg10805039_NXN	242
cg05671018_LYSMD2	242
cg08506654_cg08506654_NA	242
cg08543327_SLC12A7	241
cg04040861_ZC3H3	241
cg18232828_CASZ1	241
cg03534504_STK10	241
cg03827720_PLCZ1	241
cg01878019_CAMSAP2	241
cg04237288_SULF1	241
cg06115614_GATA2-AS1,GATA2	241
cg16002136_METRNL	241
cg22996718_MYO18B	241
cg17543218_SHROOM3	241
cg16941122_GPR183,UBAC2	241
cg12653626_cg12653626_NA	241
cg00142933_LIMS2	241
cg08124721_TSPAN9	240
cg13587564_WDR5	240
cg04488145_MYL3	240
cg02382320_SLC12A7	240
cg11276172_ITPRIP	240
cg09853570_OBSCN,C1orf145	240
cg01145653_SLC41A3	240
cg01064903_TIMM44	240
cg11805188_SLC12A7	240
cg18366169_cg18366169_NA	240
cg18041960_GRAMD1B	240
cg06470251_TAF4	240
cg24455148_FAM229B	240
cg03803102_ZNF778	240
cg26215113_DGKD	240
cg12509665_GRAMD4,CERK	239
cg02349468_SLC12A7	239
cg03245889_PDXDC1,NTAN1	239
cg17267710_cg17267710_NA	239
cg26427777_ZHX2	239
cg12241599_MEIS2	239
cg02622133_cg02622133_NA	239
cg18549688_cg18549688_NA	239
cg26751372_UNC45B,NLE1	239
cg10829227_PRKD2	239
cg04055913_FRMD5,PIN4P1	239
cg16483611_PXMP2,PGAM5,ANKLE2	239
cg17781866_ACOX3	239
cg19687152_TECPR2,ANKRD9	239
cg20151107_FAM53B	239
cg16448462_cg16448462_NA	239
cg23462152_GPR68	238
cg04805065_RAI1,SREBF1	238
cg21220387_CASQ2	238
cg23387597_ITPRIP	238
cg19632953_MCF2L	238
cg17868307_EIF4H	238
cg26968025_PRKCA	238
cg10347246_MAP2K3	238
cg22846388_cg22846388_NA	238
cg07817892_RER1,PEX10	238
cg19216994_PNPLA2,RPLP2,PIDD1	238
cg18824724_SORBS2	238
cg11297046_HRC,TRPM4,PPFIA3	238
cg06084210_cg06084210_NA	238
cg18119485_OSBPL9	238
cg12229632_CLUH	238
cg04138198_ACTN2	238
cg17105139_LBX2-AS1,LBX2,PCGF1,TTC31	238
cg05828497_HAND2,HAND2-AS1	238
cg05158165_FOXO3	238
cg05653018_ELF3,RNPEP	238
cg05794310_VAC14	238
cg20282814_SLC2A1-AS1,SLC2A1	238
cg04675946_cg04675946_NA	238
cg00130530_FKBP5	238
cg08811581_PLEKHA7	238
cg16677112_EFNA1,DPM3,SLC50A1	237
cg11132582_POU2F1	237
cg05021029_SAMD8	237
cg06626556_ULK4,CTNNB1	237
cg00319334_CD81-AS1,CD81	237
cg12398448_IGF1R	237
cg24538396_COMMD1	237
cg02433807_CLEC16A	237
cg09147846_PACSIN3,ARFGAP2	237
cg14214797_CCDC88C	237
cg02095498_GPR20	237
cg23482898_CAND2	237
cg10856812_TESC	237
cg21222350_cg21222350_NA	237
cg05585263_SNORD116-24,SNHG14	237
cg10547761_C20orf196	237
cg20053110_MDGA1	237
cg26122413_ADSSL1,INF2	237
cg19864271_VPS4B	237
cg01033419_DST	236
cg23065561_USP46,USP46-AS1	236
cg14141238_SARDH	236
cg04551925_AQP1	236
cg10823804_TINAGL1	236
cg25067242_NGF	236
cg14305801_cg14305801_NA	236
cg23622047_RAPGEF4	236
cg14338936_SSH2	236
cg14346202_REC114	236
cg03457302_TTLL1	236
cg23501439_DNAAF5	236
cg20926021_TRIM2	236
cg22589504_JPH2	236
cg06008571_CUL5	236
cg12005811_ADGRA3	236
cg12255554_RBM38	236
cg03564620_MIR208B,MYH7,MYH6	236
cg20739904_SRD5A1,NSUN2	235
cg22125214_MTPN	235
cg02765962_HRH2	235
cg27647852_TP53TG5,DBNDD2,PIGT	235
cg10868030_LRRC14B,PLEKHG4B,CCDC127	235
cg08713568_cg08713568_NA	235
cg16373176_RAI1	235
cg06032919_cg06032919_NA	235
cg15805423_ATP11A	235
cg10494257_HSPB7,C1orf64,CLCNKA	235
cg16774290_AP5Z1	235
cg21716282_KBTBD12	235
cg24185680_DNAJB6	235
cg15439078_MYL3	235
cg11831419_LMO7	235
ENSG00000151693_ASAP2	235
cg10621552_SYNJ2	235
cg04566694_H6PD	234
cg27147718_NDRG4	234
cg07263393_GATA2-AS1,GATA2	234
cg08995327_cg08995327_NA	234
cg09642090_PKNOX2	234
cg19648605_C5orf45,TBC1D9B	234
cg07661965_cg07661965_NA	234
cg09766856_cg09766856_NA	234
cg16146718_HSF1	234
cg07406888_KLHL31	234
cg11382529_BHLHE22,CYP7B1	234
cg20935317_CASZ1	234
cg21170796_TBX15	234
cg20027684_GDPGP1,TTLL13P	234
cg07168060_SH3PXD2A	234
cg09128169_MFHAS1	234
cg10065739_SRL	234
cg00667048_RER1,MORN1	234
cg13428978_MYOM2	233
cg26799816_ADAM23	233
cg27639104_KCNQ1	233
cg10653297_STARD7-AS1,TMEM127	233
cg00128812_cg00128812_NA	233
cg04211309_USB1,MMP15	233
cg15980707_ATP11A	233
cg13452923_SMCO1	233
cg24602369_PDZRN3	233
cg12051956_PIANP,ZNF384	233
cg10465696_ROBO4	233
cg10336935_RBM38	233
cg12866104_CAST	233
cg12676534_DUSP15,TTLL9	232
cg25372239_PRDM16	232
cg09176194_CLUH	232
cg22082350_cg22082350_NA	232
cg19326543_LIMS2	232
cg24353217_MYL2	232
cg09041644_cg09041644_NA	232
cg16386950_NAV1	232
cg21532103_LRRFIP1	232
cg23669504_SUN1	232
cg08078751_cg08078751_NA	232
cg07366462_ADCY5	232
cg26795340_COX14,GPD1	232
cg09448616_cg09448616_NA	232
cg26240939_LYRM1,DCUN1D3,ERI2	232
cg23242489_GPR146,C7orf50	232
cg01831160_IQSEC1	232
cg23792592_C20orf166-AS1	232
cg00866541_cg00866541_NA	231
cg01266985_SLC12A7	231
cg11065036_cg11065036_NA	231
cg23787873_SEPT5	231
cg14355374_cg14355374_NA	231
cg16408049_KLHL38	231
cg20359413_LSMEM2	231
cg11422312_SLC12A7	231
cg00386586_cg00386586_NA	231
cg01881549_SH3BP4	231
cg22913585_BSG	231
cg13729147_cg13729147_NA	231
cg01721544_MEIS1	231
cg03816851_MICAL3	231
cg13241681_TMCO3	231
cg22416376_SLC7A2	231
cg21843902_WBP2,UNC13D	231
ENSG00000006756_ARSD	231
cg00328284_ANK1	230
cg05649906_TRIO	230
cg13479146_PUM1	230
cg02181220_DES	230
cg11024506_RHOBTB1	230
cg26289317_LPL	230
cg00169111_MAP7D1	230
cg23222617_FOXN3	230
cg26863172_ANKRD65,VWA1	230
cg15212821_PARVB,SAMM50	230
cg06168166_MYBPC3,SPI1	230
cg00847221_cg00847221_NA	230
cg24523948_MSC-AS1	230
cg12399484_IQSEC1	230
cg21334510_SLC12A7	230
cg27137836_SLC41A3	230
cg16532185_RYR2	230
cg21227619_TSPAN9	230
cg20837354_CACNA1C,CACNA1C-IT3	229
cg14859088_PACSIN2	229
cg14054357_CLUH	229
cg13576946_C20orf166-AS1	229
cg19939250_ITPRIP	229
cg16145071_TBC1D8	229
cg18501647_cg18501647_NA	229
cg24188163_IDO1	229
cg19403029_SOX7	229
cg26779330_TOLLIP	229
cg21155852_MAD1L1	229
cg02775489_TJP2	229
cg17195635_ZNRF3	229
cg11621464_LTBP4	229
cg19052272_cg19052272_NA	229
cg15102070_cg15102070_NA	229
cg18701970_cg18701970_NA	229
cg02299946_HTRA1,ARMS2	229
cg19426955_LIMS2	228
cg19591623_MIER2	228
cg08905895_HAND2-AS1,HAND2	228
cg00955674_ATAD3A,TMEM240,SSU72	228
cg05867360_LARP4B	228
cg27067158_SLC2A4,YBX2	228
cg19619576_SREBF1,RAI1	228
cg19229716_cg19229716_NA	228
cg11076487_SORBS2	228
cg08794696_cg08794696_NA	228
cg13067139_GBA,SCAMP3	228
cg13206429_PTP4A3	228
cg15188939_ARIH1	228
cg10881110_SLC25A34,PLEKHM2	228
cg11867461_GLI3	227
cg06647600_HLX	227
cg17676994_GPC1	227
cg18339298_VIPR2	227
cg03347632_PGBD5	227
cg20552236_CSK	227
cg03245218_TRPC2,ART1,ART5	227
cg12284098_MYOM2	227
cg12668523_COL18A1-AS1,COL18A1	227
cg09455126_SNHG14,SNORD116-24	227
cg07279802_ZBTB47	227
cg10383568_DNHD1	227
cg15801751_MARK2	227
cg03965649_ST3GAL1	227
cg26454662_RAPSN	227
cg10766942_LCLAT1	227
cg08704660_TBC1D4	227
cg09268961_MIR193BHG	226
cg25789916_ISLR2	226
cg10633051_XIRP2	226
cg01153442_PDE3A	226
cg07746514_MLEC,UNC119B	226
cg04984818_ZFYVE21,PPP1R13B	226
cg02405662_DAZAP1,RPS15	226
cg17602903_IFI6	226
cg10055471_NUDC,NR0B2	226
cg17415859_SDK1	226
cg21252523_cg21252523_NA	226
cg18001443_CPEB4	226
cg01059818_NLK	226
cg15961092_MIS18BP1	226
cg27525636_DNAJB6	226
cg13840782_KCNQ1	226
cg25162794_ANKRD39,ANKRD23	226
cg25396637_KLHL7,KLHL7-AS1	226
cg13393505_GPC1	226
cg19823698_PLCL2,PLCL2-AS1	226
cg11571942_PPP1R12C	225
cg07222900_HDAC4	225
cg09707038_CALM2	225
cg06028975_cg06028975_NA	225
cg13461192_RHOQ	225
cg14611112_LCN6,LCN10	225
cg09216381_MFN2,PLOD1	225
cg10069666_BRI3,BAIAP2L1	225
cg18183618_TNIK	225
cg21920871_cg21920871_NA	225
cg10235116_RRP15	225
cg20195046_ORAOV1,CCND1	225
cg09671989_cg09671989_NA	225
cg07568233_RBFOX1	225
cg10575219_ATXN7L1	225
cg03378525_FBXL18	225
cg11959316_PLPP3	225
cg26508444_FAM53B	225
cg05236451_AGAP1	224
cg02052242_TSPAN9	224
cg21681320_PRDM16	224
cg09646983_ESR1	224
cg03600605_KRT8	224
cg08799655_SCUBE3	224
cg20463533_CFAP46	224
cg14741726_DOK7	224
cg17185495_CPVL,CHN2	224
cg20793665_cg20793665_NA	224
cg09274810_TNNT2,LAD1	224
cg19422300_CHRNA4	224
cg15559456_CHTOP,S100A1,S100A13	224
cg26338030_MTA1,CRIP2	224
cg10750828_CRIP2,MTA1	223
cg07145988_RERE	223
cg09643027_MAPKAPK3	223
cg12736760_IGF1R	223
cg05675527_cg05675527_NA	223
cg15882591_LATS2	223
cg13960660_MVB12B	223
cg05481579_BAIAP2	223
cg03542208_F10,PROZ	223
cg04171052_SLC7A5	223
cg03466031_cg03466031_NA	223
cg09850150_MB	223
cg22662182_cg22662182_NA	223
cg16286055_JAZF1-AS1,JAZF1	223
cg00870269_ALDH1A2,LIPC	223
cg02145310_ZMIZ1	223
cg25113462_TRAF3IP1	223
cg25282976_BAIAP2-AS1,BAIAP2	222
cg06978461_NTAN1,PDXDC1	222
cg06749819_SOD3,CCDC149	222
cg06521359_ZC3H11A,ZBED6	222
cg06481076_PAPD7	222
cg25331550_DOK7	222
cg07658280_GPT,PPP1R16A,MFSD3,RECQL4	222
cg11302791_SOX7,PINX1	222
cg22981153_PTP4A3	222
cg13866795_TTF1,CFAP77	222
cg24201033_CPT1C	222
cg14062119_cg14062119_NA	222
cg20731693_DCUN1D2,ADPRHL1	222
cg06427176_cg06427176_NA	222
cg13371777_CDKL3	222
cg15345907_SORBS2	222
cg15964612_MYL4	222
cg27413290_ZC3H3	222
cg26565054_cg26565054_NA	222
cg21500092_UBE2G1	222
cg21926603_ZHX2	222
cg25577212_DFNA5,MPP6	221
cg01679512_DCUN1D2,ADPRHL1	221
cg13827582_cg13827582_NA	221
cg01835580_NDRG2,TPPP2,RNASE7	221
cg11152167_ROR1-AS1,ROR1	221
cg11350586_SOX9-AS1,SOX9	221
cg13468772_PDZRN3	221
cg17433678_PFKP	221
cg04277574_NAV1	221
cg08040035_UQCRH,LRRC41	221
cg21814238_PDE2A	221
cg09082192_DNAAF5,PRKAR1B	221
cg04876424_RBM24	221
cg21370143_MYBPC3,SPI1	221
cg17695660_cg17695660_NA	221
cg19055098_SCN8A	220
cg24989181_PLAGL2,TSPY26P	220
cg08479629_LINC01376	220
cg06348826_LINC00982,PRDM16	220
cg01227294_PPP1R17	220
cg07039404_GJA3	220
cg08005771_KIDINS220	220
cg18697996_cg18697996_NA	220
cg26179667_CNBP	220
cg23635560_SLC30A3,CAD	220
cg20651417_NFE2L1	220
cg25446612_GPC1	220
cg24962576_HHATL,CCDC13,HHATL-AS1	220
cg20200200_KLHDC7A	220
cg08484225_THSD4	220
cg18751573_PLCL2	220
cg16749093_EHBP1L1,KCNK7	220
cg11135937_ZFHX2	220
cg00407150_HHATL,CCDC13,KLHL40,HHATL-AS1	220
cg22706157_RBPMS2	220
cg02295872_WNT9A	220
cg00201275_C6orf223	220
cg27024852_AP5Z1	220
cg15662184_TYK2	220
cg01114405_EXOC2	220
cg18771737_ANO10,SNRK	220
cg21243717_cg21243717_NA	220
cg23254316_MICAL2	220
cg20740051_B4GALT3,PPOX,ADAMTS4	220
cg07211707_cg07211707_NA	219
cg00218149_ZNF213,CASP16P,ZNF213-AS1	219
cg06285909_TANGO6	219
cg11797364_cg11797364_NA	219
cg08833675_SOX7	219
cg19606364_HHATL,HHATL-AS1,CCDC13	219
cg08849095_C9orf3,MIR27B,MIR23B	219
cg13510651_RXRA	219
cg22352371_IL17RD	219
cg15327380_ADGRB3	219
cg07081759_FAM53B	219
cg10332979_DNAH17	219
cg02905744_cg02905744_NA	219
cg13264394_MBNL1	219
cg01720795_LPP-AS2,LPP	219
cg09686333_cg09686333_NA	219
cg21731908_CKAP4	219
cg17504135_MED16,CFD	219
cg20208203_cg20208203_NA	219
cg19893670_UBE2D1	219
cg00946535_SMIM5,MYO15B,RECQL5	219
cg04573564_cg04573564_NA	219
cg16523463_MYL2	218
cg14380649_TM9SF3	218
cg18193613_PTPN4	218
cg26110562_AGAP1	218
cg03093194_PIN4P1,FRMD5	218
cg03313075_cg03313075_NA	218
cg23751110_cg23751110_NA	218
cg06819718_SIX2	218
cg21759907_THSD4	218
cg15724945_cg15724945_NA	218
cg13536060_SHANK1	218
cg15636859_RBM38	218
cg05278822_GAMT,NDUFS7,MUM1	218
cg18528591_COPS7B,PDE6D	218
cg26725552_LHPP,FAM53B	218
cg13857947_HDAC4	218
cg03037856_DES	218
cg17080913_GPR153,ACOT7	218
cg01233720_SMIM15,NDUFAF2	218
cg18362538_KDM4B	218
cg05986067_STOX2	217
cg21648324_TEAD1	217
cg18666454_KCNH2	217
cg25097946_SORBS1	217
cg00038877_COQ8A,CDC42BPA	217
cg12598211_PITPNM2,MPHOSPH9	217
cg00133624_CRACR2A	217
cg05004142_CCDC102A	217
cg15028507_GPER1,C7orf50	217
cg24128943_KCTD1	217
cg22419414_COG3	217
cg25821437_USP2,USP2-AS1	217
cg02077216_PLK2	217
cg07039975_DCTN1	217
cg15896560_KIF26B	217
cg10832281_PAMR1	217
cg27534828_AP5Z1	217
cg08422172_ZC3H7A	217
cg17310258_RCN1,PAX6	217
cg20580858_C6orf89	217
cg23741583_MOCS1	217
cg03786842_DHX32	217
cg06711560_C9orf172,PHPT1,MAMDC4	216
cg10823566_RCSD1	216
cg10437842_EHD4,EHD4-AS1	216
cg16279529_ERAP2	216
cg24710951_cg24710951_NA	216
cg23023126_MIER2	216
cg11757417_cg11757417_NA	216
cg08843537_PERM1,PLEKHN1	216
cg07066794_PTPN21	216
cg03141815_CUX1	216
cg05996789_SLC25A4	216
cg04614208_PACRG	216
cg02540736_SLC25A29	216
cg14331316_ZNF367,SLC35D2	216
cg23814172_PRR26,DIP2C	216
cg05234035_cg05234035_NA	216
cg08830520_ADCY6	216
cg00428692_LRRC14B,PLEKHG4B,CCDC127	216
cg20514290_FHOD3	216
cg25411725_OXSR1	216
cg07911084_TSPAN9	216
cg10062065_SPEG	216
cg03889450_WDR1	216
cg05787035_LGR6	216
ENSG00000268798_AC027307.3	216
cg01377124_ASB18	215
cg15621697_SLC4A4	215
cg01192077_EBF1	215
cg02697649_FZD7	215
cg23458168_ZNF536	215
cg27055365_VTCN1	215
cg16676292_ZNF408,ARHGAP1	215
cg11306767_GLRX,RHOBTB3	215
cg13286582_CDC42EP3	215
cg01808968_SLC1A7	215
cg20692268_cg20692268_NA	215
cg13103051_ST8SIA5	215
cg03618302_PDE3A	215
cg10552184_PFKFB3	215
cg16577707_LARP1	215
cg23870378_MEG3	215
cg07079828_PLCL2	215
cg17200850_HRH2	215
cg11129341_NAV2	215
cg05789881_RARB	215
cg22911054_CPT1A	215
cg02135245_ABR	215
cg00767886_EHD4,SPTBN5	214
cg05611648_KLHL30,ESPNL	214
cg10572807_PRDM16	214
cg01691827_FOXC2	214
cg05766921_CTNNA3	214
cg18124517_TNFRSF1B	214
cg14823363_KLHL21	214
cg09423181_AKAP1	214
cg19053223_ATXN7L1	214
cg00169122_ANKRD11	214
cg27116770_DNAJC5G,SLC30A3,TRIM54	214
cg11211486_FYCO1	214
cg20317521_BAIAP2	214
cg10281002_TBX5-AS1,TBX5	214
cg00927594_LRRK1	214
cg24260710_SREBF2	214
cg07965335_SORBS2	214
cg07361154_IGDCC4	214
cg11242764_DOK7	214
cg12200950_CHST8	214
cg22593953_ST6GAL1	214
ENSG00000130119_GNL3L	214
cg01025720_ATP11A	213
cg12349422_TNNC1,NISCH,SEMA3G	213
cg14031381_SEC14L1	213
cg21946374_SLC12A7	213
cg11252765_BLCAP,NNAT	213
cg08775230_CRYAB	213
cg05647756_UNK	213
cg14914552_PTDSS1	213
cg23308047_EMX2,EMX2OS	213
cg01386185_cg01386185_NA	213
cg14773365_HRH2	213
cg12178147_ACACB	213
cg19702176_cg19702176_NA	213
cg07562888_ZMIZ1	213
cg26730036_cg26730036_NA	213
cg10902667_PRKAG2	213
cg25513321_MYH7B	213
cg06411987_cg06411987_NA	213
cg13287621_cg13287621_NA	213
cg15397577_MIEF1,ATF4	213
cg01659038_cg01659038_NA	213
cg20610749_SNORA59A,VPS13D	213
cg02392737_ADCY9	213
cg04911679_PITPNM2	213
cg17389077_DOCK1	213
cg04991214_DEDD,NIT1,PFDN2	213
cg06147895_BNIP3	212
cg02455346_HLX	212
cg14663264_cg14663264_NA	212
cg05905030_cg05905030_NA	212
cg08464003_CYSTM1,PFDN1	212
cg26466258_LRRC14B,CCDC127,PLEKHG4B	212
cg02808257_DBNDD2,PIGT,TP53TG5	212
cg26284920_SGCD	212
cg03040530_OBSCN	212
cg18183774_MPI,FAM219B	212
cg01799521_RRAGC	212
cg24176288_CACNA1C	212
cg13379236_EGF	212
cg21667939_TOMM70	212
cg25024317_SLC4A3	212
cg07274516_cg07274516_NA	212
cg27437823_MAP3K14	212
cg06766016_BTBD19,PTCH2,PLK3,TCTEX1D4	212
cg21931784_cg21931784_NA	212
cg03035746_LBX2-AS1,LBX2,PCGF1,TTC31	212
cg03152500_EDEM2,PROCR	212
cg17508941_cg17508941_NA	212
cg11855117_TGFBR3	212
cg06520508_CPTP,CPSF3L,TAS1R3,DVL1	211
cg18202205_cg18202205_NA	211
cg25572459_NUAK1	211
cg24637261_MYOZ1,SYNPO2L	211
cg12371704_TSPAN9	211
cg11404795_SSH2,CORO6,ANKRD13B	211
cg11895696_ATXN7L1	211
cg07824800_MYPN	211
cg14064024_SLC25A29	211
cg03392564_ATAD3A,TMEM240,SSU72	211
cg05808226_MTHFR	211
cg18061327_EMILIN2,LPIN2	211
cg19443023_RPTOR	211
cg21983491_GNAS-AS1	211
cg17170442_DGKD	211
cg18006379_cg18006379_NA	211
cg07364162_PRDM16	210
cg16457413_TWF2,TLR9	210
cg15848364_NTM	210
cg26467918_MACROD1	210
cg25976755_KCNQ1	210
cg00916854_HIP1R,VPS37B	210
cg23444251_FGFR2	210
cg16285946_SUN1,GET4	210
cg01071314_PRDM16	210
cg25520146_cg25520146_NA	210
cg11964338_ZNF610	210
cg02205013_HN1L,MAPK8IP3	210
cg18589960_CLEC11A,SHANK1	210
cg12729166_PALMD	210
cg23207527_RBM24	210
cg16530165_NPPC	210
cg08837215_AANAT,UBE2O	210
[truncated: 14,912 more rows]

## Sheet: LF4_node_degree
feature	degree
ENSG00000122729_ACO1	6097
ENSG00000165152_TMEM246	5863
ENSG00000141627_DYM	5439
ENSG00000115840_SLC25A12	5322
ENSG00000145362_ANK2	5041
ENSG00000112294_ALDH5A1	4669
ENSG00000163380_LMOD3	4584
ENSG00000102763_VWA8	4507
ENSG00000124164_VAPB	4460
ENSG00000101266_CSNK2A1	4186
ENSG00000169446_MMGT1	4050
ENSG00000143252_SDHC	4021
ENSG00000023228_NDUFS1	3921
ENSG00000066926_FECH	3779
ENSG00000086200_IPO11	3703
ENSG00000132824_SERINC3	3616
ENSG00000136478_TEX2	3586
ENSG00000082213_C5orf22	3569
ENSG00000157077_ZFYVE9	3568
ENSG00000102910_LONP2	3382
ENSG00000168827_GFM1	3356
ENSG00000151320_AKAP6	3334
ENSG00000148498_PARD3	3122
ENSG00000112992_NNT	2987
ENSG00000077380_DYNC1I2	2890
ENSG00000154001_PPP2R5E	2230
ENSG00000136628_EPRS	2007
ENSG00000134900_TPP2	1994
ENSG00000080802_CNOT4	1985
ENSG00000135040_NAA35	1930
ENSG00000146223_RPL7L1	1716
ENSG00000177613_CSTF2T	1715
ENSG00000137815_RTF1	1645
ENSG00000131558_EXOC4	1636
ENSG00000166197_NOLC1	1612
ENSG00000187555_USP7	1585
ENSG00000181929_PRKAG1	1445
ENSG00000177981_ASB8	1274
ENSG00000082516_GEMIN5	1195
ENSG00000164091_WDR82	998
ENSG00000102974_CTCF	448
cg03598112_cg03598112_NA	40
cg03759993_TNFRSF19	38
cg01402099_LRRC43	38
cg15015996_ARHGEF16	38
cg19569531_PARD3	38
cg17862146_cg17862146_NA	37
cg22134372_GNB5	37
cg21878598_NANP	37
cg01803654_AGAP1	37
cg00577417_TMEM253,ARHGEF40,ZNF219	37
cg10869669_ITGB4,GALK1	37
cg02127411_NOTCH4	37
cg20266715_CAPN2	36
cg07062262_CLPB	36
cg15998406_MUM1,C19orf24	36
cg24153714_C10orf11	36
cg04060561_ECHDC1	36
cg19918549_EVL	36
cg02550950_HECW2	36
cg03404742_CCDC113	36
cg24693478_PLXNA2	36
cg08128361_cg08128361_NA	36
cg03954393_cg03954393_NA	36
cg24082174_EIF4A2,RFC4	35
cg19582222_cg19582222_NA	35
cg13502716_WDR82,PPM1M,TWF2,TLR9	35
cg19710916_cg19710916_NA	35
cg04951476_FAM50B	35
cg19755241_cg19755241_NA	35
cg25405138_PARD3	35
cg04301760_TSC2,NTHL1	35
cg21787848_cg21787848_NA	35
cg17018767_LOXHD1	35
cg02313130_CAPN8	35
cg14374923_cg14374923_NA	35
cg24069602_SCN4A	35
cg03519879_ELMSAN1	35
cg16918327_RPTOR	35
cg21593554_TAP1	35
cg11189177_ABR	35
cg27627493_cg27627493_NA	35
cg12793123_ADORA2A,ADORA2A-AS1,SPECC1L	35
cg01810719_TECTA	35
cg20737554_NHLRC2,DCLRE1A	35
cg15131883_DAB1	35
cg27119877_cg27119877_NA	35
cg17142066_cg17142066_NA	35
cg23516824_F2RL1	35
cg25821785_CYB561D2,TMEM115,CACNA2D2	35
cg23518039_ABLIM3	35
cg17066529_BACH2	35
cg03748210_ARHGEF10	35
cg00364696_GPER1,C7orf50	35
cg09247020_cg09247020_NA	35
cg01043681_E2F7	34
cg09510954_SH3BP4	34
cg14211977_SRGAP1	34
cg05492113_TUB	34
cg25939861_CD8A	34
cg19616339_cg19616339_NA	34
cg16248034_PIP5K1C	34
cg26799474_CASP8,CASP10	34
cg19283806_CCDC102B,TMX3	34
cg08412215_CHPT1,GNPTAB,SYCP3	34
cg26438846_KCNQ1	34
cg26394380_cg26394380_NA	34
cg03252499_cg03252499_NA	34
cg13221681_MMEL1,FAM213B	34
cg00215182_C1QB,C1QC	34
cg23962746_cg23962746_NA	34
cg04835091_cg04835091_NA	34
cg21755790_cg21755790_NA	34
cg23261171_AKAP11	34
cg10887366_WDFY4	34
cg04276626_VMP1	34
cg19721554_ZNF366	34
cg10851763_UMODL1	34
cg22879174_FCHSD1,ARAP3	34
cg09518195_LRP5	34
cg02094337_FOXK2	34
cg17560832_cg17560832_NA	34
cg16493584_SAMD3	34
cg11585280_RUNX3	34
cg18772205_KLHL6	34
cg20070418_PER2	34
cg17164151_cg17164151_NA	33
cg15990632_KIRREL	33
cg16430963_WWTR1,WWTR1-AS1	33
cg11003133_AIM2	33
cg15541062_HBG2,UBQLNL,OLFM5P	33
cg19292760_CD44	33
cg12910851_IL1R2	33
cg01403532_PDPK1,PDPK2P	33
cg19235065_MUTYH,HPDL,TOE1	33
cg06395634_LDLRAP1	33
cg16799191_cg16799191_NA	33
cg17989833_WT1	33
cg09196534_MAGI2	33
cg14499678_TRIP13	33
cg14055655_PRR12	33
cg00426089_cg00426089_NA	33
cg02892367_PDIA4	33
cg18537482_KBTBD11-OT1,ARHGEF10	33
cg26106316_cg26106316_NA	33
cg26131315_MAML3	33
cg10217292_LPCAT1	33
cg02455792_ARHGEF19	33
cg08597802_CAPZB,PQLC2	33
cg26118643_PARK7	33
cg13108255_NCF2,SMG7	33
cg06283052_cg06283052_NA	33
cg07431944_IFT140,TMEM204	33
cg24756642_cg24756642_NA	33
cg23158500_cg23158500_NA	33
cg17249782_cg17249782_NA	33
cg01740544_HNRNPA2B1,NFE2L3	33
cg25123521_SYNPO,MYOZ3	33
cg08605301_WIPF3	33
cg03876697_IL17B,PCYOX1L	33
cg01924435_cg01924435_NA	33
cg25845158_CLIC1	33
cg17469934_EPS8L2	33
cg04229487_APCDD1	33
cg22608160_SLC44A3,CNN3	33
cg08879111_IL1R2	32
cg14529643_ACAP3,SCNN1D	32
cg18346398_FOXC1,GMDS	32
cg03427191_MGRN1	32
cg06909254_ST3GAL5	32
cg06617692_GNA14	32
cg08255105_IL16	32
cg17115419_cg17115419_NA	32
cg16895216_KIF25	32
cg14207613_COL5A1	32
cg26354222_DZIP1L,KRT8P36	32
cg23680787_cg23680787_NA	32
cg19872463_MLF2,LAG3,PTMS	32
cg02598564_cg02598564_NA	32
cg16711597_STK24	32
cg01388565_cg01388565_NA	32
cg18334977_cg18334977_NA	32
cg14027403_SEMA4G,SLF2,MRPL43	32
cg03832371_SFMBT2	32
cg12435134_SDAD1,NAAA	32
cg10550611_EGFR	32
cg01062838_CARD6,RPL37	32
cg00184953_cg00184953_NA	32
cg13831216_AUTS2	32
cg01364935_C16orf47	32
cg19438750_SV2B	32
cg11125037_OPLAH	32
cg02244028_SCN11A	32
cg09873524_NIPA1	32
cg02542748_cg02542748_NA	32
cg06894710_C10orf11	32
cg12017722_ISG20,AEN	32
cg26981966_cg26981966_NA	32
cg25575961_C16orf74	32
cg06431514_CELF2	32
cg04410355_COQ8B,ITPKC	32
cg07529087_FURIN	32
cg25460281_cg25460281_NA	32
cg00104167_cg00104167_NA	32
cg03167812_AGAP1	32
cg07444054_cg07444054_NA	31
cg21049825_cg21049825_NA	31
cg04344000_GOPC,DCBLD1	31
cg15742700_BLK	31
cg07414422_FRMD4A	31
cg23264682_GALNT8	31
cg08711059_PSD2	31
cg15014369_HDAC9	31
cg08319074_ZSWIM4	31
cg14754187_CTNNA2	31
cg13402865_cg13402865_NA	31
cg14022313_cg14022313_NA	31
cg10791422_cg10791422_NA	31
cg06865036_KRI1,CDKN2D	31
cg15894103_LINC-PINT	31
cg19335064_APOL4	31
cg10526598_ARPC4,TTLL3	31
cg04352288_cg04352288_NA	31
cg14491284_PPBP,PF4	31
cg24719489_PBX1	31
cg03052071_CFAP46	31
cg24868960_cg24868960_NA	31
cg21010202_FOXC1,GMDS	31
cg13476200_TTLL11	31
cg07894822_MYH16	31
cg02646706_cg02646706_NA	31
cg14268120_GSG2,ITGAE	31
cg06755448_VPS9D1-AS1,VPS9D1,ZNF276	31
cg17834632_METRNL	31
cg25683989_HVCN1	31
cg19935040_FAM171A2,GRN	31
cg07796597_CELF2	31
cg11253804_PPAN,P2RY11,EIF3G	31
cg07331701_B4GALT6	31
cg07277923_cg07277923_NA	31
cg25201998_KCNN3	31
cg13810723_SRRM4	31
cg26127925_cg26127925_NA	31
cg09619751_cg09619751_NA	31
cg09518219_TNRC18	31
cg02487130_SPEG	31
cg27313201_TPM3	31
cg00058291_cg00058291_NA	31
cg19723952_RNF212	31
cg06197616_MYO7B	31
cg19868751_GABRD	31
cg16560847_cg16560847_NA	31
cg04604142_LUC7L3	31
cg17242981_cg17242981_NA	31
cg07645286_RAPGEF4	30
cg05824768_MYO7B	30
cg04571509_AP4E1	30
cg13332193_CHRNE,MINK1,C17orf107	30
cg27508586_GLDN	30
cg03396249_cg03396249_NA	30
cg21197224_SRSF1	30
cg08699794_IFT140,TELO2	30
cg20299399_KAZN	30
cg26441627_cg26441627_NA	30
cg03946707_KIAA1522	30
cg00238362_cg00238362_NA	30
cg05868469_cg05868469_NA	30
cg19847244_ALDH1A2	30
cg17206001_CD3D,CD3G	30
cg03559915_PTPRCAP,RPS6KB2,CORO1B,CARNS1	30
cg26164773_TIAL1	30
cg02266759_cg02266759_NA	30
cg24931346_C1QC,C1QB	30
cg18033628_RAI1	30
cg20742389_PKN1,GIPC1,SNRPGP15	30
cg16694293_RPL36,LONP1	30
cg04837722_IGF2R	30
cg09718739_cg09718739_NA	30
cg11650164_BCAR3	30
cg19138905_cg19138905_NA	30
cg25368728_cg25368728_NA	30
cg06550704_ITGB4,GALK1	30
cg06961354_cg06961354_NA	30
cg05856556_ZNF775	30
cg14440205_cg14440205_NA	30
cg06580770_cg06580770_NA	30
cg05964918_cg05964918_NA	30
cg03143395_SORBS2	30
cg23325413_cg23325413_NA	30
cg06169597_HCN2,POLRMT	30
cg26992245_cg26992245_NA	30
cg20380768_cg20380768_NA	30
cg26280179_cg26280179_NA	30
cg10787713_RASL11A	30
cg05012661_KIAA0232	30
cg24117963_PLCB2,PAK6	30
cg06182923_CSMD2	30
cg09489825_cg09489825_NA	30
cg06823681_SLC6A12,SLC6A13	30
cg07824497_cg07824497_NA	30
cg07263759_cg07263759_NA	30
cg07932334_RASA3	30
cg17494772_FBXL18	30
cg23553368_TRIM5	30
cg26251098_NTM	30
cg13061910_cg13061910_NA	30
cg12168357_ARHGEF1	29
cg05225089_LRP1	29
cg07043604_PRKDC	29
cg10468951_LSMEM2	29
cg19008720_ARHGAP45,ABCA7	29
cg12551394_cg12551394_NA	29
cg16028175_RCN3,NOSIP	29
cg14728380_SECTM1,CD7	29
cg02031308_cg02031308_NA	29
cg15741855_CAPN14	29
cg05860978_PCYOX1L,IL17B	29
cg04882349_FAM159A	29
cg24064639_FAM20A	29
cg25929046_GNAZ	29
cg19108736_MAPT	29
cg02423817_RPS6KB2,CORO1B,PTPRCAP	29
cg16960674_cg16960674_NA	29
cg06751920_cg06751920_NA	29
cg25645491_HLA-DRA	29
cg12115190_ATP2B2	29
cg19712979_SLC39A7	29
cg26914931_AGAP1	29
cg15036326_RAB34,NEK8,TLCD1,PROCA1,RPL23A	29
cg12811871_ZFYVE28	29
cg16189093_MIR100HG	29
cg17878351_CLIC5	29
cg13775593_cg13775593_NA	29
cg02214441_INPP5J	29
cg25954269_cg25954269_NA	29
cg27565899_AMPD2	29
cg17218882_cg17218882_NA	29
cg00530015_cg00530015_NA	29
cg02583589_cg02583589_NA	29
cg06671614_CXCL12	29
cg02764250_SORBS1	29
cg12251075_NME2,NME1	29
cg19733463_NMUR1	29
cg11162888_cg11162888_NA	29
cg08778805_FAT3	29
cg06740578_cg06740578_NA	29
cg12432526_cg12432526_NA	29
cg18236862_cg18236862_NA	29
cg14053764_FBXO34	29
cg12399197_THSD4	29
cg07561338_RBPMS	29
cg25198275_OVCH1,TMTC1	29
cg10603156_FRMD4A	29
cg25561904_KLC1,XRCC3	29
cg00485050_SDR42E1	29
cg04585937_cg04585937_NA	29
cg18543428_RFXAP	29
cg22735331_CD81-AS1	29
cg01591881_TBCB,POLR2I	29
cg03115530_CSNK1G2	29
cg07669973_KNDC1	29
cg06044468_BAALC,BAALC-AS1	29
cg22988346_ADGRB1	29
cg01417714_CLK2,SCAMP3,GBA	29
cg23328237_cg23328237_NA	29
cg13608684_cg13608684_NA	29
cg07680649_ZNF704	29
cg08827110_TRAIP	29
cg25989783_NCALD	29
cg14485765_cg14485765_NA	29
cg04981696_ABCC1	29
cg24999862_LRRK1	29
cg03804083_MECOM	29
cg03539747_cg03539747_NA	29
cg05129858_cg05129858_NA	29
cg25968469_ARHGAP22	29
cg01275934_SNX8,NUDT1	29
cg16426366_KBTBD11,KBTBD11-OT1	29
cg18618334_CXCL12	29
cg09416903_SUSD4	29
cg07418126_CD37,SLC6A16,TEAD2	29
cg00397849_TMIE,ALS2CL	29
cg22094045_cg22094045_NA	28
cg26901352_CCL17	28
cg02966200_SERPINE2	28
cg09029046_IRF2	28
cg13112511_PDE4D	28
cg06354543_cg06354543_NA	28
cg22416002_RPL3	28
cg04973505_cg04973505_NA	28
cg25045785_INPP5F	28
cg24542230_RNF213	28
cg17256192_CDH6	28
cg17213699_MLF2,PTMS,LAG3	28
cg08686879_cg08686879_NA	28
cg00171092_ITGB5	28
cg23952828_KANSL1	28
cg25075776_DDR1	28
cg16470760_CD4	28
cg08537804_DSCAML1	28
cg24364144_SERBP1	28
cg16272981_LPCAT1	28
cg02379079_BPI	28
cg13579752_MFAP3,GALNT10	28
cg03004126_cg03004126_NA	28
cg23459424_BRE	28
cg00497737_WFDC1	28
cg12077176_FBXW8	28
cg15201458_cg15201458_NA	28
cg02398482_ULBP2	28
cg07675031_SPI1	28
cg05459517_ZHX2	28
cg02761110_MAGI1-IT1,MAGI1	28
cg26392328_PCTP	28
cg21385052_cg21385052_NA	28
cg20016416_SPTBN2	28
cg16031528_cg16031528_NA	28
cg05220751_SORBS2	28
cg24240804_CRYBB3,KIAA1671	28
cg10373607_TSHZ2	28
cg10480506_cg10480506_NA	28
cg10211193_cg10211193_NA	28
cg17728065_RORA	28
cg04494562_PCCA	28
cg11193201_FCRLA	28
cg09648454_ABCC12	28
cg23530981_POU6F1	28
cg14229071_cg14229071_NA	28
cg18837947_CCNG2	28
cg18417201_SUMF1	28
cg14837148_cg14837148_NA	28
cg12807746_LMAN2	28
cg27397757_GLIS1	28
cg13992008_FAM102A	28
cg02417408_WDR82,PPM1M,TLR9,TWF2	28
cg06567596_LMTK2	28
cg09131339_SORT1	28
cg07618110_MS4A1	28
cg06109939_KIAA1549L	28
cg22563286_cg22563286_NA	28
cg09191594_TDRD9	28
cg13054640_cg13054640_NA	28
cg04553623_SLC19A1,COL18A1	28
cg01996004_BTNL8	28
cg23426002_BDNF-AS,BDNF	28
cg15576669_TSPAN18	28
cg03840259_GRAP2	28
cg19637113_cg19637113_NA	28
cg21159689_C1orf198	28
cg06119575_TAL2	28
cg23996800_TSKU	28
cg01719079_C7orf50,GPER1	28
cg14808040_DNAH10OS,CCDC92,DNAH10	28
cg19234171_GATA2-AS1	28
cg12197579_MEG3	28
cg07835443_SPATA33	28
cg17561788_RANBP1,ZDHHC8,TRMT2A	28
cg05922993_cg05922993_NA	28
cg20284891_GPR157	28
cg04483469_SLC12A9,EPHB4	28
cg23814714_ATF6B	28
cg23117647_cg23117647_NA	28
cg08423378_cg08423378_NA	28
cg02100381_COL4A2	28
cg16652598_RADIL	28
cg21232937_TSPOAP1-AS1,TSPOAP1	28
cg08746853_H2AFJ,HIST4H4	28
cg09293890_cg09293890_NA	28
cg04997558_RAB40B	28
cg11685391_KCNIP2,KCNIP2-AS1	28
cg22686718_cg22686718_NA	28
cg01206705_HACD3	28
cg21289738_NDEL1,MYH10	28
cg23216654_SAMD14,PDK2	28
cg05897169_SLFN5	28
cg00565412_MIR155HG	27
cg23598310_cg23598310_NA	27
cg17485530_BPI	27
cg23397013_cg23397013_NA	27
cg17525220_DENND3	27
cg01936220_RASA3	27
cg01140247_C10orf11	27
cg25484252_LINC00877	27
cg08843248_CBFA2T3	27
cg05691806_RPS6KA2	27
cg26719625_TRPV2	27
cg05635114_PIEZO1	27
cg19707448_KSR1	27
cg04367395_TIAF1,MYO18A	27
cg06826760_GLRX2	27
cg24749089_FMNL2	27
cg09083345_FOXC1	27
cg03074126_BCAM	27
cg24726121_AGAP1	27
cg25718026_cg25718026_NA	27
cg18087256_cg18087256_NA	27
cg01475325_TSKU	27
cg16967068_cg16967068_NA	27
cg17554182_WNT11	27
cg05299836_KAT8,BCKDK	27
cg17399143_cg17399143_NA	27
cg15316716_DOK2,XPO7	27
cg09287864_cg09287864_NA	27
cg19342382_cg19342382_NA	27
cg21532801_PPP4R1L,RAB22A	27
cg09363128_cg09363128_NA	27
cg08508724_cg08508724_NA	27
cg25225693_PVRIG,STAG3,GATS	27
cg11846559_BRSK1,HSPBP1	27
cg08034986_RPS6KA1	27
cg21769820_PRKAR1B	27
cg12572295_GRK4	27
cg26686366_TBXAS1	27
cg06495184_C2CD4C	27
cg10024505_ESRRB	27
cg04556519_cg04556519_NA	27
cg12736773_cg12736773_NA	27
cg05946118_USP7	27
cg04886221_SYTL1,TMEM222	27
cg21926451_ADAMTS16	27
cg16163174_cg16163174_NA	27
cg22132876_HELZ2	27
cg04086012_cg04086012_NA	27
cg12137473_cg12137473_NA	27
cg11553308_AGAP1	27
cg02083319_PDLIM7,DDX41,DOK3	27
cg10042846_CCL13	27
cg08032619_TBCB	27
cg11223361_cg11223361_NA	27
cg16725642_EPHB4,SLC12A9	27
cg25662428_MKNK2	27
cg22279588_C1QTNF7	27
cg16095155_CCHCR1	27
cg01209642_LINC01624,DLL1	27
cg05302035_KIF11	27
cg26620176_cg26620176_NA	27
cg14989661_OXSR1	27
cg07594007_cg07594007_NA	27
cg07971596_cg07971596_NA	27
cg14006266_PHF24	27
cg14502319_cg14502319_NA	27
cg26801538_CARS2	27
cg08109681_RPS6KA2	27
cg01188235_cg01188235_NA	27
cg17517997_ST6GALNAC3	27
cg12094903_TAP1	27
cg04117404_PCDHGA4,PCDHGB7,PCDHGA7,PCDHGA9,PCDHGA5,PCDHGA2,PCDHGB4,PCDHGB6,PCDHGB2,PCDHGB3,PCDHGB1,PCDHGA6,PCDHGA3,PCDHGA1,PCDHGA8,PCDHGA10,PCDHGA12,PCDHGA11	27
cg12575674_cg12575674_NA	27
cg15829665_PNLDC1	27
cg20699701_PRDM16	27
cg19828748_ZFYVE21,KLC1,XRCC3	27
cg10303967_SDC2	27
cg02990598_CSNK1G2	27
cg01923894_C1orf35,MRPL55,ARF1	27
cg04817034_USP35,GAB2	27
cg14178077_PCSK5	27
cg13244315_AGRN	27
cg06219732_LRRC20	27
cg11348165_ZDHHC18	27
cg07628717_FOXK1	27
cg16263005_cg16263005_NA	27
cg25361694_MEGF6	27
cg10495160_cg10495160_NA	27
cg09447621_B3GAT1,GLB1L2	27
cg04629914_TRIM2	27
cg02703235_cg02703235_NA	27
cg22758916_cg22758916_NA	27
cg13240704_CCDC57	27
cg01780685_DLG4	27
cg08305942_cg08305942_NA	27
cg16463557_cg16463557_NA	27
cg10410483_STEAP1B	27
cg08877463_cg08877463_NA	27
cg12219155_NPAS2	27
cg04166500_EVL	27
cg10564013_DTYMK,ATG4B	27
cg01744056_PARVA	27
cg04650238_cg04650238_NA	27
cg19457770_cg19457770_NA	27
cg24217877_cg24217877_NA	27
cg00613255_cg00613255_NA	27
cg16736279_SDK1	27
cg02098413_HACE1	27
cg15016079_LINC01431,GZF1,NAPB	27
cg16779976_cg16779976_NA	27
cg18736105_cg18736105_NA	27
cg17960629_FEZ2	27
cg01739831_SPIRE2	27
cg09412975_cg09412975_NA	27
cg06587435_cg06587435_NA	27
cg23369107_ADAM23	27
cg24624090_SLIT3	27
cg26305504_ARID3A	27
cg23155767_GPR1	27
cg10701110_USF1,TSTD1,ARHGAP30	27
cg25940008_WNT9A	26
cg23834919_cg23834919_NA	26
cg23672659_cg23672659_NA	26
cg24152264_cg24152264_NA	26
cg25278144_TBC1D16	26
cg14334258_cg14334258_NA	26
cg03957124_COX6A1P2	26
cg03969763_cg03969763_NA	26
cg02935272_MYOM1	26
cg01976002_cg01976002_NA	26
cg12044599_CORO1B,PTPRCAP,RPS6KB2	26
cg02499814_cg02499814_NA	26
cg14596987_PTCH1	26
cg10435235_ARHGEF7	26
cg00886909_CFI	26
cg14318455_PELI3,DPP3,MRPL11	26
cg14425908_RUNX3	26
cg06100570_MAD1L1	26
cg02740606_CORO1B,PTPRCAP,RPS6KB2	26
cg13856340_SCAI	26
cg03312565_cg03312565_NA	26
cg05549575_SCIMP	26
cg20641675_UPP1	26
cg09111831_IQSEC3	26
cg09693588_cg09693588_NA	26
cg12240237_cg12240237_NA	26
cg03458695_C10orf11	26
cg12179154_GALNT1	26
cg06708683_DBF4B	26
cg05330472_LRFN4,PC	26
cg26477856_PYM1,DGKA	26
cg23612492_WDR25	26
cg07012178_PRKAG2	26
cg08845685_cg08845685_NA	26
cg15035143_TSPOAP1,TSPOAP1-AS1	26
cg19961980_cg19961980_NA	26
cg21772489_CDC42	26
cg07141875_TENM2	26
cg03715204_cg03715204_NA	26
cg13643184_RASA3	26
cg17956775_cg17956775_NA	26
cg00301726_cg00301726_NA	26
cg08409956_GOLGA3,RPS11P5,CHFR	26
cg26468152_VPS4A,PDF,COG8	26
cg10381153_CACHD1	26
cg00862408_CARNS1,TBC1D10C,PPP1CA	26
cg21996761_NRXN2	26
cg13739659_CCDC180	26
cg09169455_MYO10	26
cg17507897_SNX5,MGME1,SNORD17	26
cg16266809_ASXL1	26
cg11115622_PLEKHG3	26
cg19630951_DPYSL3,STK32A	26
cg08002981_BCAS3	26
cg03180322_STARD5,IL16	26
cg04100337_SDK2	26
cg13387972_DIP2C	26
cg23048215_ARID3A	26
cg00416945_cg00416945_NA	26
cg18784565_RNF213	26
cg09959790_cg09959790_NA	26
cg00362818_FBXL3,CLN5	26
cg11364256_GLI3	26
cg22250556_cg22250556_NA	26
cg08279035_NFATC4	26
cg06037693_RUNX3	26
cg05087982_RAP1GAP	26
cg19960778_HK3,UNC5A	26
cg18952546_cg18952546_NA	26
cg23567690_MSI2	26
cg25527070_BDH1	26
cg14276125_ANKRD13D,GRK2	26
cg07596106_GREB1	26
cg11701312_ZNF837,RPS5	26
cg10287321_cg10287321_NA	26
cg17516571_cg17516571_NA	26
cg10317815_cg10317815_NA	26
cg16695253_BANP	26
cg05204315_DOCK1	26
cg14887955_TDGF1	26
cg22515475_cg22515475_NA	26
cg18786171_ADK	26
cg10356260_SORCS2	26
cg15719903_VAMP1,TAPBPL,CD27,CD27-AS1	26
cg01138448_TRIM69	26
cg12438430_cg12438430_NA	26
cg01101522_NKD2	26
cg06749872_CORO1A	26
cg01716465_cg01716465_NA	26
cg11145826_UNC45A,HDDC3	26
cg18297705_MRPL23,MRPL23-AS1	26
cg03782800_cg03782800_NA	26
cg03343128_GCSAML	26
cg22561757_SCARA3	26
cg17066452_SLC39A7	26
cg22791324_PTPRN2	26
cg14421288_RPS29	26
cg05349159_GCSAML	26
cg07592012_LRRC45,STRA13,ASPSCR1	26
cg01770571_cg01770571_NA	26
cg02974976_NAP1L4P1,CD58	26
cg15908877_NFATC1	26
cg26357403_cg26357403_NA	26
cg07523071_ATP5SL,BCKDHA,B3GNT8	26
cg17122213_CDK11B,MMP23B,MIB2	26
cg05135176_PTPRN2	26
cg03825255_DGKD	26
cg11343506_cg11343506_NA	26
cg23768572_NXN	26
cg04523868_MEN1,MAP4K2	26
cg10878444_SPTLC2	26
cg16529592_RUNX3	26
cg13663911_cg13663911_NA	26
cg27268501_cg27268501_NA	26
cg10256976_NAV2,NAV2-AS2	26
cg19537184_cg19537184_NA	26
cg14222679_CYP4B1	25
cg00392257_ISG20L2,RRNAD1	25
cg25750004_TBC1D16	25
cg12459932_RUNX3	25
cg09825327_TRAF5	25
cg12244013_cg12244013_NA	25
cg11231069_MIR4269,HDAC4	25
cg25992016_cg25992016_NA	25
cg16507631_ARHGEF10	25
cg08350797_DUSP7	25
cg08652441_STAT3	25
cg16524818_NID1	25
cg15733827_VPS52,RPS18	25
cg02625481_DNAJC10	25
cg10673246_BTBD11	25
cg20235471_cg20235471_NA	25
cg19510565_LAPTM5	25
cg23138413_cg23138413_NA	25
cg05223210_DSCAML1	25
cg00754989_PKM,PARP6	25
cg10558740_CASC15	25
cg00762397_PRELP	25
cg04469998_cg04469998_NA	25
cg21457110_cg21457110_NA	25
cg22631203_cg22631203_NA	25
cg25727853_cg25727853_NA	25
cg13316433_cg13316433_NA	25
cg14118946_PHF24,DNAJB5	25
cg26175448_cg26175448_NA	25
cg19390934_MTERF4,SNED1	25
cg04561791_cg04561791_NA	25
cg27093949_LAMB4	25
cg03531211_cg03531211_NA	25
cg04287259_PIK3CD-AS2,PIK3CD	25
cg20725239_cg20725239_NA	25
cg23750151_TAP1	25
cg00231812_cg00231812_NA	25
cg08335767_C6orf1,HMGA1	25
cg10399946_VPS52,RPS18	25
cg07215975_PTPRE	25
cg17158941_C7orf50	25
cg24107611_NAV2	25
cg05839818_cg05839818_NA	25
cg16408081_PTPRCAP,CORO1B,RPS6KB2	25
cg20745620_DUSP1	25
cg16462297_PGR	25
cg24464502_CDH4	25
cg27410595_TRIM29	25
cg08678055_cg08678055_NA	25
cg25562534_cg25562534_NA	25
cg16296469_cg16296469_NA	25
cg05304729_MNDA	25
cg15228451_cg15228451_NA	25
cg13917918_COL5A1	25
cg03536334_cg03536334_NA	25
cg05226740_cg05226740_NA	25
cg17828445_CDK4,MARCH9,TSPAN31,CYP27B1	25
cg08092258_SH3BP4	25
cg19587777_CALML3-AS1	25
cg16247184_CEP112	25
cg13585927_MVB12B	25
cg19547124_cg19547124_NA	25
cg03702686_VPS52,RPS18	25
cg02189001_cg02189001_NA	25
cg14794741_CAMTA1	25
cg26483075_cg26483075_NA	25
cg14253677_PUM3	25
cg18113803_MARC1	25
cg20023788_cg20023788_NA	25
cg00701514_cg00701514_NA	25
cg14305641_MBD3,MEX3D	25
cg11372934_SPON2,CTBP1	25
cg16193207_CHMP7	25
cg25465606_HSF2BP,RRP1B	25
cg19640779_cg19640779_NA	25
cg19678266_FMOD	25
cg10574843_MRPL23,MRPL23-AS1	25
cg14209244_SMC5-AS1,SMC5	25
cg24276787_PPP1R11	25
cg25523477_cg25523477_NA	25
cg05113958_WFIKKN2	25
cg10011856_LINC01057	25
cg06847021_ACSF3	25
cg23819145_ITSN2	25
cg12517323_COL1A2	25
cg21197336_cg21197336_NA	25
cg02459519_cg02459519_NA	25
cg05919685_cg05919685_NA	25
cg17207090_HNRNPUL2-BSCL2,TTC9C,HNRNPUL2	25
cg03594801_TBC1D16	25
cg15717844_cg15717844_NA	25
cg21659346_LINC01537,PDE2A	25
cg25050392_FAM65B	25
cg12019893_KRBOX1,ZNF662	25
cg10239638_cg10239638_NA	25
cg22142922_ANO1	25
cg05556202_UBXN7	25
cg26799196_cg26799196_NA	25
cg23750365_cg23750365_NA	25
cg27086900_MEG3	25
cg16581199_MCC	25
cg04315214_PRKCZ	25
cg24738924_GLI2	25
cg11311280_PPM1H	25
cg02978505_cg02978505_NA	25
cg21878759_LOXHD1	25
cg17137888_cg17137888_NA	25
cg18541087_cg18541087_NA	25
cg20735954_SYNGR1	25
cg03562952_LPCAT1	25
cg07841371_TTLL10	25
cg24861866_TUBGCP2	25
cg17848515_SMPD4,TUBA3E,MZT2B	25
cg04651623_cg04651623_NA	25
cg03753385_FBXL6	25
cg18258397_cg18258397_NA	25
cg16954727_cg16954727_NA	25
cg00637824_CDH24,PSMB5	25
cg27309038_cg27309038_NA	25
cg09884350_BACE2	25
cg11833244_POU6F1	25
cg06373817_LINC00930	25
cg15900221_ARHGEF16	25
cg04200562_UBE2D2	25
cg18091083_RPTOR	25
cg05858136_ALKBH2,UNG,USP30	25
cg16533314_CORO7,DNAJA3	25
cg00232105_SLC25A29,YY1	25
cg04562776_ELOVL5	25
cg03876085_COL18A1	24
cg02039404_C2orf42	24
cg05513157_CTNNA2	24
cg20443278_TBC1D16	24
cg13277963_FOXN3	24
cg13525062_PTPRN2	24
cg21672829_AGAP1	24
cg06842253_cg06842253_NA	24
cg13638867_cg13638867_NA	24
cg08428292_cg08428292_NA	24
cg27565277_XYLT1	24
cg14899408_FXYD2,FXYD6	24
cg11287987_DUSP3	24
cg00464946_PHGDH,ZNF697	24
cg07010486_PLEKHA6	24
cg09637963_cg09637963_NA	24
cg15518883_ARHGEF39,CCDC107,SIT1,CD72	24
cg13856126_ANGPTL2,RALGPS1	24
cg08549335_ZNRF2	24
cg18505752_TAP1	24
cg01300096_SYNGAP1,PHF1,CUTA	24
cg04198210_cg04198210_NA	24
cg07536737_cg07536737_NA	24
cg07416733_RHOD	24
cg08818984_NR3C1	24
cg17046484_B9D1	24
cg09391761_COL6A3	24
cg23737062_FBXL22,HERC1,USP3,USP3-AS1	24
cg10862620_cg10862620_NA	24
cg18154417_TRABD2B	24
cg19297427_cg19297427_NA	24
cg09205611_CYP19A1,GLDN	24
cg23542572_PRKCA	24
cg16947025_cg16947025_NA	24
cg08548882_PLEKHG1	24
cg20481655_cg20481655_NA	24
cg13138279_NUFIP2	24
cg12801030_cg12801030_NA	24
cg07512258_CAMK2G	24
cg01257383_MDK,AMBRA1,DGKZ	24
cg24376689_cg24376689_NA	24
cg05088892_cg05088892_NA	24
cg04706229_cg04706229_NA	24
cg25143652_PTK6	24
cg02578087_SSUH2	24
cg09858392_cg09858392_NA	24
cg17977649_cg17977649_NA	24
cg27368718_DLGAP1	24
cg06257110_METTL9,IGSF6	24
cg23254528_cg23254528_NA	24
cg19514854_KRT19	24
cg24940706_TCF3	24
cg04343928_cg04343928_NA	24
cg13941801_LINC00476	24
cg03917473_cg03917473_NA	24
cg16689193_FARP1	24
cg25968206_cg25968206_NA	24
cg12924309_cg12924309_NA	24
cg14909325_cg14909325_NA	24
cg05387269_MXRA8,AURKAIP1	24
cg01755342_TMEM52	24
cg21344159_ADGRD1	24
cg25876840_CD300LG,MPP3	24
cg08892082_TRDMT1	24
cg25440680_STBD1,CCDC158	24
cg01726767_cg01726767_NA	24
cg12493761_cg12493761_NA	24
cg23569968_cg23569968_NA	24
cg01081096_ABCB8,NOS3,ATG9B	24
cg05007163_CBX6	24
cg23851932_EHD1	24
cg12036877_SMG5,PMF1,PAQR6,BGLAP	24
cg00327947_cg00327947_NA	24
cg02522485_DAG1	24
cg21225667_MYO1E	24
cg14143304_cg14143304_NA	24
cg26199552_cg26199552_NA	24
cg12274898_S100A14,S100A13,S100A16	24
cg04447362_cg04447362_NA	24
cg15240033_cg15240033_NA	24
cg24993711_cg24993711_NA	24
cg08331398_TAP1	24
cg21426686_SLC6A13	24
cg04309480_LRRN2	24
cg21028785_SERPINE3,INTS6	24
cg14251805_MVB12B	24
cg03308038_cg03308038_NA	24
cg21970438_cg21970438_NA	24
cg16736889_ACSM5	24
cg07024453_NOTCH4	24
cg05028948_cg05028948_NA	24
cg23916689_RUNX3	24
cg23610154_cg23610154_NA	24
cg06212258_cg06212258_NA	24
cg01032675_GNA15	24
cg03879160_cg03879160_NA	24
cg15649327_MYSM1	24
cg02696830_PGBD5	24
cg00427260_cg00427260_NA	24
cg06222397_cg06222397_NA	24
cg07554011_HRAS,LRRC56	24
cg16035777_MFSD4A	24
cg05891759_ILDR1	24
cg01654560_NTM	24
cg23843022_cg23843022_NA	24
cg08877148_PRICKLE2	24
cg24525952_MAD1L1	24
cg05592114_C1R,C1RL	24
cg06620200_cg06620200_NA	24
cg26495092_cg26495092_NA	24
cg13208333_INSC	24
cg14038949_PFKFB3	24
cg24083720_cg24083720_NA	24
cg01352906_cg01352906_NA	24
cg21526357_RAP1GAP2	24
cg19907483_RFX2	24
cg24768187_cg24768187_NA	24
cg05081144_RBM4B,SPTBN2	24
cg23030853_cg23030853_NA	24
cg04763519_GMDS,FOXC1	24
cg11668419_cg11668419_NA	24
cg02442640_SEPT9	24
cg10787442_GRINA	24
cg16770549_TAPBPL,VAMP1	24
cg02393107_MMEL1,FAM213B	24
cg03515897_cg03515897_NA	24
cg19860154_TSHZ1	24
cg11954030_MYO10	24
cg22825871_cg22825871_NA	24
cg24836242_cg24836242_NA	24
cg25929198_ANXA4,AAK1	24
cg20985587_ANKRD13B,SSH2,CORO6	24
cg25030049_cg25030049_NA	24
cg02297801_NADK,GNB1	24
cg26723635_STOX2	24
cg08006727_PRPF4	24
cg25311623_CNN3	24
cg06861519_cg06861519_NA	24
cg03421624_DGCR5	24
cg05785932_KCNMA1	24
cg21396517_VGLL4	24
cg02744705_DCLK2,LRBA	24
cg19485911_GMPPA	24
cg13798270_NACC2	24
cg14196998_CEBPB	24
cg21075986_cg21075986_NA	24
cg00000884_cg00000884_NA	24
cg26840062_cg26840062_NA	24
cg05938633_NXN	24
cg15751131_SLC37A3	24
cg16949584_CYP2E1,SPRN	24
cg06285340_CYP11A1	24
cg06399419_cg06399419_NA	24
cg24980709_cg24980709_NA	24
cg20288916_cg20288916_NA	24
cg25459301_XKR6	24
cg26259818_CACNA1E	24
cg07598357_LINC01624,DLL1,FAM120B	24
cg09346823_cg09346823_NA	24
cg12062672_RNF126,POLRMT	24
cg23903708_DNMT3A	24
cg02328578_cg02328578_NA	24
cg11669284_WDR70	24
cg07190914_cg07190914_NA	24
cg25263454_KLK14	24
cg02920604_MYO1E	24
cg00625351_cg00625351_NA	24
cg12487914_cg12487914_NA	23
cg16244648_cg16244648_NA	23
cg12658925_GFI1B	23
cg22478317_SH3RF3	23
cg14400768_PPARA	23
cg07441944_CD82	23
cg17605084_NCKAP1L	23
cg17491564_KRI1,CDKN2D	23
cg21057323_CDC42BPB	23
cg04917472_CTSZ	23
cg01567482_RGS14,LMAN2	23
cg13064679_cg13064679_NA	23
cg20515679_KCNJ6	23
cg02874908_CORO1B,PTPRCAP,RPS6KB2	23
cg26746255_cg26746255_NA	23
cg11723772_RNF220	23
cg12641739_cg12641739_NA	23
cg11610460_RNF43,SUPT4H1,TSPOAP1-AS1	23
cg26902647_cg26902647_NA	23
cg18802138_cg18802138_NA	23
cg14437551_cg14437551_NA	23
cg02691035_ACSF3	23
cg11791526_PPP1CA,TBC1D10C,CARNS1	23
cg17786659_GPR157	23
cg05109966_GMDS,FOXC1	23
cg23526087_RAD51B	23
cg08460812_LEF1	23
cg11433629_BCLAF1	23
cg15417249_cg15417249_NA	23
cg13790810_MSI2	23
cg26523175_PDZK1IP1	23
cg14970311_cg14970311_NA	23
cg08697251_LPCAT1	23
cg04815371_AKAP6	23
cg23196549_MCUB	23
cg26343116_cg26343116_NA	23
cg00585621_H2AFZ,DNAJB14	23
cg22459052_cg22459052_NA	23
cg05629821_ATP11A	23
cg21161568_COL27A1	23
cg11848483_ZC3H3	23
cg05620261_WTIP	23
cg22795331_DCBLD1,GOPC	23
cg07576135_CAPN3	23
cg03000848_AXIN1	23
cg20220678_SH2D4A	23
cg01188191_cg01188191_NA	23
cg01983504_MIR103A2,RNF24,PANK2	23
cg08445550_MYO10	23
cg08152065_GABRB3	23
cg13146553_RORA	23
cg25596287_SNHG3,SNORA73B,RCC1	23
cg06363968_COTL1	23
cg24251218_AMPD3	23
cg13880193_SCTR	23
cg14741236_cg14741236_NA	23
cg12166520_MIR99AHG	23
cg05078644_NALCN	23
cg24039149_ARHGEF16	23
cg23045972_cg23045972_NA	23
cg07243762_NCOR2	23
cg19380295_cg19380295_NA	23
cg16359424_cg16359424_NA	23
cg03622263_cg03622263_NA	23
cg02878222_ALG1,C16orf89	23
cg23117250_RAB40B	23
cg04169483_cg04169483_NA	23
cg04639421_HLA-DRA	23
cg05194808_COL6A1	23
cg18158306_FBRSL1	23
cg19728051_cg19728051_NA	23
cg07484739_cg07484739_NA	23
cg09788003_AHSA1	23
cg16618104_CHST11	23
cg07656173_PROM1	23
cg18363268_FOXN3	23
cg04103021_HAND2-AS1,HAND2	23
cg10877430_DTX1	23
cg26550874_SDK1	23
cg15770599_CMTM6	23
cg07713192_cg07713192_NA	23
cg11465943_cg11465943_NA	23
cg18664013_PTPRN2	23
cg21176127_WARS	23
cg02580262_LINC00910	23
cg25017584_cg25017584_NA	23
cg20062492_EGFR	23
cg06962867_PLCB1	23
cg06495803_TAPBPL,CD27,CD27-AS1	23
cg23951816_TCF7L2	23
cg10503610_KCNN3	23
cg15391116_cg15391116_NA	23
cg26927218_BAIAP2	23
cg21557108_ATP8B4	23
cg04945608_TTPAL,SERINC3	23
cg10256839_ST5	23
cg24639100_ORMDL2,TMEM198B,DNAJC14,MMP19	23
cg09726279_MYBBP1A	23
cg07918453_MEG9	23
cg06974135_PDE4D	23
cg11744817_RPS6KA2,RPS6KA2-IT1	23
cg15257719_MRPS22	23
cg25729166_LINGO1	23
cg03391776_RREB1	23
cg22014289_SH3RF3	23
cg22899502_DENND3	23
cg15264991_EMG1,PHB2	23
cg14406878_AGAP1	23
cg01233664_cg01233664_NA	23
cg19854901_ZMYND10,NPRL2,RASSF1	23
cg23908015_LINC00638	23
cg09457645_RAD51D	23
cg18524262_NEDD4L	23
cg15174682_KDM4B	23
cg08022819_SEZ6L2,CDIPT	23
cg23605670_NNAT,BLCAP	23
cg03701341_cg03701341_NA	23
cg18247172_cg18247172_NA	23
cg26244013_SCNN1A	23
cg07837852_cg07837852_NA	23
cg26271895_CRIM1	23
cg02385820_SIRT2,RINL	23
cg14008071_cg14008071_NA	23
cg01928068_C11orf96,ALKBH3-AS1,ALKBH3	23
cg11507187_CAMK2A	23
cg00548098_cg00548098_NA	23
cg13895650_TLE1	23
cg01500140_cg01500140_NA	23
cg15204354_DCST1,DCST2	23
cg17033087_cg17033087_NA	23
cg21010350_GIMAP5	23
cg01152072_cg01152072_NA	23
cg23057567_PPP5D1	23
cg12986110_PLA2G4C	23
cg18409985_ATP11A	23
cg04014586_KIF26B	23
cg00492362_MRPS5	23
cg11206634_WDR33	23
cg16888547_PDE1C	23
cg19469189_KCNJ5,C11orf45	23
cg01243773_PKNOX2	23
cg00284386_ARHGEF10	23
cg12720921_cg12720921_NA	23
cg05232118_LINC00607	23
cg05433111_CD19,RABEP2	23
cg17278355_ELFN1	23
cg13385644_BUD13	23
cg09879458_RORA	23
cg04703221_WWP2	23
cg25921502_C10orf128	23
cg24490227_cg24490227_NA	23
cg15001636_SMARCA4	23
cg22162097_cg22162097_NA	23
cg24977670_CTNND2	23
cg00427986_cg00427986_NA	23
cg09637885_SLC38A9	23
cg05668317_ADAMTS9-AS2,ADAMTS9	23
cg16002660_MNT,METTL16	23
cg12754854_LRRC8A,PHYHD1	23
cg26767544_ZNF609,OAZ2	23
cg06535498_NOTCH4	23
cg16989867_KIAA1549	23
cg19603100_cg19603100_NA	23
cg15931233_ARL15	23
cg02780017_SLC22A20,CAPN1	23
cg27064845_GLTSCR2,GLTSCR2-AS1,EHD2	23
cg02098313_THEMIS	23
cg02368508_cg02368508_NA	23
cg05138138_UXS1	23
cg06133061_DSCAML1	23
cg07405563_cg07405563_NA	23
cg18798445_PTPRQ	23
cg22633049_POFUT2	23
cg21767537_cg21767537_NA	23
cg14307300_cg14307300_NA	23
cg22035959_ARID3A	22
cg07581492_THRB	22
cg05762671_cg05762671_NA	22
cg01958481_cg01958481_NA	22
cg22991506_LINC01588	22
cg05083067_OR51E1	22
cg05280206_DUSP8	22
cg08763102_HTT	22
cg05350798_cg05350798_NA	22
cg03875496_cg03875496_NA	22
cg00456326_OSR1	22
cg11819201_cg11819201_NA	22
cg21229337_PI16,MTCH1	22
cg17680611_TPM4	22
cg04519775_cg04519775_NA	22
cg13445177_S100A10	22
cg04311403_EDARADD	22
cg24424889_APOBEC3H	22
cg03180953_IGFALS,SPSB3,HAGH,NUBP2	22
cg03114584_cg03114584_NA	22
cg12107247_cg12107247_NA	22
cg19988235_cg19988235_NA	22
cg07906179_cg07906179_NA	22
cg22236410_RRM1	22
cg00934087_PPM1G,FTH1P3	22
cg02295992_cg02295992_NA	22
cg21112099_COL12A1	22
cg00679763_SUMO2P17,UBE2Z	22
cg25944717_TRIM41	22
cg17245726_OVAAL	22
cg16725984_SPATA33	22
cg27596890_ZNF423	22
cg24447788_PTBP1	22
cg01571660_cg01571660_NA	22
cg21634628_BTD	22
cg01245268_RAP1GAP2	22
cg17501754_LSP1	22
cg23844904_cg23844904_NA	22
cg12523424_MAD1L1	22
cg06958535_LAX1	22
cg22775108_cg22775108_NA	22
cg07917062_C10orf11	22
cg03974204_HTRA1	22
cg14148016_cg14148016_NA	22
cg06787669_MYO1G,SNHG15	22
cg10761558_SSBP3	22
cg22117468_MXD1	22
cg21747070_cg21747070_NA	22
cg08857797_WNK4,VPS25	22
cg19871588_cg19871588_NA	22
cg04221117_CELF2	22
cg06080169_SCN11A	22
cg02798394_cg02798394_NA	22
cg22356061_SNAP47	22
cg06613515_PSTPIP1	22
cg09718071_cg09718071_NA	22
cg01940460_INPP1,HIBCH	22
cg19863740_PARVG,PARVB	22
cg04685253_PRR12	22
cg24999973_CAMTA1	22
cg12093936_cg12093936_NA	22
cg00647863_LRRK1	22
cg26647200_CCNF,ABCA17P	22
cg20689471_cg20689471_NA	22
cg21990700_C1RL,C1RL-AS1	22
cg23349326_TNS3	22
cg08144931_CPNE8	22
cg03738384_COTL1	22
cg09924848_LHPP,FAM53B	22
cg09287933_SYNGAP1,PHF1,CUTA	22
cg20460771_PTAFR,DNAJC8	22
cg00667298_cg00667298_NA	22
cg05970317_AUTS2	22
cg11702988_ATP11A	22
cg23013137_CHMP4A,TM9SF1,TSSK4,NEDD8	22
cg08462194_CUTA,SYNGAP1,PHF1	22
cg25610200_cg25610200_NA	22
cg12590902_ERI3	22
cg19316647_POU2AF1	22
cg10157558_RHOBTB1	22
cg10462961_cg10462961_NA	22
cg20213508_GNAS	22
cg21910196_RGS6	22
cg13451886_SLFN5	22
cg24733624_cg24733624_NA	22
cg24317086_LINC01578,CHD2	22
cg23089272_FSIP1	22
cg17184161_TBCD	22
cg06639053_SH2B3	22
cg08985282_MAD1L1	22
cg19303305_HTRA3	22
cg08266286_ADCY3	22
cg04457794_cg04457794_NA	22
cg05014568_RADIL	22
cg15220969_cg15220969_NA	22
cg05733104_SRGAP3	22
cg23912266_cg23912266_NA	22
cg25550753_TTC7A	22
cg16086570_cg16086570_NA	22
cg20933239_cg20933239_NA	22
cg03106207_DUSP2	22
cg03785755_HIST1H3D	22
cg08868213_ZNF385A	22
cg21615841_MCF2L	22
cg02713832_CD6	22
cg19977633_cg19977633_NA	22
cg07799106_cg07799106_NA	22
cg10767662_NFIX	22
cg01005536_RAB11FIP3	22
cg07813851_CAMTA1	22
cg11579059_MAP9	22
cg06872709_cg06872709_NA	22
cg16501892_LOXHD1	22
cg19263069_cg19263069_NA	22
cg17993419_RNF217	22
cg16779811_ERICH1	22
cg01215211_RAPGEF4	22
cg22309950_CD28	22
cg00283283_PCDHGB6,PCDHGA12,PCDHGA11,PCDHGB2,PCDHGA10,PCDHGA7,PCDHGB4,PCDHGA3,PCDHGA5,PCDHGC5,PCDHGB7,PCDHGB1,PCDHGA6,PCDHGA2,PCDHGA4,PCDHGA8,PCDHGB3,DIAPH1,PCDHGC4,PCDHGA1,PCDHGC3,PCDHGA9	22
cg14215711_PIP4K2A	22
cg10959999_SLCO2A1	22
cg14287022_AEBP2	22
cg06943385_GRB2	22
cg01724456_cg01724456_NA	22
cg13435432_OSTM1	22
cg13754915_TOR4A,NELFB	22
cg09061993_RCOR3,TRAF5	22
cg26725076_EP400NL,EP400	22
cg14572252_MECOM	22
cg05025332_cg05025332_NA	22
cg10382620_cg10382620_NA	22
cg16006965_C3orf52,SLC9C1,GCSAM	22
cg04404240_ZFP41	22
cg03684062_S1PR4,NCLN	22
cg14406134_COL27A1	22
cg15698795_PPP1CA,TBC1D10C,CARNS1	22
cg13909826_cg13909826_NA	22
cg08065963_USP7	22
cg07621825_cg07621825_NA	22
cg25648286_INPP5A	22
cg06653632_SLC15A4	22
cg15844419_COL18A1,COL18A1-AS1	22
cg14655843_UGCG	22
cg15863552_ST14	22
cg14007090_LAMA5	22
cg04690342_cg04690342_NA	22
cg21356630_cg21356630_NA	22
cg01948223_cg01948223_NA	22
cg20059682_SCN8A	22
cg04002480_TFR2,MOSPD3	22
cg03616573_cg03616573_NA	22
cg10193711_cg10193711_NA	22
cg09275291_cg09275291_NA	22
cg23024102_TSC22D1	22
cg19031047_cg19031047_NA	22
cg17355191_GBGT1,RALGDS	22
cg19618279_COASY,MLX,HSD17B1,PSMC3IP	22
cg16733670_KIAA0513	22
cg10474404_MBD4,EFCAB12	22
cg04793272_ABCG4	22
cg00967711_TMEM45A	22
cg23615488_cg23615488_NA	22
cg21433239_cg21433239_NA	22
cg08802358_FGFR4	22
cg08942191_ARNT2	22
cg09707814_cg09707814_NA	22
cg21814290_RP1L1	22
cg03511671_PPFIA4	22
cg26912105_TLDC1	22
cg12049093_cg12049093_NA	22
cg15892497_cg15892497_NA	22
cg27009556_PLCG2	22
cg14096899_cg14096899_NA	22
cg26464701_TRIM2	22
cg06639544_cg06639544_NA	22
cg27168033_EEF2	22
cg24182581_DLG2	22
cg04077795_GRIN2A	22
cg12750431_CXCL12	22
cg20279493_cg20279493_NA	22
cg09027725_COX4I2	22
cg04968473_cg04968473_NA	22
cg12207248_C3orf67	22
cg15378605_CHST15	22
cg13137032_cg13137032_NA	22
cg00694315_cg00694315_NA	22
cg06960700_RPS6KA2	22
cg20001810_cg20001810_NA	22
cg23158022_C19orf44	22
cg05430886_SMPD3	22
cg07017562_RTN1	22
cg26331247_C20orf203	22
cg11662745_PPP2R2B	22
cg00722081_cg00722081_NA	21
cg00260575_cg00260575_NA	21
cg12820310_DIRC3	21
cg11252555_RPS11,FLT3LG,RPL13A	21
cg14165142_CDC25B	21
cg05539509_cg05539509_NA	21
cg13334396_cg13334396_NA	21
cg01334831_RASA3	21
cg03819134_cg03819134_NA	21
cg07349899_GALNT18	21
cg07719674_cg07719674_NA	21
cg13151664_KALRN	21
cg14178364_FBXO10	21
cg02663352_CD44	21
cg26472802_PFKL	21
cg05388765_DDX28,DUS2	21
cg21999229_cg21999229_NA	21
cg09993145_RUNX3	21
cg19309341_LYL1,NFIX	21
cg18436709_B4GALNT3	21
cg07686035_SLC26A4,SLC26A4-AS1	21
cg10145196_cg10145196_NA	21
cg17841267_cg17841267_NA	21
cg19940482_PKNOX2	21
cg18247090_MTUS2,MTUS2-AS1	21
cg21026460_HDAC11	21
cg04638265_FAM107B	21
cg06746017_EML1	21
cg11640773_NDRG4,RNU6-103P	21
cg26757673_IL2RB	21
cg08223915_TMCO3	21
cg21587469_PYM1,DGKA	21
cg08822635_TULP3,RHNO1,FOXM1	21
cg11436362_GRK2,ANKRD13D	21
cg00754552_NAPSB,NR1H2	21
cg11572675_cg11572675_NA	21
cg01778864_KIAA1324	21
cg20638127_cg20638127_NA	21
cg12536891_CLPB	21
cg18014109_MRGPRF	21
cg24851249_CAMTA1	21
cg13214422_SYNPO,MYOZ3	21
cg11683482_DMAP1,ERI3	21
cg22579224_CEMIP,MESDC2	21
cg00178850_EDARADD	21
cg04912316_UBALD2,QRICH2	21
cg04716447_WDR66	21
cg08946618_GLB1L2	21
cg11592082_SYTL1,MAP3K6	21
cg09611620_FOXP1	21
cg09390241_SH3TC1	21
cg27617225_CPSF1,ADCK5	21
cg14212038_cg14212038_NA	21
cg01232037_cg01232037_NA	21
cg03961718_cg03961718_NA	21
cg00886770_MRPS31P5	21
cg23280720_HECA	21
cg21150026_cg21150026_NA	21
cg10334053_PRKCZ	21
cg24644097_RNF4	21
cg03254336_cg03254336_NA	21
cg16028012_SHC2	21
cg04278371_COL18A1,COL18A1-AS1	21
cg02039839_COX19	21
cg02824888_TBX3	21
cg11042505_cg11042505_NA	21
cg11381564_TAP1	21
cg01461211_cg01461211_NA	21
cg00424286_RPS6KA2,RPS6KA2-IT1	21
cg16576033_TOMM20	21
cg06501716_HIRA,UFD1L,C22orf39	21
cg00753676_KLF3-AS1,KLF3	21
cg10762511_SAP30BP,RECQL5	21
cg13898430_RUNX3	21
cg24121503_AKAP12	21
cg25310700_ASB13	21
cg04664897_P2RY2	21
cg27638288_cg27638288_NA	21
cg17102627_NFATC1	21
cg18517540_DTNA	21
cg21144988_CFAP97	21
cg00675600_cg00675600_NA	21
cg04659901_ALK	21
cg18961788_DIO3OS	21
cg24725931_C22orf34	21
cg05171693_GPER1,C7orf50	21
cg24314564_TPRG1,TPRG1-AS1	21
cg23636802_cg23636802_NA	21
cg10102102_cg10102102_NA	21
cg09761705_ITGB1BP1,ASAP2	21
cg18677812_SCN11A	21
cg03857640_SHCBP1	21
cg03742763_APOA1,APOA1-AS	21
cg05933789_cg05933789_NA	21
cg22182666_TSPOAP1-AS1,TSPOAP1	21
cg05281206_CCL13	21
cg20477259_cg20477259_NA	21
cg01670876_SYNDIG1L	21
cg07859439_PGAP1	21
cg07809166_cg07809166_NA	21
cg06971577_cg06971577_NA	21
cg25711246_GALNT8,KCNA6	21
cg08029287_cg08029287_NA	21
cg01690872_PLXNA4	21
cg09434536_cg09434536_NA	21
cg26848442_CD226	21
cg23010913_cg23010913_NA	21
cg01856892_BAIAP3	21
cg09033472_RASA3	21
cg11832281_CELF2	21
cg10274029_cg10274029_NA	21
cg03718241_cg03718241_NA	21
cg01502320_cg01502320_NA	21
cg20454073_NFIX	21
cg25366155_LRP5	21
cg03123557_KCNE1	21
cg10817441_TAP1	21
cg19171919_cg19171919_NA	21
cg19627093_ARHGEF10	21
cg22398259_cg22398259_NA	21
cg13447080_ASAP1	21
cg14409507_PARVB,SAMM50	21
cg26912602_cg26912602_NA	21
cg00572560_cg00572560_NA	21
cg12432155_STOX2	21
cg04314225_PCNT	21
cg20849025_DTX4,MPEG1	21
cg08554440_cg08554440_NA	21
cg08579540_cg08579540_NA	21
cg17178126_cg17178126_NA	21
cg20556803_MAD1L1	21
cg26494044_PTPRE	21
cg16529548_CREG2	21
cg21167335_cg21167335_NA	21
cg15357821_UNC5A,HK3	21
cg07924081_PPP1R13L	21
cg18880384_cg18880384_NA	21
cg09967834_HEATR6,WFDC21P	21
cg09174162_MAD1L1	21
cg11209447_SCNN1A,LTBR	21
cg22670630_cg22670630_NA	21
cg27457191_PHTF2,TMEM60	21
cg06704573_cg06704573_NA	21
cg10512535_TXNDC5	21
cg04464719_P2RX1,ATP2A3	21
cg24068815_BDKRB2	21
cg23296652_cg23296652_NA	21
cg04367093_cg04367093_NA	21
cg13863076_PARVB,SAMM50	21
cg10959672_KIAA0319L	21
cg03357721_ARHGEF7	21
cg13515808_LOXL4	21
cg23088551_PPAN,P2RY11,EIF3G	21
cg09157008_ADIPOR1	21
cg25962840_PSD4	21
cg27022558_RPS6KA4	21
cg02086820_ZC3H18	21
cg03176550_LAT,SPNS1	21
cg18297960_GPER1,C7orf50	21
cg25576655_cg25576655_NA	21
cg14391148_TOR4A,NELFB	21
cg10082313_cg10082313_NA	21
cg22595443_FRMD4A	21
cg19780829_FUT8	21
cg20995188_UXS1	21
cg12065442_TRIM17,TRIM11	21
cg06112171_cg06112171_NA	21
cg09659400_cg09659400_NA	21
cg11780042_cg11780042_NA	21
cg15226808_RNF217,RNF217-AS1	21
cg00328720_EXTL3,EXTL3-AS1	21
cg12697833_OPCML	21
cg16869862_ACOX2	21
cg10950524_MAD1L1	21
cg02280599_cg02280599_NA	21
cg13580827_APBA1	21
cg14565120_cg14565120_NA	21
cg08701543_KCNIP1	21
cg25071602_cg25071602_NA	21
cg03610228_SKIDA1	21
cg04239353_SPATA33	21
cg16210395_CGNL1	21
cg16274899_PLEKHG3	21
cg02547724_cg02547724_NA	21
cg22903402_MYO7B	21
cg08315421_cg08315421_NA	21
cg23026930_cg23026930_NA	21
cg04125710_CETP	21
cg02711579_cg02711579_NA	21
cg00753399_MOB1A	21
cg00547530_CLUAP1	21
cg11459133_cg11459133_NA	21
cg13967810_SMARCA2	21
cg04902327_TRIM58	21
cg03536404_ITSN2	21
cg20414618_CASC15	21
cg19077794_cg19077794_NA	21
cg16799805_PODNL1,RFX1,DCAF15	21
cg25367999_cg25367999_NA	21
cg14080448_cg14080448_NA	21
cg07746282_RANGAP1,CHADL	21
cg07392740_KCTD2,TRIM80P	21
cg01515515_cg01515515_NA	21
cg15151492_PTCHD4	21
cg00103209_RBBP5,TMEM81,CNTN2	21
cg14615152_CSMD2	21
cg03703733_cg03703733_NA	21
cg19620383_RORA,RORA-AS1	21
cg27304332_SORCS2	21
cg14468932_cg14468932_NA	21
cg11122009_AXIN2	21
cg14630001_cg14630001_NA	20
cg24980995_DIRC3	20
cg01569601_cg01569601_NA	20
cg14372472_cg14372472_NA	20
cg00386035_PDE10A	20
cg02003272_DLEU2,DLEU1	20
cg14232091_VPS52,RPS18	20
cg20212364_EMCN	20
cg20991819_TGFB2	20
cg03214420_SMG9	20
cg22229470_cg22229470_NA	20
cg15208672_TMCO3	20
cg04503182_SFMBT1	20
cg13156207_PLB1	20
cg18611122_CERS2,ANXA9	20
cg25247520_PVT1	20
cg07005960_METRNL	20
cg06250720_cg06250720_NA	20
cg26191422_cg26191422_NA	20
cg13832290_ARHGEF39,CCDC107,CD72,SIT1	20
cg07929642_ANKRD11	20
cg17434901_cg17434901_NA	20
cg24665265_cg24665265_NA	20
cg11183935_TBCD	20
cg11358199_cg11358199_NA	20
cg03573679_CHST12	20
cg13089904_cg13089904_NA	20
cg23660949_BAIAP2	20
cg10133953_cg10133953_NA	20
cg01780943_TRAF5,RCOR3	20
cg11802899_cg11802899_NA	20
cg16269775_S100A4,S100A3,S100A6	20
cg00686926_cg00686926_NA	20
cg01203812_PRDM16	20
cg02389091_cg02389091_NA	20
cg12535569_PTPRCAP,RPS6KB2,CORO1B	20
cg13603599_AIP,PITPNM1	20
cg06094203_COL9A3,TCFL5	20
cg08420572_NFIX	20
cg12413156_LIME1,ZGPAT,ZBTB46,SLC2A4RG	20
cg20491695_cg20491695_NA	20
cg18129046_ARSJ	20
cg00954161_RN7SL574P,CCDC27,SMIM1,LRRC47	20
cg14010720_PTK6	20
cg24755459_cg24755459_NA	20
cg00830621_RPS15A,ARL6IP1	20
cg12004641_TNS1	20
cg25477843_GRINA	20
cg14417896_cg14417896_NA	20
cg23325364_DIP2C	20
cg18990407_EPHB3,EIF2B5	20
cg23510807_BRAT1,LFNG	20
cg19233405_DCST2,ZBTB7B	20
cg23664361_TPPP2,NDRG2,RNASE7	20
cg27252325_DNAJC22	20
cg07996532_ECE1	20
cg07533239_PLEKHG6	20
cg02193425_FAM50B	20
cg12608775_TRIM66	20
cg08315613_SMARCA4	20
cg25033076_GNAL,MPPE1	20
cg16202093_CFAP46	20
cg24890964_BLCAP,NNAT	20
cg06796611_IL24,FCMR	20
cg18428006_PHYKPL,HNRNPAB	20
cg16796959_GRINA	20
cg09861240_GGA1,SH3BP1	20
cg14868222_cg14868222_NA	20
cg14042635_STAT5A	20
cg01869288_cg01869288_NA	20
cg10144751_IFT140	20
cg10746278_cg10746278_NA	20
cg20666585_cg20666585_NA	20
cg12434856_cg12434856_NA	20
cg02823132_PIEZO1	20
cg27155939_SRP14-AS1	20
cg26399994_PTPRC	20
cg09762242_SIPA1,PCNX3	20
cg22335223_FXYD6,FXYD2	20
cg20968717_ALDH1A2,LIPC	20
cg25491402_PDE9A	20
cg05775517_FAM174B	20
cg12258847_ERN1	20
cg23273316_NCKAP5	20
cg00517080_NCAPD3,VPS26B	20
cg18183941_NLRP3	20
cg11947782_PIK3CD	20
cg04499701_POU2AF1	20
cg00737208_ZNF594	20
cg26165146_STK38L,ARNTL2	20
cg24725246_FOXN3	20
cg11166287_cg11166287_NA	20
cg16834212_SUCLG2-AS1,SUCLG2	20
cg13112407_ARID5A	20
cg02231590_ITM2C	20
cg09117673_cg09117673_NA	20
cg05952498_cg05952498_NA	20
cg08490107_SH3PXD2B	20
cg05287437_GALNT15	20
cg04722215_ARID5A	20
cg07078108_cg07078108_NA	20
cg25392995_TRABD,PANX2	20
cg17301053_RPS6KA2	20
cg05206276_KIAA1683,JUND	20
cg10177528_TRAF5,RCOR3	20
cg14938587_cg14938587_NA	20
cg05099708_CBFA2T3	20
cg01553231_cg01553231_NA	20
cg22111043_MYO1G,SNHG15	20
cg23072161_EPHA2	20
cg18367124_cg18367124_NA	20
cg25424525_OTUD4	20
cg17433546_TMEM263	20
cg01448132_LAT,SPNS1	20
cg26112457_APOB	20
cg10575367_SRRM2-AS1,SRRM2	20
cg06813419_TRAF5	20
cg10092779_C1orf168	20
cg13450057_POLN,HAUS3	20
cg21775463_cg21775463_NA	20
cg19677267_UBXN11,CD52	20
cg08894487_ARID3A	20
cg22245446_DIRC3	20
cg22217449_PCNT	20
cg13126206_TNFRSF10B	20
cg06539411_TMEM135	20
cg02078710_cg02078710_NA	20
cg14136372_NPDC1,ENTPD2	20
cg13049261_SETD3	20
cg27068143_HTR2A	20
cg15454110_CUTA,SYNGAP1,PHF1	20
cg04409030_SOCS2-AS1,SOCS2	20
cg14604066_AGPAT2	20
cg05867499_RADIL	20
cg26676129_TLDC1	20
cg10636246_AIM2	20
cg08745334_TACC3	20
cg23896695_PVT1	20
cg26898567_TMEM220-AS1,TMEM220	20
cg19375539_WDPCP	20
cg08525461_cg08525461_NA	20
cg18080733_MCF2L,MCF2L-AS1	20
cg04031411_DEXI,CLEC16A	20
cg04305440_cg04305440_NA	20
cg23678364_CYTL1	20
cg00133403_FAM192A,RSPRY1	20
cg11503710_ZNF365	20
cg25341313_cg25341313_NA	20
cg06122697_CYP26B1	20
cg18247179_C22orf39,UFD1L,HIRA	20
cg05030351_cg05030351_NA	20
cg10111335_cg10111335_NA	20
cg22696426_RGS10	20
cg13439189_LINC00484	20
cg00146027_ITGB1	20
cg00598394_SOCS2-AS1,SOCS2	20
cg22787191_KIF26B	20
cg05404091_LRCOL1	20
cg10134939_EVA1A	20
cg01878761_DSCAML1	20
cg15721134_cg15721134_NA	20
cg02926307_NUAK1	20
cg01198994_MXRA8,DVL1	20
cg06321045_PSORS1C1	20
cg21368566_AGAP1	20
cg14215105_INTS3	20
cg06538345_FLT3LG,RPL13A,RPS11	20
cg21486834_RHBDF2	20
cg02664479_TCEA2,SOX18	20
cg08046030_RNGTT	20
cg22376758_SERPINB9	20
cg13440692_FAM132A,UBE2J2	20
cg05973398_RUNX1	20
cg14770389_cg14770389_NA	20
cg15033552_CAPN2	20
cg08419450_cg08419450_NA	20
cg02455383_CRYBB1	20
cg14711067_LGALS2	20
cg24543596_RAB13,RPS27,JTB	20
cg21878385_FIP1L1,LNX1	20
cg25567054_cg25567054_NA	20
cg00750307_THAP11,NUTF2,CENPT	20
cg23314514_cg23314514_NA	20
cg13068653_TAGLN,PCSK7,SIDT2	20
cg05106502_SKAP1	20
cg19448144_NOTCH4	20
cg09945896_ABCA3	20
cg09149784_SEPN1	20
cg14136260_UCP3	20
cg26988213_KCP,FLNC,ATP6V1F	20
cg05295696_cg05295696_NA	20
cg27406091_FAM20C	20
cg06332269_BTBD2,CSNK1G2	20
cg13482327_cg13482327_NA	20
cg01143547_CCND3,BYSL	20
cg27125093_S1PR4,NCLN	20
cg15884992_cg15884992_NA	20
cg26327040_ADGRD1	20
cg11712506_KCNN2	20
cg10110604_cg10110604_NA	20
cg14182820_SNORD116-6,SNORD116-12,SNHG14	20
cg22531371_TRIM46,MUC1,THBS3	20
cg18875357_PLD4	20
cg02006426_cg02006426_NA	20
cg00834536_ADCY9	20
cg04106630_TIMP2	20
cg04579254_SP110,SP140	20
cg20662985_KMT2C	20
cg18984200_STON1	20
cg23719342_cg23719342_NA	20
cg03169242_cg03169242_NA	20
cg14823740_SYNGAP1,CUTA,PHF1	20
cg17109704_ADAM8,TUBGCP2	20
cg24298696_PRDM16	20
cg01811583_EML1	20
cg25506915_EIF3G,PPAN,P2RY11	20
cg27304729_C19orf12	20
cg23824010_TMEM165,SRD5A3-AS1	20
cg19583076_RPS19,ARHGEF1	20
cg15820432_cg15820432_NA	20
cg20712054_LRP3,SLC7A10	20
cg05418719_NOG	20
cg18476690_CYB561A3,TMEM138,TKFC	20
cg05206657_cg05206657_NA	20
cg20644554_MIPEP	20
cg01018492_cg01018492_NA	20
cg05446923_cg05446923_NA	20
cg11345703_SYT7	20
cg24699005_STK11	20
cg08372135_SNRPN,SNURF	20
cg18030943_LAMP3	20
cg15958828_FOXP1	20
cg01087239_KIAA1683,JUND	20
cg02911270_AGO2	20
cg09913413_WHSC1	20
cg08962305_TDGF1,LRRC2	20
cg02068351_STX7	20
cg18464364_TCF7L2	20
cg10949499_MYH6	20
cg06704002_LINC01237	20
cg01378158_SLC9A5,PLEKHG4	20
cg13245440_NBL1	20
cg04943586_RFX4	20
cg20095398_cg20095398_NA	20
cg08447520_DTX1	20
cg06738169_POP4	20
cg05944661_ACOT7	20
cg05342138_OLFML1,PPFIBP2	20
cg15776647_CLDN11	20
cg06770995_cg06770995_NA	20
cg00290340_IGDCC3	20
cg17299331_ANTXR1	20
cg16143997_cg16143997_NA	20
cg15872458_ZNF385A,ITGA5	20
cg03564228_cg03564228_NA	20
cg24935810_TRPV3	20
cg06519367_cg06519367_NA	20
cg27242911_MICU1	20
cg15411447_cg15411447_NA	20
cg06483575_ZNF343	20
cg23942508_cg23942508_NA	20
cg02638523_AGAP1	20
cg00581541_PUM1	20
cg06647068_CHST11	20
cg22553722_A1BG-AS1,ZSCAN22,A1BG	20
cg12655768_F2RL2,IQGAP2	20
cg08118354_cg08118354_NA	20
cg01874152_TESPA1	20
cg24045212_MAD1L1	20
cg00695265_BAIAP2L1	20
cg00088885_SPP1	20
cg22044669_cg22044669_NA	20
cg13714026_CDH23	20
cg21610556_cg21610556_NA	20
cg08105844_SLC26A6	20
cg03608093_EPS8L2,DEAF1,TMEM80	20
cg09623018_cg09623018_NA	20
cg06129544_SMIM20	20
cg21669966_TRERF1	20
cg24670927_HACD3	20
cg24754199_DIP2C	20
cg24679124_BSN	20
cg25376310_ZDHHC14	20
cg11789321_cg11789321_NA	20
cg22512888_B3GALT6,FAM132A	20
cg08224238_cg08224238_NA	20
cg15919924_KLHDC10	20
cg25270574_SSH1	20
cg23973885_MXRA8	19
cg11888747_OGG1,TADA3	19
cg08527313_PTPRU	19
cg05103064_SFMBT2	19
cg13066703_TRAF5	19
cg08734090_C10orf105,CDH23	19
cg12433559_PRF1	19
cg03225003_NPHP4	19
cg16137564_PTPN21,ZC3H14	19
cg09743596_ACSF3	19
cg07706695_KCNA2	19
cg10460946_cg10460946_NA	19
cg03545404_CDX1	19
cg01815720_cg01815720_NA	19
cg17112382_cg17112382_NA	19
cg05222958_CLEC11A,SHANK1	19
cg10811945_NTRK1,SH2D2A	19
cg00057722_ZBTB7C	19
cg12743031_PTK2B	19
cg09386807_NPRL2,ZMYND10,RASSF1	19
cg05279172_ACADVL,DLG4	19
cg00859858_LINC01137,ZC3H12A	19
cg10494615_GTF3C2,EIF2B4,SNX17	19
cg02422603_RASA3	19
cg00209786_cg00209786_NA	19
cg03234557_TSPAN5	19
cg02578462_MAD1L1	19
cg26665035_SLC22A18,SLC22A18AS	19
cg24610854_LYRM7,HINT1	19
cg22322679_RPS18,VPS52	19
cg17661135_NRG1	19
cg25155064_JAML,MPZL3	19
cg10962223_cg10962223_NA	19
cg02787852_IL21R	19
cg24476449_KSR1	19
cg09093656_TRPV2	19
cg03392965_FAM188B,AQP1	19
cg09938443_ZDHHC7	19
cg19604323_cg19604323_NA	19
cg20832020_TIGIT	19
cg00753748_cg00753748_NA	19
cg12326965_BIRC5	19
cg09115713_PIEZO1	19
cg15429179_APLP2	19
cg03680790_STX2	19
cg03278514_cg03278514_NA	19
cg25548328_BLVRA	19
cg03287108_TAF12	19
cg13429095_MAPKAPK2	19
cg25743622_SUSD4	19
cg13164814_CDC42BPB	19
cg16886414_RPTOR	19
cg17387903_cg17387903_NA	19
cg02026204_cg02026204_NA	19
cg18273417_S100A6,S100A4,S100A3	19
cg11860434_ORAI2	19
cg25666403_cg25666403_NA	19
cg14716323_cg14716323_NA	19
cg04265972_CBFA2T3	19
cg06887580_cg06887580_NA	19
cg11301670_RNASET2	19
cg01838728_DPH6-AS1	19
cg11236515_DGUOK-AS1	19
cg19268695_DENND2D,CHI3L2	19
cg01372811_cg01372811_NA	19
cg07826859_SNHG15,MYO1G	19
cg15925478_BCAR3	19
cg14597739_cg14597739_NA	19
cg26363363_ATN1,C12orf57	19
cg07813495_ZC3H12A,LINC01137	19
cg13619891_cg13619891_NA	19
cg11807829_LNX1,FIP1L1	19
cg16896911_PEPD	19
cg16273051_EFCAB12	19
cg13578303_TEAD2,CD37	19
cg07370352_KAZN	19
cg10523494_CD300C,CD300LB	19
cg07293406_cg07293406_NA	19
cg01797899_cg01797899_NA	19
cg14441276_cg14441276_NA	19
cg12229979_HAUS8,MYO9B	19
cg19456938_TIGIT	19
cg13614617_IGDCC3	19
cg02795981_ZMIZ1	19
cg19280572_LSP1	19
cg12192582_ELMO1	19
cg24392577_LTBP3,SCYL1	19
cg02117102_HSPG2	19
cg23525051_RASGRP1	19
cg11432797_QPRT,SPN	19
cg22021794_cg22021794_NA	19
cg00491577_NCOA1	19
cg14909495_AOC1	19
cg08998657_cg08998657_NA	19
cg02597698_cg02597698_NA	19
cg19872095_ZC3H12A,LINC01137	19
cg20338276_GGA3	19
cg12275370_cg12275370_NA	19
cg07337385_MYOZ3,SYNPO	19
cg27583010_CORO1A	19
cg13873324_THEMIS2	19
cg24143221_HSPA1A	19
cg23056923_CDH23,C10orf105,C10orf54	19
cg19765175_PRR26,DIP2C	19
cg24420089_PTDSS2	19
cg06640822_RUNX3	19
cg06987246_ZNF853	19
cg11261261_DOCK1	19
cg07965566_NUMB	19
cg24068972_cg24068972_NA	19
cg11766468_EVI5L	19
cg13792279_cg13792279_NA	19
cg12800105_cg12800105_NA	19
cg06618097_PNMAL2,PPP5D1	19
cg04222297_TRAPPC9	19
cg26102819_HEG1	19
cg11977716_NFATC1	19
cg26536999_cg26536999_NA	19
cg17818435_SOAT2,IGFBP6	19
cg18659248_cg18659248_NA	19
cg21392204_NBEA	19
cg12655059_ZNF496	19
cg14091840_cg14091840_NA	19
cg03185794_GGACT	19
cg03737367_RPS11,RPL13A,FCGRT	19
[truncated: 11,322 more rows]

## Sheet: LF5_node_degree
feature	degree
ENSG00000130560_UBAC1	10825
ENSG00000108528_SLC25A11	10700
ENSG00000164050_PLXNB1	10664
ENSG00000130821_SLC6A8	10578
ENSG00000105552_BCAT2	10568
ENSG00000130159_ECSIT	10427
ENSG00000145916_RMND5B	10415
ENSG00000167874_TMEM88	10280
ENSG00000105341_DMAC2	10250
ENSG00000103507_BCKDK	10235
ENSG00000181991_MRPS11	10228
ENSG00000278619_MRM1	10191
ENSG00000167792_NDUFV1	10130
ENSG00000186815_TPCN1	10130
ENSG00000179091_CYC1	10116
ENSG00000136270_TBRG4	10013
ENSG00000101940_WDR13	10002
ENSG00000144647_POMGNT2	9857
ENSG00000185813_PCYT2	9818
ENSG00000171953_ATPAF2	9803
ENSG00000090097_PCBP4	9744
ENSG00000150281_CTF1	9687
ENSG00000250479_CHCHD10	9662
ENSG00000142082_SIRT3	9658
ENSG00000117266_CDK18	9639
ENSG00000130725_UBE2M	9626
ENSG00000069998_HDHD5	9584
ENSG00000163517_HDAC11	9487
ENSG00000139914_FITM1	9443
ENSG00000106992_AK1	9436
ENSG00000181856_SLC2A4	9427
ENSG00000089693_MLF2	9392
ENSG00000082014_SMARCD3	9382
ENSG00000160111_CPAMD8	9375
ENSG00000006704_GTF2IRD1	9329
ENSG00000106628_POLD2	9317
ENSG00000130193_THEM6	9303
ENSG00000134571_MYBPC3	9296
ENSG00000085998_POMGNT1	9258
ENSG00000066136_NFYC	9220
ENSG00000129245_FXR2	9210
ENSG00000198925_ATG9A	9204
ENSG00000174669_SLC29A2	9156
ENSG00000140474_ULK3	9134
ENSG00000101400_SNTA1	9122
ENSG00000115694_STK25	9120
ENSG00000091542_ALKBH5	9100
ENSG00000117419_ERI3	9087
ENSG00000138867_GUCD1	9073
ENSG00000179284_DAND5	9071
ENSG00000178585_CTNNBIP1	9056
ENSG00000183134_PTGDR2	9049
ENSG00000134463_ECHDC3	9047
ENSG00000099875_MKNK2	9042
ENSG00000101473_ACOT8	9036
ENSG00000079999_KEAP1	9033
ENSG00000054148_PHPT1	8987
ENSG00000103343_ZNF174	8981
ENSG00000101331_CCM2L	8977
ENSG00000102125_TAZ	8966
ENSG00000178952_TUFM	8963
ENSG00000105649_RAB3A	8954
ENSG00000137103_TMEM8B	8940
ENSG00000158286_RNF207	8935
ENSG00000176946_THAP4	8926
ENSG00000119723_COQ6	8908
ENSG00000103710_RASL12	8877
ENSG00000104879_CKM	8852
ENSG00000105197_TIMM50	8768
ENSG00000004142_POLDIP2	8763
ENSG00000215218_UBE2QL1	8757
ENSG00000126457_PRMT1	8748
ENSG00000114923_SLC4A3	8744
ENSG00000150967_ABCB9	8736
ENSG00000011347_SYT7	8714
ENSG00000129194_SOX15	8708
ENSG00000122367_LDB3	8679
ENSG00000167964_RAB26	8666
ENSG00000011485_PPP5C	8666
ENSG00000114378_HYAL1	8663
ENSG00000168734_PKIG	8634
ENSG00000100116_GCAT	8628
ENSG00000167363_FN3K	8581
ENSG00000159423_ALDH4A1	8573
ENSG00000042286_AIFM2	8565
ENSG00000141568_FOXK2	8564
ENSG00000135617_PRADC1	8549
ENSG00000124615_MOCS1	8525
ENSG00000112651_MRPL2	8506
ENSG00000185000_DGAT1	8466
ENSG00000221890_NPTXR	8462
ENSG00000088543_C3orf18	8456
ENSG00000130307_USHBP1	8451
ENSG00000122547_EEPD1	8425
ENSG00000119333_WDR34	8421
ENSG00000140986_RPL3L	8410
ENSG00000127527_EPS15L1	8386
ENSG00000036672_USP2	8366
ENSG00000187713_TMEM203	8357
ENSG00000197879_MYO1C	8356
ENSG00000188338_SLC38A3	8353
ENSG00000270885_RASL10B	8352
ENSG00000101210_EEF1A2	8318
ENSG00000153531_ADPRHL1	8290
ENSG00000159111_MRPL10	8282
ENSG00000205643_CDPF1	8272
ENSG00000137312_FLOT1	8266
ENSG00000162755_KLHDC9	8259
ENSG00000149925_ALDOA	8247
ENSG00000148343_MIGA2	8245
ENSG00000168569_TMEM223	8236
ENSG00000166311_SMPD1	8232
ENSG00000204564_C6orf136	8227
ENSG00000164967_RPP25L	8204
ENSG00000100321_SYNGR1	8203
ENSG00000171097_KYAT1	8187
ENSG00000177854_TMEM187	8162
ENSG00000102178_UBL4A	8159
ENSG00000067221_STOML1	8149
ENSG00000105607_GCDH	8124
ENSG00000119383_PTPA	8106
ENSG00000169738_DCXR	8100
ENSG00000134590_RTL8C	8096
ENSG00000129991_TNNI3	8087
ENSG00000126351_THRA	8066
ENSG00000110801_PSMD9	8052
ENSG00000068120_COASY	8044
ENSG00000022840_RNF10	8032
ENSG00000168936_TMEM129	8013
ENSG00000203950_RTL8A	7945
ENSG00000179262_RAD23A	7935
ENSG00000090621_PABPC4	7925
ENSG00000130204_TOMM40	7925
ENSG00000141026_MED9	7922
ENSG00000126934_MAP2K2	7916
ENSG00000159685_CHCHD6	7909
ENSG00000167113_COQ4	7904
ENSG00000151502_VPS26B	7896
ENSG00000104823_ECH1	7893
ENSG00000277494_GPIHBP1	7884
ENSG00000161714_PLCD3	7870
ENSG00000105518_TMEM205	7859
ENSG00000176463_SLCO3A1	7848
ENSG00000142186_SCYL1	7847
ENSG00000135924_DNAJB2	7833
ENSG00000099817_POLR2E	7814
ENSG00000165688_PMPCA	7797
ENSG00000167114_SLC27A4	7784
ENSG00000148308_GTF3C5	7767
ENSG00000115073_ACTR1B	7765
ENSG00000161267_BDH1	7763
ENSG00000132881_RSG1	7749
ENSG00000271401_AC010680.5	7746
ENSG00000102225_CDK16	7740
ENSG00000160678_S100A1	7739
ENSG00000141295_SCRN2	7738
ENSG00000111077_TNS2	7734
ENSG00000068354_TBC1D25	7692
ENSG00000117245_KIF17	7669
ENSG00000115042_FAHD2A	7667
ENSG00000166313_APBB1	7665
ENSG00000112561_TFEB	7663
ENSG00000126062_TMEM115	7660
ENSG00000116221_MRPL37	7648
ENSG00000165458_INPPL1	7645
ENSG00000171574_ZNF584	7616
ENSG00000254858_MPV17L2	7607
ENSG00000102119_EMD	7604
ENSG00000104812_GYS1	7599
ENSG00000065029_ZNF76	7599
ENSG00000125744_RTN2	7595
ENSG00000189077_TMEM120A	7590
ENSG00000107821_KAZALD1	7588
ENSG00000131095_GFAP	7582
ENSG00000160445_ZER1	7582
ENSG00000162104_ADCY9	7579
ENSG00000103510_KAT8	7545
ENSG00000277972_CISD3	7537
ENSG00000167965_MLST8	7524
ENSG00000137070_IL11RA	7524
ENSG00000112511_PHF1	7523
ENSG00000177646_ACAD9	7514
ENSG00000253389_AC113133.1	7507
ENSG00000164896_FASTK	7499
ENSG00000105379_ETFB	7479
ENSG00000127054_INTS11	7479
ENSG00000176894_PXMP2	7461
ENSG00000204463_BAG6	7455
ENSG00000182446_NPLOC4	7451
ENSG00000174917_C19orf70	7448
ENSG00000105258_POLR2I	7440
ENSG00000132275_RRP8	7435
ENSG00000088808_PPP1R13B	7435
ENSG00000183597_TANGO2	7429
ENSG00000103245_NARFL	7421
ENSG00000063854_HAGH	7411
ENSG00000183207_RUVBL2	7405
ENSG00000130731_METTL26	7392
ENSG00000177000_MTHFR	7361
ENSG00000143224_PPOX	7338
ENSG00000143258_USP21	7336
ENSG00000105676_ARMC6	7330
ENSG00000038532_CLEC16A	7279
ENSG00000086015_MAST2	7277
ENSG00000169727_GPS1	7248
ENSG00000095059_DHPS	7247
ENSG00000175662_TOM1L2	7230
ENSG00000108344_PSMD3	7152
ENSG00000104946_TBC1D17	7151
ENSG00000182208_MOB2	7151
ENSG00000167468_GPX4	7145
ENSG00000138073_PREB	7145
ENSG00000099341_PSMD8	7144
ENSG00000060971_ACAA1	7135
ENSG00000132612_VPS4A	7118
ENSG00000178026_LRRC75B	7113
ENSG00000067829_IDH3G	7109
ENSG00000175287_PHYHD1	7105
ENSG00000178188_SH2B1	7083
ENSG00000108262_GIT1	7074
ENSG00000100151_PICK1	7073
ENSG00000128311_TST	7066
ENSG00000066056_TIE1	7061
ENSG00000103502_CDIPT	7058
ENSG00000126106_TMEM53	7052
ENSG00000142655_PEX14	7041
ENSG00000167815_PRDX2	7040
ENSG00000110987_BCL7A	7012
ENSG00000132376_INPP5K	7008
ENSG00000156990_RPUSD3	6978
ENSG00000167508_MVD	6970
ENSG00000105568_PPP2R1A	6964
ENSG00000183580_FBXL7	6951
ENSG00000160285_LSS	6934
ENSG00000173011_TADA2B	6905
ENSG00000114650_SCAP	6901
ENSG00000019485_PRDM11	6901
ENSG00000116604_MEF2D	6891
ENSG00000176909_MAMSTR	6888
ENSG00000162714_ZNF496	6887
ENSG00000175826_CTDNEP1	6886
ENSG00000133424_LARGE1	6880
ENSG00000103197_TSC2	6880
ENSG00000179115_FARSA	6878
ENSG00000204227_RING1	6863
ENSG00000105698_USF2	6849
ENSG00000197586_ENTPD6	6847
ENSG00000132471_WBP2	6843
ENSG00000111652_COPS7A	6836
ENSG00000127884_ECHS1	6814
ENSG00000105072_C19orf44	6806
ENSG00000127554_GFER	6798
ENSG00000231584_FAHD2CP	6784
ENSG00000004975_DVL2	6783
ENSG00000040487_PQLC2	6750
ENSG00000105221_AKT2	6749
ENSG00000167632_TRAPPC9	6745
ENSG00000030110_BAK1	6717
ENSG00000124067_SLC12A4	6701
ENSG00000132740_IGHMBP2	6681
ENSG00000213995_NAXD	6673
ENSG00000114738_MAPKAPK3	6652
ENSG00000121653_MAPK8IP1	6648
ENSG00000161277_THAP8	6637
ENSG00000108523_RNF167	6633
ENSG00000064601_CTSA	6617
ENSG00000176533_GNG7	6595
ENSG00000053371_AKR7A2	6579
ENSG00000167771_RCOR2	6568
ENSG00000101189_MRGBP	6566
ENSG00000137207_YIPF3	6556
ENSG00000007047_MARK4	6547
ENSG00000167770_OTUB1	6544
ENSG00000148341_SH3GLB2	6521
ENSG00000124257_NEURL2	6509
ENSG00000106608_URGCP	6505
ENSG00000130726_TRIM28	6504
ENSG00000125611_CHCHD5	6502
ENSG00000137216_TMEM63B	6499
ENSG00000105401_CDC37	6497
ENSG00000122359_ANXA11	6497
ENSG00000137309_HMGA1	6476
ENSG00000135469_COQ10A	6474
ENSG00000074416_MGLL	6474
ENSG00000137106_GRHPR	6464
ENSG00000100413_POLR3H	6462
ENSG00000114767_RRP9	6438
ENSG00000126768_TIMM17B	6437
ENSG00000116649_SRM	6412
ENSG00000127903_ZNF835	6408
ENSG00000159761_C16orf86	6397
ENSG00000108840_HDAC5	6394
ENSG00000185043_CIB1	6389
ENSG00000162889_MAPKAPK2	6387
ENSG00000166228_PCBD1	6378
ENSG00000103202_NME4	6366
ENSG00000157613_CREB3L1	6357
ENSG00000149582_TMEM25	6351
ENSG00000116786_PLEKHM2	6346
ENSG00000130714_POMT1	6340
ENSG00000132128_LRRC41	6334
ENSG00000125843_AP5S1	6325
ENSG00000048140_TSPAN17	6324
ENSG00000100075_SLC25A1	6322
ENSG00000184887_BTBD6	6315
ENSG00000108639_SYNGR2	6312
ENSG00000132600_PRMT7	6308
ENSG00000270170_NCBP2-AS2	6308
ENSG00000101335_MYL9	6308
ENSG00000072954_TMEM38A	6296
ENSG00000100083_GGA1	6292
ENSG00000205937_RNPS1	6275
ENSG00000126767_ELK1	6272
ENSG00000172992_DCAKD	6272
ENSG00000135835_KIAA1614	6263
ENSG00000113761_ZNF346	6251
ENSG00000074582_BCS1L	6232
ENSG00000132507_EIF5A	6231
ENSG00000103932_RPAP1	6225
ENSG00000169242_EFNA1	6205
ENSG00000198837_DENND4B	6199
ENSG00000103150_MLYCD	6194
ENSG00000117305_HMGCL	6181
ENSG00000177728_TMEM94	6173
ENSG00000114993_RTKN	6132
ENSG00000131446_MGAT1	6127
ENSG00000179564_LSMEM2	6092
ENSG00000161999_JMJD8	6092
ENSG00000132768_DPH2	6086
ENSG00000143862_ARL8A	6070
ENSG00000118960_HS1BP3	6066
ENSG00000119227_PIGZ	6064
ENSG00000064490_RFXANK	6056
ENSG00000089486_CDIP1	6047
ENSG00000187778_MCRS1	6043
ENSG00000174516_PELI3	6039
ENSG00000158480_SPATA2	6038
ENSG00000090661_CERS4	6031
ENSG00000031823_RANBP3	6018
ENSG00000160948_VPS28	6010
ENSG00000116521_SCAMP3	5996
ENSG00000078061_ARAF	5992
ENSG00000137166_FOXP4	5978
ENSG00000103066_PLA2G15	5975
ENSG00000090013_BLVRB	5965
ENSG00000104884_ERCC2	5959
ENSG00000077782_FGFR1	5949
ENSG00000224940_PRRT4	5939
ENSG00000103148_NPRL3	5937
ENSG00000164068_RNF123	5937
ENSG00000161395_PGAP3	5936
ENSG00000186716_BCR	5919
ENSG00000107263_RAPGEF1	5909
ENSG00000103042_SLC38A7	5902
ENSG00000149476_TKFC	5901
ENSG00000141736_ERBB2	5901
ENSG00000011009_LYPLA2	5887
ENSG00000163870_TPRA1	5883
ENSG00000257923_CUX1	5882
ENSG00000142453_CARM1	5873
ENSG00000136718_IMP4	5861
ENSG00000174080_CTSF	5852
ENSG00000160209_PDXK	5845
ENSG00000081791_KIAA0141	5841
ENSG00000173065_FAM222B	5840
ENSG00000160959_LRRC14	5839
ENSG00000149564_ESAM	5838
ENSG00000188493_C19orf54	5825
ENSG00000178498_DTX3	5823
ENSG00000174282_ZBTB4	5818
ENSG00000134686_PHC2	5817
ENSG00000126107_HECTD3	5817
ENSG00000274605_AL355338.1	5817
ENSG00000108641_B9D1	5814
ENSG00000099910_KLHL22	5809
ENSG00000131165_CHMP1A	5799
ENSG00000039523_RIPOR1	5796
ENSG00000256073_URB1-AS1	5793
ENSG00000167118_URM1	5792
ENSG00000126882_FAM78A	5783
ENSG00000133030_MPRIP	5779
ENSG00000184792_OSBP2	5773
ENSG00000103264_FBXO31	5750
ENSG00000179604_CDC42EP4	5748
ENSG00000103034_NDRG4	5745
ENSG00000130822_PNCK	5743
ENSG00000107874_CUEDC2	5737
ENSG00000198208_RPS6KL1	5731
ENSG00000172046_USP19	5730
ENSG00000130811_EIF3G	5714
ENSG00000139428_MMAB	5712
ENSG00000071553_ATP6AP1	5709
ENSG00000130305_NSUN5	5702
ENSG00000108469_RECQL5	5695
ENSG00000141562_NARF	5676
ENSG00000167861_HID1	5675
ENSG00000119986_AVPI1	5657
ENSG00000139266_MARCH9	5654
ENSG00000110080_ST3GAL4	5642
ENSG00000175634_RPS6KB2	5633
ENSG00000176087_SLC35A4	5619
ENSG00000276075_AC027682.6	5613
ENSG00000237441_RGL2	5610
ENSG00000077348_EXOSC5	5606
ENSG00000167658_EEF2	5582
ENSG00000172638_EFEMP2	5573
ENSG00000159842_ABR	5573
ENSG00000185252_ZNF74	5564
ENSG00000185033_SEMA4B	5530
ENSG00000240849_TMEM189	5525
ENSG00000100994_PYGB	5513
ENSG00000130520_LSM4	5508
ENSG00000166337_TAF10	5508
ENSG00000172922_RNASEH2C	5498
ENSG00000103145_HCFC1R1	5482
ENSG00000135956_TMEM127	5474
ENSG00000104969_SGTA	5462
ENSG00000068383_INPP5A	5455
ENSG00000141002_TCF25	5455
ENSG00000214530_STARD10	5453
ENSG00000166169_POLL	5424
ENSG00000110665_C11orf21	5421
ENSG00000099956_SMARCB1	5417
ENSG00000176715_ACSF3	5416
ENSG00000171552_BCL2L1	5416
ENSG00000100949_RABGGTA	5411
ENSG00000099797_TECR	5406
ENSG00000145912_NHP2	5404
ENSG00000196547_MAN2A2	5401
ENSG00000148297_MED22	5387
ENSG00000140545_MFGE8	5367
ENSG00000165269_AQP7	5363
ENSG00000115649_CNPPD1	5359
ENSG00000146576_C7orf26	5339
ENSG00000275023_MLLT6	5334
ENSG00000143761_ARF1	5326
ENSG00000146834_MEPCE	5320
ENSG00000198911_SREBF2	5306
ENSG00000196363_WDR5	5291
ENSG00000198952_SMG5	5288
ENSG00000243477_NAT6	5283
ENSG00000148337_CIZ1	5282
ENSG00000196235_SUPT5H	5279
ENSG00000143842_SOX13	5269
ENSG00000183798_EMILIN3	5267
ENSG00000179950_PUF60	5258
ENSG00000103043_VAC14	5256
ENSG00000178719_GRINA	5251
ENSG00000041880_PARP3	5251
ENSG00000198892_SHISA4	5247
ENSG00000012061_ERCC1	5213
ENSG00000185133_INPP5J	5212
ENSG00000111676_ATN1	5202
ENSG00000204231_RXRB	5196
ENSG00000137038_DMAC1	5183
ENSG00000179409_GEMIN4	5181
ENSG00000070610_GBA2	5161
ENSG00000015532_XYLT2	5151
ENSG00000133316_WDR74	5131
ENSG00000187840_EIF4EBP1	5103
ENSG00000198917_SPOUT1	5091
ENSG00000185909_KLHDC8B	5090
ENSG00000010282_HHATL	5075
ENSG00000137409_MTCH1	5065
ENSG00000107736_CDH23	5060
ENSG00000162458_FBLIM1	5049
ENSG00000163995_ABLIM2	5040
ENSG00000143303_RRNAD1	5038
ENSG00000188735_TMEM120B	5027
ENSG00000154832_CXXC1	5018
ENSG00000211584_SLC48A1	5018
ENSG00000139044_B4GALNT3	5012
ENSG00000254901_BORCS8	5010
ENSG00000042753_AP2S1	5009
ENSG00000123992_DNPEP	5005
ENSG00000145901_TNIP1	5000
ENSG00000106246_PTCD1	4972
ENSG00000183011_NAA38	4955
ENSG00000160271_RALGDS	4942
ENSG00000025770_NCAPH2	4933
ENSG00000124702_KLHDC3	4929
ENSG00000129353_SLC44A2	4927
ENSG00000104805_NUCB1	4914
ENSG00000108591_DRG2	4914
ENSG00000139546_TARBP2	4913
ENSG00000173992_CCS	4903
ENSG00000084764_MAPRE3	4903
ENSG00000120725_SIL1	4898
ENSG00000101152_DNAJC5	4898
ENSG00000152284_TCF7L1	4897
ENSG00000204371_EHMT2	4869
ENSG00000132694_ARHGEF11	4868
ENSG00000149182_ARFGAP2	4867
ENSG00000100982_PCIF1	4844
ENSG00000140995_DEF8	4844
ENSG00000126005_MMP24-AS1	4841
ENSG00000168268_NT5DC2	4835
ENSG00000125755_SYMPK	4830
ENSG00000148399_DPH7	4813
ENSG00000107021_TBC1D13	4808
ENSG00000177030_DEAF1	4803
ENSG00000106266_SNX8	4801
ENSG00000187051_RPS19BP1	4781
ENSG00000166987_MBD6	4778
ENSG00000115468_EFHD1	4778
ENSG00000160783_PMF1	4767
ENSG00000089220_PEBP1	4763
ENSG00000110108_TMEM109	4759
ENSG00000141456_PELP1	4755
ENSG00000130640_TUBGCP2	4754
ENSG00000161203_AP2M1	4750
ENSG00000105677_TMEM147	4749
ENSG00000112033_PPARD	4737
ENSG00000103275_UBE2I	4721
ENSG00000148331_ASB6	4716
ENSG00000177963_RIC8A	4716
ENSG00000104522_TSTA3	4697
ENSG00000149923_PPP4C	4696
ENSG00000163930_BAP1	4691
ENSG00000159640_ACE	4685
ENSG00000105671_DDX49	4680
ENSG00000144199_FAHD2B	4679
ENSG00000272106_AL691432.2	4672
ENSG00000168067_MAP4K2	4666
ENSG00000144040_SFXN5	4663
ENSG00000120896_SORBS3	4660
ENSG00000148300_REXO4	4654
ENSG00000175573_C11orf68	4654
ENSG00000167191_GPRC5B	4650
ENSG00000074219_TEAD2	4635
ENSG00000183020_AP2A2	4634
ENSG00000169221_TBC1D10B	4630
ENSG00000128602_SMO	4627
ENSG00000157216_SSBP3	4621
ENSG00000230555_AL450326.1	4617
ENSG00000041988_THAP3	4615
ENSG00000149016_TUT1	4609
ENSG00000085117_CD82	4605
ENSG00000168591_TMUB2	4595
ENSG00000110104_CCDC86	4587
ENSG00000108509_CAMTA2	4586
ENSG00000173786_CNP	4577
ENSG00000141644_MBD1	4564
ENSG00000204498_NFKBIL1	4561
ENSG00000253716_MINCR	4550
ENSG00000175213_ZNF408	4547
ENSG00000027847_B4GALT7	4545
ENSG00000143801_PSEN2	4536
ENSG00000157954_WIPI2	4516
ENSG00000132879_FBXO44	4510
ENSG00000079393_DUSP13	4507
ENSG00000172590_MRPL52	4504
ENSG00000014216_CAPN1	4501
ENSG00000101997_CCDC22	4498
ENSG00000103199_ZNF500	4476
ENSG00000235437_LINC01278	4458
ENSG00000142039_CCDC97	4437
ENSG00000107551_RASSF4	4428
ENSG00000182810_DDX28	4426
ENSG00000163719_MTMR14	4419
ENSG00000170577_SIX2	4419
ENSG00000274180_NATD1	4406
ENSG00000086544_ITPKC	4392
ENSG00000185274_GALNT17	4392
ENSG00000124444_ZNF576	4367
ENSG00000162430_SELENON	4365
ENSG00000187147_RNF220	4364
ENSG00000147955_SIGMAR1	4349
ENSG00000076555_ACACB	4336
ENSG00000011243_AKAP8L	4326
ENSG00000100401_RANGAP1	4324
ENSG00000119431_HDHD3	4307
ENSG00000100056_ESS2	4304
ENSG00000125818_PSMF1	4303
ENSG00000198853_RUSC2	4301
ENSG00000105204_DYRK1B	4290
ENSG00000133895_MEN1	4288
ENSG00000213930_GALT	4285
ENSG00000115275_MOGS	4285
ENSG00000141540_TTYH2	4270
ENSG00000124608_AARS2	4268
ENSG00000143294_PRCC	4258
ENSG00000164081_TEX264	4248
ENSG00000214087_ARL16	4235
ENSG00000084207_GSTP1	4226
ENSG00000140400_MAN2C1	4215
ENSG00000221838_AP4M1	4194
ENSG00000234869_AL021392.1	4181
ENSG00000177830_CHID1	4176
ENSG00000118194_TNNT2	4173
ENSG00000100908_EMC9	4167
ENSG00000077312_SNRPA	4152
ENSG00000161664_ASB16	4147
ENSG00000156873_PHKG2	4146
ENSG00000110651_CD81	4145
ENSG00000185085_INTS5	4138
ENSG00000179134_SAMD4B	4119
ENSG00000182872_RBM10	4117
ENSG00000132589_FLOT2	4116
ENSG00000144535_DIS3L2	4115
ENSG00000173267_SNCG	4114
ENSG00000087087_SRRT	4111
ENSG00000120318_ARAP3	4101
ENSG00000139880_CDH24	4098
ENSG00000170430_MGMT	4084
ENSG00000106351_AGFG2	4081
ENSG00000102967_DHODH	4078
ENSG00000136802_LRRC8A	4073
ENSG00000040531_CTNS	4072
ENSG00000155066_PROM2	4071
ENSG00000125651_GTF2F1	4054
ENSG00000136807_CDK9	4046
ENSG00000174775_HRAS	4037
ENSG00000214160_ALG3	4034
ENSG00000101150_TPD52L2	4033
ENSG00000204348_DXO	4031
ENSG00000110844_PRPF40B	4028
ENSG00000110711_AIP	4027
ENSG00000131067_GGT7	4011
ENSG00000100997_ABHD12	4007
ENSG00000175115_PACS1	4000
ENSG00000172354_GNB2	3998
ENSG00000089159_PXN	3992
ENSG00000104679_R3HCC1	3982
ENSG00000160214_RRP1	3972
ENSG00000114383_TUSC2	3966
ENSG00000124507_PACSIN1	3959
ENSG00000049239_H6PD	3958
ENSG00000198728_LDB1	3951
ENSG00000125148_MT2A	3948
ENSG00000169084_DHRSX	3944
ENSG00000204859_ZBTB48	3940
ENSG00000105576_TNPO2	3938
ENSG00000178149_DALRD3	3924
ENSG00000178028_DMAP1	3918
ENSG00000130985_UBA1	3918
ENSG00000183401_CCDC159	3911
ENSG00000161544_CYGB	3904
ENSG00000177951_BET1L	3900
ENSG00000177103_DSCAML1	3896
ENSG00000186866_POFUT2	3893
ENSG00000063244_U2AF2	3860
ENSG00000116151_MORN1	3856
ENSG00000122678_POLM	3840
ENSG00000182533_CAV3	3832
ENSG00000186501_TMEM222	3830
ENSG00000179958_DCTPP1	3825
ENSG00000100325_ASCC2	3824
ENSG00000165752_STK32C	3820
ENSG00000132394_EEFSEC	3814
ENSG00000198844_ARHGEF15	3784
ENSG00000109103_UNC119	3776
ENSG00000054611_TBC1D22A	3775
ENSG00000008838_MED24	3756
ENSG00000181666_HKR1	3742
ENSG00000196453_ZNF777	3739
ENSG00000204438_GPANK1	3737
ENSG00000166444_ST5	3721
ENSG00000011021_CLCN6	3696
ENSG00000087157_PGS1	3684
ENSG00000177352_CCDC71	3680
ENSG00000188130_MAPK12	3679
ENSG00000079308_TNS1	3677
ENSG00000020256_ZFP64	3675
ENSG00000168890_TMEM150A	3668
ENSG00000114735_HEMK1	3659
ENSG00000156639_ZFAND3	3653
ENSG00000114026_OGG1	3649
ENSG00000131653_TRAF7	3639
ENSG00000158941_CCAR2	3636
ENSG00000132004_FBXW9	3634
ENSG00000005486_RHBDD2	3629
ENSG00000197915_HRNR	3618
ENSG00000175137_SH3BP5L	3616
ENSG00000161265_U2AF1L4	3605
ENSG00000106397_PLOD3	3605
ENSG00000134253_TRIM45	3604
ENSG00000138835_RGS3	3579
ENSG00000173064_HECTD4	3577
ENSG00000130175_PRKCSH	3574
ENSG00000124155_PIGT	3560
ENSG00000063322_MED29	3560
ENSG00000197818_SLC9A8	3558
ENSG00000160741_CRTC2	3537
ENSG00000167291_TBC1D16	3532
ENSG00000104967_NOVA2	3529
ENSG00000125386_FAM193A	3529
ENSG00000240771_ARHGEF25	3510
ENSG00000204469_PRRC2A	3501
ENSG00000168495_POLR3D	3501
ENSG00000154222_CC2D1B	3498
ENSG00000140577_CRTC3	3496
ENSG00000277258_PCGF2	3495
ENSG00000140365_COMMD4	3482
ENSG00000107521_HPS1	3478
ENSG00000107738_VSIR	3457
ENSG00000167693_NXN	3441
ENSG00000182858_ALG12	3431
ENSG00000177469_CAVIN1	3423
ENSG00000167625_ZNF526	3420
ENSG00000037042_TUBG2	3418
ENSG00000171148_TADA3	3414
ENSG00000184381_PLA2G6	3408
ENSG00000072958_AP1M1	3406
ENSG00000169057_MECP2	3403
ENSG00000160014_CALM3	3402
ENSG00000167173_C15orf39	3401
ENSG00000105732_ZNF574	3395
ENSG00000182544_MFSD5	3394
ENSG00000184441_AP001062.1	3394
ENSG00000102032_RENBP	3386
ENSG00000162878_PKDCC	3373
ENSG00000115568_ZNF142	3369
ENSG00000127837_AAMP	3366
ENSG00000068308_OTUD5	3360
ENSG00000136271_DDX56	3352
ENSG00000105705_SUGP1	3349
ENSG00000173894_CBX2	3335
ENSG00000277287_AL109976.1	3321
ENSG00000129933_MAU2	3320
ENSG00000144589_STK11IP	3317
ENSG00000172375_C2CD2L	3313
ENSG00000100097_LGALS1	3309
ENSG00000101191_DIDO1	3303
ENSG00000183617_MRPL54	3300
ENSG00000096070_BRPF3	3292
ENSG00000155252_PI4K2A	3282
ENSG00000198026_ZNF335	3281
ENSG00000158850_B4GALT3	3264
ENSG00000175220_ARHGAP1	3262
ENSG00000143570_SLC39A1	3248
ENSG00000141503_MINK1	3242
ENSG00000180104_EXOC3	3240
ENSG00000185386_MAPK11	3239
ENSG00000162298_SYVN1	3228
ENSG00000100124_ANKRD54	3219
ENSG00000180035_ZNF48	3214
ENSG00000100242_SUN2	3205
ENSG00000236104_ZBTB22	3203
ENSG00000160917_CPSF4	3174
ENSG00000100395_L3MBTL2	3173
ENSG00000172819_RARG	3172
ENSG00000189319_FAM53B	3169
ENSG00000196739_COL27A1	3149
ENSG00000158856_DMTN	3144
ENSG00000102312_PORCN	3144
ENSG00000141504_SAT2	3143
ENSG00000125447_GGA3	3142
ENSG00000178038_ALS2CL	3117
ENSG00000131748_STARD3	3101
ENSG00000215572_ESRRAP1	3097
ENSG00000205978_NYNRIN	3091
ENSG00000196372_ASB13	3089
ENSG00000109065_NAT9	3073
ENSG00000006071_ABCC8	3039
ENSG00000166140_ZFYVE19	3037
ENSG00000143373_ZNF687	3033
ENSG00000009830_POMT2	3032
ENSG00000219200_RNASEK	3028
ENSG00000087152_ATXN7L3	3026
ENSG00000172500_FIBP	3022
ENSG00000103966_EHD4	2995
ENSG00000162836_ACP6	2988
ENSG00000100403_ZC3H7B	2986
ENSG00000137411_VARS2	2985
ENSG00000204851_PNMA8B	2979
ENSG00000141569_TRIM65	2975
ENSG00000167182_SP2	2968
ENSG00000259956_RBM15B	2966
ENSG00000085185_BCORL1	2964
ENSG00000187266_EPOR	2961
ENSG00000102100_SLC35A2	2956
ENSG00000053501_USE1	2938
ENSG00000148288_GBGT1	2933
ENSG00000107185_RGP1	2923
ENSG00000080189_SLC35C2	2891
ENSG00000185019_UBOX5	2885
ENSG00000268516_AC020915.4	2868
ENSG00000196814_MVB12B	2866
ENSG00000137802_MAPKBP1	2860
ENSG00000168005_C11orf84	2858
ENSG00000183258_DDX41	2848
ENSG00000158156_XKR8	2843
ENSG00000185163_DDX51	2836
ENSG00000173818_ENDOV	2822
ENSG00000112659_CUL9	2814
ENSG00000060656_PTPRU	2809
ENSG00000164086_DUSP7	2807
ENSG00000149357_LAMTOR1	2802
ENSG00000125458_NT5C	2800
ENSG00000044090_CUL7	2800
ENSG00000204351_SKIV2L	2795
ENSG00000239306_RBM14	2786
ENSG00000094914_AAAS	2784
ENSG00000121900_TMEM54	2762
ENSG00000132781_MUTYH	2755
ENSG00000129467_ADCY4	2754
ENSG00000137507_LRRC32	2741
ENSG00000157978_LDLRAP1	2739
ENSG00000183010_PYCR1	2736
ENSG00000124713_GNMT	2712
ENSG00000100991_TRPC4AP	2709
ENSG00000184640_SEPT9	2703
ENSG00000163344_PMVK	2696
ENSG00000147324_MFHAS1	2690
ENSG00000186635_ARAP1	2690
ENSG00000174365_SNHG11	2690
ENSG00000221883_ARIH2OS	2680
ENSG00000175727_MLXIP	2676
ENSG00000109066_TMEM104	2672
ENSG00000177239_MAN1B1	2669
ENSG00000177697_CD151	2657
ENSG00000196998_WDR45	2653
ENSG00000177042_TMEM80	2644
ENSG00000155256_ZFYVE27	2632
ENSG00000231856_AL162377.1	2617
ENSG00000169750_RAC3	2613
ENSG00000155666_KDM8	2609
ENSG00000070814_TCOF1	2600
ENSG00000006062_MAP3K14	2594
ENSG00000094631_HDAC6	2587
ENSG00000168003_SLC3A2	2585
ENSG00000110514_MADD	2584
ENSG00000134575_ACP2	2583
ENSG00000205209_SCGB2B2	2560
ENSG00000100023_PPIL2	2539
ENSG00000147457_CHMP7	2530
ENSG00000051009_FAM160A2	2519
ENSG00000153066_TXNDC11	2519
ENSG00000176476_SGF29	2514
ENSG00000033627_ATP6V0A1	2514
ENSG00000178307_TMEM11	2514
ENSG00000089060_SLC8B1	2507
ENSG00000254413_CHKB-CPT1B	2495
ENSG00000175274_TP53I11	2483
ENSG00000223825_DAZAP2P1	2476
ENSG00000068724_TTC7A	2470
ENSG00000158062_UBXN11	2459
ENSG00000204536_CCHCR1	2444
ENSG00000091073_DTX2	2442
ENSG00000106290_TAF6	2442
ENSG00000068323_TFE3	2440
ENSG00000171603_CLSTN1	2434
ENSG00000273145_BX537318.1	2416
ENSG00000160803_UBQLN4	2414
ENSG00000169926_KLF13	2406
ENSG00000198198_SZT2	2405
ENSG00000067606_PRKCZ	2398
ENSG00000171163_ZNF692	2396
ENSG00000169418_NPR1	2382
ENSG00000103248_MTHFSD	2367
ENSG00000119522_DENND1A	2354
ENSG00000124313_IQSEC2	2349
ENSG00000213753_CENPBD1P1	2346
ENSG00000198715_GLMP	2338
ENSG00000249673_NOP14-AS1	2327
ENSG00000089154_GCN1	2323
ENSG00000110063_DCPS	2322
ENSG00000097007_ABL1	2314
ENSG00000099999_RNF215	2308
ENSG00000125734_GPR108	2306
ENSG00000128563_PRKRIP1	2285
ENSG00000100280_AP1B1	2274
ENSG00000139645_ANKRD52	2274
ENSG00000164535_DAGLB	2269
ENSG00000101294_HM13	2267
ENSG00000103496_STX4	2267
ENSG00000092098_RNF31	2252
ENSG00000141696_P3H4	2237
ENSG00000225190_PLEKHM1	2236
ENSG00000254986_DPP3	2222
ENSG00000205336_ADGRG1	2208
ENSG00000144591_GMPPA	2197
ENSG00000006025_OSBPL7	2185
ENSG00000013306_SLC25A39	2183
ENSG00000235106_LINC00094	2179
ENSG00000171720_HDAC3	2178
ENSG00000196890_HIST3H2BB	2171
ENSG00000184508_HDDC3	2165
ENSG00000074755_ZZEF1	2158
ENSG00000197724_PHF2	2153
ENSG00000213024_NUP62	2150
ENSG00000164970_FAM219A	2136
ENSG00000234616_JRK	2122
ENSG00000175309_PHYKPL	2120
ENSG00000136878_USP20	2119
ENSG00000143537_ADAM15	2115
ENSG00000175467_SART1	2113
ENSG00000112576_CCND3	2096
ENSG00000114395_CYB561D2	2094
ENSG00000249115_HAUS5	2075
ENSG00000081692_JMJD4	2074
ENSG00000143772_ITPKB	2061
ENSG00000140688_C16orf58	2050
ENSG00000187534_PRR13P5	2048
ENSG00000065970_FOXJ2	2044
ENSG00000140104_C14orf79	2042
ENSG00000112039_FANCE	2030
ENSG00000203879_GDI1	2025
ENSG00000120314_WDR55	2007
ENSG00000158793_NIT1	1991
ENSG00000127399_LRRC61	1966
ENSG00000143554_SLC27A3	1963
ENSG00000113108_APBB3	1963
ENSG00000226210_AC215219.1	1959
ENSG00000162512_SDC3	1942
ENSG00000161526_SAP30BP	1942
ENSG00000127191_TRAF2	1940
ENSG00000133597_ADCK2	1940
ENSG00000155287_SLC25A28	1930
ENSG00000099308_MAST3	1912
ENSG00000173548_SNX33	1910
ENSG00000135097_MSI1	1909
ENSG00000167565_SERTAD3	1902
ENSG00000130723_PRRC2B	1880
ENSG00000213614_HEXA	1879
ENSG00000006194_ZNF263	1856
ENSG00000124299_PEPD	1856
ENSG00000070614_NDST1	1852
ENSG00000165861_ZFYVE1	1834
ENSG00000189306_RRP7A	1809
ENSG00000255198_SNHG9	1804
ENSG00000125877_ITPA	1784
ENSG00000108219_TSPAN14	1781
ENSG00000213918_DNASE1	1752
ENSG00000249471_ZNF324B	1751
ENSG00000122965_RBM19	1750
ENSG00000140326_CDAN1	1745
ENSG00000149782_PLCB3	1724
ENSG00000167548_KMT2D	1694
ENSG00000178921_PFAS	1690
ENSG00000140553_UNC45A	1684
ENSG00000165689_SDCCAG3	1677
ENSG00000105085_MED26	1669
ENSG00000136279_DBNL	1661
ENSG00000162551_ALPL	1654
ENSG00000204427_ABHD16A	1642
ENSG00000167395_ZNF646	1624
ENSG00000100865_CINP	1618
ENSG00000001617_SEMA3F	1617
ENSG00000184271_POU6F1	1616
ENSG00000185896_LAMP1	1606
ENSG00000213859_KCTD11	1604
ENSG00000028310_BRD9	1591
ENSG00000197283_SYNGAP1	1561
ENSG00000105443_CYTH2	1551
ENSG00000197122_SRC	1542
ENSG00000137076_TLN1	1507
ENSG00000102057_KCND1	1501
ENSG00000099622_CIRBP	1491
ENSG00000272655_POLR2J4	1491
ENSG00000100311_PDGFB	1477
ENSG00000062524_LTK	1465
ENSG00000165724_ZMYND19	1459
ENSG00000177738_AC025171.1	1455
ENSG00000184584_TMEM173	1452
ENSG00000162650_ATXN7L2	1443
ENSG00000171224_C10orf35	1443
ENSG00000156983_BRPF1	1439
ENSG00000120645_IQSEC3	1436
ENSG00000172890_NADSYN1	1434
ENSG00000187531_SIRT7	1422
ENSG00000137824_RMDN3	1418
ENSG00000154133_ROBO4	1404
ENSG00000157570_TSPAN18	1390
ENSG00000156453_PCDH1	1390
ENSG00000135709_KIAA0513	1383
ENSG00000139636_LMBR1L	1356
ENSG00000204439_C6orf47	1355
ENSG00000197226_TBC1D9B	1348
ENSG00000146535_GNA12	1343
ENSG00000149577_SIDT2	1339
ENSG00000119509_INVS	1339
ENSG00000179335_CLK3	1338
ENSG00000198373_WWP2	1331
ENSG00000184371_CSF1	1308
ENSG00000165714_BORCS5	1273
ENSG00000224870_AL391244.1	1272
ENSG00000163516_ANKZF1	1259
ENSG00000235098_ANKRD65	1247
ENSG00000169217_CD2BP2	1244
ENSG00000165406_MARCH8	1235
ENSG00000182511_FES	1229
ENSG00000117298_ECE1	1223
ENSG00000055483_USP36	1221
ENSG00000214655_ZSWIM8	1207
ENSG00000128394_APOBEC3F	1192
ENSG00000071859_FAM50A	1189
ENSG00000111737_RAB35	1186
ENSG00000146109_ABT1	1179
ENSG00000246731_MGC16275	1177
ENSG00000121289_CEP89	1177
ENSG00000131831_RAI2	1172
ENSG00000177674_AGTRAP	1155
ENSG00000161021_MAML1	1142
ENSG00000043143_JADE2	1110
ENSG00000181284_TMEM102	1108
ENSG00000100029_PES1	1085
ENSG00000139832_RAB20	1067
ENSG00000213676_ATF6B	1062
ENSG00000133056_PIK3C2B	1055
ENSG00000106367_AP1S1	1050
ENSG00000157778_PSMG3	1029
ENSG00000147439_BIN3	1021
cg20429763_cg20429763_NA	990
cg07351637_GALK2	985
cg25116020_TRIM25	977
cg27455613_TBCD	972
cg15359916_FBXO9	970
cg21569693_cg21569693_NA	969
ENSG00000116584_ARHGEF2	963
ENSG00000177084_POLE	961
cg12619262_CHST12	957
cg04678916_SPTBN1	956
cg16692277_GUCY1B2	956
cg10498921_CYSTM1,PFDN1	956
cg26371345_TMEM63B,MRPL14	954
cg09974304_UBE2I,BAIAP3	954
cg10926148_KRT1	954
cg02627227_AGPAT4	953
cg20254251_ZC3H3	953
cg11119694_CNOT2	946
cg10062945_EYS	946
cg24737408_cg24737408_NA	946
cg23057687_CCSER1,TMSB4XP8	945
cg10683565_ROBO1	943
cg20911180_cg20911180_NA	942
cg13976496_cg13976496_NA	941
cg09844976_cg09844976_NA	941
cg24599065_CASP10,CASP8	941
cg20597619_cg20597619_NA	940
cg04377618_cg04377618_NA	939
cg04197935_FZD2	939
cg08516993_SLC5A10,FAM83G	938
cg16745604_CASP10,CFLAR	937
cg02642958_cg02642958_NA	936
cg24478420_cg24478420_NA	936
cg21157904_TRIM14,NANS	933
cg22375856_TBC1D5	933
cg12658374_ARL5C,CACNB1	933
cg11803247_MRPS35	932
cg13428066_KCNQ1,KCNQ1OT1	932
cg14656441_NDUFS5	930
cg06062998_LARP1	930
cg11166893_RASA3	930
cg15785379_TEX2	929
cg06361606_PBXIP1,PMVK	928
cg25748958_THADA	928
cg04112866_TGFBRAP1	928
ENSG00000186532_SMYD4	927
cg12925682_OSMR	926
cg19793207_SDCBP	926
cg25587662_NAPG	926
cg16773162_RFX4	926
cg20215476_UBQLN4P1,GYG1	925
cg22331200_MPO	925
cg08414965_cg08414965_NA	925
cg00042882_AP1S1	923
cg01383911_cg01383911_NA	923
cg09351156_RNF144B	922
cg03896273_NRF1	922
cg08687052_TIMP3,SYN3	922
cg26437306_LIFR	921
cg14747072_R3HDM2,STAC3	921
cg02100008_cg02100008_NA	920
cg01268901_WNT5B	917
cg04825276_DIP2C	916
cg02711268_cg02711268_NA	914
cg12412154_cg12412154_NA	913
cg18766033_cg18766033_NA	912
cg07145979_COL23A1	912
cg09838262_IKZF3	912
cg19865412_PLS1	912
cg27051231_ARMC9	912
cg02539671_TREML1,TREM2	911
cg17483482_IGSF3	910
cg19884600_PYHIN1	909
cg04382783_cg04382783_NA	909
cg04656451_cg04656451_NA	908
cg26350784_cg26350784_NA	908
cg03550965_cg03550965_NA	907
cg15678817_CDC42BPG,EHD1	906
cg10174582_cg10174582_NA	906
cg02716128_cg02716128_NA	905
cg10512408_WASF1,CDC40	905
cg22019177_cg22019177_NA	904
cg25005374_CLIC4	904
cg16304656_PRKAR1B	904
cg08154963_RAD51D	904
cg17966884_cg17966884_NA	904
cg06390363_cg06390363_NA	904
cg22291694_PARK2	904
cg03406106_PKD1L2	903
cg09933401_ACER3	903
cg08896042_cg08896042_NA	902
cg02815538_cg02815538_NA	902
cg23827488_FAM65B	901
cg27152128_WIPI2	901
cg10521147_TPT1-AS1,TPT1	899
cg01218053_INPP5D	899
cg25992775_cg25992775_NA	898
ENSG00000038358_EDC4	898
cg20445465_cg20445465_NA	897
cg13093934_WISP2,KCNK15-AS1	897
cg13836518_CORO2A,TRIM14	896
cg06042849_DIP2C	896
cg07922062_CEBPG	896
cg04839991_cg04839991_NA	896
cg09989727_TCF12	896
cg05864433_AMZ1	896
cg07449799_ZNF35	896
cg11802985_ERC2	896
cg02369548_INPP4A	895
cg23582644_cg23582644_NA	895
cg06104914_DNAH8	895
cg01557792_SUSD6	894
cg13550311_cg13550311_NA	893
cg04964845_PPM1A	893
cg17023395_WDPCP	892
cg14880079_ATP13A3	891
cg19981475_ACSS3	891
cg07002058_TSPOAP1,TSPOAP1-AS1	891
cg16003672_DIRC3	891
cg26389638_PTPRN2	890
cg07718713_CEP72	890
ENSG00000129351_ILF3	890
cg27156952_KDM6B,TMEM88,CYB5D1,NAA38	889
cg09232958_VPS33A,CLIP1	889
cg24435679_CLYBL	888
cg16744186_MAD1L1	888
cg06321336_SPN,QPRT	887
cg22051146_COL23A1	886
cg13429260_PLEKHB1	886
cg24608504_SPTBN1,RPL23AP32	886
cg15156071_cg15156071_NA	886
cg26284985_WASF1	886
cg07761116_PIP4K2A	886
cg01175433_ATP2B2	886
cg13016975_cg13016975_NA	885
cg06694040_GALNT18	885
cg19510699_SNPH,SDCBP2,SDCBP2-AS1	885
cg04522949_SIVA1,ADSSL1	884
cg03917100_SCN4A,CD79B	884
cg24814628_TMC2	884
cg00983608_ZNF783	883
cg25061349_ZNF318	882
cg13564460_cg13564460_NA	882
cg15001215_cg15001215_NA	882
cg24740325_AACS	882
ENSG00000105612_DNASE2	882
cg12443195_cg12443195_NA	881
cg04399461_GLI2	881
cg06038180_ACAP1,KCTD11	881
cg14282531_cg14282531_NA	881
cg25021884_cg25021884_NA	880
cg10024583_KPNB1,TBKBP1	880
cg16217908_C3orf52	879
cg26267081_FAM181A-AS1,ASB2	879
cg12220466_cg12220466_NA	879
cg14368382_cg14368382_NA	879
cg25756470_NCF4	878
cg09200260_RUNX1	878
cg03734677_RPL26,KRBA2	878
cg18104149_ERC2	877
cg24499627_CDH23,C10orf54	877
cg06967602_CAMK1D	877
cg23719393_ZNF654,C3orf38,CGGBP1	877
cg17693534_MAD1L1	877
cg24627900_cg24627900_NA	876
cg11537607_DPYSL2	875
cg17501982_NCK2	875
cg27300813_cg27300813_NA	875
ENSG00000106479_ZNF862	875
cg07218487_KMT2D,PRKAG1	874
cg14983936_GCA	874
cg15601361_ADTRP	874
cg01742370_IBA57,GJC2	874
cg21563471_ERMN	873
cg14178895_ADTRP	873
cg18012556_FRMD5	873
cg01968525_AMBRA1	872
cg02222901_cg02222901_NA	872
cg00020348_cg00020348_NA	872
ENSG00000170037_CNTROB	872
cg26080567_DOPEY2,CBR3-AS1	871
cg14484681_SETX	871
cg16681310_cg16681310_NA	870
cg16248515_cg16248515_NA	870
cg02002125_cg02002125_NA	870
cg02152108_RAC2	870
cg05825596_cg05825596_NA	869
cg09914480_cg09914480_NA	869
cg06562406_ADGRL3	869
cg07537181_cg07537181_NA	869
cg14085012_AMPH	869
cg19763997_cg19763997_NA	868
cg22335826_RREB1	868
cg11945905_PRPF6,ZNF512B,LINC00176	868
cg05253759_KIAA0100,SPAG5-AS1	867
cg10916515_cg10916515_NA	867
cg09983546_TLN2	867
cg21491405_VIPAS39,AHSA1	867
cg01222168_D2HGDH	867
cg24488469_cg24488469_NA	866
cg00126173_FAM63B,RNF111	866
cg03417788_cg03417788_NA	866
cg00259834_RFTN1	865
cg12043048_cg12043048_NA	865
cg23614835_cg23614835_NA	865
cg13561918_CACFD1,ADAMTS13	865
cg00987743_BSN-AS2,DAG1	865
cg25591451_TRIM4,GJC3	864
cg11954957_LINC01128,LINC00115,FAM87B	864
cg17454561_GLI2	864
cg05290705_SLC12A9	864
cg21873674_FBLN2	863
cg09666573_HRH1	863
cg08276752_cg08276752_NA	863
cg14353208_RBM33	863
cg03423916_NPR1	862
cg15107887_cg15107887_NA	862
cg15441369_SRSF6	862
ENSG00000106244_PDAP1	862
cg05787839_MORN1	861
cg01675895_cg01675895_NA	861
cg08635097_cg08635097_NA	860
cg19981409_NOX4	860
cg16089233_UBE2H	860
cg04740679_GRTP1-AS1,GRTP1	860
cg07528614_CYP27A1	860
cg08820231_ARHGEF25,SLC26A10,B4GALNT1	859
cg00151728_ACTRT3	858
cg25946605_CYS1	858
cg04190578_ESRRB	858
cg09309891_AP1G2,THTPA,JPH4	858
cg02127980_RXRA	858
cg05043025_cg05043025_NA	858
cg25389087_MBP	858
cg17661103_CA13	858
cg08426823_MAML2	857
cg08078648_cg08078648_NA	857
cg06423925_SFR1,CFAP43	857
cg14159007_UNC13C	857
cg16759952_TMEM102,NLGN2	856
cg04457885_cg04457885_NA	856
cg16133872_LSP1,PRR33	856
cg02570501_ZNF107	855
cg13030790_RUNX1	855
cg25605771_SLC6A9,CCDC24,B4GALT2	855
cg05081352_C2orf42	855
cg13993643_PEPD	855
cg08628635_E2F3	855
cg13415795_SH2D7,CIB2	855
cg05138892_cg05138892_NA	855
cg25212571_cg25212571_NA	855
cg12928071_SLC45A4	855
cg15111398_HIVEP3	854
cg03146683_CASC15	854
cg14146249_cg14146249_NA	854
cg14097568_cg14097568_NA	853
cg21772773_CAMTA1	853
cg02768785_PPP1R13L,CD3EAP,ERCC1	852
cg25313930_FAM124B	852
cg02705958_cg02705958_NA	852
cg21372107_MGAT5	852
cg21781546_BCS1L,ZNF142,RNF25	852
cg20939322_FERMT2	852
cg01476678_UNC5A	851
cg14003886_cg14003886_NA	851
cg18793367_CUX1	851
cg08079052_HSF1	851
cg23556108_BCL11A	851
cg21216547_DBT	851
cg17362927_MYL1	851
cg17440248_cg17440248_NA	851
cg18808692_SUDS3P1	849
cg12021988_cg12021988_NA	849
cg07142325_WARS2	849
cg06600287_ECHDC2,SCP2	848
cg02499139_TNIK	848
cg14312167_GOLGA3	848
cg20074141_CXCL12	848
cg14486632_cg14486632_NA	848
cg16845483_cg16845483_NA	847
cg02523938_UBE2MP1	847
cg17246810_cg17246810_NA	847
cg08678925_ALPK3,ZNF592	847
cg22745440_PFDN6,TAPBP,RGL2	847
cg17984267_cg17984267_NA	846
cg13539372_NR6A1	846
cg00950343_NREP	846
cg04250873_cg04250873_NA	845
cg05346631_ZNF682	845
cg24724832_DRAXIN	844
cg10197405_KAT8,PRSS36	844
ENSG00000135299_ANKRD6	844
cg10033725_DNAAF5	843
cg12732155_LAPTM5	843
cg11411705_TSPAN14	843
cg07216656_ERGIC2	843
cg02243630_KIAA0922	843
cg15545247_HCAR1	843
cg10031203_cg10031203_NA	843
cg23910524_cg23910524_NA	843
cg06104408_CAMK2B	843
cg08815365_TENM2	843
cg23958600_cg23958600_NA	843
cg11363527_SLC4A4	842
cg14831020_cg14831020_NA	842
cg23981172_cg23981172_NA	842
cg06838028_L3MBTL2	842
cg08759745_EXOC2	842
cg26149678_NUMA1,RNF121,IL18BP	841
cg09391066_TUBB2A	841
cg08765199_cg08765199_NA	841
cg12613382_cg12613382_NA	841
cg26797529_CFAP46	841
cg11163571_NEK4	840
cg01263541_GPI,PDCD2L	840
cg23538703_IGSF11	840
cg20515136_IL12A	840
cg26651950_LGALS2	840
cg19599226_cg19599226_NA	840
cg00583731_cg00583731_NA	840
cg11585952_cg11585952_NA	840
cg26154999_FAM124B	840
cg00826537_cg00826537_NA	839
cg10163377_MARVELD1	839
cg05355346_EIF3H,UTP23	839
cg00971885_cg00971885_NA	839
cg13714797_KDM4C	839
cg00810710_GLP2R,RCVRN	839
cg02935904_TTC22	838
cg26402555_BRF1	838
cg09535718_LRPAP1	838
cg22434594_cg22434594_NA	838
cg26537568_PXMP4	838
cg24940155_GPC6	837
cg14472810_MAD1L1	837
cg10566581_TGIF2	836
cg11840112_cg11840112_NA	836
cg08557008_P4HA3	836
cg14905466_SGK1	836
cg26982601_PRKDC	836
cg26812411_ARHGAP32	836
cg10096040_EVL	835
cg06317209_CTDSP2,AVIL,TSFM	835
cg11729363_KLHL6	835
cg20783319_NCAM1	835
cg01727145_SPEG	835
cg15164573_KRBA2	835
cg14502850_TROAP,DNAJC22	835
cg07249247_BRAT1,IQCE	835
cg24450400_ARID2	835
cg09821400_cg09821400_NA	834
cg12228123_AFAP1-AS1,AFAP1	834
cg05606190_cg05606190_NA	834
cg13641244_PPP3CA	834
cg06640279_FCMR	834
cg17247190_cg17247190_NA	834
cg14839871_cg14839871_NA	834
cg25363192_RAVER2	834
cg04078163_ZFPL1,VPS51,TMEM262,CDCA5	833
cg10781704_NRBF2	833
cg03881351_ATXN10	833
cg17403995_NRDC	833
cg04550626_MICU1,DNAJB12	833
cg26147269_HDAC11	833
cg04068578_ST3GAL6	832
cg22697517_DBF4B	832
cg11453190_RALY,EIF2S2	832
cg17254434_AARD	832
cg11390541_TMEM189,UBE2V1	832
cg02979703_ZNF703	832
cg21218864_cg21218864_NA	831
cg08947915_TACC3	831
cg21822635_cg21822635_NA	831
cg05698294_cg05698294_NA	831
cg02538337_cg02538337_NA	831
cg13976251_cg13976251_NA	831
cg03580065_PGAM1	830
cg00571483_TACSTD2	830
cg25881281_COL1A2	830
cg14533644_FUBP3	830
cg10375409_CD247	830
cg00710229_LAMA3	830
cg07240557_STK38L	830
cg16054907_PLXNB2,MAPK12,MAPK11	829
cg12083086_BMPR1B	829
cg16104584_SLC2A5	829
cg09731079_SLC9A5,FHOD1,TMEM208,LRRC29	829
cg02631153_WRAP73,TPRG1L	828
cg17355865_MYO7A	828
cg04697624_RAP1B	828
cg23010035_cg23010035_NA	828
cg16399664_OAS2,OAS3	827
cg14658346_cg14658346_NA	827
cg22575347_cg22575347_NA	827
cg17534029_RTEL1,RTEL1-TNFRSF6B	827
cg19266276_cg19266276_NA	827
cg01056808_FAT3	827
cg17290554_ZNF394,ZNF789	827
cg27063372_PIGQ,NHLRC4	826
cg19549898_PLEKHH1,TMEM229B	826
cg03539041_MAST4	826
cg06710328_cg06710328_NA	826
cg26075639_GNA12,AMZ1	825
cg26389913_cg26389913_NA	825
cg05568549_BYSL,CCND3	825
cg26877678_KSR1	825
cg15527515_SLC7A8	825
cg19656415_SFRP1	824
cg20545410_ITGB1	824
cg25203286_DTNA	824
cg10189859_MED23	824
cg23895065_ATG14,FBXO34	824
cg15123519_cg15123519_NA	823
cg12708994_DSE	823
cg06238491_cg06238491_NA	823
cg07927909_cg07927909_NA	823
cg16566943_MUC4	822
cg25756003_cg25756003_NA	822
cg15697036_LETM1,FGFR3	822
cg25189808_SEPT7P2	822
cg08485187_DNMT3A	821
cg09549067_EPHA6	821
cg02776750_cg02776750_NA	821
cg13520531_C19orf35,OAZ1	821
cg14585167_cg14585167_NA	821
cg02243606_RDX	820
cg10019018_cg10019018_NA	820
cg05285228_POT1,POT1-AS1	820
cg10207553_SPG21	819
cg22087209_DGKI	819
cg12940040_BTNL8	819
cg12269138_cg12269138_NA	819
cg03984405_PHF20	819
cg10776057_RASAL2	819
cg13755388_MICAL3	819
cg06690535_LINC01063	818
cg22880933_ARHGEF1	818
cg09832316_CHSY1	818
cg26614346_SP140,SP110	818
cg04225775_cg04225775_NA	817
cg02065051_ZNF337	817
cg02807482_ROPN1B	817
cg13407062_TOP1MT	817
cg01804934_cg01804934_NA	817
cg01181259_cg01181259_NA	816
cg00705730_NCK2	816
cg21475781_cg21475781_NA	816
cg19764588_HDAC5	816
cg14125468_LINC01503	815
cg07661106_TBC1D16	815
cg16617723_AQP4	815
ENSG00000049656_CLPTM1L	815
cg12915834_ANKS1A	814
cg06083001_SLFNL1,CTPS1	814
cg17086398_cg17086398_NA	814
cg13546223_cg13546223_NA	814
cg13491731_cg13491731_NA	814
cg20561300_FAM174B	813
cg21393051_cg21393051_NA	813
cg07000116_ZNF689	813
cg10061770_PRMT7	813
cg01234563_cg01234563_NA	813
cg16665765_CTDSPL	813
cg03554736_KIF1A	813
cg02927448_UHRF1BP1L	813
cg19220825_AQP5	812
cg10071493_cg10071493_NA	812
cg15918160_cg15918160_NA	812
cg14282508_cg14282508_NA	812
cg09471916_IL32	812
cg06547867_cg06547867_NA	811
cg24401737_CFLAR,CASP10	810
cg25949002_cg25949002_NA	810
cg07179000_cg07179000_NA	810
cg11990610_SPAG16	810
cg20710519_cg20710519_NA	809
cg11276093_MYOF	809
cg22812413_CFAP161	809
cg16852357_ATP8B1	809
cg06064179_PLEKHM1P1	809
cg16619352_cg16619352_NA	809
cg18635284_PRPSAP1,QRICH2	809
cg20972453_cg20972453_NA	808
cg04516896_AKAP12	808
cg00730857_NELFA	808
cg10313337_cg10313337_NA	808
cg03200571_LRP2BP,SNX25	808
cg15287987_cg15287987_NA	808
cg27517446_BMT2	807
cg22150680_cg22150680_NA	807
cg17322632_cg17322632_NA	807
cg12230983_JARID2	806
cg23521138_cg23521138_NA	806
cg10425245_SLIT3	806
cg04481779_IL20RA	806
cg11204311_RBM34,TOMM20,SNORA14B,ARID4B	806
cg25782086_cg25782086_NA	806
cg05344747_FBXO3,CD59	806
cg09741917_VWA3B	806
cg17017746_cg17017746_NA	806
cg23473955_GIT1,TP53I13,ABHD15	806
cg03364108_UPB1,ADORA2A-AS1	805
cg18199992_cg18199992_NA	805
cg04714110_SKIDA1	805
cg17353812_cg17353812_NA	805
cg06323332_MGRN1	805
cg00582663_KCNAB3,CHD3	804
cg25334215_CSTF3	804
cg22672060_cg22672060_NA	804
cg13408795_SLC9A9	804
cg08429815_cg08429815_NA	804
cg27013914_BRI3,BAIAP2L1	804
cg21244461_cg21244461_NA	804
cg03389926_COX7A2L	804
cg00986598_TMCC1	804
cg10931900_AVPR1A	804
cg04630273_ZBTB46	804
cg01815801_TFDP1	803
cg24277876_RPL13AP5	803
cg03202034_MVD,SNAI3-AS1	803
cg03726817_USP15,FAM19A2	803
cg00749609_GNG7	803
cg02371376_PSTPIP1	802
cg10541053_CC2D1B,ZFYVE9	802
cg00845742_ZNF613,ZNF350-AS1	802
cg00397714_TMEFF2	802
cg10386083_cg10386083_NA	802
cg14906553_SLC5A6,ATRAID,CAD	802
cg03437741_PTGFRN	802
cg11848931_PRTFDC1	802
cg11346522_KCNK2	802
cg04140161_MCF2L	802
cg19978910_cg19978910_NA	802
cg03368627_CADPS2	801
cg00591421_SORCS3	801
cg12582965_ATP10A	801
cg18745752_TCF7L2	801
cg02979435_STX2	801
cg20862447_cg20862447_NA	801
cg01877606_LNX1,FIP1L1	800
cg10375267_ZCCHC14	800
cg15945333_SPI1	800
cg11140044_DSTYK	800
cg23328556_VPS37B	800
cg14515032_RAP1GAP2	800
cg05853788_PEX16,MAPK8IP1	800
cg23023513_S100A2	800
cg17644227_MSI1	799
cg23481419_cg23481419_NA	799
cg04350355_cg04350355_NA	799
cg15358372_HK1	799
cg00162104_ADD1,MFSD10,NOP14-AS1	799
cg02607972_ASXL2	799
cg17216737_TAF4	799
cg20153124_cg20153124_NA	798
cg08613327_TIMP3,SYN3	798
cg06705947_cg06705947_NA	798
cg26619570_PPP1R12A	798
cg00584686_SNTG2	798
cg02480970_MAPK8	798
cg04483989_cg04483989_NA	798
cg19061690_cg19061690_NA	797
cg05315321_RAD51B	797
cg21473786_cg21473786_NA	797
cg02540338_MARCH4	797
cg07872300_cg07872300_NA	797
cg06098530_KAT6B	796
cg02392882_PDCD6IPP2	796
cg23733052_cg23733052_NA	796
cg14274759_PLEKHH2,DYNC2LI1	796
cg13456960_KDM4B	795
cg02661464_LATS1	795
cg21875839_cg21875839_NA	795
cg06150863_LINC01237	794
cg16967583_cg16967583_NA	794
cg26441893_cg26441893_NA	794
cg07217824_MTPN	794
cg09221450_cg09221450_NA	794
cg15346359_NDUFS3,C1QTNF4,KBTBD4,FAM180B	794
cg13647960_CTNNA3	794
cg14072027_cg14072027_NA	793
cg16774479_cg16774479_NA	793
cg01469547_cg01469547_NA	793
cg02140384_NFIA	793
cg05772946_NMRAL1,HMOX2	793
cg10813240_DNAH10OS,DNAH10,CCDC92	793
cg02150335_SLC4A8	793
ENSG00000103111_MON1B	793
cg01260603_cg01260603_NA	792
cg27087650_BCL3	792
cg03151319_cg03151319_NA	792
cg12588301_cg12588301_NA	792
cg08364956_GRM6	791
cg11872672_PTPRN2	791
cg07971820_ARRB2	791
cg25024734_cg25024734_NA	790
cg26312324_cg26312324_NA	790
cg19984170_TENM2	790
cg21733502_cg21733502_NA	790
cg15444626_SAMD14,PPP1R9B	789
cg23354735_LINC00672,LASP1	789
cg09139128_PACSIN1	789
cg19807207_KCNT1	789
cg16672956_BANP	789
cg18569623_FOXN3	788
cg00135293_GRIK2	788
cg01876492_cg01876492_NA	788
cg22623236_PDE10A	788
cg17217096_EPN3,SPATA20	788
cg22589728_FOXP1	787
cg17117049_MTUS1	787
cg15601071_cg15601071_NA	787
cg13113599_CAPN15,MIR3176	787
cg05131696_cg05131696_NA	787
cg21772826_TPRG1	786
cg23693752_cg23693752_NA	786
cg23127986_cg23127986_NA	786
cg17661220_SIGLEC1	785
cg08612011_AQP5	785
cg13376143_RAD54B	785
cg19795235_cg19795235_NA	784
cg27534306_cg27534306_NA	784
cg10337500_CTF1,BCL7C,MIR762HG	784
cg26214055_LINC01021	784
cg24680357_GPR180,TGDS	784
cg11995437_EPOR,PLPPR2,SWSAP1	783
cg13597051_CLIC1	783
cg04394724_C16orf72	783
cg18677101_cg18677101_NA	783
cg05516537_TFDP1	783
cg01574241_UCK2	783
cg15331603_ZMAT4	783
cg17008288_CXCL14	783
cg15538264_FBXO27	783
cg23798471_RPL21,RASL11A	783
cg10975290_IGFBP3	782
cg11821865_C11orf21	782
cg27132471_SLCO3A1	782
cg06273125_SIDT1	782
cg00051483_GIMAP7	782
cg11697120_cg11697120_NA	782
cg21301224_LYN	782
cg09939729_cg09939729_NA	782
cg09514918_cg09514918_NA	782
cg05220968_EPM2A	781
cg03161309_MED31	781
cg24439686_cg24439686_NA	781
cg24506197_PTPRN2	781
cg25794830_LINC00310	781
cg17060416_RPS3A,SH3D19	781
cg15081723_TBCE	781
cg25315503_cg25315503_NA	781
cg12389043_DNAH10,DNAH10OS,CCDC92	781
cg26416981_NINJ2	781
cg08310581_ARHGEF4,FAM168B	781
cg13556548_SDE2	780
cg09417209_LITAF	780
cg01465769_cg01465769_NA	780
cg04965094_GTF2F2	780
cg05977845_ICE1	780
cg18002862_RAP1GAP2	780
cg16425566_cg16425566_NA	780
cg18699025_FGFRL1	780
cg02971546_SH3TC1	780
cg16113661_cg16113661_NA	780
cg24534583_RNF216	780
cg27583853_CD300LG	780
cg02417857_SOX2-OT	780
cg05797854_cg05797854_NA	779
cg03386765_BCL9L	779
cg07568314_cg07568314_NA	779
cg03411579_cg03411579_NA	779
cg17540450_cg17540450_NA	779
cg06052090_EGFR	779
cg27440751_ANKRD29	779
cg02481714_FAM83F,TNRC6B	779
cg10069238_TRIO	779
cg24334230_cg24334230_NA	779
cg22388260_MIR193BHG	778
cg15089742_KSR1	778
cg23898128_MSH2	778
cg17056062_KATNAL1	777
cg24840062_CDCP1	777
cg14315912_WDR20	777
cg10596609_cg10596609_NA	777
cg00022966_RAB29	777
cg17661462_cg17661462_NA	777
cg05354946_EIF4H	777
cg12771751_INTU	776
cg04844987_ACSL5	776
cg05420802_ARHGEF7	776
cg26967305_KREMEN1	776
cg11342534_cg11342534_NA	776
cg02068486_CDC5L	776
cg22502502_TRIM38	775
cg25920857_SEMA3F-AS1,SEMA3F	775
cg15141195_FOXF2	775
cg21031128_XPO7,DOK2	775
cg13501616_cg13501616_NA	775
cg06460189_CMIP	775
cg05114334_TPST1	775
cg26063629_PXDN	775
cg02347859_CENPB,CDC25B,SPEF1	775
cg20865740_ARHGAP31	775
cg21105227_FXYD1,FXYD7,LGI4	774
cg18614735_ANK1	774
cg20580088_HIF1A	774
cg13877631_HTT	774
cg10618635_cg10618635_NA	774
cg12041429_WRAP53,TP53	774
cg09658645_cg09658645_NA	774
cg01980126_GLTSCR1L	774
cg09548403_cg09548403_NA	773
cg01802545_LGMN	773
cg01803928_DLEU1,DLEU2	773
cg26842622_OSBP2	773
cg22981555_LINC01088	773
cg03822873_AHCYL2	773
cg19973085_FBN2	773
cg00336022_FBRS	773
cg07488327_cg07488327_NA	772
cg08472008_LRPAP1	772
cg08675002_ADGRV1	772
cg20940127_cg20940127_NA	771
cg16971889_GPCPD1	771
cg14916668_GOLGA3,ANKLE2	771
cg04949041_TOMM20L	771
cg24439713_cg24439713_NA	771
cg27354586_CD3E	771
cg12670943_POLDIP3,CYB5R3	771
cg23106115_NDUFAF6	771
cg09455881_KLHL18	770
cg27378540_HMGCR,COL4A3BP	770
cg19603134_PARVG,PARVB	770
cg01132769_SMURF1	770
cg01142579_cg01142579_NA	770
cg17657618_KAZN	770
cg17846796_cg17846796_NA	770
cg18986589_GLRX3	770
cg25609220_RPL18,SULT2B1	769
cg13788819_DNMT3B	769
cg24252656_KCNIP4	769
cg04477010_WHSC1L1	769
cg24089209_MEG3	769
cg01757255_RIMS1	769
cg05635600_cg05635600_NA	768
cg03734026_PANX2,TRABD	768
cg10370872_CBFA2T3	768
cg23178546_PTPRN2	768
cg20367065_cg20367065_NA	768
cg21200986_cg21200986_NA	767
cg11384661_cg11384661_NA	767
cg11682227_H2AFY,C5orf66	767
cg25513090_KDELR2,DAGLB	767
cg23011516_cg23011516_NA	767
cg09565226_USP10	766
cg03548857_FFAR2	766
cg25761802_cg25761802_NA	766
cg22364906_BLM	766
cg19991512_FRMD5	766
cg11737334_FCHO1	766
cg27086014_cg27086014_NA	766
cg05595692_HK2	766
cg13054613_cg13054613_NA	766
cg04247746_cg04247746_NA	766
cg05884705_PLCB2	765
cg26952803_cg26952803_NA	765
cg00607609_SYNPO2	765
cg21766592_SLC1A5,FKRP	765
cg12602923_cg12602923_NA	765
cg11194132_PLPP3	765
cg16558692_PTPRN2	765
cg18859174_cg18859174_NA	764
cg13439241_cg13439241_NA	764
cg04017276_PARVB,PARVG	764
cg24427302_LLGL2,MYO15B	764
cg17554464_MIP,SPRYD4,GLS2	764
cg03331175_PTCD1,ATP5J2,ZNF789	764
cg21170583_cg21170583_NA	763
cg20749059_ARHGEF3	763
cg05768005_BORCS6	763
cg24906157_MED21	763
cg06194885_ESYT3	763
cg08798307_cg08798307_NA	762
cg27377863_TPM4	762
cg17176946_DDX10	762
cg05521767_GDPD5	762
cg24120800_TFG	762
cg21045711_NUDT6,SPATA5	762
cg07071145_cg07071145_NA	762
cg11299980_cg11299980_NA	762
cg14622017_cg14622017_NA	761
cg05471842_JAML	761
cg09795809_TENM3	761
cg18578263_SIRT2,RINL	760
cg27307183_CDYL	760
cg03208902_ZNF200	760
cg00138926_cg00138926_NA	760
cg02060443_TULP4	760
cg20188214_GAK	760
cg22510727_SRGAP1	759
cg12024826_WDFY4	759
cg03055520_SORL1	759
cg00907272_DNAJB12	759
cg09273716_TLDC2,SOGA1	759
cg18885766_CCDC85C	759
cg05836184_cg05836184_NA	759
cg24299740_GLB1L2,B3GAT1	759
cg18973515_IGDCC4	758
cg26124526_ZSWIM6	758
cg17838516_cg17838516_NA	758
cg13739417_CXCR2	758
cg21785750_cg21785750_NA	758
cg03535862_ABRACL	758
cg08166431_CLEC16A	757
cg21482472_cg21482472_NA	757
cg12510708_NFE2L3	757
cg24424525_KIAA1217	757
cg23093870_DRAIC	756
cg06881695_cg06881695_NA	756
cg17325476_SKI	756
cg01274028_LRFN4,PC	756
cg18082885_TRIM47,TRIM65	756
cg10397930_ZC3H12C	756
cg18150584_ID3	755
cg23407655_ABR	755
cg04208434_TMCC1	755
cg16264249_FAM189A1	755
cg23263226_SLC26A11,RNF213	755
cg09067506_cg09067506_NA	755
cg14487914_RGL2,PFDN6,TAPBP	755
cg13146913_cg13146913_NA	755
cg03815350_ESPL1	755
cg11567953_COL22A1	755
cg03186514_SH3RF3	755
cg26998529_BCL11B	755
cg05162202_cg05162202_NA	755
cg00083659_TST	754
cg01815263_EDEM1	754
cg22666015_INPP5D	754
cg23029021_ANO9,SIGIRR	754
cg13003883_STX18	754
cg19619028_HIVEP3	754
cg08101193_cg08101193_NA	754
cg25613227_cg25613227_NA	754
cg02481528_MATN4	753
cg12250197_MYT1	753
cg12742475_COX5A	753
cg27066989_GUCY1B2	753
cg04538289_PDE2A	753
cg16406960_GNLY	752
cg18085627_CCDC88B	752
cg22377741_CD276	752
cg11263420_FCGRT	752
cg20035971_PCMTD1,PXDNL	752
cg22348298_MTUS1	751
cg13598256_PCDHGA8,PCDHGA1,PCDHGA6,PCDHGA7,PCDHGA2,PCDHGB1,PCDHGA5,PCDHGA10,PCDHGA11,PCDHGB2,PCDHGB4,PCDHGB3,PCDHGA4,PCDHGB7,PCDHGA12,PCDHGA3,PCDHGB8P,PCDHGA9,PCDHGB6	751
cg03512997_SHROOM1,SOWAHA	751
cg10579012_cg10579012_NA	751
cg02900034_HSF1	751
cg16146033_cg16146033_NA	751
cg23846143_NOTCH4	751
cg19268453_cg19268453_NA	750
cg04361126_SLC40A1	750
cg06710741_cg06710741_NA	750
cg06475541_cg06475541_NA	750
cg24721789_SNRPE	750
cg14251009_RPS10P3	750
cg17013990_DEDD,NIT1,PFDN2	750
cg06313433_FLNB	750
cg04422741_P2RY12,MED12L	750
cg09122593_PPFIA4	749
cg03980072_cg03980072_NA	749
cg20086219_cg20086219_NA	749
cg08004525_DLEU1,DLEU2	749
cg04337828_BANP	749
cg14699146_BTAF1	749
cg10766174_PPP1R32	749
cg04598292_NCAPG2	749
cg03022926_CATSPERB,TC2N	748
cg25155298_TRERF1	748
cg00549040_cg00549040_NA	748
cg09333077_HIST1H2BK	748
cg24681307_AHCYL1	748
cg19614811_CPOX,CLDND1	748
cg04594027_POT1	748
cg25320749_cg25320749_NA	747
cg12431401_SIRT2,RINL	747
cg14624784_cg14624784_NA	747
cg08974527_FRMD4B	747
cg15090217_SLC43A2	746
cg22892432_THRB,THRB-AS1	746
cg09314421_XPO7,DOK2	746
cg01089602_MCF2L,F7	746
cg08231730_OTUB1,COX8A	746
cg03750903_GLRX2	746
cg19713638_LRCH1	746
cg11753356_GALNT2	746
cg19666225_cg19666225_NA	746
cg14935626_VSNL1	745
cg18708013_ZC3H12D	745
cg06529600_cg06529600_NA	745
cg17582074_cg17582074_NA	745
cg11630605_RUNX2	745
cg08882341_GAPDHP72	745
cg11502565_ZNF215	745
cg06544882_cg06544882_NA	745
cg05813544_CEP170B	745
cg24795461_cg24795461_NA	744
cg14050053_RAD51D,RFFL	744
cg13542368_cg13542368_NA	744
cg02029687_PRDM11	744
cg26724726_cg26724726_NA	743
cg08527124_ANKRD11	743
cg21234471_SEMA4D	743
cg04985661_PHACTR1	743
cg00555268_HELZ2	743
cg24592500_cg24592500_NA	743
cg19853143_SPRED2	743
cg18665334_ITM2C	743
cg00355377_cg00355377_NA	742
cg13863769_ZCCHC2	742
cg24217003_FGFR2	742
cg15988785_SLC7A4,P2RX6,P2RX6P	742
cg09132460_cg09132460_NA	742
cg17173423_cg17173423_NA	742
cg14839386_DYNC1H1	742
cg15193614_cg15193614_NA	742
cg09713834_CAPZA2	742
cg21512370_RB1,LPAR6	742
cg11753363_MDGA1	742
cg08574423_ZNF791,ZNF490	741
cg06864895_SLC38A2	741
cg02173969_cg02173969_NA	741
cg00676711_cg00676711_NA	741
cg24339032_PLEKHA6	741
cg09921555_STK4,PABPC1L,STK4-AS1,TOMM34	741
cg16983084_cg16983084_NA	741
cg22963777_cg22963777_NA	740
cg23411013_RORA,RORA-AS1	740
cg10465028_COX8A,OTUB1	740
cg09153458_SLC26A1,DGKQ,IDUA	740
cg24172570_HIBADH	740
cg11238082_FCRLA,FCRLB	740
cg02886263_MIR193BHG	739
cg13355129_cg13355129_NA	739
cg26084949_LTBP2	739
cg14845658_cg14845658_NA	739
cg19720377_GLP2R	739
cg13437554_C19orf35,OAZ1	739
cg11779808_cg11779808_NA	739
cg04129911_cg04129911_NA	739
cg17421890_KLC2,RAB1B	739
cg11961642_DNAH10	739
cg25631489_PHC3	738
cg10847094_FGFBP2,PROM1	738
cg19701828_cg19701828_NA	738
cg20573616_MMRN2,BMPR1A	738
cg23381267_KCNK10	738
cg23899779_cg23899779_NA	738
cg18845417_MRPS5	738
cg08380391_AATK	738
cg02223962_HS2ST1,LINC01140	738
cg10828316_NRXN3	738
cg07596467_IRF2BP1	738
cg16671301_cg16671301_NA	738
cg18506672_SNURF,SNRPN	738
cg10717691_SERTAD4	737
cg14342707_cg14342707_NA	737
cg22149419_PHF12	737
cg00401032_PNPLA6	737
cg24380059_ZBP1	737
cg01209987_cg01209987_NA	737
cg08089128_POM121	737
cg18900271_MALL	736
cg02450981_FAM229A,BSDC1,TSSK3	736
cg17823175_cg17823175_NA	736
cg05400556_HYOU1	736
cg16353272_TSC2	736
cg06646548_ZNF503-AS2,ZNF503	736
cg08864240_MOCS1	736
cg04428616_cg04428616_NA	736
cg10991752_cg10991752_NA	735
cg08998212_cg08998212_NA	735
cg24094775_TFEB	735
cg10513852_cg10513852_NA	735
cg22047552_SPAG5-AS1,KIAA0100	735
cg08128087_AZIN2	735
cg27178922_cg27178922_NA	735
cg15898414_DAB1	735
cg10212055_cg10212055_NA	735
cg22707438_DGKZ	735
cg04349266_cg04349266_NA	735
cg14109456_NEK6	734
cg12732514_cg12732514_NA	734
[truncated: 14,909 more rows]

## Sheet: top_correlations_LF1
ENSG	gene_name	cpg	R	p_value	padj	cpg_genes	DCM_mean	Control_mean	DCM_mean_genes	Control_mean_genes
ENSG00000140968	IRF8	cg14795572	0.8373172575436569	4.793556717124638e-16	5.1892816015717885e-09	CDK4,TSPAN31,AGAP2-AS1,AGAP2	0.3781883052859172	0.46398698488903417	23.247197068604564	157.03262679558784
ENSG00000076944	STXBP2	cg17933407	0.8167753873537479	9.47973022424284e-15	2.56557878332747e-08	DNPEP	0.42300865571804125	0.4537634354207043	10.694566934629387	37.52750540271591
ENSG00000188042	ARL4C	cg14795572	0.818040833654259	7.974471378247043e-15	2.56557878332747e-08	CDK4,TSPAN31,AGAP2-AS1,AGAP2	0.3781883052859172	0.46398698488903417	37.97968060286141	122.53865600482806
ENSG00000163599	CTLA4	cg24324628	0.8189134614938341	7.072607757455471e-15	2.56557878332747e-08	NHSL1	0.38864534125920536	0.46294371327241524	2.053419893584251	18.368322607473836
ENSG00000188042	ARL4C	cg13883603	0.812435378880648	1.6983356047716e-14	3.53330249131069e-08	SH2D3C	0.44231567165421165	0.4843641461218366	37.97968060286141	122.53865600482806
ENSG00000101347	SAMHD1	cg01190109	0.8066944415547159	3.5902454155307404e-14	3.53330249131069e-08	PLEKHM3	0.46144061767223976	0.514429902857645	685.5112661047573	975.4564205770611
ENSG00000198821	CD247	cg13793782	0.810420557999829	2.21498802925817e-14	3.53330249131069e-08	RALGDS	0.38379680715874065	0.43515685411324573	13.763571064341324	87.41110948890737
ENSG00000140968	IRF8	cg24543939	0.8073757153120931	3.28937421474977e-14	3.53330249131069e-08	cg24543939_NA	0.3862602897421428	0.44495023339672507	23.247197068604564	157.03262679558784
ENSG00000187474	FPR3	cg01076874	0.806998258106823	3.4529605913754696e-14	3.53330249131069e-08	LRFN1	0.38971283168539905	0.44452156403784415	33.46259227285415	78.24455166536556
ENSG00000150540	HNMT	cg08125574	0.807419596372307	3.2708440163409403e-14	3.53330249131069e-08	SLC25A4	0.47424863201590717	0.4798652961748609	199.4064724648062	212.59922436426794
ENSG00000109861	CTSC	cg05442717	0.8088278485924449	2.72639350344567e-14	3.53330249131069e-08	RARA	0.4173646622123168	0.44348041264211807	151.74088615036007	380.33583362832655
ENSG00000134602	STK26	cg00105102	0.803946175551624	5.0927243169875196e-14	3.96520863106367e-08	PMF1,BGLAP,PAQR6,SMG5	0.4324337951740654	0.4990458390875862	16.112435957456885	35.26733951070083
ENSG00000168394	TAP1	cg14795572	0.8038915310875601	5.12796095850148e-14	3.96520863106367e-08	CDK4,TSPAN31,AGAP2-AS1,AGAP2	0.3781883052859172	0.46398698488903417	311.75867397758975	609.4514309629932
ENSG00000182326	C1S	cg21339084	0.8043328142814341	4.849928980441329e-14	3.96520863106367e-08	LIMS2	0.3984582572050979	0.4229429240841304	1926.3531266245295	2610.932245302694
ENSG00000197629	MPEG1	cg03752885	0.801485362290525	6.932384410572683e-14	4.09873542909111e-08	DAPK3,EEF2	0.38471790651011606	0.44370459328985423	130.9390884008933	534.8794396054702
ENSG00000141506	PIK3R5	cg14795572	0.8013185748069659	7.07770773553759e-14	4.09873542909111e-08	CDK4,TSPAN31,AGAP2-AS1,AGAP2	0.3781883052859172	0.46398698488903417	23.234047182626934	88.00014582078353
ENSG00000043462	LCP2	cg11530289	0.802985814296908	5.74701602736545e-14	4.09873542909111e-08	RRS1,ADHFE1,RRS1-AS1	0.3869452407904704	0.44806537441036665	60.96051564282392	198.89577466355829
ENSG00000140968	IRF8	cg02254461	0.800774396289463	7.572347101720351e-14	4.09873542909111e-08	CSRNP1	0.39384034014873226	0.46516773412192	23.247197068604564	157.03262679558784
ENSG00000160255	ITGB2	cg13793782	0.8016647082671559	6.779298019852e-14	4.09873542909111e-08	RALGDS	0.38379680715874065	0.43515685411324573	103.21194398926006	427.78717300519287
ENSG00000105639	JAK3	cg14795572	0.8007871439362091	7.56039158937574e-14	4.09873542909111e-08	CDK4,TSPAN31,AGAP2-AS1,AGAP2	0.3781883052859172	0.46398698488903417	23.075482640931515	129.80939580310906
ENSG00000158714	SLAMF8	cg13341668	0.797619937258214	1.1156710756297698e-13	4.09911006887404e-08	RASSF1	0.3837956668527296	0.46136134553108343	15.410508710997123	90.9025381135212
ENSG00000090382	LYZ	cg14791193	0.7984905120442979	1.00319108848629e-13	4.09911006887404e-08	SZRD1	0.410179730058405	0.47409426949287026	102.40560764560202	764.023034559836
ENSG00000188042	ARL4C	cg14791193	0.798192913662597	1.04036502137565e-13	4.09911006887404e-08	SZRD1	0.410179730058405	0.47409426949287026	37.97968060286141	122.53865600482806
ENSG00000115415	STAT1	cg11354105	0.799417523558495	8.95347306482194e-14	4.09911006887404e-08	DNMT3A	0.3895554109894901	0.46975274100709835	1261.4791769965602	2218.618550569138
ENSG00000186517	ARHGAP30	cg13793782	0.7987640900326629	9.70138676205117e-14	4.09911006887404e-08	RALGDS	0.38379680715874065	0.43515685411324573	54.5927555160727	238.24097793423368
ENSG00000265206	AC004687.1	cg13793782	0.7981375673331179	1.04742192723178e-13	4.09911006887404e-08	RALGDS	0.38379680715874065	0.43515685411324573	3.612721031023289	34.426011861784865
ENSG00000271605	MILR1	cg05845757	0.797884332337024	1.0802972757899002e-13	4.09911006887404e-08	TFAP2E,NCDN	0.4246498939686818	0.46283563452023957	13.039718458849396	22.07595280587992
ENSG00000105639	JAK3	cg17933407	0.7995256680211009	8.835125809006979e-14	4.09911006887404e-08	DNPEP	0.42300865571804125	0.4537634354207043	23.075482640931515	129.80939580310906
ENSG00000197629	MPEG1	cg02254461	0.79851599897213	1.0000670560387801e-13	4.09911006887404e-08	CSRNP1	0.39384034014873226	0.46516773412192	130.9390884008933	534.8794396054702
ENSG00000160255	ITGB2	cg27390009	0.7974719086677371	1.1359558863947196e-13	4.09911006887404e-08	FLII,LLGL1	0.4852198430094236	0.5241851056519998	103.21194398926006	427.78717300519287
ENSG00000188042	ARL4C	cg11530289	0.796402413074376	1.29332477839011e-13	4.37529145463419e-08	RRS1,ADHFE1,RRS1-AS1	0.3869452407904704	0.44806537441036665	37.97968060286141	122.53865600482806
ENSG00000204103	MAFB	cg17933407	0.7965997895953729	1.26279842119323e-13	4.37529145463419e-08	DNPEP	0.42300865571804125	0.4537634354207043	94.54229289382684	155.68591103915563
ENSG00000160255	ITGB2	cg14795572	0.7958034590271992	1.39032910274191e-13	4.56092617068215e-08	CDK4,TSPAN31,AGAP2-AS1,AGAP2	0.3781883052859172	0.46398698488903417	103.21194398926006	427.78717300519287
ENSG00000105639	JAK3	cg27168291	0.7954803601964971	1.44550039334508e-13	4.60244561784441e-08	TAPBP,DAXX	0.3927239773594562	0.4552177453928478	23.075482640931515	129.80939580310906
ENSG00000188042	ARL4C	cg02254461	0.795144106044214	1.5051332318824599e-13	4.65539213754478e-08	CSRNP1	0.39384034014873226	0.46516773412192	37.97968060286141	122.53865600482806
ENSG00000198821	CD247	cg02453726	0.794545049776121	1.61723355391504e-13	4.807584105095951e-08	RNF14,PCDH12	0.5598364016175952	0.6029945817340386	13.763571064341324	87.41110948890737
ENSG00000125347	IRF1	cg09125300	0.7944121644376759	1.64315769972154e-13	4.807584105095951e-08	PDLIM2	0.4277558948149797	0.504339057729734	177.02915169959556	455.8556058057327
ENSG00000180353	HCLS1	cg05442717	0.7938910913366941	1.74868897382935e-13	4.98170886586941e-08	RARA	0.4173646622123168	0.44348041264211807	136.80017453345016	364.80908647635397
ENSG00000188042	ARL4C	cg22918700	0.793501229872497	1.8318424812801895e-13	5.0847884347655186e-08	EMC9,PSME1,FITM1,DCAF11	0.38718885769337086	0.44401133764343176	37.97968060286141	122.53865600482806
ENSG00000204287	HLA-DRA	cg14795572	0.7927622256715161	1.9999264280587999e-13	5.412568386093871e-08	CDK4,TSPAN31,AGAP2-AS1,AGAP2	0.3781883052859172	0.46398698488903417	1572.5110607692784	5437.492350711125
ENSG00000140968	IRF8	cg11530289	0.7922447472910931	2.1262763487965398e-13	5.4804950079926595e-08	RRS1,ADHFE1,RRS1-AS1	0.3869452407904704	0.44806537441036665	23.247197068604564	157.03262679558784
ENSG00000188042	ARL4C	cg22796355	0.7922558175428001	2.1234954120546103e-13	5.4804950079926595e-08	cg22796355_NA	0.41462054621322575	0.47359994638547365	37.97968060286141	122.53865600482806
ENSG00000182326	C1S	cg12587213	0.7917014098616709	2.2671188051467e-13	5.70762185448228e-08	cg12587213_NA	0.4636063533206654	0.4852301094051666	1926.3531266245295	2610.932245302694
ENSG00000138964	PARVG	cg14795572	0.7910514545953041	2.4472974956388297e-13	5.7476903170587596e-08	CDK4,TSPAN31,AGAP2-AS1,AGAP2	0.3781883052859172	0.46398698488903417	20.045316369938234	88.38503683839811
ENSG00000182326	C1S	cg27345762	0.790706128219575	2.5485034709030104e-13	5.7476903170587596e-08	CRHR2,INMT	0.48681889784216864	0.5248113792319203	1926.3531266245295	2610.932245302694
ENSG00000140968	IRF8	cg13793782	0.7909985758654929	2.4625422996884304e-13	5.7476903170587596e-08	RALGDS	0.38379680715874065	0.43515685411324573	23.247197068604564	157.03262679558784
ENSG00000235505	AP002004.1	cg04608651	0.7912521636157759	2.390248820503561e-13	5.7476903170587596e-08	PTRF	0.5953186976833337	0.6447251363057982	36.673612674141054	55.227351031811885
ENSG00000128604	IRF5	cg14795572	0.7907230482386559	2.54345302683038e-13	5.7476903170587596e-08	CDK4,TSPAN31,AGAP2-AS1,AGAP2	0.3781883052859172	0.46398698488903417	20.469021383800857	59.80996403748757
ENSG00000112149	CD83	cg25406657	0.7904455442813679	2.6275033958962197e-13	5.80492448467213e-08	TPM1	0.4117653099209337	0.45842899341382815	52.158220554818385	110.12983727185099

## Sheet: top_correlations_LF2
ENSG	gene_name	cpg	t_statistic	p_value	padj	cpg_genes	DCM_mean	Control_mean	DCM_mean_genes	Control_mean_genes
ENSG00000104164	BLOC1S6	cg12200188	0.7931655069796171	1.90645904095884e-13	1.7508843573804401e-06	DOCK4	0.8187846583510107	0.8001214551483006	608.5363911839752	589.7308984222816
ENSG00000032742	IFT88	cg15429179	0.7937345825461399	1.78162859011829e-13	1.7508843573804401e-06	APLP2	0.8329950298835335	0.8318302137571209	153.24852404656406	152.7118033108619
ENSG00000139372	TDG	cg24987706	0.7804623016843779	8.20013758165951e-13	2.51032451814859e-06	GPA33,DUSP27	0.7149966571712424	0.7156777739990922	174.99040929445877	180.13113415062276
ENSG00000152484	USP12	cg01958481	0.781976165566598	6.926834868002601e-13	2.51032451814859e-06	cg01958481_NA	0.8737401139287504	0.8615010931497776	466.60079623199675	442.99492928312435
ENSG00000104164	BLOC1S6	cg07491979	0.7849530252804481	4.95127021330194e-13	2.51032451814859e-06	EXOC4	0.744391171685523	0.711808828448283	608.5363911839752	589.7308984222816
ENSG00000138398	PPIG	cg04348683	0.782322303660514	6.66341165910556e-13	2.51032451814859e-06	C16orf52,VWA3A	0.6443440531572807	0.6288184489270704	838.0899555544587	816.5250465971502
ENSG00000178691	SUZ12	cg00910924	0.7774664742293459	1.1406741234466398e-12	2.90481145012728e-06	PDE10A	0.7052419424005757	0.7093821617625585	358.8369077816361	346.6321846410562
ENSG00000064313	TAF2	cg04348683	0.7735672432142758	1.73960502612163e-12	2.90481145012728e-06	C16orf52,VWA3A	0.6443440531572807	0.6288184489270704	230.46621133720265	220.63797244805326
ENSG00000275052	PPP4R3B	cg12200188	0.776344587569778	1.28905847069864e-12	2.90481145012728e-06	DOCK4	0.8187846583510107	0.8001214551483006	610.9344977425411	589.2310619466308
ENSG00000104164	BLOC1S6	cg04460007	0.773988427220918	1.66275178819934e-12	2.90481145012728e-06	DCUN1D4	0.6321574719309847	0.6227214175685424	608.5363911839752	589.7308984222816
ENSG00000127995	CASD1	cg12200188	0.77531627308761	1.44107412153832e-12	2.90481145012728e-06	DOCK4	0.8187846583510107	0.8001214551483006	505.48282051429567	462.3038941081707
ENSG00000075303	SLC25A40	cg12200188	0.769897542276891	2.56843452587728e-12	3.73827074415003e-06	DOCK4	0.8187846583510107	0.8001214551483006	309.826991226398	287.93017184347804
ENSG00000005812	FBXL3	cg13112511	0.769615307639207	2.64578241161495e-12	3.73827074415003e-06	PDE4D	0.6463128723533843	0.6515197571415816	494.34262060726763	503.39740123368233
ENSG00000054267	ARID4B	cg04348683	0.7682461011929649	3.0535780165873e-12	4.0062769087453e-06	C16orf52,VWA3A	0.6443440531572807	0.6288184489270704	442.33942107711266	445.25817614253316
ENSG00000162607	USP1	cg07491979	0.7667857601284119	3.5541987030967203e-12	4.08020234016152e-06	EXOC4	0.744391171685523	0.711808828448283	331.97616814123995	330.1041211935704
ENSG00000164830	OXR1	cg06844984	0.766986948581336	3.48086061828362e-12	4.08020234016152e-06	RBFOX1	0.8970276018417732	0.8797749639469025	769.0211640119313	668.4699013450621
ENSG00000138398	PPIG	cg12200188	0.764218866526766	4.628986673254889e-12	4.43053428797325e-06	DOCK4	0.8187846583510107	0.8001214551483006	838.0899555544587	816.5250465971502
ENSG00000112697	TMEM30A	cg06844984	0.764976053711509	4.2834060114886505e-12	4.43053428797325e-06	RBFOX1	0.8970276018417732	0.8797749639469025	1579.08008334025	1464.5668997785917
ENSG00000151292	CSNK1G3	cg12200188	0.7638145870375809	4.82420904269318e-12	4.43053428797325e-06	DOCK4	0.8187846583510107	0.8001214551483006	226.96450663565372	229.32938875723116
ENSG00000164985	PSIP1	cg00886909	0.7641107838540309	4.68042898955671e-12	4.43053428797325e-06	CFI	0.8659580586667681	0.842188274106066	721.6285413937873	712.5084984486879
ENSG00000163281	GNPDA2	cg16080958	0.7631403558400509	5.16733542690249e-12	4.50418468467561e-06	SRPK2	0.8532922064437564	0.8522818482161213	269.8880752922265	264.07782173535236
ENSG00000005812	FBXL3	cg07491979	0.762716425381865	5.39484400317856e-12	4.50418468467561e-06	EXOC4	0.744391171685523	0.711808828448283	494.34262060726763	503.39740123368233
ENSG00000141425	RPRD1A	cg12200188	0.7619098446568741	5.85429382811053e-12	4.67526959527078e-06	DOCK4	0.8187846583510107	0.8001214551483006	930.8708996371223	773.9061080431298
ENSG00000175395	ZNF25	cg12200188	0.7605531896803321	6.71218852615831e-12	5.13703924472474e-06	DOCK4	0.8187846583510107	0.8001214551483006	450.4081939636189	435.37652620965264
ENSG00000116918	TSNAX	cg07491979	0.7596889171079599	7.31974082340611e-12	5.15410275299159e-06	EXOC4	0.744391171685523	0.711808828448283	373.57257419619754	357.29535548474615
ENSG00000054267	ARID4B	cg06844984	0.7598358070319309	7.21291843785699e-12	5.15410275299159e-06	RBFOX1	0.8970276018417732	0.8797749639469025	442.33942107711266	445.25817614253316
ENSG00000135241	PNPLA8	cg13112511	0.75934430262072	7.576294666504041e-12	5.15410275299159e-06	PDE4D	0.6463128723533843	0.6515197571415816	758.7754135273268	684.2757359597089
ENSG00000137710	RDX	cg04348683	0.757901512474849	8.746315643580259e-12	5.73755807271539e-06	C16orf52,VWA3A	0.6443440531572807	0.6288184489270704	1585.4966524742506	1438.9010968886116
ENSG00000134371	CDC73	cg00910924	0.7571133915566179	9.45608548330825e-12	5.98926281622646e-06	PDE10A	0.7052419424005757	0.7093821617625585	657.2677200786454	601.8101871197684
ENSG00000147650	LRP12	cg01402099	0.754372494212354	1.2375711084340802e-11	6.68793173366823e-06	LRRC43	0.8126822683743826	0.7533775363106835	486.33290161740945	430.2600873966879
ENSG00000147679	UTP23	cg12200188	0.7532422259865841	1.3813932768787303e-11	6.68793173366823e-06	DOCK4	0.8187846583510107	0.8001214551483006	210.77197039150406	192.59350733012676
ENSG00000154511	FAM69A	cg03760138	0.753348551351154	1.3672143466792902e-11	6.68793173366823e-06	cg03760138_NA	0.8618366806536404	0.8577102360038539	94.95190699879004	96.5986290326285
ENSG00000064313	TAF2	cg06844984	0.7532256553682941	1.38361559653675e-11	6.68793173366823e-06	RBFOX1	0.8970276018417732	0.8797749639469025	230.46621133720265	220.63797244805326
ENSG00000140299	BNIP2	cg06844984	0.753664942435783	1.32583658402556e-11	6.68793173366823e-06	RBFOX1	0.8970276018417732	0.8797749639469025	1257.594736089441	1127.7318625110845
ENSG00000141425	RPRD1A	cg11230248	0.755340017756537	1.1258846583825801e-11	6.68793173366823e-06	cg11230248_NA	0.779365067339615	0.7358788186177297	930.8708996371223	773.9061080431298
ENSG00000116918	TSNAX	cg10402471	0.7532426731989821	1.3813333473842501e-11	6.68793173366823e-06	ZNF281	0.8686980875801924	0.851519968797794	373.57257419619754	357.29535548474615
ENSG00000197782	ZNF780A	cg04400944	0.7541289313174351	1.2673042934175303e-11	6.68793173366823e-06	PTCD1,BUD31	0.8113664771123786	0.8173282245647963	126.84152701958608	143.458525024522
ENSG00000145833	DDX46	cg04348683	0.7551519622738141	1.14681303585506e-11	6.68793173366823e-06	C16orf52,VWA3A	0.6443440531572807	0.6288184489270704	674.7417698023073	681.0165168073557
ENSG00000127995	CASD1	cg07491979	0.7517873677692131	1.59001749412034e-11	7.319835009970099e-06	EXOC4	0.744391171685523	0.711808828448283	505.48282051429567	462.3038941081707
ENSG00000139372	TDG	cg03472349	0.751761091499329	1.5940476678840302e-11	7.319835009970099e-06	cg03472349_NA	0.7387344096030569	0.6978153489154945	174.99040929445877	180.13113415062276
ENSG00000140299	BNIP2	cg12200188	0.7513614288742609	1.65655732732951e-11	7.421344503366409e-06	DOCK4	0.8187846583510107	0.8001214551483006	1257.594736089441	1127.7318625110845
ENSG00000005812	FBXL3	cg04460007	0.750898656167364	1.7318502148332198e-11	7.57392528524747e-06	DCUN1D4	0.6321574719309847	0.6227214175685424	494.34262060726763	503.39740123368233
ENSG00000182827	ACBD3	cg05109966	0.748727409785111	2.1307052939795398e-11	8.02229706848842e-06	GMDS,FOXC1	0.8763310755007901	0.846766821660034	564.6713425507636	492.0230472917188
ENSG00000165156	ZHX1	cg01958481	0.748949341205087	2.08624201131817e-11	8.02229706848842e-06	cg01958481_NA	0.8737401139287504	0.8615010931497776	488.50948085101567	431.8910087310387
ENSG00000139687	RB1	cg00910924	0.749128902774442	2.0509145517012397e-11	8.02229706848842e-06	PDE10A	0.7052419424005757	0.7093821617625585	676.9020744947079	670.2431738826324
ENSG00000104164	BLOC1S6	cg01958481	0.749825635087646	1.91914927769673e-11	8.02229706848842e-06	cg01958481_NA	0.8737401139287504	0.8615010931497776	608.5363911839752	589.7308984222816
ENSG00000104164	BLOC1S6	cg13112511	0.7486810628350401	2.14010381336555e-11	8.02229706848842e-06	PDE4D	0.6463128723533843	0.6515197571415816	608.5363911839752	589.7308984222816
ENSG00000110429	FBXO3	cg16507631	0.7497601617346451	1.93118020494928e-11	8.02229706848842e-06	ARHGEF10	0.8906955133709379	0.8937337618361219	990.1419460296089	1008.5712592380067
ENSG00000134371	CDC73	cg06844984	0.7488730848054409	2.10141930026915e-11	8.02229706848842e-06	RBFOX1	0.8970276018417732	0.8797749639469025	657.2677200786454	601.8101871197684

## Sheet: top_correlations_LF3
ENSG	gene_name	cpg	t_statistic	p_value	padj	cpg_genes	DCM_mean	Control_mean	DCM_mean_genes	Control_mean_genes
ENSG00000182326	C1S	cg05138702	0.8035817970827879	5.33212839052316e-14	1.25467313835181e-07	CTBP2	0.44996900713336974	0.48408310906499447	1926.3531266245295	2610.932245302694
ENSG00000182326	C1S	cg21339084	0.8043328142814341	4.849928980441329e-14	1.25467313835181e-07	LIMS2	0.3984582572050979	0.4229429240841304	1926.3531266245295	2610.932245302694
ENSG00000150540	HNMT	cg08125574	0.807419596372307	3.2708440163409403e-14	1.25467313835181e-07	SLC25A4	0.47424863201590717	0.4798652961748609	199.4064724648062	212.59922436426794
ENSG00000164128	NPY1R	cg02430183	0.81398121612446	1.38224042455909e-14	1.25467313835181e-07	WNK2	0.6122699458517037	0.6116254826006277	31.335868321836685	30.767566897494774
ENSG00000182326	C1S	cg12587213	0.7917014098616709	2.2671188051467e-13	2.57214554142904e-07	cg12587213_NA	0.4636063533206654	0.4852301094051666	1926.3531266245295	2610.932245302694
ENSG00000182326	C1S	cg19628619	0.792133017214152	2.1545390093311106e-13	2.57214554142904e-07	DPM3,EFNA1,SLC50A1	0.4628598850586172	0.4856873242438202	1926.3531266245295	2610.932245302694
ENSG00000182326	C1S	cg25282976	0.79438354469165	1.6487926822063198e-13	2.57214554142904e-07	BAIAP2-AS1,BAIAP2	0.39720824911744157	0.4214708112821499	1926.3531266245295	2610.932245302694
ENSG00000196975	ANXA4	cg08125574	0.790109648098196	2.73278550540023e-13	2.57214554142904e-07	SLC25A4	0.47424863201590717	0.4798652961748609	340.3170851733563	307.40436695521464
ENSG00000138821	SLC39A8	cg08124721	0.7925608393799641	2.0482220912562692e-13	2.57214554142904e-07	TSPAN9	0.658273333592887	0.6084995975283544	104.87018357687997	71.71635321581108
ENSG00000182326	C1S	cg27345762	0.790706128219575	2.5485034709030104e-13	2.57214554142904e-07	CRHR2,INMT	0.48681889784216864	0.5248113792319203	1926.3531266245295	2610.932245302694
ENSG00000182326	C1S	cg01815090	0.7843317805459191	5.31296320955772e-13	3.84665688437838e-07	MB	0.415673059177851	0.42778798958484127	1926.3531266245295	2610.932245302694
ENSG00000143549	TPM3	cg14465344	0.78462459531157	5.139453728772349e-13	3.84665688437838e-07	LRRC14B,PLEKHG4B,CCDC127	0.7198927212026429	0.683788953225816	2491.31458884216	1745.7022684363155
ENSG00000182326	C1S	cg15213650	0.785785502501817	4.50325823460625e-13	3.84665688437838e-07	KDM4B	0.45736966028530057	0.4954352778182622	1926.3531266245295	2610.932245302694
ENSG00000138821	SLC39A8	cg09050160	0.783206422938231	6.0332159312357e-13	3.8729601618240794e-07	SLC12A7	0.5633707091822668	0.5294004432462037	104.87018357687997	71.71635321581108
ENSG00000196975	ANXA4	cg05236720	0.783004023239712	6.17226118589605e-13	3.8729601618240794e-07	CDC42EP3	0.5161765316766286	0.5142251077404089	340.3170851733563	307.40436695521464
ENSG00000138821	SLC39A8	cg26213438	0.7815994437245899	7.22480551469698e-13	4.25007086533081e-07	SLC12A7	0.5070030706815482	0.4972395662085414	104.87018357687997	71.71635321581108
ENSG00000182326	C1S	cg04761094	0.7796995904110591	8.923304138130179e-13	4.92975987235346e-07	LIPE-AS1,LIPE	0.40543327776345384	0.4287248665637237	1926.3531266245295	2610.932245302694
ENSG00000170876	TMEM43	cg22593177	0.7792016897660521	9.427754764691719e-13	4.92975987235346e-07	FAM213A	0.6297816581046773	0.6114392421148405	1106.8132974165974	950.4474238121771
ENSG00000101871	MID1	cg17411031	0.7785034418800161	1.01811600068574e-12	5.04351893092334e-07	ATP11A	0.6562950915593895	0.6330907321085836	349.75687221760916	279.42676635193715
ENSG00000138821	SLC39A8	cg26808687	0.7767803823773349	1.22935714769645e-12	5.25951118709995e-07	RNPEP,ELF3	0.5765862371227091	0.5503828565073302	104.87018357687997	71.71635321581108
ENSG00000138821	SLC39A8	cg05314639	0.776862113459038	1.2184579279948899e-12	5.25951118709995e-07	DCUN1D2,ADPRHL1	0.7257928670092595	0.705953890907427	104.87018357687997	71.71635321581108
ENSG00000138821	SLC39A8	cg06276229	0.777504226517948	1.1359756808163602e-12	5.25951118709995e-07	NAA60	0.5874973746167707	0.5694547793002372	104.87018357687997	71.71635321581108
ENSG00000138821	SLC39A8	cg04870949	0.7720840058022641	2.0380890913006204e-12	8.340370083874959e-07	DCUN1D2,ADPRHL1	0.6210519886311253	0.6094093691552183	104.87018357687997	71.71635321581108
ENSG00000182326	C1S	cg07615351	0.7696846669595	2.62657110169952e-12	8.54034168675173e-07	ZNRF1	0.6800336797957889	0.699353242805986	1926.3531266245295	2610.932245302694
ENSG00000164128	NPY1R	cg03329019	0.7700418971344181	2.52971055845124e-12	8.54034168675173e-07	HLX	0.47396568913016984	0.4894412000372246	31.335868321836685	30.767566897494774
ENSG00000138821	SLC39A8	cg03256938	0.77016828827884	2.496262607517509e-12	8.54034168675173e-07	LINC00982,PRDM16	0.5554648081542952	0.5414773869361457	104.87018357687997	71.71635321581108
ENSG00000149218	ENDOD1	cg22593177	0.7702819273484359	2.46654932485318e-12	8.54034168675173e-07	FAM213A	0.6297816581046773	0.6114392421148405	526.7029711442995	478.62498164927507
ENSG00000164128	NPY1R	cg22168512	0.77050472677288	2.4092686321760898e-12	8.54034168675173e-07	MBP	0.4365089267554912	0.4570559404974029	31.335868321836685	30.767566897494774
ENSG00000138821	SLC39A8	cg22984256	0.7696672669671529	2.6313780705926094e-12	8.54034168675173e-07	GPSM1	0.5590123075479524	0.5461010581614506	104.87018357687997	71.71635321581108
ENSG00000182326	C1S	cg13956700	0.768354530595907	3.0192178418089e-12	9.410671044770528e-07	MYO18A	0.45147810237182706	0.47530361513389674	1926.3531266245295	2610.932245302694
ENSG00000131016	AKAP12	cg11707796	0.7681029721929209	3.09950465634018e-12	9.410671044770528e-07	cg11707796_NA	0.5958916067593207	0.57769691208804	716.8781405473571	588.160950010021
ENSG00000164128	NPY1R	cg05236720	0.766669547122789	3.59722909978617e-12	9.67364280065139e-07	CDC42EP3	0.5161765316766286	0.5142251077404089	31.335868321836685	30.767566897494774
ENSG00000182326	C1S	cg08094235	0.7674594452535041	3.3142479987621497e-12	9.67364280065139e-07	TRAPPC12	0.48182571152238246	0.5186323412828313	1926.3531266245295	2610.932245302694
ENSG00000182326	C1S	cg22168512	0.7666946142850329	3.5879056863033505e-12	9.67364280065139e-07	MBP	0.4365089267554912	0.4570559404974029	1926.3531266245295	2610.932245302694
ENSG00000138821	SLC39A8	cg13587564	0.766852079578427	3.5298626076489104e-12	9.67364280065139e-07	WDR5	0.6395506760939847	0.6230264336913344	104.87018357687997	71.71635321581108
ENSG00000187672	ERC2	cg02964434	0.7662206190079391	3.76815993423431e-12	9.85182798027828e-07	KLF13	0.5792182301203992	0.5482824528945336	17.327178578982714	10.445949110079793
ENSG00000182326	C1S	cg22697045	0.7654229765990749	4.09110933107085e-12	1.04070910724789e-06	MYBPC3,MADD	0.5658750935589422	0.5703076841780307	1926.3531266245295	2610.932245302694
ENSG00000041982	TNC	cg03329019	0.763919868003321	4.77262845581185e-12	1.1084133868915002e-06	HLX	0.47396568913016984	0.4894412000372246	276.49911425498925	407.8824431266566
ENSG00000109944	C11orf63	cg12845177	0.7635700345568921	4.94607912086664e-12	1.1084133868915002e-06	MYO1F	0.6308193220643126	0.5927292469050779	27.059554740679026	22.425442020225606
ENSG00000182326	C1S	cg11936410	0.7644740883076591	4.50964069574447e-12	1.1084133868915002e-06	TPM1	0.40179813917003615	0.4722464904124828	1926.3531266245295	2610.932245302694
ENSG00000109944	C11orf63	cg05508408	0.763994125453342	4.73656351787127e-12	1.1084133868915002e-06	DCUN1D2,DCUN1D2-AS,TMCO3	0.6060456157220053	0.5730981158040364	27.059554740679026	22.425442020225606
ENSG00000182326	C1S	cg19055098	0.7636532894290179	4.90426461466574e-12	1.1084133868915002e-06	SCN8A	0.4431766921899379	0.4671243697930438	1926.3531266245295	2610.932245302694
ENSG00000138821	SLC39A8	cg02557110	0.76281392811755	5.3416885708262195e-12	1.12965665906318e-06	SLC12A7	0.691325417954905	0.6714389064472298	104.87018357687997	71.71635321581108
ENSG00000162989	KCNJ3	cg08124721	0.7624724883542329	5.5300453331645e-12	1.12965665906318e-06	TSPAN9	0.658273333592887	0.6084995975283544	244.37000772588416	130.837918545452
ENSG00000182326	C1S	cg13546514	0.762608526749413	5.4542537588529605e-12	1.12965665906318e-06	MTMR14	0.4045286348495741	0.44693230997288835	1926.3531266245295	2610.932245302694
ENSG00000143549	TPM3	cg08124721	0.762276543093905	5.64097702985438e-12	1.12965665906318e-06	TSPAN9	0.658273333592887	0.6084995975283544	2491.31458884216	1745.7022684363155
ENSG00000138821	SLC39A8	cg13481840	0.763113797204707	5.18131608932731e-12	1.12965665906318e-06	WNK2	0.7431960372664792	0.7245316677222539	104.87018357687997	71.71635321581108
ENSG00000163618	CADPS	cg02964434	0.7616150359343671	6.03133628154668e-12	1.1826665117868e-06	KLF13	0.5792182301203992	0.5482824528945336	667.7517717723586	455.6431539185685
ENSG00000101871	MID1	cg13481840	0.761303597691655	6.22389547442697e-12	1.19551823238805e-06	WNK2	0.7431960372664792	0.7245316677222539	349.75687221760916	279.42676635193715

## Sheet: top_correlations_LF4
ENSG	gene_name	cpg	t_statistic	p_value	padj	cpg_genes	DCM_mean	Control_mean	DCM_mean_genes	Control_mean_genes
ENSG00000169446	MMGT1	cg22094045	0.7478513137976779	2.31518580080175e-11	1.60447700922903e-05	cg22094045_NA	0.7233665221938103	0.6886470953003746	575.9678360494661	512.5917506799437
ENSG00000169446	MMGT1	cg07645286	0.7398538845247671	4.86544895337869e-11	1.68593401500868e-05	RAPGEF4	0.6916725547978444	0.6483981548119399	575.9678360494661	512.5917506799437
ENSG00000122729	ACO1	cg25940008	0.714988365217134	4.16271824460314e-10	3.33089721088924e-05	WNT9A	0.7616171604124279	0.7468709508773479	1918.550787930087	1727.8924744453304
ENSG00000101266	CSNK2A1	cg24082174	0.7180588364399971	3.23321608629981e-10	3.33089721088924e-05	EIF4A2,RFC4	0.7786250132494342	0.7398239207024998	1728.4485935435696	1546.0983287238457
ENSG00000136478	TEX2	cg03759993	0.714518179365128	4.32569696792216e-10	3.33089721088924e-05	TNFRSF19	0.8167145103576668	0.7826746677342933	1557.2865964789103	1366.5288418084292
ENSG00000122729	ACO1	cg26901352	0.7160350233279441	3.8205773398145696e-10	3.33089721088924e-05	CCL17	0.6513776931295847	0.6238136171292546	1918.550787930087	1727.8924744453304
ENSG00000169446	MMGT1	cg14222679	0.719468721481261	2.8758120219419503e-10	3.33089721088924e-05	CYP4B1	0.8209836462037416	0.7952934284378608	575.9678360494661	512.5917506799437
ENSG00000165152	TMEM246	cg06825448	0.715490353033077	3.99515028193244e-10	3.33089721088924e-05	NDUFA10,MIR4786	0.8193446382219554	0.7527135021376851	1308.0266288065077	1109.3941636528207
ENSG00000112294	ALDH5A1	cg22035959	0.7217313649694871	2.37941197658032e-10	3.33089721088924e-05	ARID3A	0.7811910676479052	0.7742170714637332	1037.0430336919883	959.476863937779
ENSG00000115840	SLC25A12	cg19582222	0.701857532503967	1.18316777858142e-09	3.40105310767636e-05	cg19582222_NA	0.6678395767866041	0.6615914301894052	2740.997270944015	2553.7905956987324
ENSG00000169446	MMGT1	cg07581492	0.706552080797462	8.19761693927916e-10	3.40105310767636e-05	THRB	0.7984242927866643	0.7816180053698871	575.9678360494661	512.5917506799437
ENSG00000082213	C5orf22	cg17862146	0.7029450359093431	1.08743706846409e-09	3.40105310767636e-05	cg17862146_NA	0.5263687760115346	0.5298365098418145	465.2601636206847	442.834703224169
ENSG00000102763	VWA8	cg23834919	0.70678969685022	8.045243344000038e-10	3.40105310767636e-05	cg23834919_NA	0.7846801682965626	0.7668320225700005	1413.781604068331	1304.9332864727005
ENSG00000122729	ACO1	cg00392257	0.700949041223386	1.26920557806701e-09	3.40105310767636e-05	ISG20L2,RRNAD1	0.604771737099421	0.5888035628890891	1918.550787930087	1727.8924744453304
ENSG00000134900	TPP2	cg12487914	0.7023003336461121	1.14326360353681e-09	3.40105310767636e-05	cg12487914_NA	0.8333007952918524	0.8220340299513252	746.8728599614583	696.5105715857027
ENSG00000112294	ALDH5A1	cg05890855	0.703351657536743	1.05356514113125e-09	3.40105310767636e-05	cg05890855_NA	0.7505296741401262	0.7177080501759622	1037.0430336919883	959.476863937779
ENSG00000082213	C5orf22	cg05824768	0.705573832308121	8.854209600148279e-10	3.40105310767636e-05	MYO7B	0.7907971953891464	0.7397839913969406	465.2601636206847	442.834703224169
ENSG00000112294	ALDH5A1	cg23180841	0.701420719475656	1.22382220457212e-09	3.40105310767636e-05	cg23180841_NA	0.8133425233983663	0.8026732032251092	1037.0430336919883	959.476863937779
ENSG00000169446	MMGT1	cg07444054	0.70122131841921	1.24281715396645e-09	3.40105310767636e-05	cg07444054_NA	0.6892640741523446	0.6582093466732633	575.9678360494661	512.5917506799437
ENSG00000122729	ACO1	cg23672659	0.700880149310557	1.27596603286738e-09	3.40105310767636e-05	cg23672659_NA	0.6182707899886066	0.5717491669493053	1918.550787930087	1727.8924744453304
ENSG00000112294	ALDH5A1	cg23973885	0.706832132728394	8.018314923705918e-10	3.40105310767636e-05	MXRA8	0.5695831196749138	0.5490098187347355	1037.0430336919883	959.476863937779
ENSG00000122729	ACO1	cg08879111	0.7036907378046271	1.02608606131797e-09	3.40105310767636e-05	IL1R2	0.785214316592814	0.766202761057945	1918.550787930087	1727.8924744453304
ENSG00000165152	TMEM246	cg13244312	0.705793195930658	8.70277949904558e-10	3.40105310767636e-05	TTC9	0.5778695814098992	0.5276446489437263	1308.0266288065077	1109.3941636528207
ENSG00000122729	ACO1	cg03876085	0.702839735062608	1.0963754001262599e-09	3.40105310767636e-05	COL18A1	0.6401187949196435	0.6080189177104768	1918.550787930087	1727.8924744453304
ENSG00000122729	ACO1	cg00565412	0.701105453939664	1.25398230438051e-09	3.40105310767636e-05	MIR155HG	0.8330322046532677	0.7943178845641471	1918.550787930087	1727.8924744453304
ENSG00000101266	CSNK2A1	cg03598112	0.704341087097322	9.75270482620648e-10	3.40105310767636e-05	cg03598112_NA	0.584671553531059	0.5389681006934055	1728.4485935435696	1546.0983287238457
ENSG00000122729	ACO1	cg16244648	0.699914371034285	1.3744029599036404e-09	3.5277513425233204e-05	cg16244648_NA	0.9068488516377886	0.8760485130810755	1918.550787930087	1727.8924744453304
ENSG00000112294	ALDH5A1	cg24152264	0.698595905811484	1.5204448500488e-09	3.7632258975549e-05	cg24152264_NA	0.5390695374859825	0.49465505010407895	1037.0430336919883	959.476863937779
ENSG00000165152	TMEM246	cg11888747	0.696740204276744	1.75105896480212e-09	3.7922629280126895e-05	OGG1,TADA3	0.5838422878033893	0.5205414338965623	1308.0266288065077	1109.3941636528207
ENSG00000165152	TMEM246	cg14630001	0.697225234451265	1.6877777892207094e-09	3.7922629280126895e-05	cg14630001_NA	0.6978814825243639	0.649410153174448	1308.0266288065077	1109.3941636528207
ENSG00000066926	FECH	cg25278144	0.6979850873167591	1.5929749893321305e-09	3.7922629280126895e-05	TBC1D16	0.684594826109178	0.656069100766142	824.9899115387216	768.1294508260704
ENSG00000112294	ALDH5A1	cg09244100	0.697142282974969	1.6984446103355099e-09	3.7922629280126895e-05	PRKAG3	0.7172682295446208	0.692923464340956	1037.0430336919883	959.476863937779
ENSG00000112294	ALDH5A1	cg05762671	0.694597954006338	2.0584047460517893e-09	4.1956524480089705e-05	cg05762671_NA	0.6904873458375962	0.6459970304594974	1037.0430336919883	959.476863937779
ENSG00000112294	ALDH5A1	cg25278144	0.6946531133268828	2.04988771970233e-09	4.1956524480089705e-05	TBC1D16	0.684594826109178	0.656069100766142	1037.0430336919883	959.476863937779
ENSG00000112294	ALDH5A1	cg03616827	0.693826900869817	2.18102346458562e-09	4.31856978427864e-05	ZFAT	0.7593580386728509	0.7212595649641037	1037.0430336919883	959.476863937779
ENSG00000112294	ALDH5A1	cg10383447	0.6932248217521091	2.28154338939587e-09	4.371744789512721e-05	NDRG4,RNU6-103P	0.44901575953759587	0.40251982640314427	1037.0430336919883	959.476863937779
ENSG00000132824	SERINC3	cg01043681	0.6929202761475861	2.33404313005442e-09	4.371744789512721e-05	E2F7	0.845980981062415	0.8110027417795793	2474.855179232737	2253.4423361231343
ENSG00000112294	ALDH5A1	cg25750004	0.6901900449678101	2.8585616112613103e-09	4.56757144927561e-05	TBC1D16	0.7166163997595614	0.7183950960273394	1037.0430336919883	959.476863937779
ENSG00000122729	ACO1	cg12459932	0.690981965840885	2.6959401191394007e-09	4.56757144927561e-05	RUNX3	0.8973336721818594	0.8417112448797722	1918.550787930087	1727.8924744453304
ENSG00000166197	NOLC1	cg23598310	0.6915924296074781	2.5765972024732e-09	4.56757144927561e-05	cg23598310_NA	0.7912204356871747	0.7756084742032877	814.155297570595	761.4722189666381
ENSG00000112294	ALDH5A1	cg23834919	0.690054002237181	2.8874156619852306e-09	4.56757144927561e-05	cg23834919_NA	0.7846801682965626	0.7668320225700005	1037.0430336919883	959.476863937779
ENSG00000112294	ALDH5A1	cg01463644	0.691459319799094	2.60218540318875e-09	4.56757144927561e-05	ABCC12	0.8038700027788992	0.8042000227318545	1037.0430336919883	959.476863937779
ENSG00000169446	MMGT1	cg08527313	0.6908007265921401	2.73236636183849e-09	4.56757144927561e-05	PTPRU	0.8981031730939024	0.8835557406423019	575.9678360494661	512.5917506799437
ENSG00000102763	VWA8	cg25278144	0.68999530900457	2.89994911811191e-09	4.56757144927561e-05	TBC1D16	0.684594826109178	0.656069100766142	1413.781604068331	1304.9332864727005
ENSG00000115840	SLC25A12	cg26901352	0.6893653690713821	3.03774818516589e-09	4.67828746784049e-05	CCL17	0.6513776931295847	0.6238136171292546	2740.997270944015	2553.7905956987324
ENSG00000077380	DYNC1I2	cg12487914	0.6890488639721949	3.1092993287044e-09	4.684382497123279e-05	cg12487914_NA	0.8333007952918524	0.8220340299513252	1357.2568642052445	1251.6924476533356
ENSG00000112294	ALDH5A1	cg05103064	0.688463843277719	3.2457687342226395e-09	4.78594124573867e-05	SFMBT2	0.7211218958108995	0.7042687557413606	1037.0430336919883	959.476863937779
ENSG00000112294	ALDH5A1	cg24980995	0.686485414209893	3.75046858308326e-09	4.95311194113447e-05	DIRC3	0.7591792788350156	0.72470974401581	1037.0430336919883	959.476863937779
ENSG00000101266	CSNK2A1	cg03759993	0.6873529630175911	3.52064394150136e-09	4.95311194113447e-05	TNFRSF19	0.8167145103576668	0.7826746677342933	1728.4485935435696	1546.0983287238457

## Sheet: top_correlations_LF5
ENSG	gene_name	cpg	t_statistic	p_value	padj	cpg_genes	DCM_mean	Control_mean	DCM_mean_genes	Control_mean_genes
ENSG00000179091	CYC1	cg13976496	0.805555746371696	4.1526220340772986e-14	6.80588174604251e-07	cg13976496_NA	0.7835932489125357	0.7842402255638966	6727.706457859898	7477.875392356857
ENSG00000130159	ECSIT	cg13976496	0.797798514878826	1.09165990865806e-13	8.94580362028203e-07	cg13976496_NA	0.7835932489125357	0.7842402255638966	1789.0221394142382	1836.2040413362135
ENSG00000139914	FITM1	cg13976496	0.7906350659979771	2.56981941883036e-13	1.29109520275111e-06	cg13976496_NA	0.7835932489125357	0.7842402255638966	1172.5057725335196	1399.6490868328722
ENSG00000130193	THEM6	cg13976496	0.7869547360803241	3.93882129244554e-13	1.29109520275111e-06	cg13976496_NA	0.7835932489125357	0.7842402255638966	259.217683286789	308.87892674903395
ENSG00000183134	PTGDR2	cg04888360	0.7881412851104092	3.43535965307781e-13	1.29109520275111e-06	CRTAC1	0.677346147680991	0.6525625358247007	104.11690006056429	103.66573503296797
ENSG00000130725	UBE2M	cg13976496	0.781321295998129	7.45260713298073e-13	1.74490658915699e-06	cg13976496_NA	0.7835932489125357	0.7842402255638966	1062.1411373242336	1058.6491610171913
ENSG00000054148	PHPT1	cg13976496	0.7825743168994541	6.477657932330971e-13	1.74490658915699e-06	cg13976496_NA	0.7835932489125357	0.7842402255638966	1804.0353298857588	1982.6595083860605
ENSG00000103507	BCKDK	cg13976496	0.77808270095626	1.0662480625296702e-12	2.18439041826266e-06	cg13976496_NA	0.7835932489125357	0.7842402255638966	1184.4350042511749	1229.31404949298
ENSG00000176894	PXMP2	cg09548403	0.7757830668144681	1.37006424352742e-12	2.49494179003317e-06	cg09548403_NA	0.42801646719407477	0.46239288362659864	146.77496854597425	190.32157095193529
ENSG00000117266	CDK18	cg13976496	0.7713943729171279	2.19292595974975e-12	3.30965196475524e-06	cg13976496_NA	0.7835932489125357	0.7842402255638966	3250.415693827841	3413.3802490159246
ENSG00000176894	PXMP2	cg14565465	0.771272920792533	2.22132966829135e-12	3.30965196475524e-06	TMEM2	0.6771432393970382	0.6826949139171199	146.77496854597425	190.32157095193529
ENSG00000148308	GTF3C5	cg13976496	0.7675278774613079	3.29075630463028e-12	4.21468066037287e-06	cg13976496_NA	0.7835932489125357	0.7842402255638966	639.6857535293499	737.4746492909036
ENSG00000161714	PLCD3	cg13976496	0.7666663441575791	3.5984220629262003e-12	4.21468066037287e-06	cg13976496_NA	0.7835932489125357	0.7842402255638966	1058.5865032439178	1376.7100631075218
ENSG00000183134	PTGDR2	cg21444002	0.764858333737244	4.3354712294107e-12	4.21468066037287e-06	CTIF	0.847235575034275	0.8472586107014685	104.11690006056429	103.66573503296797
ENSG00000090621	PABPC4	cg13976496	0.7661982304323391	3.7768837750022914e-12	4.21468066037287e-06	cg13976496_NA	0.7835932489125357	0.7842402255638966	2467.728919035639	2470.2734682681657
ENSG00000137309	HMGA1	cg13976496	0.76513348166742	4.2147084759092095e-12	4.21468066037287e-06	cg13976496_NA	0.7835932489125357	0.7842402255638966	506.31245801873933	589.9536890252582
ENSG00000179262	RAD23A	cg13976496	0.764777183562706	4.37171257610662e-12	4.21468066037287e-06	cg13976496_NA	0.7835932489125357	0.7842402255638966	1651.909830406675	1725.5491615749443
ENSG00000108528	SLC25A11	cg13976496	0.763264923755252	5.10223979142999e-12	4.40118130253005e-06	cg13976496_NA	0.7835932489125357	0.7842402255638966	3487.822084846323	3625.8569370954233
ENSG00000183134	PTGDR2	cg09457245	0.7634636936303109	4.99998228104354e-12	4.40118130253005e-06	ZNF385A	0.7489802560960866	0.7396530676460157	104.11690006056429	103.66573503296797
ENSG00000177646	ACAD9	cg15893295	0.762721299665325	5.39217478347586e-12	4.41871468546539e-06	LINC01108	0.4571711561092084	0.4731150576087923	690.0649475376256	741.7119353780716
ENSG00000089693	MLF2	cg13976496	0.76062039571355	6.6670129869304e-12	5.20324171273703e-06	cg13976496_NA	0.7835932489125357	0.7842402255638966	2076.2656735539017	2115.7867924054917
ENSG00000176946	THAP4	cg13976496	0.755344339187024	1.1254080313791e-11	6.5873990618440596e-06	cg13976496_NA	0.7835932489125357	0.7842402255638966	885.0958164012026	923.1318707876541
ENSG00000069998	HDHD5	cg13976496	0.75608432690099	1.0465623946491e-11	6.5873990618440596e-06	cg13976496_NA	0.7835932489125357	0.7842402255638966	961.6288596137297	1073.0509325156472
ENSG00000099308	MAST3	cg13179330	0.7571560693273109	9.41628694851377e-12	6.5873990618440596e-06	SPTBN1,RPL23AP32	0.5597182232099303	0.6055106467593473	82.79128258165652	104.67062317157433
ENSG00000130560	UBAC1	cg13976496	0.757508408420251	9.09375325909534e-12	6.5873990618440596e-06	cg13976496_NA	0.7835932489125357	0.7842402255638966	1327.9491893247762	1354.080663876042
ENSG00000134590	RTL8C	cg13976496	0.7565768647255021	9.97026938916069e-12	6.5873990618440596e-06	cg13976496_NA	0.7835932489125357	0.7842402255638966	3137.0465804949376	3492.2837192178636
ENSG00000181991	MRPS11	cg13976496	0.7558450516356949	1.0714634502270599e-11	6.5873990618440596e-06	cg13976496_NA	0.7835932489125357	0.7842402255638966	450.87427981992244	459.1495620860937
ENSG00000072954	TMEM38A	cg21055554	0.7553560315480908	1.1241193985506901e-11	6.5873990618440596e-06	TPCN1,IQCD	0.45181713789349875	0.47471146875101405	732.928966483948	805.7827647447974
ENSG00000099341	PSMD8	cg03580065	0.7544932773297169	1.22307369787772e-11	6.68179838034974e-06	PGAM1	0.7031253128681569	0.6710476522068626	3758.995110810788	3572.5977179450897
ENSG00000126768	TIMM17B	cg13976496	0.7545151206601441	1.2204691874470699e-11	6.68179838034974e-06	cg13976496_NA	0.7835932489125357	0.7842402255638966	683.9418261721393	844.1347514481937
ENSG00000105197	TIMM50	cg13976496	0.7537834414141591	1.31064808609387e-11	6.7127135363448314e-06	cg13976496_NA	0.7835932489125357	0.7842402255638966	887.0763509611355	873.6680941863095
ENSG00000066136	NFYC	cg02886263	0.7539009015863101	1.29575617733794e-11	6.7127135363448314e-06	MIR193BHG	0.5263140826856932	0.5141514210579277	955.2272404304875	972.7219784628288
ENSG00000183134	PTGDR2	cg26557617	0.7522304433545229	1.52350211690544e-11	7.56643171355316e-06	cg26557617_NA	0.7013711701062026	0.6750585770687207	104.11690006056429	103.66573503296797
ENSG00000144647	POMGNT2	cg13976496	0.750328721217586	1.8290547835535e-11	8.81677567864129e-06	cg13976496_NA	0.7835932489125357	0.7842402255638966	421.5067799315001	426.78864290940487
ENSG00000167792	NDUFV1	cg13976496	0.74985109360348	1.91449047164601e-11	8.96493530182178e-06	cg13976496_NA	0.7835932489125357	0.7842402255638966	6443.484921926876	6713.091777823374
ENSG00000156990	RPUSD3	cg13976496	0.747347381391581	2.4280775133176305e-11	9.948659118416873e-06	cg13976496_NA	0.7835932489125357	0.7842402255638966	375.7668491726544	436.19716075958826
ENSG00000167363	FN3K	cg13976496	0.7475717318899999	2.37718658853983e-11	9.948659118416873e-06	cg13976496_NA	0.7835932489125357	0.7842402255638966	708.0389176262781	758.1128990731536
ENSG00000176894	PXMP2	cg18150584	0.748017437250389	2.2790773380130298e-11	9.948659118416873e-06	ID3	0.5504986174934331	0.58374265899644	146.77496854597425	190.32157095193529
ENSG00000176894	PXMP2	cg02108620	0.747651775563641	2.35927646653731e-11	9.948659118416873e-06	ULK4	0.6128650712117881	0.644058484527932	146.77496854597425	190.32157095193529
ENSG00000183134	PTGDR2	cg20834178	0.7477012236804742	2.34827642443652e-11	9.948659118416873e-06	TBC1D14	0.6525755427930489	0.6266299274075673	104.11690006056429	103.66573503296797
ENSG00000250479	CHCHD10	cg13976496	0.746335396626038	2.67078644717251e-11	1.0422019182340801e-05	cg13976496_NA	0.7835932489125357	0.7842402255638966	4367.699889153752	5104.162945576439
ENSG00000104879	CKM	cg13976496	0.7465789244158649	2.610356781086e-11	1.0422019182340801e-05	cg13976496_NA	0.7835932489125357	0.7842402255638966	60397.99329080042	66193.31233287412
ENSG00000161267	BDH1	cg07546943	0.7458507663351491	2.795023482224689e-11	1.06531735020079e-05	AGAP1	0.6628760857260753	0.6555551435090631	1387.4829745809263	1309.3988835949856
ENSG00000132507	EIF5A	cg13976496	0.744926043610882	3.04748012017168e-11	1.11545877157183e-05	cg13976496_NA	0.7835932489125357	0.7842402255638966	2302.6730591423598	2384.3490404149993
ENSG00000130560	UBAC1	cg03580065	0.7448726599876391	3.0626970620410195e-11	1.11545877157183e-05	PGAM1	0.7031253128681569	0.6710476522068626	1327.9491893247762	1354.080663876042
ENSG00000149925	ALDOA	cg13976496	0.744585895595213	3.14568285067604e-11	1.11941792841289e-05	cg13976496_NA	0.7835932489125357	0.7842402255638966	30026.13515855574	32708.469100226517
ENSG00000159685	CHCHD6	cg13976496	0.7442780700439531	3.23714033493904e-11	1.11941792841289e-05	cg13976496_NA	0.7835932489125357	0.7842402255638966	111.7149767809014	121.00719123991207
ENSG00000072954	TMEM38A	cg24178897	0.744141659590302	3.27847216510093e-11	1.11941792841289e-05	RAD51B	0.6285179251941843	0.6014526915139091	732.928966483948	805.7827647447974
ENSG00000101400	SNTA1	cg13976496	0.742856447075868	3.69330714574431e-11	1.20257774387305e-05	cg13976496_NA	0.7835932489125357	0.7842402255638966	3402.956135194244	3613.13645951157
